# Supplementary material for: A nickel/organoboron catalyzed metallaphotoredox platform for C(sp2)–P and C(sp2)–S bond construction
Source: Royal Society of Chemistry journal article supplement (doi:10.1039/d1qo01778k), 2022-01-01

## Supporting Information

### **A Nickel/Organoboron Catalyzed Metallaphotoredox Platform for C(sp<sup>2</sup>)-P and C(sp<sup>2</sup>)-S Bond Construction**

Yuan Zhu, Weisai Zu, Qing Tian, Zifeng Cao, Yu Wei,\* Liang Xu\*

School of Chemistry and Chemical Engineering/Key Laboratory for Green Processing  
of Chemical Engineering of Xinjiang Bingtuan, Shihezi University, Shihezi, 832003,  
China.

## Content

|    |                                                                                       |    |
|----|---------------------------------------------------------------------------------------|----|
| 1. | General considerations .....                                                          | 2  |
| 2. | The reaction condition screening for the synthesis of triarylphosphine oxides.....    | 3  |
| 3. | The synthesis of triarylphosphine oxides .....                                        | 5  |
| 4. | The synthesis of thioethers.....                                                      | 6  |
|    | 3.1 Control experiments for the used reaction conditions in thioether synthesis ..... | 6  |
|    | 3.2 General procedure for the synthesis of thioethers .....                           | 6  |
| 5. | A summary of unsuccessful cases .....                                                 | 8  |
| 6. | Stern-Volmer experiments .....                                                        | 9  |
| 7. | Characterization data .....                                                           | 18 |
| 8. | References.....                                                                       | 39 |
| 9. | Copies of NMR spectra .....                                                           | 41 |

## 1. General considerations

**General.** Unless otherwise noted, all reactions were carried out under an air atmosphere. Analytical thin-layer chromatography (TLC) was performed on glass plates coated with 0.25 mm 230–400 mesh silica gel containing a fluorescent indicator. Visualization was accomplished by exposure to a UV lamp. All the products in this article are compatible with standard silica gel chromatography. Column chromatography was performed on silica gel (200–300 mesh) using standard methods.

**Structural analysis.** NMR spectra were measured on a Bruker Ascend 400 spectrometer and chemical shifts ( $\delta$ ) are reported in parts per million (ppm).  $^1\text{H}$  NMR spectra were recorded at 400 MHz in NMR solvents and referenced internally to corresponding solvent resonance, and  $^{13}\text{C}$  NMR spectra were recorded at 101 MHz and referenced to corresponding solvent resonance. Coupling constants are reported in Hz with multiplicities denoted as s (singlet), d (doublet), t (triplet), q (quartet), m (multiplet) and br (broad). Infrared spectra were collected on a Thermo Fisher Nicolet 6700 FT-IR spectrometer using ATR (Attenuated Total Reflectance) method. Absorption maxima ( $\nu$  max) are reported in wavenumbers ( $\text{cm}^{-1}$ ). High resolution mass spectra (HRMS) were acquired on Thermo Scientific LTQ Orbitrap XL with an ESI source.

**Materials.** Commercial reagents and solvent were purchased from Adamas, J&K, Energy, Sigma-Aldrich, Alfa Aesar, Acros Organics, TCI and used as received unless otherwise stated.

## 2. The reaction condition screening for the synthesis of triarylphosphine oxides

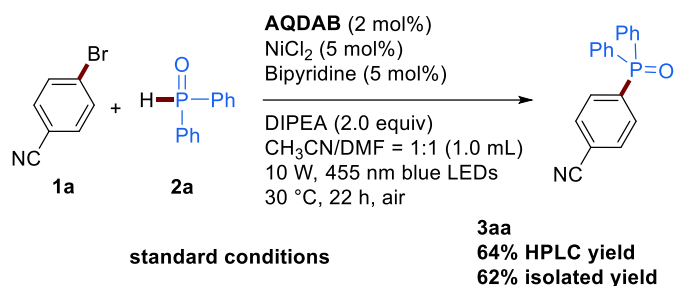

**Table S1** Optimization of the reaction conditions

| Entry                                          | Variations from the 'standard' conditions              | HPLC yield (%) |
|------------------------------------------------|--------------------------------------------------------|----------------|
| 1.                                             | none                                                   | 64             |
| <i>the dosage of AQDAB</i>                     |                                                        |                |
| 2.                                             | 5 mol% AQDAB                                           | 64             |
| 3.                                             | 1 mol% AQDAB                                           | 64             |
| 4.                                             | 0.5 mol% AQDAB                                         | 64             |
| 5.                                             | 0.1 mol% AQDAB                                         | 61             |
| 6.                                             | 0.05 mol% AQDAB                                        | 53             |
| <i>the dosage of NiCl<sub>2</sub> + ligand</i> |                                                        |                |
| 7.                                             | NiCl <sub>2</sub> 10 mol%, bpy 10 mol%                 | 64             |
| 8.                                             | NiCl <sub>2</sub> 20 mol%, bpy 20 mol%                 | 64             |
| <i>Photocatalyst used instead of AQDAB</i>     |                                                        |                |
| 9.                                             | 2 mol% CdS                                             | 37             |
| 10.                                            | 2 mol% Ir(ppy) <sub>2</sub> (dtbbpy)(PF <sub>6</sub> ) | 46             |
| 11.                                            | 2 mol% 4CzIPN                                          | 49             |
| 12.                                            | 2 mol% TXO                                             | 45             |
| <i>Ligand used instead of bpy</i>              |                                                        |                |
| 13.                                            | dtbbpy                                                 | 43             |
| 14.                                            | 4,4'-dimethyl-2,2'-bipyridine                          | 52             |
| 15.                                            | 1,10-phenanthroline monohydrate                        | 51             |
| 16.                                            | 5,5'-dimethyl-2,2'-bipyridine                          | 53             |
| 17.                                            | triphenylphosphine                                     | 37             |
| <i>Base used instead of DIPEA</i>              |                                                        |                |
| 18.                                            | TEA                                                    | 52             |
| 19.                                            | DBU                                                    | 24             |
| 20.                                            | DABCO                                                  | 16             |
| 21.                                            | tBuOK                                                  | 25             |

|                         |                                   |    |
|-------------------------|-----------------------------------|----|
| 22.                     | 2,6-lutidine                      | 24 |
| <i>Solvent used</i>     |                                   |    |
| 23.                     | Toluene                           | 22 |
| 24.                     | Dichloroethane                    | 38 |
| 25.                     | THF                               | 48 |
| 26.                     | Acetone                           | 23 |
| <i>Other variations</i> |                                   |    |
| 27.                     | Ar atmosphere                     | 63 |
| 28.                     | 1.0 equiv DIPEA                   | 38 |
| 29.                     | 3.0 equiv DIPEA                   | 51 |
| 30.                     | Reaction time 30 hours            | 60 |
| 31.                     | 5.0 equiv diphenylphosphine oxide | 75 |

### 3. The synthesis of triarylphosphine oxides

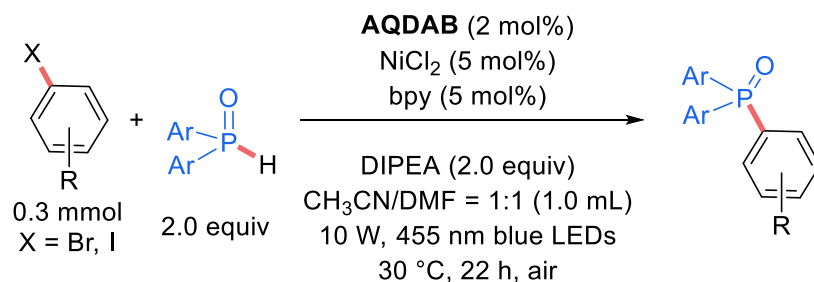

**General Procedure A:** A flame-dried 25 mL quartz column reaction tube was placed with a magnetic stir bar. Then, aryl bromide /aryl iodine (0.3 mmol, 1.0 equiv), diphenylphosphine oxide (120.7 mg, 0.6 mmol, 2.0 equiv), AQDAB (2.6 mg, 0.006 mmol, 2 mol%), NiCl<sub>2</sub> (1.9 mg, 0.015 mmol, 5 mol%), bpy (2.3 mg, 0.015 mmol, 5 mol%), DIPEA (77.5 mg, 0.6 mmol, 2.0 equiv), and CH<sub>3</sub>CN/DMF (0.5/0.5 mL) were added. The reaction tube was placed on a photocatalytic parallel reactor with a 455 - 460 nm blue LEDs light source (10 W) at the bottom (**Figure S1**). Then the reaction mixture was irradiated with the 455 nm blue LEDs (at approximately 0.3 cm away from the light source). After stirring for 22 hours at 25 °C, the reaction mixture was added 20 mL H<sub>2</sub>O and then extracted with ethyl acetate (3 × 10 mL). The combined organic phase was washed with brine (2 × 5.0 mL), dried over anhydrous Na<sub>2</sub>SO<sub>4</sub>, and concentrated under vacuum to afford the crude product, which was purified by column chromatography on silica gel using petroleum ether/ethyl acetate as eluent to give the target products.

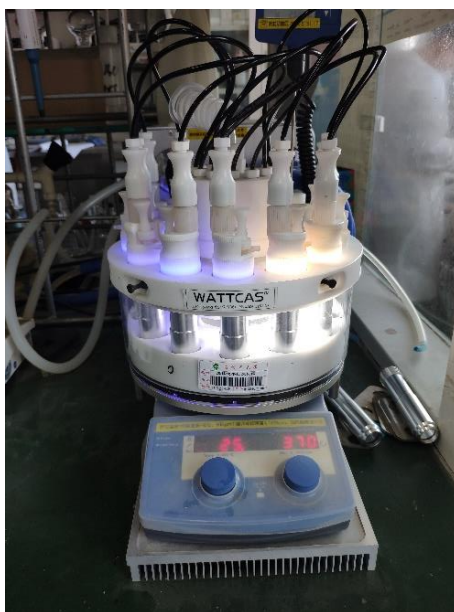

**Figure S1.** Picture of the reactor

## 4. The synthesis of thioethers

### 3.1 Control experiments for the used reaction conditions in thioether synthesis

Table S2. The control experiments for the thioether synthesis <sup>[a]</sup>

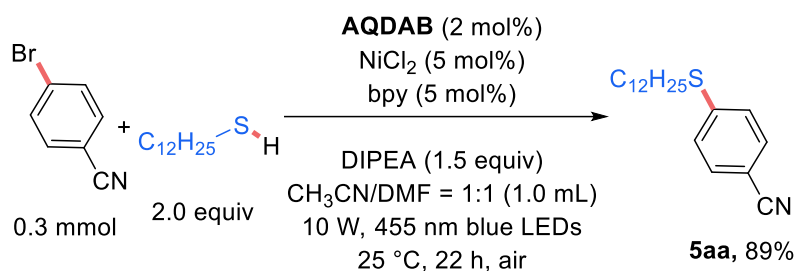

| Entry | Variations from the 'standard' conditions | Yield (%) <sup>[a]</sup> |
|-------|-------------------------------------------|--------------------------|
| 1     | no AQDAB                                  | 4                        |
| 2     | no $NiCl_2$                               | 12                       |
| 3     | no bpy                                    | 36                       |
| 4     | no light                                  | N. D.                    |
| 5     | no DIPEA                                  | N. D.                    |

Standard reaction conditions: 4-bromobenzonitrile (0.3 mmol, 1.0 equiv), 1-dodecanethiol (0.6 mmol, 2.0 equiv), AQDAB (0.006 mmol, 2 mol%),  $NiCl_2$  (0.015 mmol, 5 mol%), bpy (0.015 mmol, 5 mol%), DIPEA (0.45 mmol, 1.5 equiv), and  $CH_3CN/DMF$  (0.5/0.5 mL), 10 W 455 nm blue LEDs, 25 °C, air, 22 h. <sup>[a]</sup> Isolated yield. N.D. = not detected.

### 3.2 General procedure for the synthesis of thioethers

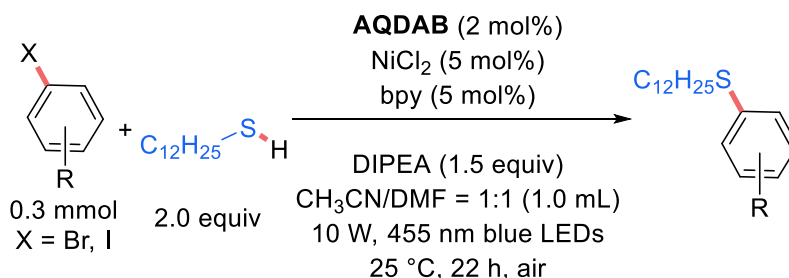

**General Procedure B:** A flame-dried 25 mL quartz column reaction tube was placed with a magnetic stir bar. Then, aryl bromide /aryl iodide (0.3 mmol, 1.0 equiv), 1-dodecanethiol (121.4 mg, 0.6 mmol, 2.0 equiv), AQDAB (2.6 mg, 0.006 mmol, 2 mol%),  $NiCl_2$  (1.9 mg, 0.015 mmol, 5 mol%), bpy (2.3 mg, 0.015 mmol, 5 mol%), DIPEA (58.2 mg, 0.45 mmol, 1.5 equiv), and  $CH_3CN/DMF$  (0.5/0.5 mL) were added. The reaction tube was placed on a photocatalytic parallel reactor with a 455 - 460 nm blue LEDs light source (10 W) at the bottom (**Figure S1**). Then the reaction mixture was irradiated with the 455 nm blue LEDs (at approximately 0.3 cm away from the light source). After stirring for 22 hours at 25 °C, the reaction mixture was added 20 mL  $H_2O$  and then extracted with ethyl acetate ( $3 \times 10$  mL). The combined organic phase was washed with brine ( $2 \times 5.0$  mL), dried over anhydrous  $Na_2SO_4$ , and concentrated

under vacuum to afford the crude product, which was purified by column chromatography on silica gel using petroleum ether/ethyl acetate as eluent to give the target products.



## 5. A summary of unsuccessful cases

*not reactive*

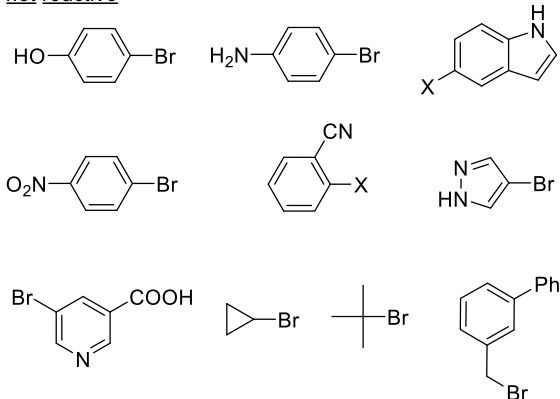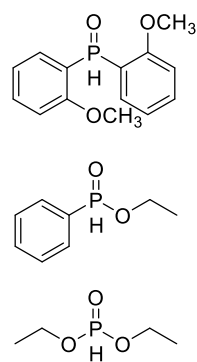

*reactive, hard to purify*

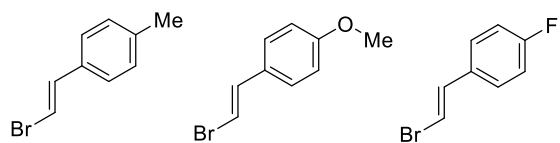

*not reactive*

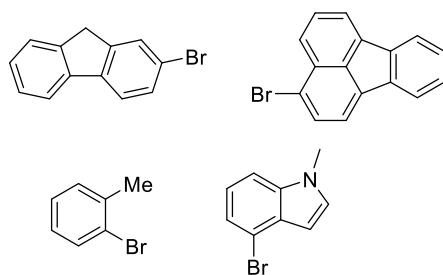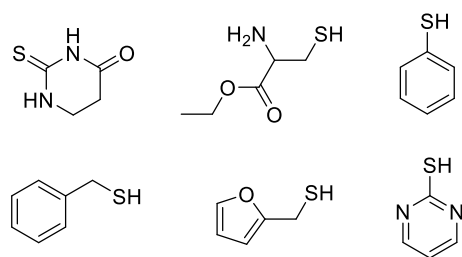

**Scheme S1** A summary of unsuccessful coupling counterparts

## 6. Stern-Volmer experiments

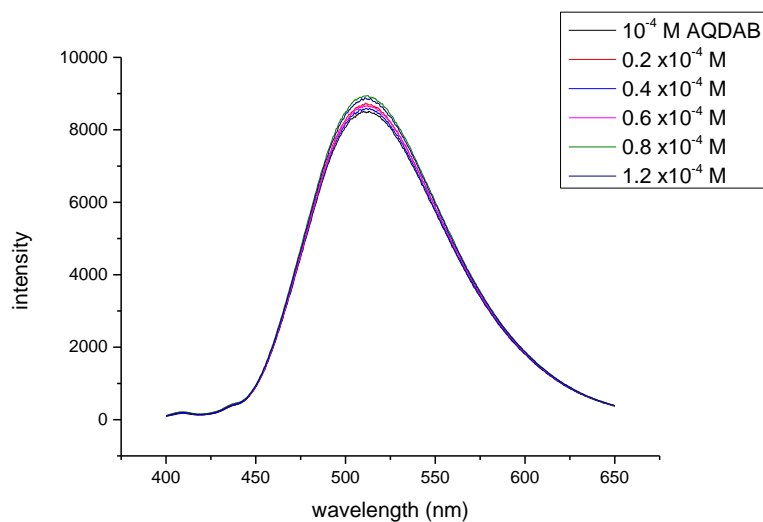

**Figure S2** Fluorescence quenching data with AQDAB (0.1 mM) and variable diphenylphosphine oxide ( $10^{-4}$  M)

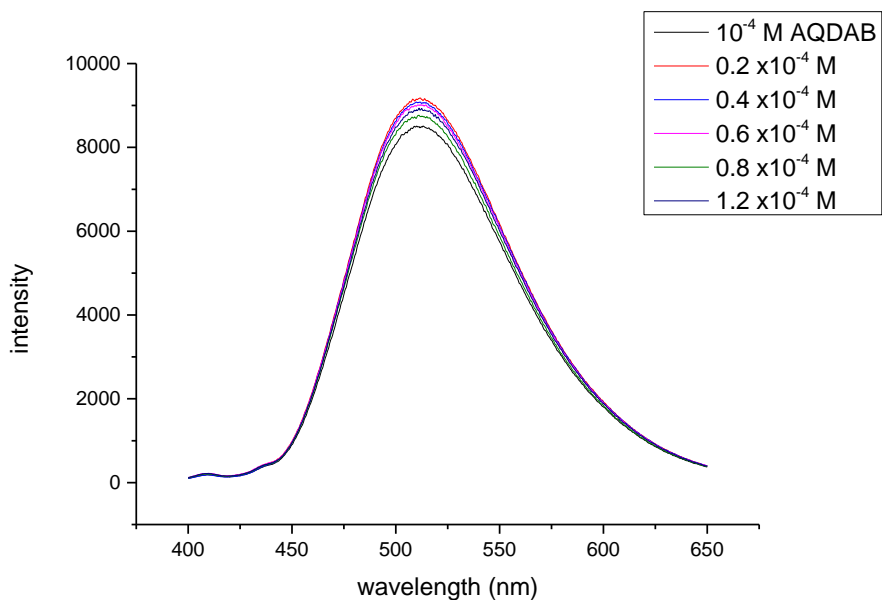

**Figure S3** Fluorescence quenching data with AQDAB (0.1 mM) and variable DIPEA ( $10^{-4}$  M)

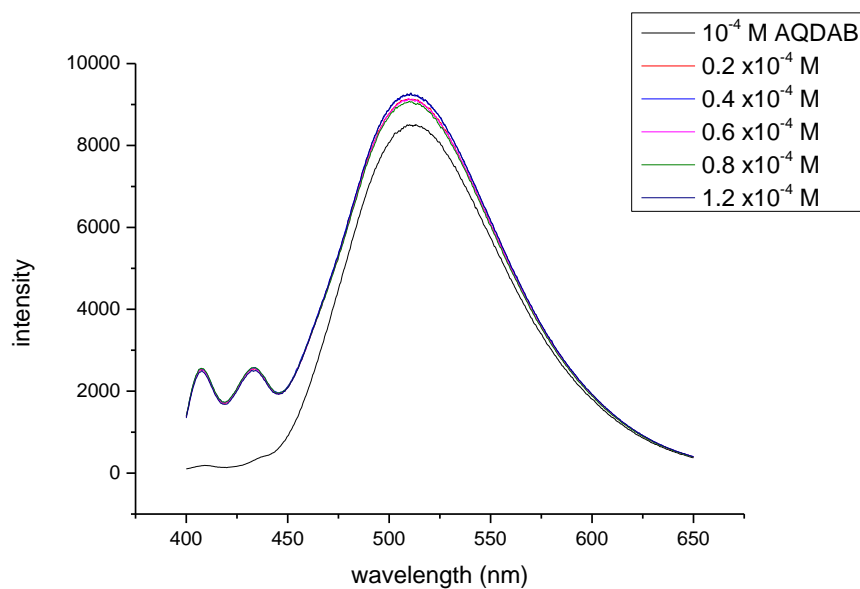

**Figure S4** Fluorescence quenching date with AQDAB (0.1 mM) and variable  $C_{12}H_{25}SH$  ( $10^{-4}$  M)

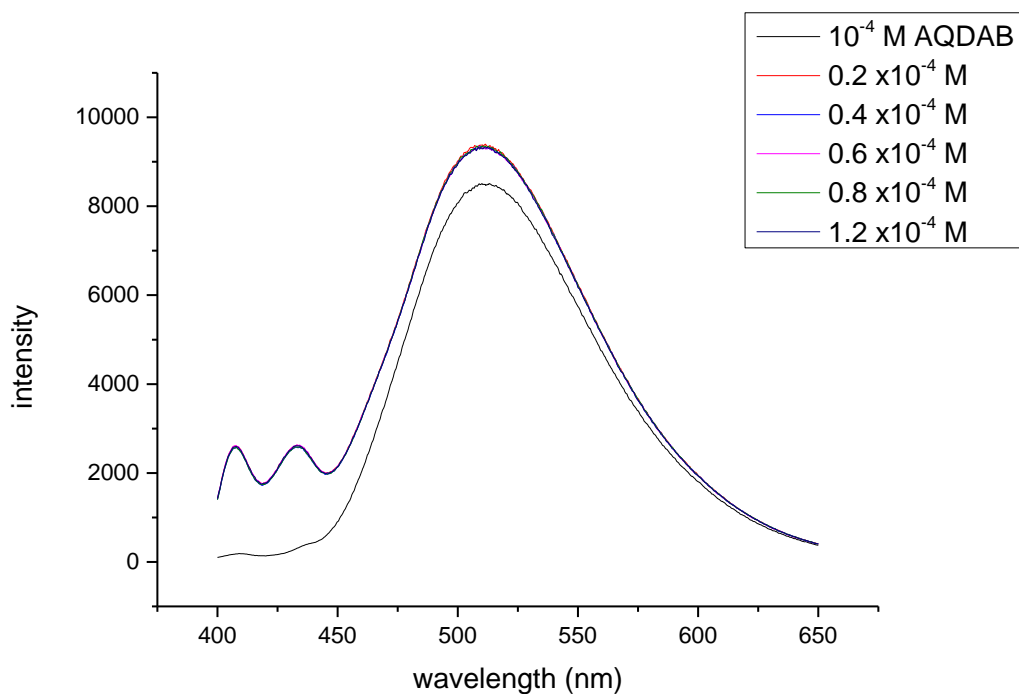

**Figure S5** Fluorescence quenching date with AQDAB (0.1 mM) and variable  $NiCl_2$  ( $10^{-4}$  M)

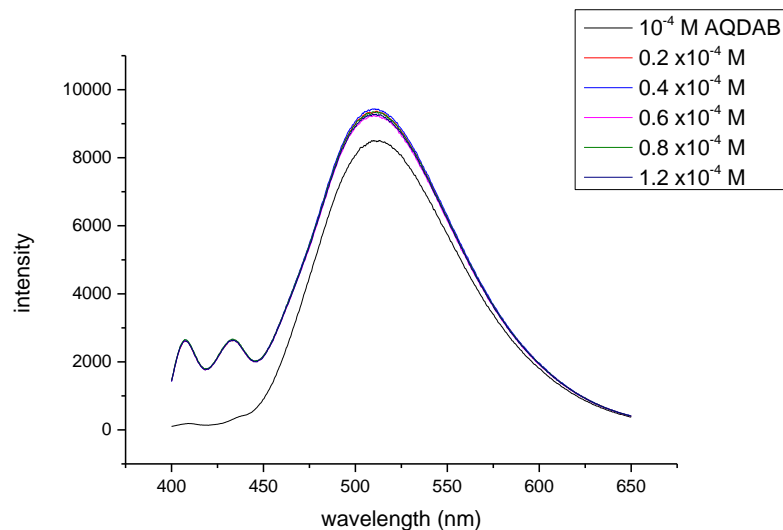

**Figure S6** Fluorescence quenching date with AQDAB (0.1 mM) and variable 4-bromobenzonitrile ( $10^{-4}$  M)

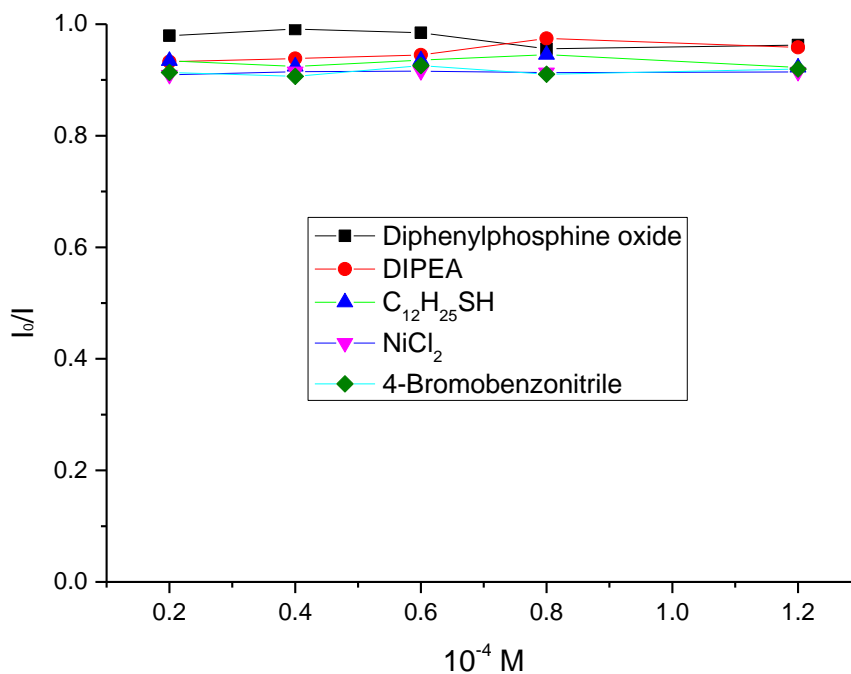

**Figure S7** Stern-Volmer plots of AQDAB (0.1 mM) and five quenchers.  $I_0$  and  $I$  were luminescence intensities in the absence and presence of the indicated concentrations ( $10^{-4}$  M) of the corresponding quencher, respectively. The solutions were irradiated at 387 nm and fluorescence was measured from 300 nm to 650 nm.

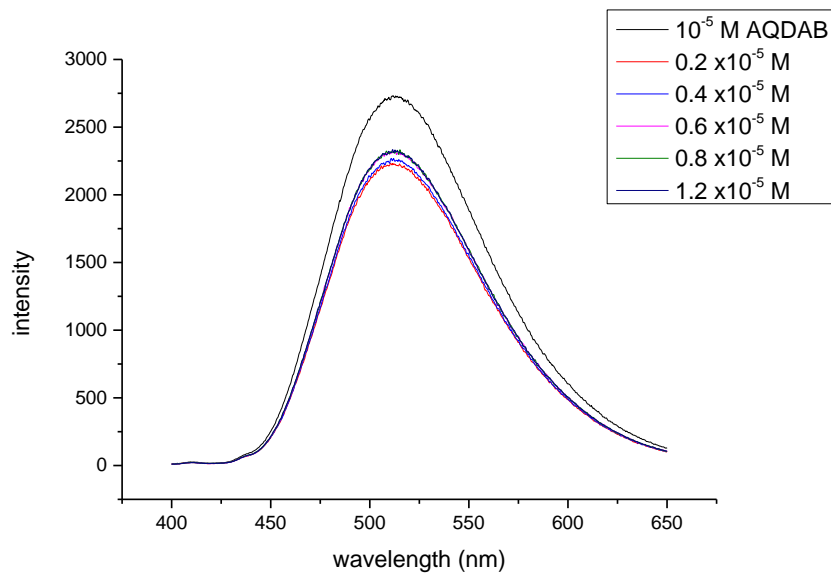

**Figure S8** Fluorescence quenching date with AQDAB (0.01 mM) and variable diphenylphosphine oxide ( $10^{-5}$  M)

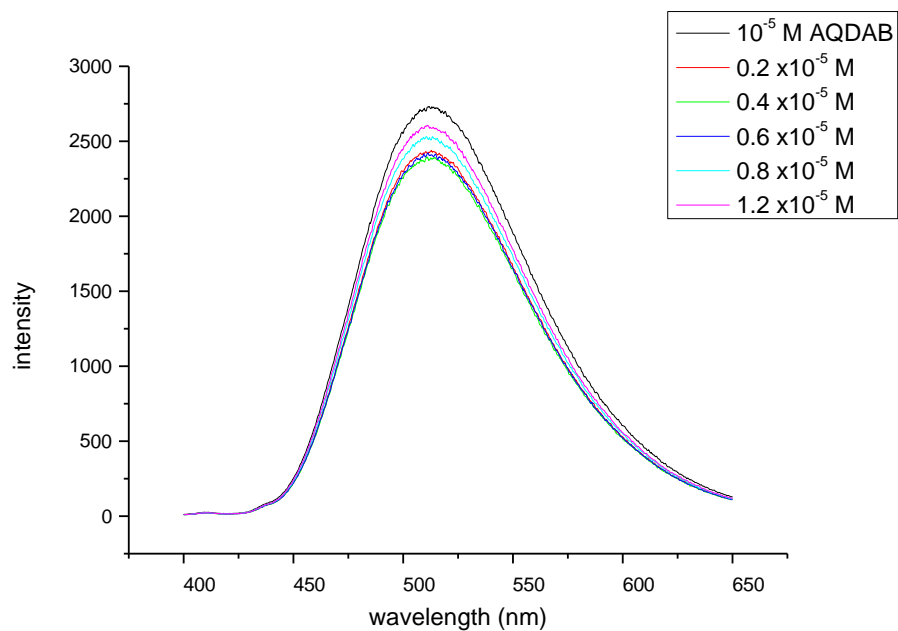

**Figure S9** Fluorescence quenching date with AQDAB (0.01 mM) and variable DIPEA ( $10^{-5}$  M)

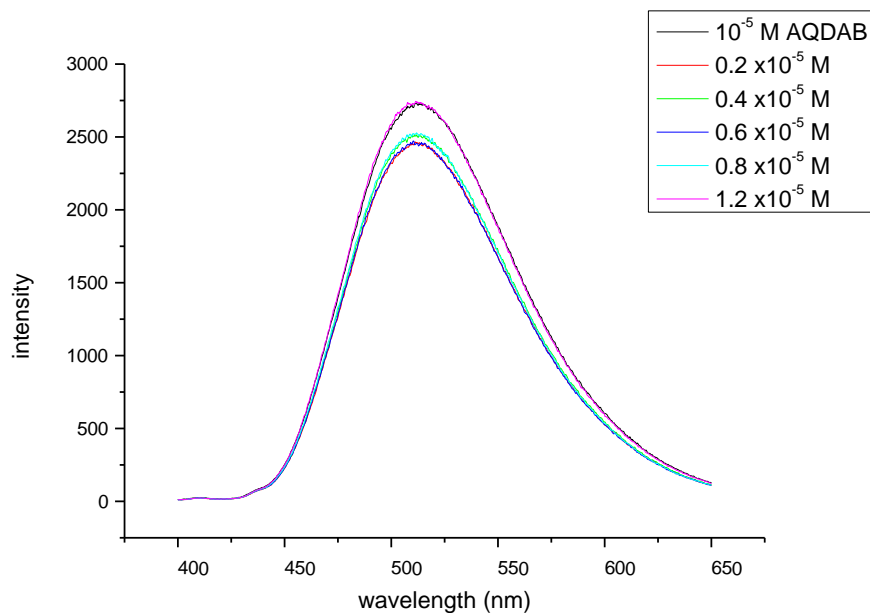

**Figure S10** Fluorescence quenching date with AQDAB (0.01 mM) and variable C<sub>12</sub>H<sub>25</sub>SH (10<sup>-5</sup> M)

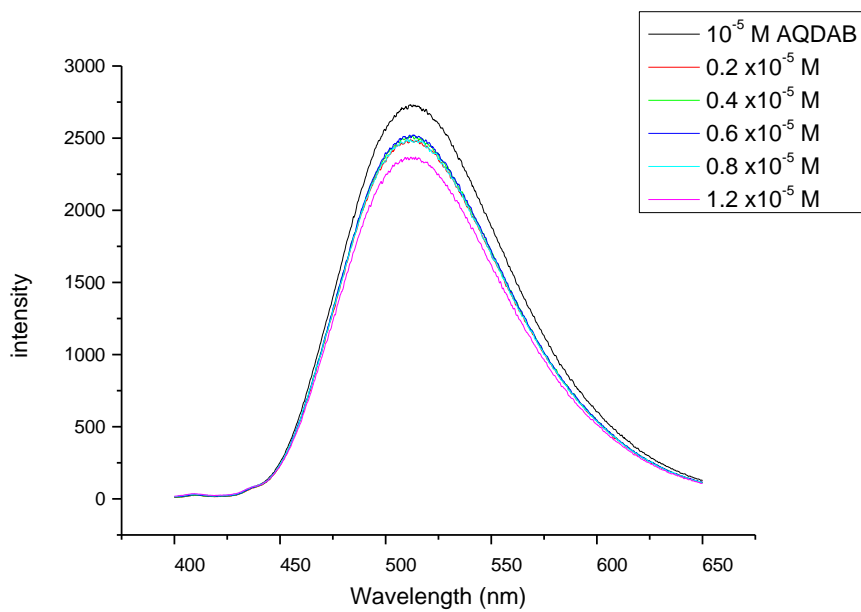

**Figure S11** Fluorescence quenching date with AQDAB (0.01 mM) and variable NiCl<sub>2</sub> (10<sup>-5</sup> M)

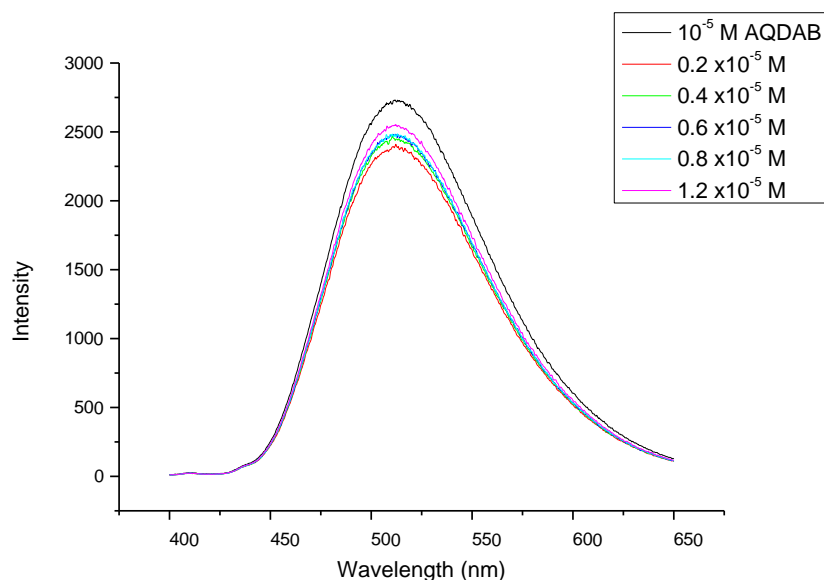

**Figure S12** Fluorescence quenching date with AQDAB (0.01 mM) and variable 4-bromobenzonitrile ( $10^{-5}$  M)

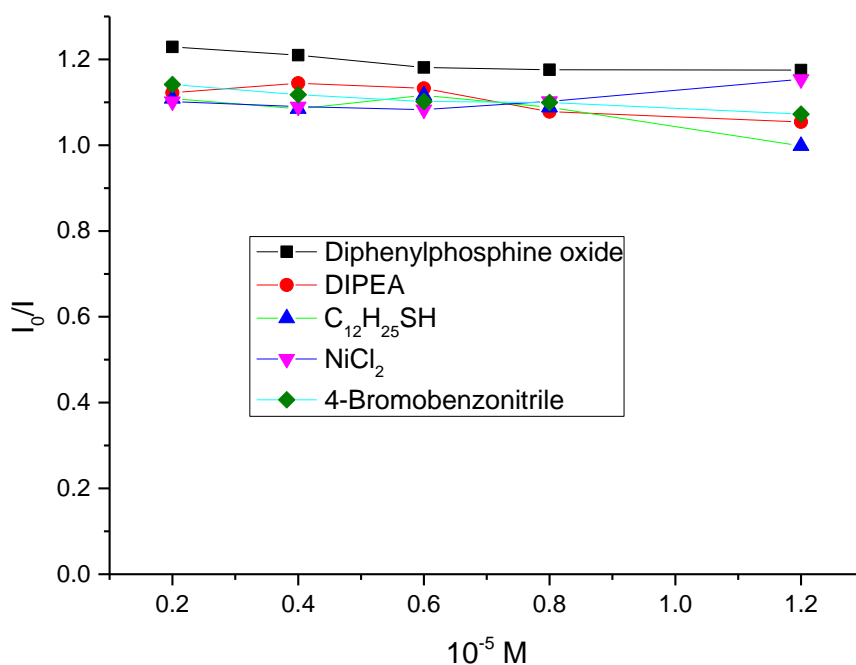

**Figure S13** Stern-Volmer plots of AQDAB (0.01 mM) and five quenchers.  $I_0$  and  $I$  were luminescence intensities in the absence and presence of the indicated concentrations ( $10^{-5}$  M) of the corresponding quencher, respectively. The solutions were irradiated at 387 nm and fluorescence was measured from 300 nm to 650 nm.

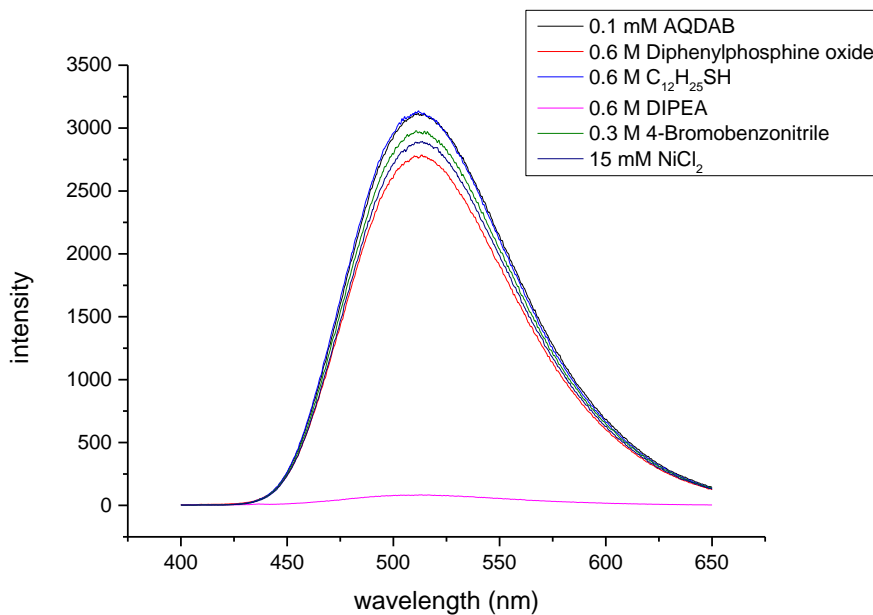

**Figure S14** Fluorescence quenching data with 0.1 mM AQDAB and five quenchers (0.6 M for the diphenylphosphine oxide, C<sub>12</sub>H<sub>25</sub>SH and DIPEA, 0.3 M for 4-bromobenzonitrile, and 15 mM for NiCl<sub>2</sub>).

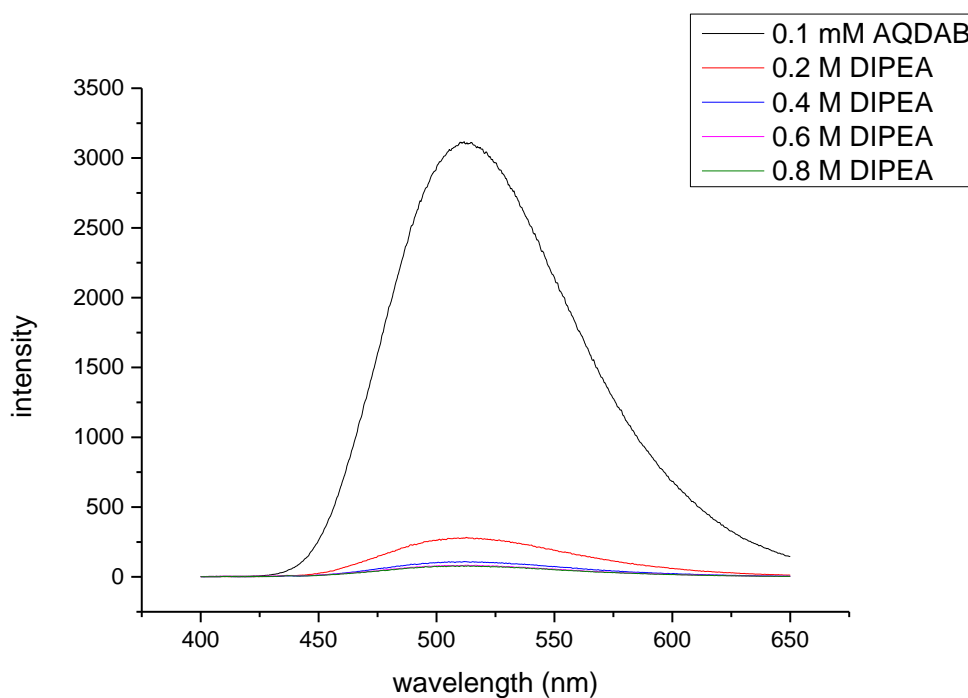

**Figure S15** Fluorescence quenching data with AQDAB (0.1 mM) and variable concentration of DIPEA



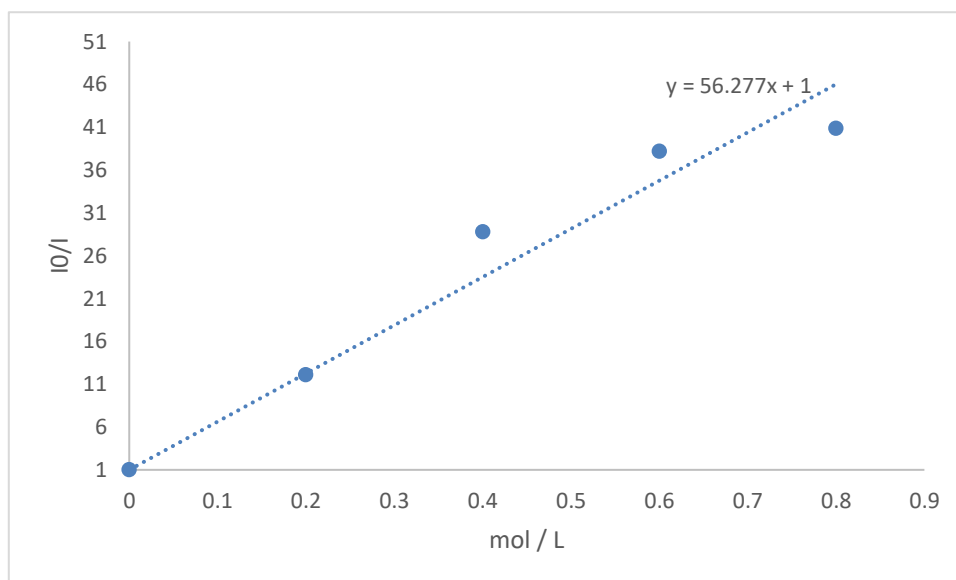

**Figure S16** Stern-Volmer plots of AQDAB (0.1 mM) and DIPEA as the quencher.  $I_0$  and  $I$  were luminescence intensities in the absence and presence of the indicated concentrations (mol / L) of the corresponding quencher, respectively.

The quenching phenomenon of DIPEA made us reconsider its function. DIPEA might function as a reductive quencher in the transformation. Based on this, an electron-transfer-based catalytic cycle and the corresponding description were shown below (**Scheme S2**).

After the photocatalyst (PC) was excited to PC\* under light, The excited photocatalyst was reduced by DIPEA, affording free radical cation DIPEA<sup>•+</sup>. The hydrogen of diphenylphosphine oxide was then transferred to DIPEA<sup>•+</sup>, generating the P-based radical. As for the nickel-catalyzed cycle, the oxidative addition of ArX onto the zero-valent L<sub>n</sub>Ni<sup>0</sup> (**A**) would generate L<sub>n</sub>Ni<sup>II</sup>(Ar)X (**B**). The combination of **B** and the P-radical then occurred to produce the Ni(III) species **C**, whose reductive elimination would form the desired product along with the one-valent nickel species **D**. Further reduction of **D** to **A** was then realized using PC<sup>•-</sup>, completing both the Ni-catalyzed and PC-catalyzed cycles.

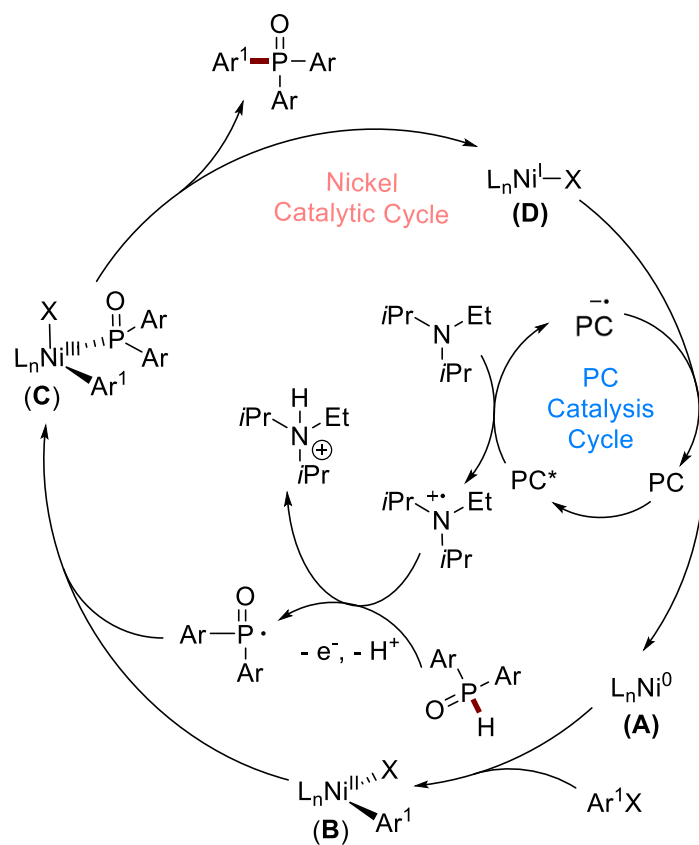

**Scheme S2** A possible mechanism via the electron transfer pathway

## 7. Characterization data

### (3aa) 4-(diphenylphosphoryl)benzonitrile (CAS: 5032-54-2)<sup>1</sup>

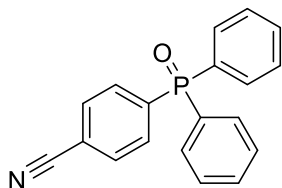

4-(diphenylphosphoryl)benzonitrile

Chemical Formula: C<sub>19</sub>H<sub>14</sub>NOP

Exact Mass: 303.0813

Molecular Weight: 303.3008

Following the General Procedure A with 4-bromobenzonitrile (54.6 mg, 0.3 mmol), diphenylphosphine oxide (120.7 mg, 0.6 mmol), **3aa** was obtained as colorless oil (56.5 mg, 62%).

Following the General Procedure A with 4-iodobenzonitrile (68.8 mg, 0.3 mmol), diphenylphosphine oxide (120.7 mg, 0.6 mmol), **3aa** was obtained as colorless oil (49.3 mg, 54%).

This target product was purified by acidic alumina flash chromatography (PE: EA: MeOH = 1:1:0.1).

<sup>1</sup>H NMR (400 MHz, CDCl<sub>3</sub>) δ 7.81 – 7.74 (m, 2H), 7.74 – 7.69 (m, 2H), 7.66 – 7.58 (m, 4H), 7.58 – 7.52 (m, 2H), 7.50 – 7.43 (m, 4H).

<sup>13</sup>C NMR (101 MHz, CDCl<sub>3</sub>) δ 138.5 (d, *J* = 99 Hz), 132.7, 132.6 (d, *J* = 2 Hz), 132.1 (d, *J* = 3 Hz), 131.9 (d, *J* = 1 Hz), 131.2 (d, *J* = 106 Hz), 128.8 (d, *J* = 12 Hz), 117.9 (d, *J* = 1 Hz), 115.6 (d, *J* = 3 Hz),.

<sup>31</sup>P NMR (162 MHz, CDCl<sub>3</sub>) δ 27.76.

### (3ba) (4-methoxyphenyl)diphenylphosphine oxide (CAS: 795-44-8)<sup>2</sup>

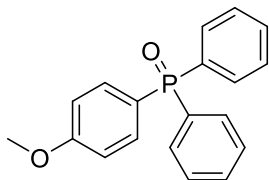

(4-methoxyphenyl)diphenylphosphine oxide

Chemical Formula: C<sub>19</sub>H<sub>17</sub>O<sub>2</sub>P

Exact Mass: 308.0966

Molecular Weight: 308.3168

Following the General Procedure A with 1-bromo-4-methoxybenzene (56.1 mg, 0.3 mmol), diphenylphosphine oxide (120.7 mg, 0.6 mmol), **3ba** was obtained as white solid (63.2 mg, 68%).

Following the General Procedure A with 4-iodoanisole (70.2 mg, 0.3 mmol), diphenylphosphine oxide (120.7 mg, 0.6 mmol), **3ba** was obtained as white solid (70.3 mg, 76%).

This target product was purified by acidic alumina flash chromatography (PE: EA = 1:3).

<sup>1</sup>H NMR (400 MHz, CDCl<sub>3</sub>) δ 7.68 – 7.61 (m, 4H), 7.61 – 7.54 (m, 2H), 7.54 – 7.48 (m, 2H), 7.47 – 7.39 (m, 4H), 6.98 – 6.92 (m, 2H), 3.82 (s, 3H).

<sup>13</sup>C NMR (101 MHz, CDCl<sub>3</sub>) δ 162.5 (d, *J* = 3 Hz), 134.0 (d, *J* = 11 Hz), 133.0 (d, *J* = 105 Hz), 132.1 (d, *J* = 10 Hz), 131.8 (d, *J* = 3 Hz), 128.5 (d, *J* = 12 Hz), 123.6 (d, *J* = 111 Hz), 114.1 (d, *J* = 13 Hz), 55.4.

<sup>31</sup>P NMR (162 MHz, CDCl<sub>3</sub>) δ 29.04.

### (3ca) diphenyl(*p*-tolyl)phosphine oxide (CAS: 6840-28-4)<sup>2</sup>

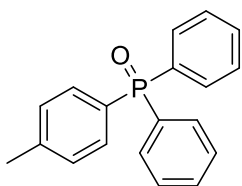

diphenyl(*p*-tolyl)phosphine oxide

Chemical Formula: C<sub>19</sub>H<sub>17</sub>OP

Exact Mass: 292.1017

Molecular Weight: 292.3178

Following the General Procedure A with 4-bromotoluene (51.3 mg, 0.3 mmol), diphenylphosphine oxide (120.7 mg, 0.6 mmol), **3ca** was obtained as white solid (50.4 mg, 58%).

Following the General Procedure A with 4-iodotoluene (65.4 mg, 0.3 mmol), diphenylphosphine oxide (120.7 mg, 0.6 mmol), **3ca** was obtained as white solid (47.1 mg, 54%).

This target product was purified by acidic alumina flash chromatography (PE: EA: MeOH = 1:1:0.1).

<sup>1</sup>H NMR (400 MHz, CDCl<sub>3</sub>) δ 7.71 – 7.62 (m, 4H), 7.59 – 7.49

(m, 4H), 7.48 - 7.40 (m, 4H), 7.30 - 7.23 (m, 2H), 2.39 (s, 3H).

$^{13}\text{C}$  NMR (101 MHz,  $\text{CDCl}_3$ )  $\delta$  142.5 (d,  $J = 3$  Hz), 132.8 (d,  $J = 104$  Hz), 132.1 (d,  $J = 10$  Hz), 132.1 (d,  $J = 10$  Hz), 131.8 (d,  $J = 3$  Hz), 129.3 (d,  $J = 13$  Hz), 129.2 (d,  $J = 107$  Hz), 128.5 (d,  $J = 12$  Hz), 21.6 (d,  $J = 1$  Hz).

$^{31}\text{P}$  NMR (162 MHz,  $\text{CDCl}_3$ )  $\delta$  29.20.

### (3da) triphenylphosphine oxide (CAS: 791-28-6)<sup>2</sup>

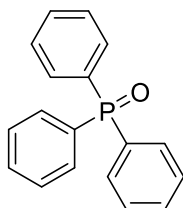

triphenylphosphine oxide

Chemical Formula:  $\text{C}_{18}\text{H}_{15}\text{OP}$

Exact Mass: 278.0861

Molecular Weight: 278.2908

Following the General Procedure A with bromobenzene (47.1 mg, 0.3 mmol), diphenylphosphine oxide (120.7 mg, 0.6 mmol), **3da** was obtained as white solid (41.9 mg, 50%).

Following the General Procedure A with iodobenzene (61.2 mg, 0.3 mmol), diphenylphosphine oxide (120.7 mg, 0.6 mmol), **3da** was obtained as white solid (47.3 mg, 57%).

This target product was purified by acidic alumina flash chromatography (PE: EA: MeOH = 1:1:0.1).

$^1\text{H}$  NMR (400 MHz,  $\text{CDCl}_3$ )  $\delta$  7.71 - 7.61 (m, 6H), 7.56 - 7.49 (m, 3H), 7.48 - 7.40 (m, 6H).

$^{13}\text{C}$  NMR (101 MHz,  $\text{CDCl}_3$ )  $\delta$  132.5 (d,  $J = 104$  Hz), 132.1 (d,  $J = 10$  Hz), 131.9 (d,  $J = 3$  Hz), 128.5 (d,  $J = 12$  Hz).

$^{31}\text{P}$  NMR (162 MHz,  $\text{CDCl}_3$ )  $\delta$  29.08.

### (3ea) (4-chlorophenyl)diphenylphosphine oxid (CAS: 34303-18-9)<sup>2</sup>

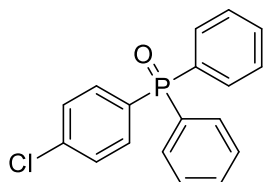

(4-chlorophenyl)diphenylphosphine oxide

Chemical Formula:  $\text{C}_{18}\text{H}_{14}\text{ClOP}$

Exact Mass: 312.0471

Molecular Weight: 312.7328

Following the General Procedure A with 1-bromo-4-chlorobenzene (57.4 mg, 0.3 mmol), diphenylphosphine oxide (120.7 mg, 0.6 mmol), **3ea** was obtained as white solid (32.9 mg, 35%).

Following the General Procedure A with 1-chloro-4-iodobenzene (71.5 mg, 0.3 mmol), diphenylphosphine oxide (120.7 mg, 0.6 mmol), **3ea** was obtained as white solid (72.7 mg, 78%).

This target product was purified by acidic alumina flash chromatography (PE: EA: MeOH = 1:1:0.1).

$^1\text{H}$  NMR (400 MHz,  $\text{CDCl}_3$ )  $\delta$  7.68 - 7.50 (m, 8H), 7.48 - 7.39 (m, 6H).

$^{13}\text{C}$  NMR (101 MHz,  $\text{CDCl}_3$ )  $\delta$  138.6 (d,  $J = 3$  Hz), 133.5 (d,  $J = 11$  Hz), 132.2 (d,  $J = 3$  Hz), 132.1 (d,  $J = 105$  Hz), 132.0 (d,  $J = 10$  Hz), 131.2 (d,  $J = 105$  Hz), 128.9 (d,  $J = 13$  Hz), 128.6 (d,  $J = 12$  Hz).

$^{31}\text{P}$  NMR (162 MHz,  $\text{CDCl}_3$ )  $\delta$  28.41.

**(3fa) ethyl 4-(diphenylphosphoryl)benzoate (CAS: 101630-35-7)<sup>3</sup>**

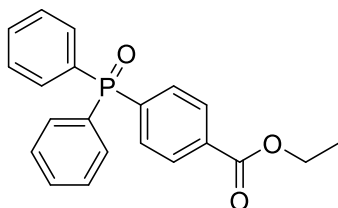

ethyl 4-(diphenylphosphoryl)benzoate  
Chemical Formula: C<sub>21</sub>H<sub>19</sub>O<sub>3</sub>P  
Exact Mass: 350.1072  
Molecular Weight: 350.3538

Following the General Procedure A with ethyl-4-bromobenzoate (68.7 mg, 0.3 mmol), diphenylphosphine oxide (120.7 mg, 0.6 mmol), **3fa** was obtained as colorless oil (67.6 mg, 64%).

Following the General Procedure A with ethyl-4-iodobenzoate (82.8 mg, 0.3 mmol), diphenylphosphine oxide (120.7 mg, 0.6 mmol), **3 / 1 a** was obtained as colorless oil (86.3 mg, 82%).

This target product was purified by acidic alumina flash chromatography (PE: EA = 1:3).

<sup>1</sup>H NMR (400 MHz, CDCl<sub>3</sub>) δ 8.16 – 8.10 (dd, *J* = 8.4, 2.4 Hz, 2H), 7.81 – 7.74 (m, 2H), 7.71 – 7.63 (m, 4H), 7.60 – 7.53 (m, 2H), 7.51 – 7.44 (m, 4H), 4.39 (q, *J* = 7.0 Hz, 2H), 1.39 (t, *J* = 7.0 Hz, 3H).

<sup>13</sup>C NMR (101 MHz, CDCl<sub>3</sub>) δ 165.7, 137.4 (d, *J* = 101 Hz), 133.6 (d, *J* = 3 Hz), 132.3 (d, *J* = 3 Hz), 132.2, 132.0 (d, *J* = 10 Hz), 131.8 (d, *J* = 104 Hz), 129.4 (d, *J* = 12 Hz), 128.7 (d, *J* = 12 Hz), 61.4, 14.3.

<sup>31</sup>P NMR (162 MHz, CDCl<sub>3</sub>) δ 28.48.

**(3ga) [1,1'-biphenyl]-4-ylidiphenylphosphine oxide (CAS: 1942-83-2)<sup>1</sup>**

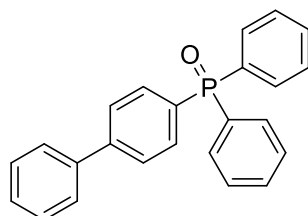

[1,1'-biphenyl]-4-ylidiphenylphosphine oxide  
Chemical Formula: C<sub>24</sub>H<sub>19</sub>OP  
Exact Mass: 354.1174  
Molecular Weight: 354.3888

Following the General Procedure A with 4-bromobiphenyl (69.9 mg, 0.3 mmol), diphenylphosphine oxide (120.7 mg, 0.6 mmol), **3ga** was obtained as white solid (79.5 mg, 75%).

This target product was purified by acidic alumina flash chromatography (PE: EA = 1:3).

Melting point (°C): 158.3-159.6.

<sup>1</sup>H NMR (400 MHz, CDCl<sub>3</sub>) δ 7.79 – 7.64 (m, 8H), 7.63 - 7.52 (m, 4H), 7.51 – 7.41 (m, 6H), 7.38 (t, *J* = 7.2 Hz, 1H).

<sup>13</sup>C NMR (101 MHz, CDCl<sub>3</sub>) δ 144.7 (d, *J* = 3 Hz), 139.9, 132.6 (d, *J* = 10 Hz), 132.5 (d, *J* = 105 Hz), 132.1 (d, *J* = 10 Hz), 132.09 (d, *J* = 3 Hz), 131.1 (d, *J* = 106 Hz), 129.0, 128.6 (d, *J* = 12 Hz), 127.3,

127.3, 127.1.

<sup>31</sup>P NMR (162 MHz, CDCl<sub>3</sub>) δ 28.97.

**(3ha) tert-butyl 4-(diphenylphosphoryl)benzoate**

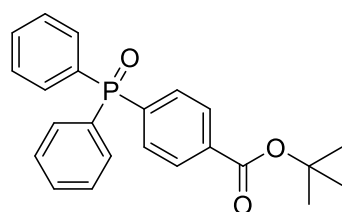

tert-butyl 4-(diphenylphosphoryl)benzoate  
Chemical Formula: C<sub>23</sub>H<sub>23</sub>O<sub>3</sub>P  
Exact Mass: 378.1385  
Molecular Weight: 378.4078

Following the General Procedure A with tert-butyl 4-bromobenzoate (77.1 mg, 0.3 mmol), diphenylphosphine oxide (120.7 mg, 0.6 mmol), **3ha** was obtained as white solid (80.6 mg, 71%).

This target product was purified by acidic alumina flash chromatography (PE: EA = 1:3).

Melting point (°C): 122.6-125.2.

<sup>1</sup>H NMR (400 MHz, CDCl<sub>3</sub>) δ 8.06 – 8.01 (m, 2H), 7.71 (dd, *J* = 11.6, 8.4 Hz, 2H), 7.66 – 7.58 (m, 4H), 7.55 – 7.48 (m, 2H), 7.46 – 7.39 (m, 4H), 1.55 (s, 9H).

<sup>13</sup>C NMR (101 MHz, CDCl<sub>3</sub>) δ 164.8, 137.5 (d, *J* = 101.6 Hz), 135.1 (d, *J* = 2.8 Hz), 132.0 (d, *J* = 105.0

Hz), 132.2 (d,  $J = 2.8$  Hz), 132.0 (d,  $J = 10.0$  Hz), 132.0 (d,  $J = 10.2$  Hz), 129.3 (d,  $J = 12.2$  Hz), 128.6 (d,  $J = 12.2$  Hz), 81.8, 28.1.

$^{31}\text{P}$  NMR (162 MHz,  $\text{CDCl}_3$ )  $\delta$  28.52.

IR ( $\text{cm}^{-1}$ ): 3422, 2980, 1710, 1300, 1188, 1110, 718, 547.

HRMS (ESI)  $m/z$  calcd for  $\text{C}_{23}\text{H}_{23}\text{O}_3\text{PNa}^+$  ( $\text{M}+\text{Na}$ ) $^+$  401.12770, found 401.12796.

### (3ia) (4-phenoxyphenyl)diphenylphosphine oxide (CAS: 2412926-10-2)<sup>4</sup>

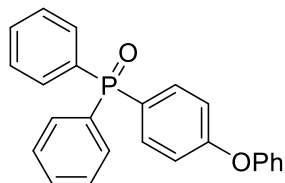

(4-phenoxyphenyl)diphenylphosphine oxide

Chemical Formula:  $\text{C}_{24}\text{H}_{19}\text{O}_2\text{P}$

Exact Mass: 370.1123

Molecular Weight: 370.3878

Following the General Procedure A with 1-bromo-4-phenoxybenzene (74.7 mg, 0.3 mmol), diphenylphosphine oxide (120.7 mg, 0.6 mmol), **3ia** was obtained as white solid (72.2 mg, 65%).

This target product was purified by acidic alumina flash chromatography (PE: EA = 1:3).

$^1\text{H}$  NMR (400 MHz,  $\text{CDCl}_3$ )  $\delta$  7.70 – 7.63 (m, 4H), 7.62 – 7.55 (m, 2H), 7.54 – 7.48 (m, 2H), 7.47 – 7.39 (m, 4H), 7.38 – 7.31 (m, 2H), 7.14 (t,  $J = 7.4$  Hz, 1H), 7.07 – 6.97 (m, 4H).

$^{13}\text{C}$  NMR (101 MHz,  $\text{CDCl}_3$ )  $\delta$  161.1 (d,  $J = 3.0$  Hz), 155.5,

134.1 (d,  $J = 11.2$  Hz), 132.7 (d,  $J = 104.9$  Hz), 132.1 (d,  $J = 10.0$  Hz), 131.9 (d,  $J = 2.8$  Hz), 130.1, 128.5 (d,  $J = 12.1$  Hz), 126.0 (d,  $J = 108.8$  Hz), 124.6, 120.2, 117.6 (d,  $J = 13.1$  Hz).

$^{31}\text{P}$  NMR (162 MHz,  $\text{CDCl}_3$ )  $\delta$  28.76.

### (3ja) 1-(4-(diphenylphosphoryl)phenyl)ethan-1-one (CAS: 5032-76-8)<sup>4</sup>

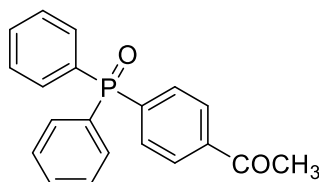

1-(4-(diphenylphosphoryl)phenyl)ethan-1-one

Chemical Formula:  $\text{C}_{20}\text{H}_{17}\text{O}_2\text{P}$

Exact Mass: 320.0966

Molecular Weight: 320.3278

Following the General Procedure A with 1-(4-bromophenyl)ethan-1-one (59.7 mg, 0.3 mmol), diphenylphosphine oxide (120.7 mg, 0.6 mmol), **3ja** was obtained as white solid (59.6 mg, 62%).

Following the General Procedure A with 1-(4-iodophenyl)ethan-1-one (73.8 mg, 0.3 mmol), diphenylphosphine oxide (120.7 mg, 0.6 mmol), **3ja** was obtained as colorless oil (73.1 mg, 76%).

This target product was purified by acidic alumina flash chromatography (PE: EA = 1:3).

$^1\text{H}$  NMR (400 MHz,  $\text{CDCl}_3$ )  $\delta$  8.04 – 7.98 (m, 2H), 7.80 – 7.74 (m, 2H), 7.68 – 7.60 (m, 4H), 7.58 – 7.52 (m, 2H), 7.49 – 7.43 (m, 4H), 2.61 (s, 3H).

$^{13}\text{C}$  NMR (101 MHz,  $\text{CDCl}_3$ )  $\delta$  197.5, 139.5 (d,  $J = 2.7$  Hz), 137.7 (d,  $J = 101$  Hz), 132.4 (d,  $J = 10.1$  Hz), 132.3 (d,  $J = 3.0$  Hz), 132.0 (d,  $J = 10.0$  Hz), 131.2, 128.7 (d,  $J = 12.2$  Hz), 128.1 (d,  $J = 12.1$  Hz), 26.8.

$^{31}\text{P}$  NMR (162 MHz,  $\text{CDCl}_3$ )  $\delta$  28.35.

**(3ka) (4-(tert-butyl)phenyl)diphenylphosphine oxide (CAS: 1448632-01-6)<sup>5</sup>**

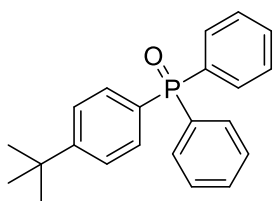

(4-(*tert*-butyl)phenyl)diphenylphosphine oxide

Chemical Formula: C<sub>22</sub>H<sub>23</sub>OP

Exact Mass: 334.1487

Molecular Weight: 334.3988

Following the General Procedure A with 1-(*tert*-butyl)-4-iodobenzene (78.0 mg, 0.3 mmol), diphenylphosphine oxide (120.7 mg, 0.6 mmol), **3ka** was obtained as white solid (63.2 mg, 63%).

This target product was purified by acidic alumina flash chromatography (PE: EA = 1:3).

<sup>1</sup>H NMR (400 MHz, CDCl<sub>3</sub>) δ 7.70 – 7.63 (m, 4H), 7.61 – 7.54 (m, 2H), 7.53 – 7.40 (m, 8H), 1.30 (s, 9H).

<sup>13</sup>C NMR (101 MHz, CDCl<sub>3</sub>) δ 155.4 (d, *J* = 2.8 Hz), 132.9 (d, *J* = 104.3 Hz), 132.1 (d, *J* = 9.7 Hz), 131.9, 131.8 (d, *J* = 2.7 Hz), 129.2 (d, *J* = 106.9 Hz), 128.4 (d, *J* = 12.1 Hz), 125.5 (d, *J* = 12.4

Hz), 35.0, 31.1.

<sup>31</sup>P NMR (162 MHz, CDCl<sub>3</sub>) δ 28.93.

**(3la) diphenyl(*m*-tolyl)phosphine oxide (CAS: 6840-27-3)<sup>6</sup>**

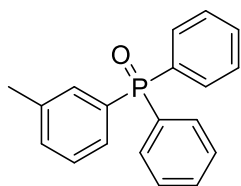

diphenyl(*m*-tolyl)phosphine oxide

Chemical Formula: C<sub>19</sub>H<sub>17</sub>OP

Exact Mass: 292.1017

Molecular Weight: 292.3178

Following the General Procedure A with 1-bromo-3-methylbenzene (51.3 mg, 0.3 mmol), diphenylphosphine oxide (120.7 mg, 0.6 mmol), **3la** was obtained as white solid (33.3 mg, 38%).

Following the General Procedure A with 1-iodo-3-methylbenzene (65.4 mg, 0.3 mmol), diphenylphosphine oxide (120.7 mg, 0.6 mmol), **3la** was obtained as white solid (48.2 mg, 55%).

This target product was purified by acidic alumina flash chromatography (PE: EA = 1:3).

<sup>1</sup>H NMR (400 MHz, CDCl<sub>3</sub>) δ 7.70 – 7.63 (m, 4H), 7.60 – 7.50 (m, 3H), 7.48 – 7.42 (m, 4H), 7.40 – 7.31 (m, 3H), 2.35 (s, 3H).

<sup>13</sup>C NMR (101 MHz, CDCl<sub>3</sub>) δ 138.5 (d, *J* = 12.0 Hz), 133.0 (d, *J* = 43.5 Hz), 132.8 (d, *J* = 2.9 Hz), 132.5 (d, *J* = 9.5 Hz), 132.1 (d, *J* = 9.9 Hz), 131.9 (d, *J* = 2.8 Hz), 131.8, 129.2 (d, *J* = 10.3 Hz), 128.5 (d, *J* = 12.1 Hz), 128.3 (d, *J* = 12.9 Hz), 21.4.

<sup>31</sup>P NMR (162 MHz, CDCl<sub>3</sub>) δ 29.27.

**(3ma) (3-methoxyphenyl)diphenylphosphine oxide (CAS: 95278-09-4)<sup>4</sup>**

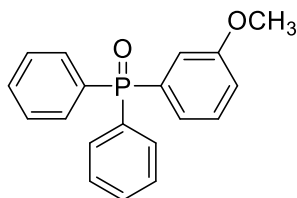

(3-methoxyphenyl)diphenylphosphine oxide

Chemical Formula: C<sub>19</sub>H<sub>17</sub>O<sub>2</sub>P

Exact Mass: 308.0966

Molecular Weight: 308.3168

Following the General Procedure A with 1-iodo-3-methoxybenzene (70.2 mg, 0.3 mmol), diphenylphosphine oxide (120.7 mg, 0.6 mmol), **3ma** was obtained as white solid (38.8 mg, 42%).

This target product was purified by acidic alumina flash chromatography (PE: EA = 1:3).

<sup>1</sup>H NMR (400 MHz, CDCl<sub>3</sub>) δ 7.70 – 7.62 (m, 4H), 7.57 – 7.50 (m, 2H), 7.49 – 7.41 (m, 4H), 7.38 – 7.32 (m, 1H), 7.31 – 7.24 (m, 1H), 7.17 – 7.10 (m, 1H), 7.09 – 7.03 (m, 1H), 3.78 (s, 3H).

<sup>13</sup>C NMR (101 MHz, CDCl<sub>3</sub>) δ 159.6 (d, *J* = 14.8 Hz), 133.9 (d, *J* = 103.6 Hz), 133.0, 132.1 (d, *J* = 9.9 Hz), 132.0 (d, *J* = 2.8 Hz), 129.7 (d, *J* = 14.4 Hz), 128.5 (d, *J* = 12.2 Hz), 124.4 (d, *J* = 10.0 Hz), 118.2

(d,  $J = 2.6$  Hz), 116.8 (d,  $J = 10.7$  Hz), 55.4.

$^{31}\text{P}$  NMR (162 MHz,  $\text{CDCl}_3$ )  $\delta$  29.37.

### (3na) (3-phenoxyphenyl)diphenylphosphine oxide

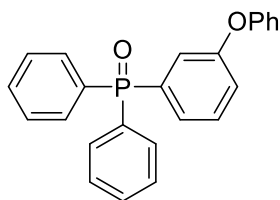

(3-phenoxyphenyl)diphenylphosphine  
oxide

Chemical Formula:  $\text{C}_{24}\text{H}_{19}\text{O}_2\text{P}$

Exact Mass: 370.1123

Molecular Weight: 370.3878

Following the General Procedure A with 1-bromo-3-phenoxybenzene (74.7 mg, 0.3 mmol), diphenylphosphine oxide (120.7 mg, 0.6 mmol), **3na** was obtained as yellow oil (76.7 mg, 69%).

This target product was purified by acidic alumina flash chromatography (PE: EA = 1:3).

$^1\text{H}$  NMR (400 MHz,  $\text{CDCl}_3$ )  $\delta$  7.72 – 7.63 (m, 4H), 7.57 – 7.49 (m, 2H), 7.49 – 7.42 (m, 4H), 7.41 – 7.38 (m, 1H), 7.37 – 7.34 (m, 1H), 7.34 – 7.26 (m, 3H), 7.15 – 7.06 (m, 2H), 7.00 – 6.94 (m, 2H).

$^{13}\text{C}$  NMR (101 MHz,  $\text{CDCl}_3$ )  $\delta$  157.6 (d,  $J = 15.5$  Hz), 156.3, 134.6 (d,  $J = 103.1$  Hz), 132.2 (d,  $J = 104.9$  Hz), 132.1, 132.0, 130.1 (d,  $J = 13.9$  Hz), 129.9, 128.6 (d,  $J = 12.2$  Hz), 126.6 (d,  $J = 9.6$  Hz), 123.9, 122.0 (d,  $J = 11.0$  Hz), 121.8 (d,  $J = 2.6$  Hz), 119.2.

$^{31}\text{P}$  NMR (162 MHz,  $\text{CDCl}_3$ )  $\delta$  28.74.

IR ( $\text{cm}^{-1}$ ): 3659, 3055, 1673, 1580, 1482, 1233, 1110, 908, 757, 698, 537.

HRMS (ESI)  $m/z$  calcd for  $\text{C}_{24}\text{H}_{19}\text{O}_2\text{PNa}^+$  ( $\text{M}+\text{Na}$ ) $^+$  393.1015, found 393.1011.

### (3oa) methyl 3-(diphenylphosphoryl)benzoate (CAS: 204930-15-4)<sup>7</sup>

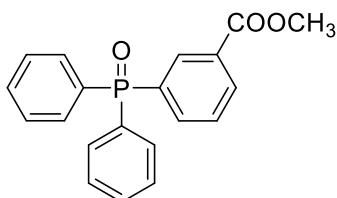

methyl 3-  
(diphenylphosphoryl)benzoate

Chemical Formula:  $\text{C}_{20}\text{H}_{17}\text{O}_3\text{P}$

Exact Mass: 336.0915

Molecular Weight: 336.3268

Following the General Procedure A with methyl 3-bromo benzoate (64.5 mg, 0.3 mmol), diphenylphosphine oxide (120.7 mg, 0.6 mmol), **3oa** was obtained as white solid (38.4 mg, 38%).

Following the General Procedure A with methyl 3-iodobenzoate (78.6 mg, 0.3 mmol), diphenylphosphine oxide (120.7 mg, 0.6 mmol), **3oa** was obtained as white solid (41.4 mg, 41%).

This target product was purified by acidic alumina flash chromatography (PE: EA = 1:3).

$^1\text{H}$  NMR (400 MHz,  $\text{CDCl}_3$ )  $\delta$  8.33 (dd,  $J = 12.0, 1.2$  Hz, 1H), 8.24 – 8.15 (m, 1H), 7.93 – 7.83 (m, 1H), 7.68 – 7.61 (m, 4H),

7.57 – 7.51 (m, 3H), 7.49 – 7.42 (m, 4H), 3.86 (s, 3H).

$^{13}\text{C}$  NMR (101 MHz,  $\text{CDCl}_3$ )  $\delta$  166.1, 136.2 (d,  $J = 9.8$  Hz), 133.5 (d,  $J = 103.5$  Hz), 133.0 (d,  $J = 14.5$  Hz), 132.9, 132.2 (d,  $J = 2.8$  Hz), 132.0 (d,  $J = 105.2$  Hz), 132.0 (d,  $J = 10.1$  Hz), 130.6 (d,  $J = 12.1$  Hz), 128.8 (d,  $J = 11.8$  Hz), 128.7 (d,  $J = 12.3$  Hz), 52.4.

$^{31}\text{P}$  NMR (162 MHz,  $\text{CDCl}_3$ )  $\delta$  28.28.



**(3pa) 1-(3-(diphenylphosphoryl)phenyl)ethan-1-one (CAS: 50777-54-3)<sup>8</sup>**

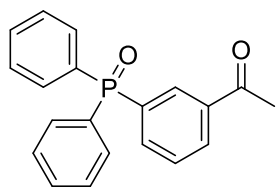

**1-(3-(diphenylphosphoryl)phenyl)ethan-1-one**

Chemical Formula: C<sub>20</sub>H<sub>17</sub>O<sub>2</sub>P

Exact Mass: 320.0966

Molecular Weight: 320.3278

Following the General Procedure A with 1-(3-bromophenyl)ethan-1-one (59.7 mg, 0.3 mmol), diphenylphosphine oxide (120.7 mg, 0.6 mmol), **3pa** was obtained as white solid (44.2 mg, 46%).

Following the General Procedure A with 1-(3-iodophenyl)ethan-1-one (73.8 mg, 0.3 mmol), diphenylphosphine oxide (120.7 mg, 0.6 mmol), **3pa** was obtained as white solid (43.2 mg, 45%).

This target product was purified by acidic alumina flash chromatography (PE: EA = 1:3).

<sup>1</sup>H NMR (400 MHz, CDCl<sub>3</sub>) δ 8.28 (d, *J* = 12.4 Hz, 1H), 8.11 (dd, *J* = 7.8, 1.4 Hz, 1H), 7.86 – 7.77 (m, 1H), 7.70 – 7.60 (m, 4H), 7.58 – 7.51 (m, 3H), 7.49 – 7.43 (m, 4H), 2.56 (s, 3H).

<sup>13</sup>C NMR (101 MHz, CDCl<sub>3</sub>) δ 197.2, 137.2 (d, *J* = 11.0 Hz), 136.3 (d, *J* = 10.1 Hz), 133.6 (d, *J* = 103.1 Hz), 131.9 (d, *J* = 105.3 Hz), 132.3 (d, *J* = 2.8 Hz), 132.0 (d, *J* = 10.1 Hz), 131.9 (d, *J* = 10.2 Hz), 131.5 (d, *J* = 2.6 Hz), 128.9 (d, *J* = 11.9 Hz), 128.7 (d, *J* = 12.3 Hz), 26.71.

<sup>31</sup>P NMR (162 MHz, CDCl<sub>3</sub>) δ 28.51.

**(3qa) diphenyl(*o*-tolyl)phosphine oxide (CAS: 6840-26-2)<sup>5</sup>**

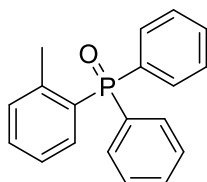

**diphenyl(*o*-tolyl)phosphine oxide**

Chemical Formula: C<sub>19</sub>H<sub>17</sub>OP

Exact Mass: 292.1017

Molecular Weight: 292.3178

Following the General Procedure A with 1-bromo-2-methylbenzene (51.3 mg, 0.3 mmol), diphenylphosphine oxide (120.7 mg, 0.6 mmol), **3qa** was obtained as yellow solid (22.5 mg, 26%).

Following the General Procedure A with 1-iodo-2-methylbenzene (65.4 mg, 0.3 mmol), diphenylphosphine oxide (120.7 mg, 0.6 mmol), **3qa** was obtained as white solid (32.9 mg, 38%).

This target product was purified by acidic alumina flash chromatography (PE: EA = 1:3).

<sup>1</sup>H NMR (400 MHz, CDCl<sub>3</sub>) δ 7.69 – 7.60 (m, 4H), 7.57 – 7.50 (m, 2H), 7.50 – 7.38 (m, 5H), 7.30 – 7.25 (m, 1H), 7.16 – 7.08 (m, 1H),

7.02 (dd, *J* = 14.0, 7.6 Hz, 1H), 2.45 (s, 3H).

<sup>13</sup>C NMR (101 MHz, CDCl<sub>3</sub>) δ 143.3 (d, *J* = 8.1 Hz), 133.5 (d, *J* = 12.9 Hz), 132.8 (d, *J* = 103.8 Hz), 132.1 (d, *J* = 2.6 Hz), 132.0, 131.9, 131.8 (d, *J* = 2.8 Hz), 130.8 (d, *J* = 103.3 Hz), 128.6 (d, *J* = 12.1 Hz), 125.2 (d, *J* = 12.9 Hz), 21.7 (d, *J* = 4.7 Hz).

<sup>31</sup>P NMR (162 MHz, CDCl<sub>3</sub>) δ 31.66.

**(3ra) methyl 2-(diphenylphosphoryl)benzoate (CAS: 79317-63-8)<sup>7</sup>**

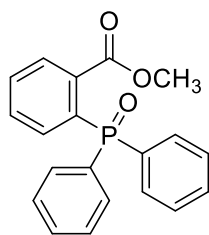

methyl 2-  
(diphenylphosphoryl)benzoate  
Chemical Formula: C<sub>20</sub>H<sub>17</sub>O<sub>3</sub>P  
Exact Mass: 336.0915  
Molecular Weight: 336.3268

Following the General Procedure A with methyl 2-bromobenzoate (64.5 mg, 0.3 mmol), diphenylphosphine oxide (120.7 mg, 0.6 mmol), **3ra** was obtained as white solid (35.3 mg, 35%).

Following the General Procedure A with methyl 2-iodobenzoate (78.6 mg, 0.3 mmol), diphenylphosphine oxide (120.7 mg, 0.6 mmol), **3ra** was obtained as white solid (27.2 mg, 27%).

This target product was purified by acidic alumina flash chromatography (PE: EA = 1:3).

<sup>1</sup>H NMR (400 MHz, CDCl<sub>3</sub>) δ 7.92 – 7.86 (m, 1H), 7.71 – 7.58 (m, 5H), 7.57 – 7.40 (m, 8H), 3.48 (s, 3H).

<sup>13</sup>C NMR (101 MHz, CDCl<sub>3</sub>) δ 167.7 (d, *J* = 3.0 Hz), 136.0 (d, *J* = 6.2 Hz), 134.7 (d, *J* = 10.6 Hz), 133.3 (d, *J* = 108.3 Hz), 132.9, 131.8 (d, *J* = 2.5 Hz), 131.7 (d, *J* = 10.0 Hz), 131.6, 130.9 (d, *J* = 11.8 Hz), 130.5 (d, *J* = 8.5 Hz), 128.4 (d, *J* = 12.4 Hz), 52.2.

<sup>31</sup>P NMR (162 MHz, CDCl<sub>3</sub>) δ 30.87.

**(3sa) diphenyl(2-(trifluoromethoxy)phenyl)phosphine oxide (CAS: 2242839-53-6)**

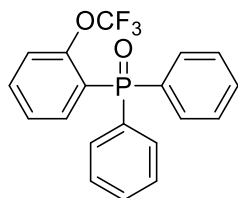

diphenyl(2-  
(trifluoromethoxy)phenyl)phosphine  
oxide

Chemical Formula: C<sub>19</sub>H<sub>14</sub>F<sub>3</sub>O<sub>2</sub>P  
Exact Mass: 362.0684  
Molecular Weight: 362.2880

Following the General Procedure A with 1-iodo-2-(trifluoromethoxy)benzene (86.4 mg, 0.3 mmol), diphenylphosphine oxide (120.7 mg, 0.6 mmol), **3sa** was obtained as yellow solid (44.8 mg, 42%).

This target product was purified by acidic alumina flash chromatography (PE: EA = 1:3).

Melting point (°C): 113.1-114.5.

<sup>1</sup>H NMR (400 MHz, CDCl<sub>3</sub>) δ 7.93 (ddd, *J* = 9.2, 7.6, 1.6 Hz, 1H), 7.76 – 7.66 (m, 4H), 7.62 – 7.50 (m, 3H), 7.50 – 7.41 (m, 4H), 7.37 (t, *J* = 7.6 Hz, 1H), 7.32 – 7.25 (m, 1H).

<sup>13</sup>C NMR (101 MHz, CDCl<sub>3</sub>) δ 150.6, 135.5 (d, *J* = 6.5 Hz), 134.2 (d, *J* = 1.7 Hz), 131.9 (d, *J* = 108.7 Hz), 132.1 (d, *J* = 2.8 Hz), 131.8 (d, *J* = 10.3 Hz), 128.5 (d, *J* = 12.6 Hz), 126.0 (d, *J* = 10.8 Hz), 124.3 (d, *J* = 99.6 Hz), 119.9 (d, *J* = 261.6 Hz), 117.8 (dd, *J* = 5.5, 2.4 Hz).

<sup>19</sup>F NMR (376 MHz, CDCl<sub>3</sub>) δ -56.29.

<sup>31</sup>P NMR (162 MHz, CDCl<sub>3</sub>) δ 25.22.

IR (cm<sup>-1</sup>): 3063, 1588, 1439, 1263, 1210, 1167, 1120, 708, 547.

HRMS (ESI) *m/z* calcd for C<sub>19</sub>H<sub>14</sub>F<sub>3</sub>O<sub>2</sub>PNa<sup>+</sup> (M+Na)<sup>+</sup> 385.0576, found 385.0576.

**(3ta) (E)-diphenyl(styryl)phosphine oxide (CAS: 3582-82-9)<sup>9</sup>**

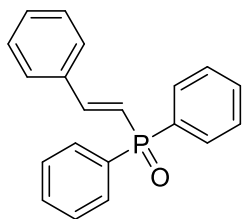

(E)-diphenyl(styryl)phosphine oxide  
Chemical Formula: C<sub>20</sub>H<sub>17</sub>OP  
Exact Mass: 304.1017  
Molecular Weight: 304.3288

<sup>1</sup>H NMR (400 MHz, CDCl<sub>3</sub>) δ 7.80 – 7.72 (m, 4H), 7.57 – 7.44 (m, 9H), 7.39 – 7.34 (m, 3H), 6.84 (dd, 22.0, 17.6 Hz, 1H).

<sup>31</sup>P NMR (162 MHz, CDCl<sub>3</sub>) δ 24.43.

Following the General Procedure A with beta-bromostyrene (54.9 mg, 0.3 mmol), diphenylphosphine oxide (120.7 mg, 0.6 mmol), **3ta** was obtained as white solid (47.0 mg, 52%).

This target product was purified by acidic alumina flash chromatography (PE: EA: MeOH = 1:1:0.1).

<sup>13</sup>C NMR (101 MHz, CDCl<sub>3</sub>) δ 147.6 (d, *J* = 4 Hz), 135.1 (d, *J* = 18 Hz), 133.0 (d, *J* = 106 Hz), 131.9 (d, *J* = 3 Hz), 131.4 (d, *J* = 10 Hz), 130.1, 128.9, 128.7 (d, *J* = 12 Hz), 127.8, 119.3 (d, *J* = 105 Hz).

**(3ua) (4-(diphenylamino)phenyl)diphenylphosphine oxide (CAS: 887651-41-4)<sup>2</sup>**

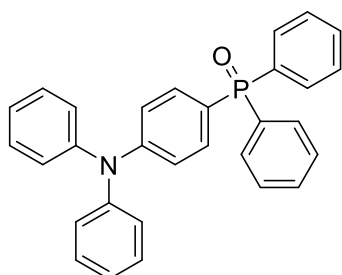

(4-(diphenylamino)phenyl)diphenyl phosphine oxide  
Chemical Formula: C<sub>30</sub>H<sub>24</sub>NOP  
Exact Mass: 445.1596  
Molecular Weight: 445.5018

<sup>1</sup>H NMR (400 MHz, CDCl<sub>3</sub>) δ 7.74 – 7.66 (m, 4H), 7.54 – 7.47 (m, 2H), 7.47 – 7.39 (m, 6H), 7.27 (t, *J* = 8.0 Hz, 4H), 7.13 (d, *J* = 7.6 Hz, 4H), 7.08 (t, *J* = 7.4 Hz, 2H), 7.01 (dd, *J* = 8.8, 2.4 Hz, 2H).

<sup>31</sup>P NMR (162 MHz, CDCl<sub>3</sub>) δ 29.02.

Following the General Procedure A with 4-bromotriphenylamine (97.3 mg, 0.3 mmol), diphenylphosphine oxide (120.7 mg, 0.6 mmol), **3ua** was obtained as white solid (98.8 mg, 74%).

This target product was purified by acidic alumina flash chromatography (PE: EA = 1:3).

Melting point (°C): 55.2-56.5.

<sup>13</sup>C NMR (101 MHz, CDCl<sub>3</sub>) δ 151.1 (d, *J* = 3 Hz), 146.6, 133.2 (d, *J* = 11 Hz), 133.0 (d, *J* = 105 Hz), 132.1 (d, *J* = 10 Hz), 131.8 (d, *J* = 3 Hz), 129.5, 128.4 (d, *J* = 12 Hz), 125.8, 124.5, 123.1 (d, *J* = 111 Hz), 120.2 (d, *J* = 13 Hz).

**(3va) diphenyl(pyridin-2-yl)phosphine oxide (CAS: 64741-30-6)<sup>8</sup>**

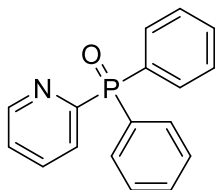

diphenyl(pyridin-2-yl)phosphine oxide  
Chemical Formula: C<sub>17</sub>H<sub>14</sub>NOP  
Exact Mass: 279.0813  
Molecular Weight: 279.2788

<sup>1</sup>H NMR (400 MHz, CDCl<sub>3</sub>) δ 8.76 (d, *J* = 4.6 Hz, 1H), 8.33 – 8.25 (m, 1H), 7.92 – 7.80 (m, 5H), 7.52 – 7.47 (m, 2H), 7.46 – 7.40 (m, 4H), 7.39 – 7.34 (m, 1H).

<sup>13</sup>C NMR (101 MHz, CDCl<sub>3</sub>) δ 156.4 (d, *J* = 132.4 Hz), 150.2 (d, *J* = 19.2 Hz), 136.2 (d, *J* = 9.3 Hz), 132.2 (d, *J* = 104.5 Hz), 132.1 (d, *J* = 9.5 Hz), 131.9 (d, *J* = 2.8 Hz), 128.4 (d, *J* = 19.9 Hz), 128.4 (d, *J* = 12.2 Hz), 125.3 (d, *J* = 3.1 Hz).

Following the General Procedure A with 2-bromopyridine (47.4 mg, 0.3 mmol), diphenylphosphine oxide (120.7 mg, 0.6 mmol), **3va** was obtained as white solid (43.5 mg, 52%).

This target product was purified by acidic alumina flash chromatography (PE: EA = 1:3).

<sup>13</sup>C NMR (101 MHz, CDCl<sub>3</sub>) δ 156.4 (d, *J* = 132.4 Hz), 150.2 (d, *J* = 19.2 Hz), 136.2 (d, *J* = 9.3 Hz), 132.2 (d, *J* = 104.5 Hz), 132.1 (d, *J* = 9.5 Hz), 131.9 (d, *J* = 2.8 Hz), 128.4 (d, *J* = 19.9 Hz), 128.4 (d, *J* = 12.2 Hz), 125.3 (d, *J* = 3.1 Hz).

$^{31}\text{P}$  NMR (162 MHz,  $\text{CDCl}_3$ )  $\delta$  20.83.

**(3wa) diphenyl(2-(trifluoromethyl)pyridin-4-yl)phosphine oxide**

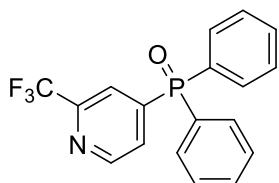

diphenyl(2-(trifluoromethyl)pyridin-4-yl)phosphine oxide

Chemical Formula:  $\text{C}_{18}\text{H}_{13}\text{F}_3\text{NOP}$

Exact Mass: 347.0687

Molecular Weight: 347.2770

Following the General Procedure A with 2-(trifluoromethyl)-4-bromopyridine (67.8 mg, 0.3 mmol), diphenylphosphine oxide (120.7 mg, 0.6 mmol), **3wa** was obtained as white solid (64.7 mg, 62%).

This target product was purified by acidic alumina flash chromatography (PE: EA = 1:3).

Melting point ( $^{\circ}\text{C}$ ): 138.5-140.0.

$^1\text{H}$  NMR (400 MHz,  $\text{CDCl}_3$ )  $\delta$  8.83 (t,  $J = 4.2$  Hz, 1H), 7.98 (d,  $J = 11.6$  Hz, 1H), 7.73 – 7.57 (m, 7H), 7.54 – 7.47 (m, 4H).

$^{13}\text{C}$  NMR (101 MHz,  $\text{CDCl}_3$ )  $\delta$  150.1 (d,  $J = 10$  Hz), 148.8 (qd,  $J = 35, 10$  Hz), 144.5 (d,  $J = 94$  Hz), 133.0 (d,  $J = 3$  Hz), 131.9 (d,  $J = 10$  Hz), 129.6 (d,  $J = 107$  Hz), 129.1 (d,  $J = 12$  Hz), 128.6 (d,  $J = 8$  Hz), 122.4 (dq,  $J = 9, 3$  Hz), 121.7 (qd,  $J = 272, 3$  Hz).

$^{19}\text{F}$  NMR (376 MHz,  $\text{CDCl}_3$ )  $\delta$  -67.99.

$^{31}\text{P}$  NMR (162 MHz,  $\text{CDCl}_3$ )  $\delta$  26.08.

IR ( $\text{cm}^{-1}$ ): 3056, 3027, 1436, 1333, 1201, 1136, 683, 533.

HRMS (ESI)  $m/z$  calcd for  $\text{C}_{18}\text{H}_{14}\text{F}_3\text{NOP}^+$  ( $\text{M}+\text{H}$ ) $^+$  348.0760, found 348.0761.

**(3xa) (6-methoxy-5-(trifluoromethyl)pyridin-3-yl)diphenylphosphine oxide**

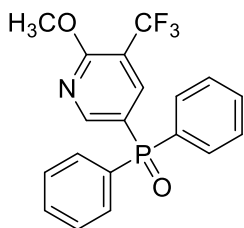

(6-methoxy-5-(trifluoromethyl)pyridin-3-yl)diphenylphosphine oxide

Chemical Formula:  $\text{C}_{19}\text{H}_{15}\text{F}_3\text{NO}_2\text{P}$

Exact Mass: 377.0792

Molecular Weight: 377.3030

Following the General Procedure A with 5-bromo-2-methoxy-3-(trifluoromethyl)pyridine (78.4 mg, 0.3 mmol), diphenylphosphine oxide (120.7 mg, 0.6 mmol), **3xa** was obtained as white solid (60.6 mg, 54%).

This target product was purified by acidic alumina flash chromatography (PE: EA = 1:3).

Melting point ( $^{\circ}\text{C}$ ): 69.9-71.1.

$^1\text{H}$  NMR (400 MHz,  $\text{CDCl}_3$ )  $\delta$  8.41 (dd,  $J = 6.0, 2.0$  Hz, 1H), 8.16 (dd,  $J = 10.4, 1.6$  Hz, 1H), 7.70 – 7.61 (m, 4H), 7.60 – 7.53 (m, 2H), 7.52 – 7.43 (m, 4H), 4.05 (s, 3H).

$^{13}\text{C}$  NMR (101 MHz,  $\text{CDCl}_3$ )  $\delta$  162.9, 154.5 (d,  $J = 13.1$  Hz), 139.7 (dd,  $J = 10.1, 4.8$  Hz), 132.6 (d,  $J = 2.8$  Hz), 131.9 (d,  $J = 10.2$  Hz), 131.4 (d,  $J = 107.3$  Hz), 128.9 (d,  $J = 12.4$  Hz), 123.8, 121.1, 121.1 (d,  $J = 106.7$  Hz), 54.8.

$^{19}\text{F}$  NMR (376 MHz,  $\text{CDCl}_3$ )  $\delta$  -64.09.

$^{31}\text{P}$  NMR (162 MHz,  $\text{CDCl}_3$ )  $\delta$  25.80.

IR ( $\text{cm}^{-1}$ ): 3412, 3029, 2916, 2229, 1600, 1404, 1186, 1127, 847, 694, 578.

HRMS (ESI)  $m/z$  calcd for  $\text{C}_{19}\text{H}_{15}\text{F}_3\text{NO}_2\text{PNa}^+$  ( $\text{M}+\text{Na}$ ) $^+$  400.06847, found 400.06854.

**(3ya) (1-methyl-1H-indol-5-yl)diphenylphosphine oxide**

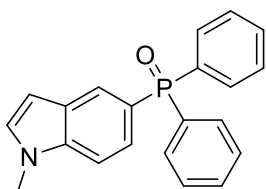

(1-methyl-1*H*-indol-5-yl)diphenylphosphine oxide  
Chemical Formula: C<sub>21</sub>H<sub>18</sub>NOP  
Exact Mass: 331.1126  
Molecular Weight: 331.3548

<sup>1</sup>H NMR (400 MHz, CDCl<sub>3</sub>) δ 7.90 (d, *J* = 13.2 Hz, 1H), 7.72 – 7.64 (m, 4H), 7.53 – 7.47 (m, 3H), 7.44 – 7.35 (m, 5H), 7.09 (d, *J* = 3.2 Hz, 1H), 6.48 (d, *J* = 2.8 Hz, 1H), 3.77 (s, 3H).

<sup>13</sup>C NMR (101 MHz, CDCl<sub>3</sub>) δ 138.4 (d, *J* = 3 Hz), 133.5 (d, *J* = 104 Hz), 132.2 (d, *J* = 10 Hz), 131.7 (d, *J* = 3 Hz), 130.3, 128.4 (d, *J* = 12 Hz), 126.4 (d, *J* = 12 Hz), 124.6 (d, *J* = 12 Hz), 121.5 (d, *J* = 110 Hz), 109.6 (d, *J* = 14 Hz), 102.2, 33.0.

<sup>31</sup>P NMR (162 MHz, CDCl<sub>3</sub>) δ 31.43.

IR (cm<sup>-1</sup>): 3102, 2914, 1436, 1324, 1173, 1166, 706, 505.

HRMS (ESI) *m/z* calcd for C<sub>21</sub>H<sub>19</sub>NOP<sup>+</sup> (*M*+*H*)<sup>+</sup> 332.1199, found 332.1201.

Following the General Procedure A with 5-bromo-1-methyl-1*H*-indole (63.0 mg, 0.3 mmol), diphenylphosphine oxide (120.7 mg, 0.6 mmol), **3ya** was obtained as yellow solid (71.0 mg, 71%).

This target product was purified by acidic alumina flash chromatography (PE: EA = 1:2).

Melting point (°C): 181.2-183.0.

<sup>1</sup>H NMR (400 MHz, CDCl<sub>3</sub>) δ 7.90 (d, *J* = 13.2 Hz, 1H), 7.72 – 7.64 (m, 4H), 7.53 – 7.47 (m, 3H), 7.44 – 7.35 (m, 5H), 7.09 (d, *J* = 3.2 Hz, 1H), 6.48 (d, *J* = 2.8 Hz, 1H), 3.77 (s, 3H).

<sup>13</sup>C NMR (101 MHz, CDCl<sub>3</sub>) δ 138.4 (d, *J* = 3 Hz), 133.5 (d, *J* = 104 Hz), 132.2 (d, *J* = 10 Hz), 131.7 (d, *J* = 3 Hz), 130.3, 128.4 (d, *J* = 12 Hz), 126.4 (d, *J* = 12 Hz), 124.6 (d, *J* = 12 Hz), 121.5 (d, *J* = 110 Hz), 109.6 (d, *J* = 14 Hz), 102.2, 33.0.

<sup>31</sup>P NMR (162 MHz, CDCl<sub>3</sub>) δ 31.43.

IR (cm<sup>-1</sup>): 3102, 2914, 1436, 1324, 1173, 1166, 706, 505.

HRMS (ESI) *m/z* calcd for C<sub>21</sub>H<sub>19</sub>NOP<sup>+</sup> (*M*+*H*)<sup>+</sup> 332.1199, found 332.1201.

**(3za) phenanthren-9-yl)diphenylphosphine oxide (CAS: 401798-09-2)<sup>10</sup>**

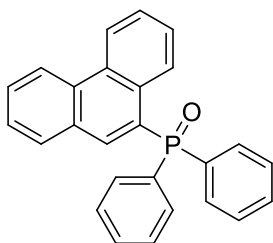

phenanthren-9-yl)diphenylphosphine oxide  
Chemical Formula: C<sub>26</sub>H<sub>19</sub>OP  
Exact Mass: 378.1174  
Molecular Weight: 378.4108

123.1, 122.7.

<sup>31</sup>P NMR (162 MHz, CDCl<sub>3</sub>) δ 32.64.

Following the General Procedure A with 9-bromophenanthrene (77.1 mg, 0.3 mmol), diphenylphosphine oxide (120.7 mg, 0.6 mmol), **3za** was obtained as white solid (56.8 mg, 50%).

This target product was purified by acidic alumina flash chromatography (PE: EA = 1:3).

<sup>1</sup>H NMR (400 MHz, CDCl<sub>3</sub>) δ 8.74 – 8.60 (m, 3H), 7.79 – 7.43 (m, 16H).

<sup>13</sup>C NMR (101 MHz, CDCl<sub>3</sub>) δ 136.9 (d, *J* = 11.3 Hz), 133.2, 132.2 (d, *J* = 9.8 Hz), 132.2, 132.0 (d, *J* = 2.7 Hz), 131.0 (d, *J* = 8.4 Hz), 130.8 (d, *J* = 8.5 Hz), 130.1, 129.70 (d, *J* = 14.8 Hz), 129.2, 128.8, 128.7, 128.6, 127.9 (d, *J* = 102.3 Hz), 127.2 (d, *J* = 5.8 Hz), 127.1,

123.1, 122.7.

<sup>31</sup>P NMR (162 MHz, CDCl<sub>3</sub>) δ 32.64.

**(3zb) diphenyl(pyren-1-yl)phosphine oxide (CAS: 2260821-57-4)<sup>11</sup>**

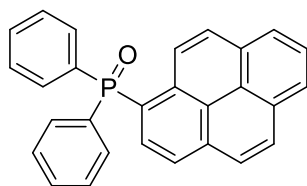

diphenyl(pyren-1-yl)phosphine oxide  
Chemical Formula: C<sub>28</sub>H<sub>19</sub>OP  
Exact Mass: 402.1174  
Molecular Weight: 402.4328

<sup>1</sup>H NMR (400 MHz, CDCl<sub>3</sub>) δ 8.96 (d, *J* = 9.3 Hz, 1H), 8.23 – 8.11 (m, 3H), 8.09 – 7.97 (m, 4H), 7.79 – 7.68 (m, 5H), 7.58 – 7.51 (m, 2H), 7.50 – 7.42 (m, 4H).

<sup>13</sup>C NMR (101 MHz, CDCl<sub>3</sub>) δ 134.3 (d, *J* = 2.5 Hz), 134.2 (d, *J* = 8.1 Hz), 133.3 (d, *J* = 104.7 Hz), 132.2 (d, *J* = 9.8 Hz), 132.0 (d, *J* = 2.7 Hz), 131.2 (d, *J* = 12.3 Hz), 131.0, 130.4, 129.4 (d, *J* = 95.5 Hz), 128.7 (d, *J* = 12.2 Hz), 127.1, 126.5, 126.3 (d, *J* = 6.6 Hz),

Following the General Procedure A with 1-bromopyrene (84.3 mg, 0.3 mmol), diphenylphosphine oxide (120.7 mg, 0.6 mmol), **3zb** was obtained as white solid (66.4 mg, 55%).

This target product was purified by acidic alumina flash chromatography (PE: EA = 1:3).

<sup>1</sup>H NMR (400 MHz, CDCl<sub>3</sub>) δ 8.96 (d, *J* = 9.3 Hz, 1H), 8.23 – 8.11 (m, 3H), 8.09 – 7.97 (m, 4H), 7.79 – 7.68 (m, 5H), 7.58 – 7.51 (m, 2H), 7.50 – 7.42 (m, 4H).

<sup>13</sup>C NMR (101 MHz, CDCl<sub>3</sub>) δ 134.3 (d, *J* = 2.5 Hz), 134.2 (d, *J* = 8.1 Hz), 133.3 (d, *J* = 104.7 Hz), 132.2 (d, *J* = 9.8 Hz), 132.0 (d, *J* = 2.7 Hz), 131.2 (d, *J* = 12.3 Hz), 131.0, 130.4, 129.4 (d, *J* = 95.5 Hz), 128.7 (d, *J* = 12.2 Hz), 127.1, 126.5, 126.3 (d, *J* = 6.6 Hz),

126.2, 125.6, 125.1 (d,  $J = 10.2$  Hz), 124.6, 124.2, 123.6 (d,  $J = 13.7$  Hz).

$^{31}\text{P}$  NMR (162 MHz,  $\text{CDCl}_3$ )  $\delta$  32.85.

### (3zc) fluoranthen-3-yl)diphenylphosphine oxide

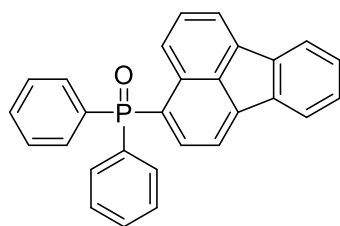

fluoranthen-3-yl)diphenylphosphine oxide  
Chemical Formula:  $\text{C}_{28}\text{H}_{19}\text{OP}$   
Exact Mass: 402.1174  
Molecular Weight: 402.4328

Following the General Procedure A with 3-bromofluorene (84.3 mg, 0.3 mmol), diphenylphosphine oxide (120.7 mg, 0.6 mmol), **3zc** was obtained as white solid (97.8 mg, 81%).

This target product was purified by acidic alumina flash chromatography (PE: EA = 1:3).

Melting point ( $^{\circ}\text{C}$ ): 87.9-90.3.

$^1\text{H}$  NMR (400 MHz,  $\text{CDCl}_3$ )  $\delta$  8.32 (d,  $J = 8.4$  Hz, 1H), 7.84 – 7.68 (m, 8H), 7.56 – 7.41 (m, 8H), 7.39 – 7.27 (m, 2H).

$^{13}\text{C}$  NMR (101 MHz,  $\text{CDCl}_3$ )  $\delta$  141.5 (d,  $J = 2.8$  Hz), 140.2, 138.3, 137.5 (d,  $J = 1.5$  Hz), 135.3 (d,  $J = 12.4$  Hz), 133.6, 132.9 (d,  $J = 10.2$  Hz), 132.6, 132.1 (d,  $J = 9.9$  Hz), 132.0 (d,  $J = 2.7$ ), 130.9 (d,  $J = 8.2$  Hz), 128.9 (d,  $J = 102.4$  Hz), 129.3, 128.9, 128.6 (d,  $J = 12.2$  Hz), 127.83, 127.18 (d,  $J = 3.9$  Hz), 121.9 (d,  $J = 64.4$  Hz), 120.8, 118.3 (d,  $J = 14.1$  Hz).

$^{31}\text{P}$  NMR (162 MHz,  $\text{CDCl}_3$ )  $\delta$  30.69.

IR ( $\text{cm}^{-1}$ ): 3429, 3055, 1604, 1439, 1186, 1112, 753, 702, 543.

HRMS (ESI)  $m/z$  calcd for  $\text{C}_{28}\text{H}_{19}\text{OPNa}^+$  ( $\text{M}+\text{Na}$ ) $^+$  425.1066, found 425.1064.

### (3zd) (9H-fluoren-2-yl)diphenylphosphine oxide

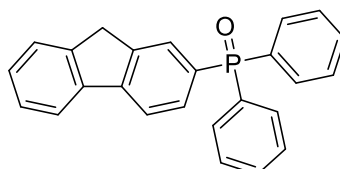

(9H-fluoren-2-yl)diphenylphosphine oxide  
Chemical Formula:  $\text{C}_{25}\text{H}_{19}\text{OP}$   
Exact Mass: 366.1174  
Molecular Weight: 366.3998

Following the General Procedure A with 9-bromophenanthrene (73.5 mg, 0.3 mmol), diphenylphosphine oxide (120.7 mg, 0.6 mmol), **3zd** was obtained as yellow oil (73.6 mg, 67%).

This target product was purified by acidic alumina flash chromatography (PE: EA = 1:3).

$^1\text{H}$  NMR (400 MHz,  $\text{CDCl}_3$ )  $\delta$  7.88 (d,  $J = 11.6$  Hz, 1H), 7.84 – 7.77 (m, 2H), 7.75 – 7.66 (m, 4H), 7.62 (dd,  $J = 11.6, 8.0$  Hz, 1H), 7.56 – 7.49 (m, 3H), 7.48 – 7.41 (m, 4H), 7.39 – 7.31 (m, 2H), 3.87 (s, 2H).

$^{13}\text{C}$  NMR (101 MHz,  $\text{CDCl}_3$ )  $\delta$  145.5 (d,  $J = 2.7$  Hz), 144.0, 143.3 (d,  $J = 13.2$  Hz), 140.4, 132.8 (d,  $J = 104.5$  Hz), 132.1 (d,  $J = 9.9$  Hz), 131.9 (d,  $J = 2.7$  Hz), 131.0 (d,  $J = 11.1$  Hz), 130.1 (d,  $J = 105.7$  Hz), 128.6 (d,  $J = 10.3$  Hz), 128.5 (d,  $J = 12.1$  Hz), 128.0, 127.0, 125.2, 120.7, 119.8 (d,  $J = 13.6$  Hz), 36.9.

$^{31}\text{P}$  NMR (162 MHz,  $\text{CDCl}_3$ )  $\delta$  29.96.

IR ( $\text{cm}^{-1}$ ): 3661, 3055, 2884, 1720, 1492, 1435, 1190, 737, 700, 543.

HRMS (ESI)  $m/z$  calcd for  $\text{C}_{25}\text{H}_{19}\text{OPNa}^+$  ( $\text{M}+\text{Na}$ ) $^+$  389.1066, found 389.1067.

**(3ze) (4-(benzo[d]thiazol-2-yl)phenyl)diphenylphosphine oxide (CAS: 1438435-79-0)<sup>12</sup>**

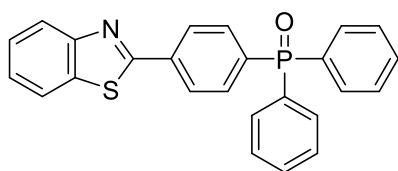

(4-(benzo[d]thiazol-2-yl)phenyl)diphenylphosphine oxide  
Chemical Formula: C<sub>25</sub>H<sub>18</sub>NOPS  
Exact Mass: 411.0847  
Molecular Weight: 411.4588

Following the General Procedure A with 2-(4-bromophenyl)benzo[d]thiazole (88.8 mg, 0.3 mmol), diphenylphosphine oxide (120.7 mg, 0.6 mmol), **3ze** was obtained as white solid (83.9 mg, 68%).

This target product was purified by acidic alumina flash chromatography (PE: EA = 1:3).

<sup>1</sup>H NMR (400 MHz, CDCl<sub>3</sub>) δ 8.15 (d, *J* = 8.0 Hz, 2H), 8.05 (d, *J* = 8.2 Hz, 1H), 7.86 (dd, *J* = 8.0, 0.6 Hz, 1H), 7.79 (dd, *J* = 11.6, 8.4 Hz, 2H), 7.69 (dd, *J* = 12.4, 7.6 Hz, 4H), 7.56 – 7.49 (m, 2H), 7.48 – 7.41 (m, 5H), 7.40 – 7.32 (m, 1H).

<sup>13</sup>C NMR (101 MHz, CDCl<sub>3</sub>) δ 166.4, 154.1, 136.7 (d, *J* = 2.9 Hz), 135.3 (d, *J* = 103.0 Hz), 135.2, 132.8 (d, *J* = 10.1 Hz), 132.1 (d, *J* = 105.1 Hz), 132.2 (d, *J* = 2.7 Hz), 132.1 (d, *J* = 10.0 Hz), 128.7 (d, *J* = 12.2 Hz), 127.4 (d, *J* = 12.3 Hz), 126.6, 125.8, 123.6, 121.8.

<sup>31</sup>P NMR (162 MHz, CDCl<sub>3</sub>) δ 28.43.

**(3ab) (4-isocyanophenyl)di-*p*-tolylphosphine oxide**

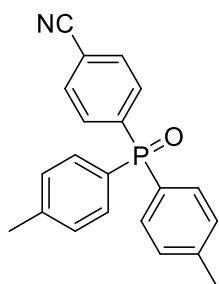

(4-isocyanophenyl)di-*p*-tolylphosphine oxide  
Chemical Formula: C<sub>21</sub>H<sub>18</sub>NOP  
Exact Mass: 331.1126  
Molecular Weight: 331.3548

Following the General Procedure A with 4-bromobenzonitrile (54.6 mg, 0.3 mmol), di-*p*-tolylphosphine oxide (138.2 mg, 0.6 mmol), **3ab** was obtained as white solid (60.6 mg, 61%).

Following the General Procedure A with 4-iodobenzonitrile (68.7 mg, 0.3 mmol), di-*p*-tolylphosphine oxide (138.2 mg, 0.6 mmol), **3ab** was obtained as white solid (75.5 mg, 76%).

This target product was purified by acidic alumina flash chromatography (PE: EA = 1:3).

Melting point (°C): 101.4-103.2.

<sup>1</sup>H NMR (400 MHz, CDCl<sub>3</sub>) δ 7.83 – 7.70 (m, 4H), 7.53 (dd, *J* = 12.0, 8.0 Hz, 4H), 7.33 – 7.26 (m, 4H), 2.41 (s, 6H).

<sup>13</sup>C NMR (101 MHz, CDCl<sub>3</sub>) δ 143.1 (d, *J* = 2.8 Hz), 139.1 (d, *J* = 99.4 Hz), 132.6 (d, *J* = 9.9 Hz), 132.0 (d, *J* = 10.4 Hz), 131.8, 129.5 (d, *J* = 12.7 Hz), 128.0 (d, *J* = 108.4 Hz), 118.0 (d, *J* = 1.4 Hz), 115.4 (d, *J* = 3.0 Hz), 21.6 (d, *J* = 1.1 Hz).

<sup>31</sup>P NMR (162 MHz, CDCl<sub>3</sub>) δ 27.94.

IR (cm<sup>-1</sup>): 3420, 3037, 2922, 2228, 1604, 1398, 1186, 1114, 808, 659, 514.

HRMS (ESI) *m/z* calcd for C<sub>21</sub>H<sub>18</sub>NOPNa<sup>+</sup> (*M*+Na)<sup>+</sup> 354.10182, found 354.10211.

**(3ac) 4-(bis(4-methoxyphenyl)phosphoryl)benzonitrile**

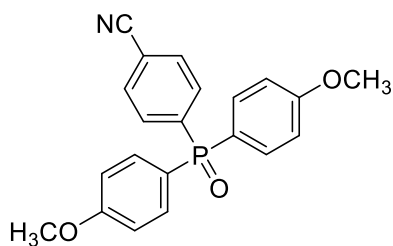

4-(bis(4-methoxyphenyl)phosphoryl)benzonitrile

Chemical Formula: C<sub>21</sub>H<sub>18</sub>NO<sub>3</sub>P

Exact Mass: 363.1024

Molecular Weight: 363.3528

Following the General Procedure A with 4-bromobenzonitrile (54.6 mg, 0.3 mmol), bis(4-methoxyphenyl)phosphine oxide (157.2 mg, 0.6 mmol), **3ac** was obtained as white solid (65.3 mg, 60%).

Following the General Procedure A with 4-iodobenzonitrile (68.7 mg, 0.3 mmol), bis(4-methoxyphenyl)phosphine oxide (157.2 mg, 0.6 mmol), **3ac** was obtained as white solid (78.4 mg, 72%).

This target product was purified by acidic alumina flash chromatography (PE: EA = 1:3).

Melting point (°C): 69.0-72.1.

<sup>1</sup>H NMR (400 MHz, CDCl<sub>3</sub>) δ 7.80-7.66 (m, 4H), 7.56 – 7.46 (m, 4H), 6.99 – 6.90 (m, 4H), 3.81 (s, 6H).

<sup>13</sup>C NMR (101 MHz, CDCl<sub>3</sub>) δ 162.8 (d, *J* = 2.8 Hz), 139.4 (d, *J* = 100.0 Hz), 133.9 (d, *J* = 11.4 Hz), 132.5 (d, *J* = 9.9 Hz), 131.9 (d, *J* = 11.8 Hz), 125.6 (d, *J* = 112.7 Hz), 118.0, 115.3 (d, *J* = 3.0 Hz), 114.4 (d, *J* = 13.3 Hz), 55.4.

<sup>31</sup>P NMR (162 MHz, CDCl<sub>3</sub>) δ 27.43.

IR (cm<sup>-1</sup>): 3414, 2951, 2805, 2229, 1596, 1500, 1298, 1259, 1178, 1114, 1020, 831.

HRMS (ESI) *m/z* calcd for C<sub>21</sub>H<sub>18</sub>NO<sub>3</sub>PNa<sup>+</sup> (M+Na)<sup>+</sup> 386.09165, found 386.09137.

**(3ad) bis(3,5-dimethylphenyl)(4-isocyanophenyl)phosphine oxide**

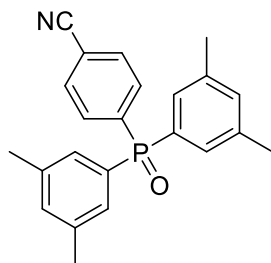

bis(3,5-dimethylphenyl)(4-isocyanophenyl)phosphine oxide

Chemical Formula: C<sub>23</sub>H<sub>22</sub>NOP

Exact Mass: 359.1439

Molecular Weight: 359.4088

Following the General Procedure A with 4-bromobenzonitrile (54.6 mg, 0.3 mmol), bis(3,5-dimethylphenyl)phosphine oxide (155.0 mg, 0.6 mmol), **3ad** was obtained as white solid (67.9 mg, 63%).

Following the General Procedure A with 4-iodobenzonitrile (68.7 mg, 0.3 mmol), bis(3,5-dimethylphenyl)phosphine oxide (155.0 mg, 0.6 mmol), **3ad** was obtained as white solid (89.4 mg, 83%).

This target product was purified by acidic alumina flash chromatography (PE: EA = 1:3).

Melting point (°C): 150.6-153.4.

<sup>1</sup>H NMR (400 MHz, CDCl<sub>3</sub>) δ 7.81 – 7.68 (m, 4H), 7.22 (d, *J* = 12.6 Hz, 4H), 7.17 (s, 2H), 2.30 (s, 12H).

<sup>13</sup>C NMR (101 MHz, CDCl<sub>3</sub>) δ 139.5, 138.5 (d, *J* = 12.9 Hz), 134.2 (d, *J* = 2.9 Hz), 132.6 (d, *J* = 9.8 Hz), 131.9 (d, *J* = 11.8 Hz), 131.0 (d, *J* = 104.9 Hz), 129.5 (d, *J* = 10.0 Hz), 118.0 (d, *J* = 1.4 Hz), 115.4 (d, *J* = 3.1 Hz), 21.3.

<sup>31</sup>P NMR (162 MHz, CDCl<sub>3</sub>) δ 28.37.

IR (cm<sup>-1</sup>): 3412, 3031, 2918, 2855, 2229, 1596, 1406, 1186, 1127, 849, 696, 578.

HRMS (ESI) *m/z* calcd for C<sub>23</sub>H<sub>22</sub>NOPNa<sup>+</sup> (M+Na)<sup>+</sup> 382.13312, found 382.13345.

**(3ae) 4-(di(naphthalen-2-yl)phosphoryl)benzonitrile**



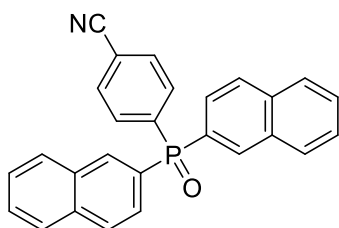

4-(di(naphthalen-2-yl)phosphoryl)benzonitrile  
 Chemical Formula: C<sub>27</sub>H<sub>18</sub>NOP  
 Exact Mass: 403.1126  
 Molecular Weight: 403.4208

Following the General Procedure A with 4-bromobenzonitrile (54.6 mg, 0.3 mmol), di(naphthalen-2-yl)phosphine oxide (181.2 mg, 0.6 mmol), **3ae** was obtained as white solid (87.5 mg, 69%).

Following the General Procedure A with 4-iodobenzonitrile (68.7 mg, 0.3 mmol), di(naphthalen-2-yl)phosphine oxide (181.2 mg, 0.6 mmol), **3ae** was obtained as white solid (101.5 mg, 80%).

This target product was purified by acidic alumina flash chromatography (PE: EA = 1:3).

Melting point (°C): 72.8-74.2.

<sup>1</sup>H NMR (400 MHz, CDCl<sub>3</sub>) δ 8.31 (d, *J* = 14.2 Hz, 2H), 7.96 – 7.83 (m, 8H), 7.74 (dd, *J* = 8.4, 2.2 Hz, 2H), 7.69 – 7.51 (m, 6H).

<sup>13</sup>C NMR (101 MHz, CDCl<sub>3</sub>) δ 138.6 (d, *J* = 99.8 Hz), 134.9 (d, *J* = 2.3 Hz), 134.3 (d, *J* = 9.6 Hz), 132.8 (d, *J* = 10.0 Hz), 132.5 (d, *J* = 13.6 Hz), 132.1 (d, *J* = 12.0 Hz), 129.0, 128.9, 128.7 (d, *J* = 3.3 Hz), 128.0, 127.7, 127.3, 126.5 (d, *J* = 10.8 Hz), 117.9, 115.7 (d, *J* = 3.1 Hz).

<sup>31</sup>P NMR (162 MHz, CDCl<sub>3</sub>) δ 27.93.

IR (cm<sup>-1</sup>): 3431, 3055, 2229, 1633, 1388, 1190, 1094, 822, 657.

HRMS (ESI) *m/z* calcd for C<sub>27</sub>H<sub>18</sub>NOPNa<sup>+</sup> (M+Na)<sup>+</sup> 426.10182, found 426.10172.

#### (5aa) 4-(dodecylthio)benzonitrile (CAS: 26960-82-7)<sup>13</sup>

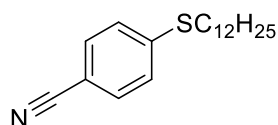

4-(dodecylthio)benzonitrile  
 Chemical Formula: C<sub>19</sub>H<sub>29</sub>NS  
 Exact Mass: 303.2021  
 Molecular Weight: 303.5080

Following the General Procedure B with 4-bromobenzonitrile (54.6 mg, 0.3 mmol), 1-dodecanethiol (121.4 mg, 0.6 mmol), **5aa** was obtained as yellow solid (80.9 mg, 89%).

Following the General Procedure B with 4-iodobenzonitrile (68.8 mg, 0.3 mmol), 1-dodecanethiol (121.4 mg, 0.6 mmol), **5aa** was obtained as yellow solid (74.4 mg, 82%).

This target product was purified by silica gel flash chromatography (PE: EA = 100:1).

<sup>1</sup>H NMR (400 MHz, CDCl<sub>3</sub>) δ 7.53 – 7.48 (m, 2H), 7.30 – 7.25 (m, 2H), 2.96 (t, *J* = 7.4 Hz, 2H), 1.69 (pent, *J* = 7.6 Hz, 2H), 1.49 – 1.39 (m, 2H), 1.36 – 1.22 (m, 16H), 0.88 (t, *J* = 7.0 Hz, 3H).

<sup>13</sup>C NMR (101 MHz, CDCl<sub>3</sub>) δ 145.4, 132.2, 126.6, 119.0, 107.84, 31.9, 31.9, 29.7, 29.6, 29.6, 29.5, 29.5, 29.1, 28.9, 28.6, 22.7, 14.2.

#### (5ba) dodecyl(4-methoxyphenyl)sulfane (CAS: 867017-31-0)<sup>13</sup>

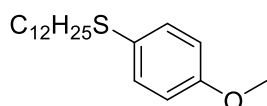

dodecyl(4-methoxyphenyl)sulfane  
 Chemical Formula: C<sub>19</sub>H<sub>32</sub>OS  
 Exact Mass: 308.2174  
 Molecular Weight: 308.5240

Following the General Procedure B with 4-iodoanisole (70.2 mg, 0.3 mmol), 1-dodecanethiol (121.4 mg, 0.6 mmol), **5ba** was obtained as white solid (80.4 mg, 87%).

This target product was purified by silica gel flash chromatography (PE: EA = 200:1).

<sup>1</sup>H NMR (400 MHz, CDCl<sub>3</sub>) δ 7.36 – 7.31 (m, 2H), 6.87 – 6.81 (m, 2H), 3.79 (s, 3H), 2.81 (t, *J* = 7.4 Hz, 2H), 1.57 (pent, *J* = 7.4 Hz, 2H), 1.42 – 1.34 (m, 2H), 1.31 – 1.21 (m, 16H), 0.88 (t, *J* = 7.0 Hz, 3H).

<sup>13</sup>C NMR (101 MHz, CDCl<sub>3</sub>) δ 158.7, 132.9, 127.0, 114.5, 55.3, 35.84, 31.9, 29.7, 29.7, 29.6, 29.5, 29.4, 29.2, 28.7, 22.7, 14.2.

#### (5ca) dodecyl(p-tolyl)sulfane (CAS: 94435-76-4)<sup>14</sup>

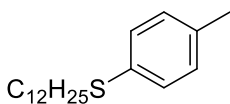

dodecyl(*p*-tolyl)sulfane  
 Chemical Formula: C<sub>19</sub>H<sub>32</sub>S  
 Exact Mass: 292.2225  
 Molecular Weight: 292.5250

Following the General Procedure B with 4-bromotoluene (51.3 mg, 0.3 mmol), 1-dodecanethiol (121.4 mg, 0.6 mmol), **5ca** was obtained as colorless oil (68.5 mg, 78%).

Following the General Procedure B with 4-iodotoluene (65.4 mg, 0.3 mmol), 1-dodecanethiol (121.4 mg, 0.6 mmol), **5ca** was obtained as colorless oil (68.4 mg, 78%).

This target product was purified by silica gel flash chromatography (PE: EA = 200:1).

<sup>1</sup>H NMR (400 MHz, CDCl<sub>3</sub>) δ 7.26 – 7.22 (m, 2H), 7.09 (d, *J* = 8.0 Hz, 2H), 2.87 (t, *J* = 7.4 Hz, 2H), 2.31 (s, 3H), 1.61 (pent, *J* = 7.4 Hz, 2H), 1.143 - 1.34 (m, 2H), 1.32 – 1.22 (m, 16H), 0.88 (t, *J* = 6.8 Hz, 3H).

<sup>13</sup>C NMR (101 MHz, CDCl<sub>3</sub>) δ 135.8, 133.2, 129.7, 129.6, 34.4, 32.0, 29.7, 29.7, 29.6, 29.6, 29.4, 29.3, 29.2, 28.9, 22.7, 21.0, 14.2.

**(5da) dodecyl(phenyl)sulfane (CAS: 56056-49-6)<sup>13</sup>**

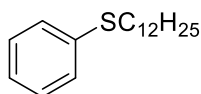

dodecyl(phenyl)sulfane  
 Chemical Formula: C<sub>18</sub>H<sub>30</sub>S  
 Exact Mass: 278.2068  
 Molecular Weight: 278.4980

Following the General Procedure B with bromobenzene (47.1 mg, 0.3 mmol), 1-dodecanethiol (121.4 mg, 0.6 mmol), **5da** was obtained as colorless oil (73.6 mg, 88%).

Following the General Procedure B with iodobenzene (61.2 mg, 0.3 mmol), 1-dodecanethiol (121.4 mg, 0.6 mmol), **5da** was obtained as colorless oil (53.8 mg, 64%).

This target product was purified by silica gel flash chromatography (PE: EA = 200:1).

<sup>1</sup>H NMR (400 MHz, CDCl<sub>3</sub>) δ 7.34 – 7.30 (m, 2H), 7.29 – 7.25 (m, 2H), 7.19 – 7.12 (m, 1H), 2.91 (t, *J* = 7.4 Hz, 2H), 1.64 (pent, *J* = 7.6 Hz, 2H), 1.40 (m, 2H), 1.33 – 1.22 (m, 16H), 0.88 (t, *J* = 7.0 Hz, 3H).

<sup>13</sup>C NMR (101 MHz, CDCl<sub>3</sub>) δ 137.1, 128.8, 128.8, 125.6, 33.6, 31.93, 29.7, 29.6, 29.6, 29.5, 29.4, 29.2, 29.2, 28.9, 22.7, 14.1.

**(5ea) ethyl 4-(dodecylthio)benzoate (CAS: 1207539-20-5)<sup>14</sup>**

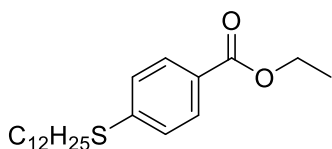

ethyl 4-(dodecylthio)benzoate  
 Chemical Formula: C<sub>21</sub>H<sub>34</sub>O<sub>2</sub>S  
 Exact Mass: 350.2280  
 Molecular Weight: 350.5610

Following the General Procedure B with ethyl-4-bromobenzoate (68.7 mg, 0.3 mmol), 1-dodecanethiol (121.4 mg, 0.6 mmol), **5ea** was obtained as yellow oil (63.8 mg, 61%).

Following the General Procedure B with ethyl-4-iodobenzoate (82.8 mg, 0.3 mmol), 1-dodecanethiol (121.4 mg, 0.6 mmol), **5ea** was obtained as yellow oil (86.2 mg, 82%).

This target product was purified by silica gel flash chromatography (PE: EA = 200:1).

<sup>1</sup>H NMR (400 MHz, CDCl<sub>3</sub>) δ 7.96 – 7.90 (m, 2H), 7.30 – 7.25 (m, 2H), 4.36 (q, *J* = 7.1 Hz, 2H), 2.97 (t, *J* = 7.4 Hz, 2H), 1.69 (pent, *J* = 7.5 Hz, 2H), 1.48 - 1.41 (m, 2H), 1.38 (t, *J* = 7.2 Hz, 3H), 1.34 - 1.22 (m, 16H), 0.88 (t, *J* = 6.8 Hz, 3H).

<sup>13</sup>C NMR (101 MHz, CDCl<sub>3</sub>) δ 166.4, 144.3, 129.9, 126.9, 126.3, 60.9, 32.1, 31.9, 29.7, 29.6, 29.6, 29.5, 29.4, 29.2, 28.9, 28.8, 22.7, 14.4, 14.2.

**(5fa) dodecyl(3-methoxyphenyl)sulfane (CAS: 2126724-71-6)<sup>15</sup>**

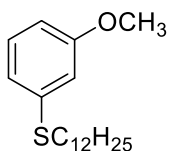

dodecyl(3-methoxyphenyl)sulfane

Chemical Formula: C<sub>19</sub>H<sub>32</sub>OS

Exact Mass: 308.21739

Molecular Weight: 308.52400

(s, 16H), 0.88 (t, *J* = 6.8 Hz, 3H).

<sup>13</sup>C NMR (101 MHz, CDCl<sub>3</sub>) δ 159.8, 138.6, 129.6, 120.8, 114.0, 111.2, 55.2, 33.4, 32.0, 29.7, 29.7, 29.6, 29.6, 29.4, 29.2, 29.2, 28.9, 22.7, 14.2.

Following the General Procedure B with 1-iodo-3-methoxybenzene (70.2 mg, 0.3 mmol), 1-dodecanethiol (121.4 mg, 0.6 mmol), **5fa** was obtained as colorless oil (70.3 mg, 76%). This target product was purified by acidic alumina flash chromatography (PE: EA = 100:1).

<sup>1</sup>H NMR (400 MHz, CDCl<sub>3</sub>) δ 7.17 (t, *J* = 8.0 Hz, 1H), 6.91 – 6.84 (m, 2H), 6.69 (dd, *J* = 8.2, 2.4 Hz, 1H), 3.78 (s, 3H), 2.95 – 2.85 (m, 2H), 1.69 – 1.60 (m, 2H), 1.45 – 1.37 (m, 2H), 1.26

**(5ga) dodecyl(*m*-tolyl)sulfane (CAS: 1450829-03-4)<sup>16</sup>**

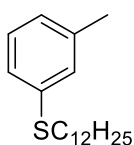

dodecyl(*m*-tolyl)sulfane

Chemical Formula: C<sub>19</sub>H<sub>32</sub>S

Exact Mass: 292.22247

Molecular Weight: 292.52500

<sup>13</sup>C NMR (101 MHz, CDCl<sub>3</sub>) δ 138.5, 136.9, 129.5, 128.7, 126.5, 125.8, 33.6, 32.0, 29.7, 29.7, 29.6, 29.6, 29.4, 29.2, 29.2, 28.9, 22.7, 21.4, 14.2.

Following the General Procedure B with 1-iodo-3-methylbenzene (65.4 mg, 0.3 mmol), 1-dodecanethiol (121.4 mg, 0.6 mmol), **5ga** was obtained as colorless oil (57.0 mg, 65%).

This target product was purified by acidic alumina flash chromatography (PE: EA = 100:1).

<sup>1</sup>H NMR (400 MHz, CDCl<sub>3</sub>) δ 7.22 – 7.11 (m, 3H), 6.98 (d, *J* = 7.6 Hz, 1H), 2.98 – 2.87 (m, 2H), 2.34 (s, 3H), 1.72 – 1.60 (m, 2H), 1.49 – 1.38 (m, 2H), 1.28 (s, 16H), 0.90 (t, *J* = 6.8 Hz, 3H).

**(5ha) dodecyl(*o*-tolyl)sulfane (CAS: 1079988-46-7)<sup>16</sup>**

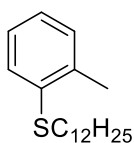

dodecyl(*o*-tolyl)sulfane

Chemical Formula: C<sub>19</sub>H<sub>32</sub>S

Exact Mass: 292.22247

Molecular Weight: 292.52500

6.6 Hz, 3H).

<sup>13</sup>C NMR (101 MHz, CDCl<sub>3</sub>) δ 137.2, 136.5, 130.0, 127.3, 126.3, 125.2, 32.8, 32.0, 29.7, 29.7, 29.6, 29.6, 29.4, 29.2, 29.1, 29.0, 22.7, 20.4, 14.2.

Following the General Procedure B with 1-iodo-2-methylbenzene (65.4 mg, 0.3 mmol), 1-dodecanethiol (121.4 mg, 0.6 mmol), **5ha** was obtained as colorless oil (48.3 mg, 55%).

This target product was purified by acidic alumina flash chromatography (PE: EA = 100:1).

<sup>1</sup>H NMR (400 MHz, CDCl<sub>3</sub>) δ 7.24 (d, *J* = 8.0 Hz, 1H), 7.14 (t, *J* = 6.6 Hz, 2H), 7.09 – 7.03 (m, 1H), 2.94 – 2.83 (m, 2H), 2.36 (s, 3H), 1.71 – 1.61 (m, 2H), 1.47 – 1.39 (m, 2H), 1.26 (s, 16H), 0.88 (t, *J* =

**(5ia) 4-(dodecylthio)-2-methylpyridine**

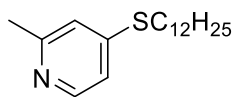

**4-(dodecylthio)-2-methylpyridine**

Chemical Formula: C<sub>18</sub>H<sub>31</sub>NS

Exact Mass: 293.2177

Molecular Weight: 293.5130

(s, 3H), 1.75 – 1.64 (m, 2H), 1.49 – 1.39 (m, 2H), 1.28 - 1.22 (m, 16H), 0.87 (t, *J* = 6.8 Hz, 3H).

<sup>13</sup>C NMR (101 MHz, CDCl<sub>3</sub>) δ 157.9, 149.6, 148.6, 120.0, 117.8, 31.9, 30.6, 29.6, 29.6, 29.6, 29.5, 29.3, 29.1, 28.9, 28.5, 24.4, 22.7, 14.1.

IR (cm<sup>-1</sup>): 2961, 2933, 2848, 1578, 1474, 872.

HRMS (ESI) *m/z* calcd for C<sub>18</sub>H<sub>32</sub>NS<sup>+</sup> (M+H)<sup>+</sup> 294.2250, found 294.2253.

Following the General Procedure B with 4-bromo-2-methylpyridine (51.6 mg, 0.3 mmol), 1-dodecanethiol (121.4 mg, 0.6 mmol), **5ia** was obtained as colorless oil (29.6 mg, 34%).

This target product was purified by silica gel flash chromatography (PE: EA = 10:1).

<sup>1</sup>H NMR (400 MHz, CDCl<sub>3</sub>) δ 8.26 (d, *J* = 5.2 Hz, 1H), 6.95 (s, 1H), 6.90 (dd, *J* = 5.6, 1.6 Hz, 1H), 2.94 (t, *J* = 7.4 Hz, 2H), 2.48

**(5ja) 4-(dodecylthio)-2-(trifluoromethyl)pyridine**

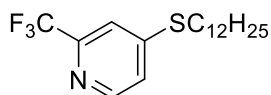

**4-(dodecylthio)-2-(trifluoromethyl)pyridine**

Chemical Formula: C<sub>18</sub>H<sub>28</sub>F<sub>3</sub>NS

Exact Mass: 347.1895

Molecular Weight: 347.4842

7.44 (d, *J* = 1.6 Hz, 1H), 7.23 (dd, *J* = 5.4, 1.4 Hz, 1H), 2.99 (t, *J* = 7.4 Hz, 2H), 1.77 – 1.65 (m, 2H), 1.51 – 1.41 (m, 2H), 1.35 – 1.19 (m, 16H), 0.86 (t, *J* = 6.8 Hz, 3H).

<sup>13</sup>C NMR (101 MHz, CDCl<sub>3</sub>) δ 152.4, 149.2, 148.0 (q, *J* = 34 Hz), 122.5, 121.5 (q, *J* = 276 Hz), 117.1 (q, *J* = 3 Hz), 31.9, 30.8, 29.6, 29.5, 29.4, 29.3, 29.1, 28.8, 28.2, 22.7, 14.1.

<sup>19</sup>F NMR (376 MHz, CDCl<sub>3</sub>) δ -68.32.

IR (cm<sup>-1</sup>): 2943, 2848, 1587, 1314, 1145, 721.

HRMS (ESI) *m/z* calcd for C<sub>18</sub>H<sub>29</sub>F<sub>3</sub>NS<sup>+</sup> (M+H)<sup>+</sup> 348.1967, found 348.1968.

Following the General Procedure B with 2-(trifluoromethyl)-4-bromopyridine (67.8 mg, 0.3 mmol), 1-dodecanethiol (121.4 mg, 0.6 mmol), **5ja** was obtained as colorless oil (85.7 mg, 82%).

This target product was purified by silica gel flash chromatography (PE: EA = 10:1).

<sup>1</sup>H NMR (400 MHz, CDCl<sub>3</sub>) δ 8.46 (d, *J* = 5.2 Hz, 1H), 7.44 (d, *J* = 1.6 Hz, 1H), 7.23 (dd, *J* = 5.4, 1.4 Hz, 1H), 2.99 (t, *J* = 7.4 Hz, 2H), 1.77 – 1.65 (m, 2H), 1.51 – 1.41 (m, 2H), 1.35 – 1.19 (m, 16H), 0.86 (t, *J* = 6.8 Hz, 3H).

**(5ka) 5-(dodecylthio)-2-methoxy-3-(trifluoromethyl)pyridine**

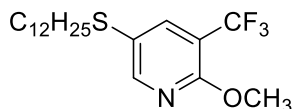

**5-(dodecylthio)-2-methoxy-3-**

**(trifluoromethyl)pyridine**

Chemical Formula: C<sub>19</sub>H<sub>30</sub>F<sub>3</sub>NOS

Exact Mass: 377.2000

Molecular Weight: 377.5102

– 2.41 (m, 1H), 1.57 (m, 2H), 1.39 (d, *J* = 11.6 Hz, 2H), 1.25 (s, 16H), 0.87 (t, *J* = 6.6 Hz, 3H).

<sup>13</sup>C NMR (101 MHz, CDCl<sub>3</sub>) δ 153.1, 151.1, 140.0 (q, *J* = 4.8 Hz), 138.8 (q, *J* = 5.0 Hz), 124.3, 110.6, 54.4, 54.2, 36.1, 31.9, 29.6, 29.6, 29.5, 29.3, 29.3, 29.1, 28.5, 22.7, 14.1.

<sup>19</sup>F NMR (376 MHz, CDCl<sub>3</sub>) δ -64.00 (s).

IR (cm<sup>-1</sup>): 2924, 2855, 1718, 1598, 1469, 1324, 1149, 1057, 918, 692.

HRMS (ESI) *m/z* calcd for C<sub>19</sub>H<sub>31</sub>F<sub>3</sub>NOS<sup>+</sup> (M+H)<sup>+</sup> 378.2073, found 378.2071.

Following the General Procedure B with 5-bromo-2-methoxy-3-(trifluoromethyl)pyridine (76.8 mg, 0.3 mmol), 1-dodecanethiol (121.4 mg, 0.6 mmol), **5ka** was obtained as colorless oil (76.8 mg, 68%).

This target product was purified by acidic alumina flash chromatography (PE: EA = 10:1).

<sup>1</sup>H NMR (400 MHz, CDCl<sub>3</sub>) δ 8.40 – 8.27 (m, 1H), 7.90 (dd, *J* = 20.0, 1.6 Hz, 1H), 4.02 (s, 3H), 2.80 (t, *J* = 7.2 Hz, 1H), 2.61

**(5la) 2-(dodecylthio)pyridine (CAS: 1079988-48-9)<sup>17</sup>**

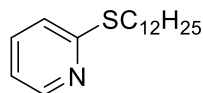

2-(dodecylthio)pyridine  
Chemical Formula: C<sub>17</sub>H<sub>29</sub>NS  
Exact Mass: 279.2021  
Molecular Weight: 279.4860

Following the General Procedure B with 2-bromopyridine (47.4 mg, 0.3 mmol), 1-dodecanethiol (121.4 mg, 0.6 mmol), **5la** was obtained as colorless oil (50.3 mg, 60%).

This target product was purified by acidic alumina flash chromatography (PE: EA = 10:1).

<sup>1</sup>H NMR (400 MHz, CDCl<sub>3</sub>) δ 8.41 (d, *J* = 4.4 Hz, 1H), 7.44 (td, *J* = 8.0, 2.0 Hz, 1H), 7.15 (d, *J* = 8.0 Hz, 1H), 6.94 (dd, *J* = 6.8, 5.2 Hz, 1H), 3.15 (t, *J* = 7.4 Hz, 2H), 1.77 – 1.63 (m, 2H), 1.49 – 1.39 (m, 2H), 1.25 (s, 16H), 0.87 (t, *J* = 6.4 Hz, 3H).

<sup>13</sup>C NMR (101 MHz, CDCl<sub>3</sub>) δ 159.7, 149.4, 135.8, 122.1, 119.1, 31.9, 30.1, 29.7, 29.7, 29.6, 29.5, 29.4, 29.3, 29.2, 29.0, 22.7, 14.1.

**(5ma) dodecyl(1H-inden-2-yl)sulfane**

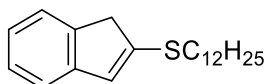

dodecyl(1H-inden-2-yl)sulfane  
Chemical Formula: C<sub>21</sub>H<sub>32</sub>S  
Exact Mass: 316.2225  
Molecular Weight: 316.5470

Following the General Procedure B with 2-bromo-1H-indene (58.5 mg, 0.3 mmol), 1-dodecanethiol (121.4 mg, 0.6 mmol), **5ma** was obtained as white solid (60.3 mg, 64%).

This target product was purified by silica gel flash chromatography (PE: EA = 200:1).

Melting point (°C): 49.8-51.2.  
<sup>1</sup>H NMR (400 MHz, CDCl<sub>3</sub>) δ 7.35 (d, *J* = 7.2 Hz, 1H), 7.22 (d, *J* = 4.0 Hz, 2H), 7.12 – 7.04 (m, 1H), 6.50 (s, 1H), 3.49 (s, 2H), 2.93 (t, *J* = 7.4 Hz, 2H), 1.74 (pent, *J* = 7.4 Hz, 2H), 1.51 - 1.42 (m, 2H), 1.38 - 1.24 (m, 16H), 0.91 (t, *J* = 6.8 Hz, 3H).

<sup>13</sup>C NMR (101 MHz, CDCl<sub>3</sub>) δ 145.2, 144.1, 142.2, 126.6, 124.3, 123.4, 123.1, 119.0, 42.1, 32.6, 32.0, 29.7, 29.7, 29.6, 29.6, 29.4, 29.3, 29.1, 29.0, 22.7, 14.2.

IR (cm<sup>-1</sup>): 2961, 2914, 2858, 1465, 834, 721.

HRMS (ESI) *m/z* calcd for C<sub>21</sub>H<sub>33</sub>S<sup>+</sup> (M+H)<sup>+</sup> 317.2298, found 317.2299.

**(5na) 3-(dodecylthio)thiophene (CAS: 120186-63-2)**

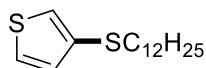

3-(dodecylthio)thiophene  
Chemical Formula: C<sub>16</sub>H<sub>28</sub>S<sub>2</sub>  
Exact Mass: 284.1632  
Molecular Weight: 284.5200

Following the General Procedure B with 3-iodothiophene (63.0 mg, 0.3 mmol), 1-dodecanethiol (121.4 mg, 0.6 mmol), **5na** was obtained as brown solid (72.0 mg, 84%).

This target product was purified by silica gel flash chromatography (PE: EA = 200:1).

Melting point (°C): 32.5-33.7.  
<sup>1</sup>H NMR (400 MHz, CDCl<sub>3</sub>) δ 7.31 (dd, *J* = 5.0, 3.0 Hz, 1H), 7.11 (dd, *J* = 2.8, 1.2 Hz, 1H), 7.02 (dd, *J* = 5.2, 1.2 Hz, 1H), 2.84 (t, *J* = 7.4 Hz, 2H), 1.62 (pent, *J* = 7.4 Hz, 2H), 1.45 - 1.36 (m, 2H), 1.35 - 1.19 (m, 16H), 0.89 (t, *J* = 6.8 Hz, 3H).

<sup>13</sup>C NMR (101 MHz, CDCl<sub>3</sub>) δ 132.4, 129.7, 126.0, 122.8, 35.4, 32.0, 29.7, 29.7, 29.6, 29.5, 29.4, 29.4, 29.2, 28.7, 22.7, 14.2.

HRMS (ESI) *m/z* calcd for C<sub>16</sub>H<sub>29</sub>S<sub>2</sub><sup>+</sup> (M+H)<sup>+</sup> 285.1705, found 285.1706.

**(5oa) dodecyl(phenanthren-9-yl)sulfane (CAS: 259270-08-1)**

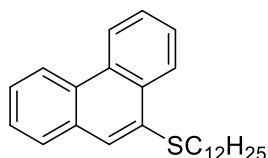

dodecyl(phenanthren-9-yl)sulfane

Chemical Formula: C<sub>26</sub>H<sub>34</sub>S

Exact Mass: 378.23812

Molecular Weight: 378.61800

<sup>1</sup>H NMR (400 MHz, CDCl<sub>3</sub>) δ 8.71 (dd, *J* = 6.7, 2.8 Hz, 1H), 8.64 (d, *J* = 7.6 Hz, 1H), 8.53 – 8.47 (m, 1H), 7.84 – 7.79 (m, 1H), 7.78 (s, 1H), 7.70 – 7.65 (m, 2H), 7.64 – 7.56 (m, 2H), 3.06 (t, *J* = 7.4 Hz, 2H), 1.82 – 1.68 (m, 2H), 1.53 – 1.46 (m, 2H), 1.26 (s, 16H), 0.89 (t, 3H).

<sup>13</sup>C NMR (101 MHz, CDCl<sub>3</sub>) δ 132.9, 131.9, 131.3, 130.6, 129.4, 127.8, 127.3, 126.9, 126.9, 126.8, 126.4, 125.6, 123.0, 122.6, 33.8, 32.0, 29.7, 29.7, 29.6, 29.5, 29.4, 29.2, 29.0, 22.7, 14.2.

IR (cm<sup>-1</sup>): 3059, 2924, 2849, 1716, 1580, 1459, 1365, 941, 753.

HRMS (ESI) *m/z* calcd for C<sub>26</sub>H<sub>34</sub>SNa<sup>+</sup> (M+Na)<sup>+</sup> 401.2273, found 401.2270

Following the General Procedure B with 9-bromophenanthrene (78.7 mg, 0.3 mmol), 1-dodecanethiol (121.4 mg, 0.6 mmol), **50a** was obtained as white solid (46.1 mg, 41%).

This target product was purified by acidic alumina flash chromatography (PE: EA = 100:1).

Melting point (°C): 60.7-62.0.

<sup>1</sup>H NMR (400 MHz, CDCl<sub>3</sub>) δ 8.71 (dd, *J* = 6.7, 2.8 Hz, 1H), 8.64 (d, *J* = 7.6 Hz, 1H), 8.53 – 8.47 (m, 1H), 7.84 – 7.79 (m,

1H), 7.78 (s, 1H), 7.70 – 7.65 (m, 2H), 7.64 – 7.56 (m, 2H), 3.06 (t, *J* = 7.4 Hz, 2H), 1.82 – 1.68 (m, 2H), 1.53 – 1.46 (m, 2H), 1.26 (s, 16H), 0.89 (t, 3H).

<sup>13</sup>C NMR (101 MHz, CDCl<sub>3</sub>) δ 132.9, 131.9, 131.3, 130.6, 129.4, 127.8, 127.3, 126.9, 126.9, 126.8, 126.4, 125.6, 123.0, 122.6, 33.8, 32.0, 29.7, 29.7, 29.6, 29.5, 29.4, 29.2, 29.0, 22.7, 14.2.

IR (cm<sup>-1</sup>): 3059, 2924, 2849, 1716, 1580, 1459, 1365, 941, 753.

HRMS (ESI) *m/z* calcd for C<sub>26</sub>H<sub>34</sub>SNa<sup>+</sup> (M+Na)<sup>+</sup> 401.2273, found 401.2270

**(5ab) 4-((6-oxo-4-propyl-1,6-dihydropyrimidin-2-yl)thio)benzotrile (CAS: 1019608-50-4)**

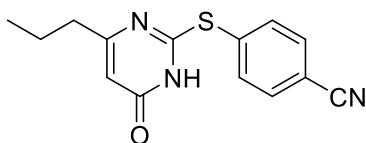

4-((6-oxo-4-propyl-1,6-dihydropyrimidin-2-yl)thio)benzotrile

Chemical Formula: C<sub>14</sub>H<sub>13</sub>N<sub>3</sub>OS

Exact Mass: 271.0779

Molecular Weight: 271.3380

Following the General Procedure B with 4-bromobenzotrile (54.6 mg, 0.3 mmol), propylthiouracil (102.1 mg, 0.6 mmol), **5ab** was obtained as white solid (43.2 mg, 53%).

Following the General Procedure B with 4-iodobenzotrile (68.8 mg, 0.3 mmol), propylthiouracil (102.1 mg, 0.6 mmol), **5ab** was obtained as white solid (40.7 mg, 50%).

This target product was purified by acidic alumina

flash chromatography (DCM: EA: MeOH = 1:1:0.1).

Melting point (°C): 182.2-184.1.

<sup>1</sup>H NMR (400 MHz, CDCl<sub>3</sub>) δ 13.02 (s, 1H), 7.77 - 7.65 (m, 4H), 6.09 (s, 1H), 2.38 (t, *J* = 7.4 Hz, 2H), 1.60 – 1.49 (m, 2H), 0.88 (t, *J* = 7.4 Hz, 3H).

<sup>13</sup>C NMR (101 MHz, CDCl<sub>3</sub>) δ 170.0, 165.5, 158.2, 135.2, 133.3, 132.6, 118.1, 113.4, 108.9, 39.3, 20.8, 13.5.

IR (cm<sup>-1</sup>): 2971, 2933, 2227, 1653, 1541, 1173, 975, 834, 533.

HRMS (ESI) *m/z* calcd for C<sub>14</sub>H<sub>14</sub>N<sub>3</sub>OS<sup>+</sup> (M+H)<sup>+</sup> 272.0852, found 272.0856.

**(5ac) 4-(octylthio)benzotrile (CAS: 153199-19-0)<sup>18</sup>**

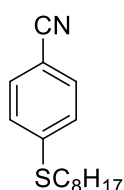

4-(octylthio)benzotrile

Chemical Formula: C<sub>15</sub>H<sub>21</sub>NS

Exact Mass: 247.13947

Molecular Weight: 247.40000

Following the General Procedure B with 4-bromobenzotrile (54.6 mg, 0.3 mmol), octane-1-thiol (85.6 mg, 0.6 mmol), **5ac** was obtained as colorless oil (57.9 mg, 78%).

This target product was purified by acidic alumina flash chromatography (PE: EA = 100:1).

<sup>1</sup>H NMR (400 MHz, CDCl<sub>3</sub>) δ 7.51 (d, *J* = 8.4 Hz, 2H), 7.29 (d, *J* = 8.8 Hz, 2H), 3.02 – 2.92 (m, 2H), 1.73 – 1.64 (m, 2H), 1.49 – 1.40 (m, 2H), 1.28 (s, 8H), 0.89 (t, *J* = 6.8 Hz, 3H).

<sup>13</sup>C NMR (101 MHz, CDCl<sub>3</sub>) δ 145.4, 132.2, 126.6, 119.0, 107.9,

31.9, 31.8, 29.1, 29.1, 28.9, 28.6, 22.6, 14.1.

## 8. References

- (1) Yang, J.; Xiao, J.; Chen, T.; Yin, S. F.; Han, L. B., Efficient nickel-catalyzed phosphinylation of C-S bonds forming C-P bonds. *Chemical Communications* **2016**, 52 (82), 12233-12236.
- (2) Fu, T.; Qiao, H.; Peng, Z.; Hu, G.; Wu, X.; Gao, Y.; Zhao, Y., Palladium-catalyzed air-based oxidative coupling of arylboronic acids with H-phosphine oxides leading to aryl phosphine oxides. *Organic & Biomolecular Chemistry* **2014**, 12 (18), 2895-2902.
- (3) Berrino, R.; Cacchi, S.; Fabrizi, G.; Goggiamani, A.; Stabile, P., Arenediazonium tetrafluoroborates in palladium-catalyzed C-P bond-forming reactions. Synthesis of arylphosphonates, -phosphine oxides, and -phosphines. *Organic & Biomolecular Chemistry* **2010**, 8 (20), 4518-4520.
- (4) Zhong, C. H.; Huang, W., Synthesis of Aryldiphenylphosphine Oxides by Quaternization of Tertiary Diphenylphosphines with Aryl Bromides Followed by the Wittig Reaction. *ACS Omega* **2020**, 5 (26), 16010-16020.
- (5) Koohgard, M.; Karimitabar, H.; Hosseini-Sarvari, M., Visible-light-mediated semi-heterogeneous black TiO<sub>2</sub>/nickel dual catalytic C(sp<sup>2</sup>)-P bond formation toward aryl phosphonates. *Dalton Trans* **2020**, 49 (47), 17147-17151.
- (6) Dong, J.; Liu, L.; Ji, X.; Shang, Q.; Liu, L.; Su, L.; Chen, B.; Kan, R.; Zhou, Y.; Yin, S. F.; Han, L. B., General Oxidative Aryl C-P Bond Formation through Palladium-Catalyzed Decarbonylative Coupling of Aroylhydrazides with P(O)H Compounds. *Organic Letters* **2019**, 21 (9), 3198-3203.
- (7) Zhu, D.-L.; Jiang, S.; Wu, Q.; Wang, H.; Chai, L.-L.; Li, H.-Y.; Li, H.-X., Visible-Light-Induced Nickel-Catalyzed P(O)-C(sp<sup>2</sup>) Coupling Using Thioxanthen-9-one as a Photoredox Catalysis. *Organic Letters* **2020**, 23 (1), 160-165.
- (8) Zhao, Y.-L.; Wu, G.-J.; Li, Y.; Gao, L.-X.; Han, F.-S., [NiCl<sub>2</sub>(dppp)]-Catalyzed Cross-Coupling of Aryl Halides with Dialkyl Phosphite, Diphenylphosphine Oxide, and Diphenylphosphine. *Chemistry - A European Journal* **2012**, 18 (31), 9622-9627.
- (9) Niu, M.; Fu, H.; Jiang, Y.; Zhao, Y., Copper-catalyzed addition of H-phosphine oxides to alkynes forming alkenylphosphine oxides. *Chemical Communications* **2007**, (3), 272-274.
- (10) Zhang, J. S.; Chen, T.; Yang, J.; Han, L. B., Nickel-catalysed P-C bond formation via P-H/C-CN cross coupling reactions. *Chemical Communications* **2015**, 51 (35), 7540-2.
- (11) Yang, B.; Wang, Z.-X., Ni-Catalyzed C-P Coupling of Aryl, Benzyl, or Allyl Ammonium Salts with P(O)H Compounds. *The Journal of Organic Chemistry* **2019**, 84 (3), 1500-1509.
- (12) Liu, D.; Ren, H.; Deng, L.; Zhang, T., Synthesis and Electrophosphorescence of Iridium Complexes Containing Benzothiazole-Based Ligands. *ACS Applied Materials & Interfaces* **2013**, 5 (11), 4937-4944.
- (13) Chen, C. W.; Chen, Y. L.; Reddy, D. M.; Du, K.; Li, C. E.; Shih, B. H.; Xue, Y. J.; Lee, C. F., CuI/Oxalic Diamide-Catalyzed Cross-Coupling of Thiols with Aryl Bromides and Chlorides. *Chemistry - A European Journal* **2017**, 23 (42), 10087-10091.
- (14) Chen, C.-K.; Chen, Y.-W.; Lin, C.-H.; Lin, H.-P.; Lee, C.-F., Synthesis of CuO on mesoporous silica and its applications for coupling reactions of thiols with aryl iodides. *Chemical Communications* **2010**, 46 (2), 282-284.
- (15) Yoshida, S.; Nagai, A.; Uchida, K.; Hosoya, T., Enhancing the Synthetic Utility of 3-Haloaryne Intermediates by Their Efficient Generation from Readily Synthesizable ortho-Iodoaryl Triflate-type Precursors. *Chemistry Letters* **2017**, 46 (5), 733-736.
- (16) Liu, T. J.; Yi, C. L.; Chan, C. C.; Lee, C. F., Manganese-catalyzed cross-coupling of thiols with aryl



- iodides. *Chemistry - An Asian Journal* **2013**, 8 (5), 1029-34.
- (17) Wang, S. F.; Li, C. E.; Liu, Y. C.; Mallikarjuna Reddy, D.; Sidick Basha, R.; Park, J. K.; Lee, S.; Lee, C. F., Palladium-Catalyzed Decarbonylative Thioetherification of 2-Pyridyl Thioesters. *Asian Journal of Organic Chemistry* **2020**, 9 (11), 1826-1833.
- (18) Mitrofanov, A. Y.; Murashkina, A. V.; Martín-García, I.; Alonso, F.; Beletskaya, I. P., Formation of C–C, C–S and C–N bonds catalysed by supported copper nanoparticles. *Catalysis Science & Technology* **2017**, 7 (19), 4401-4412.

## 9. Copies of NMR spectra

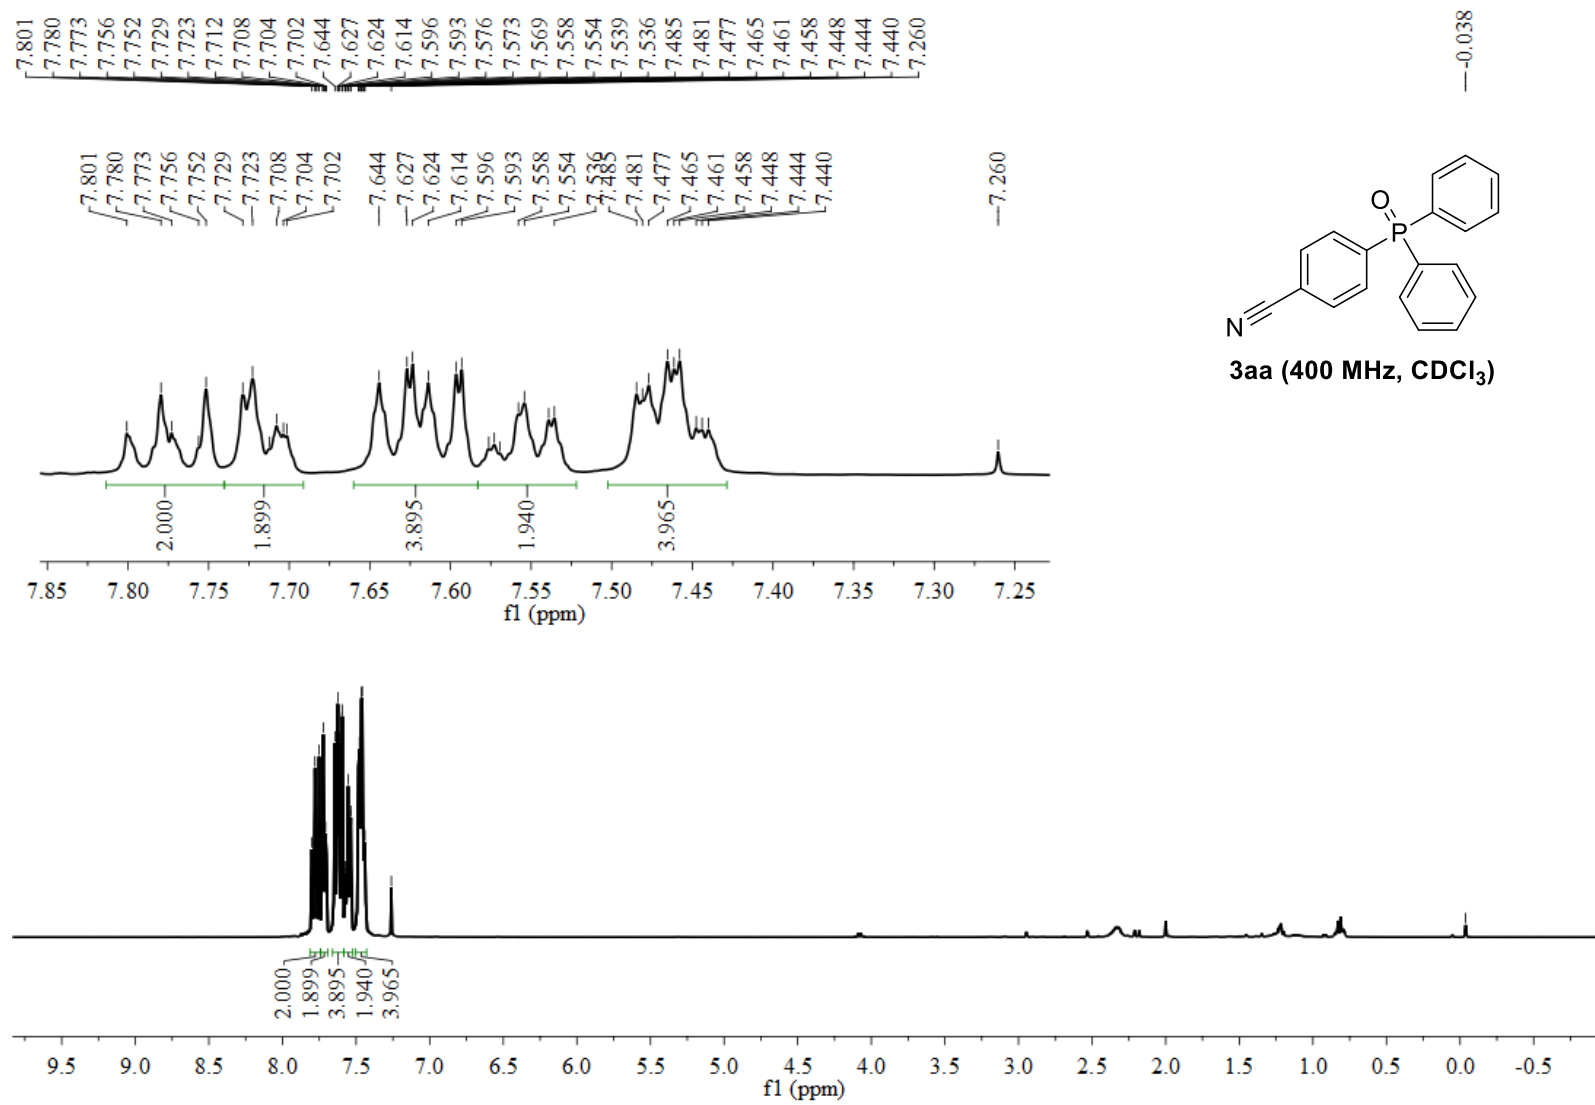

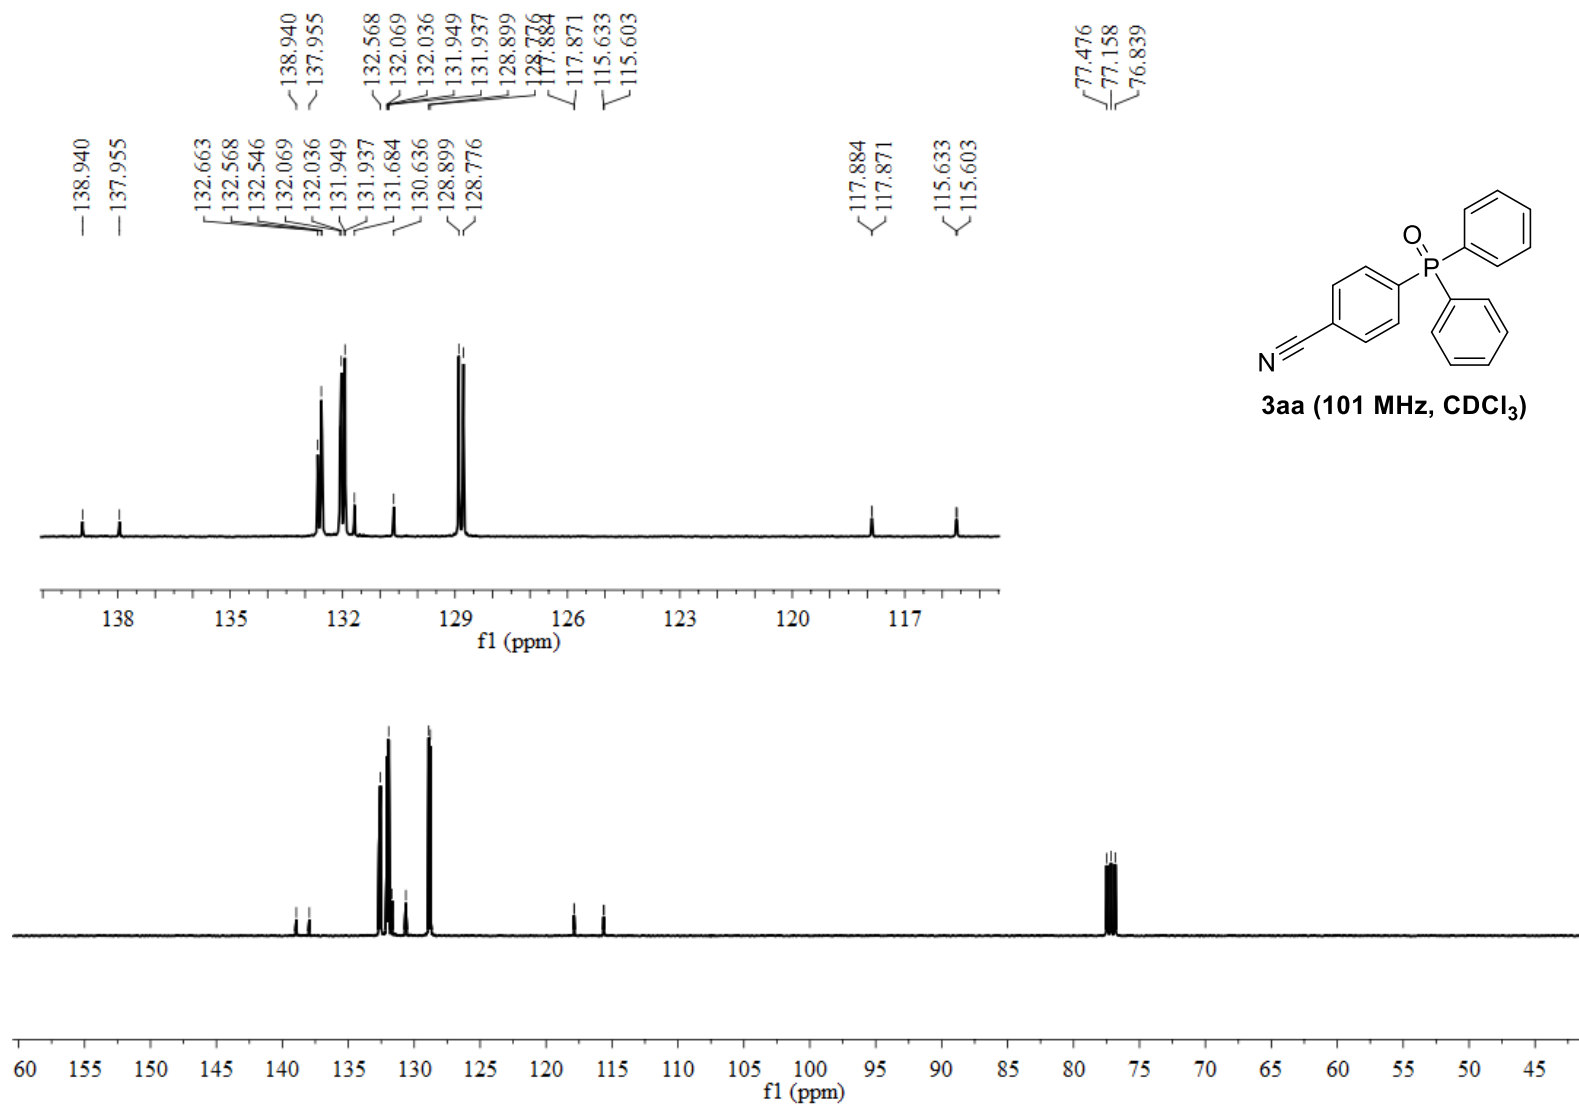

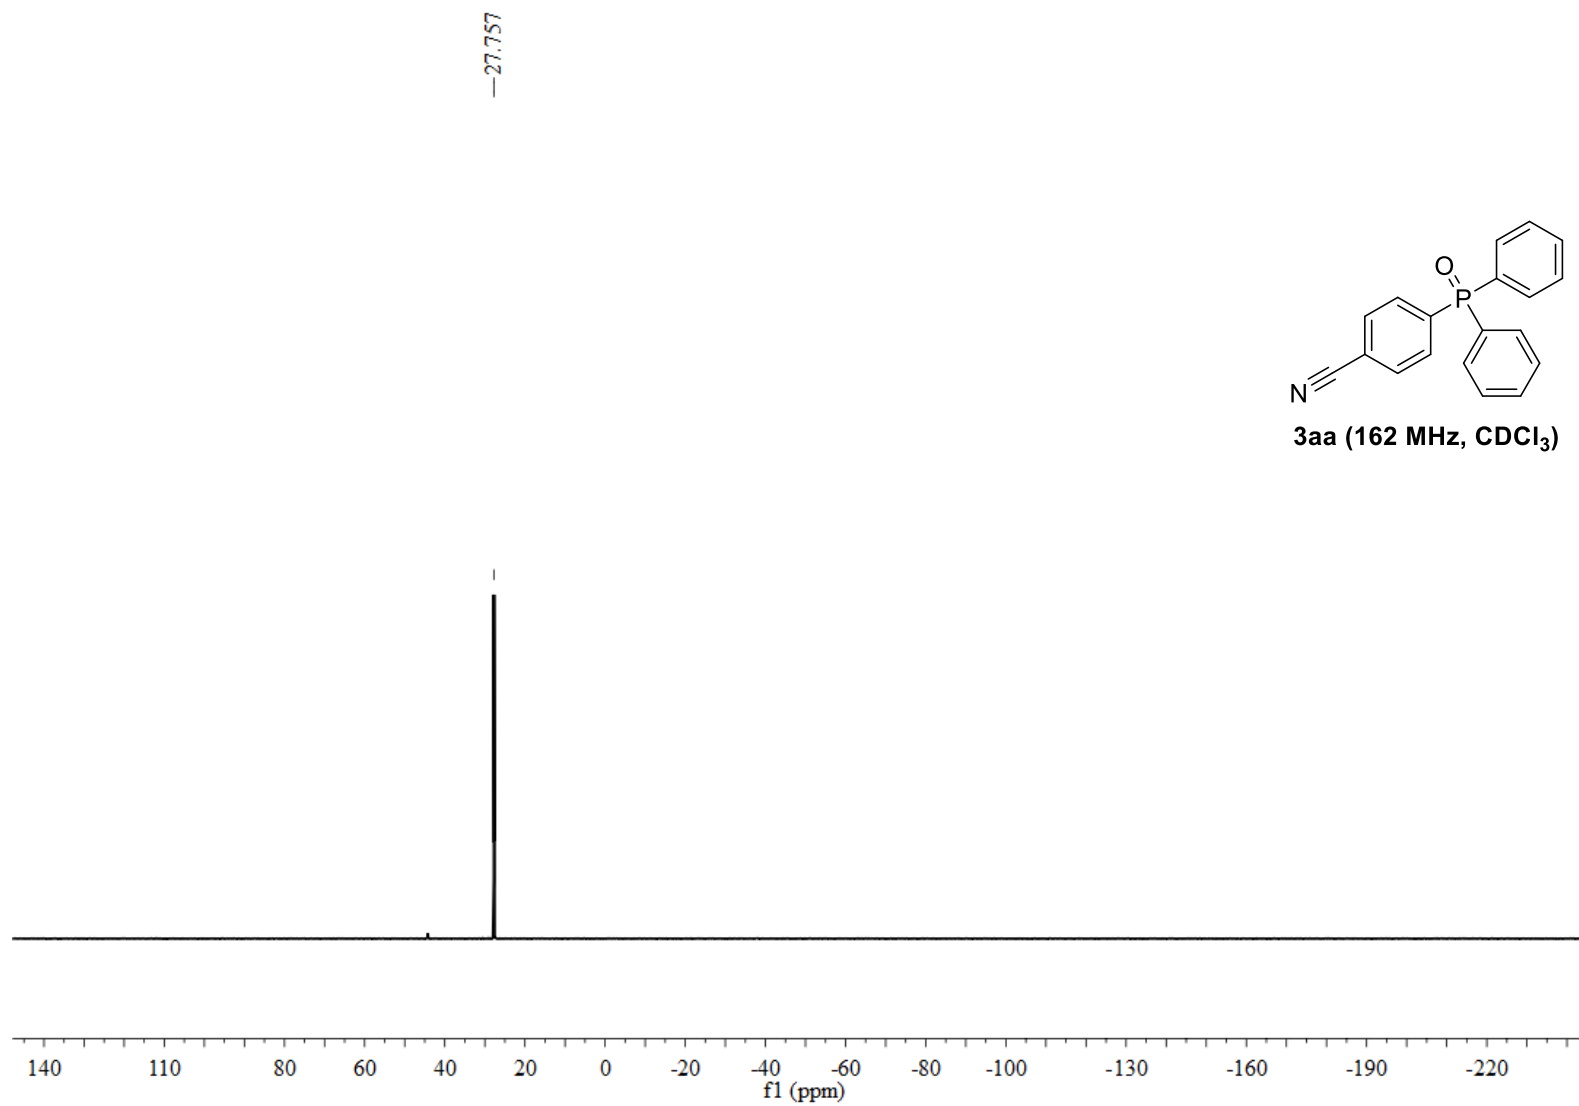

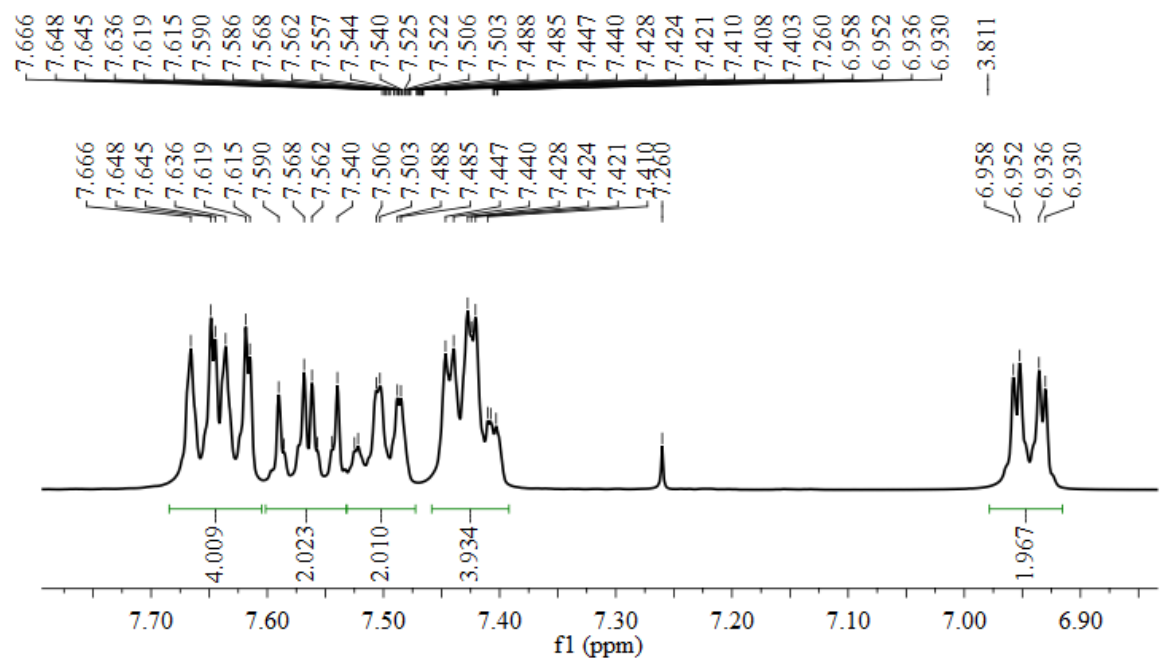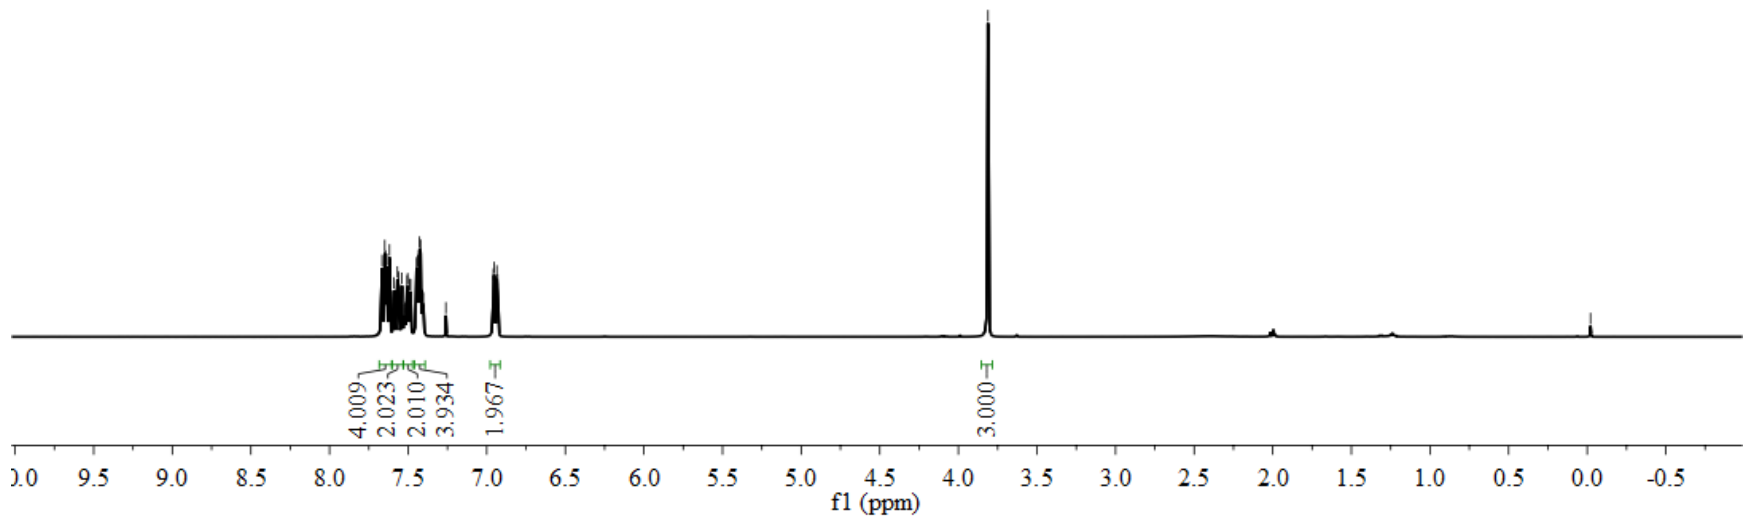

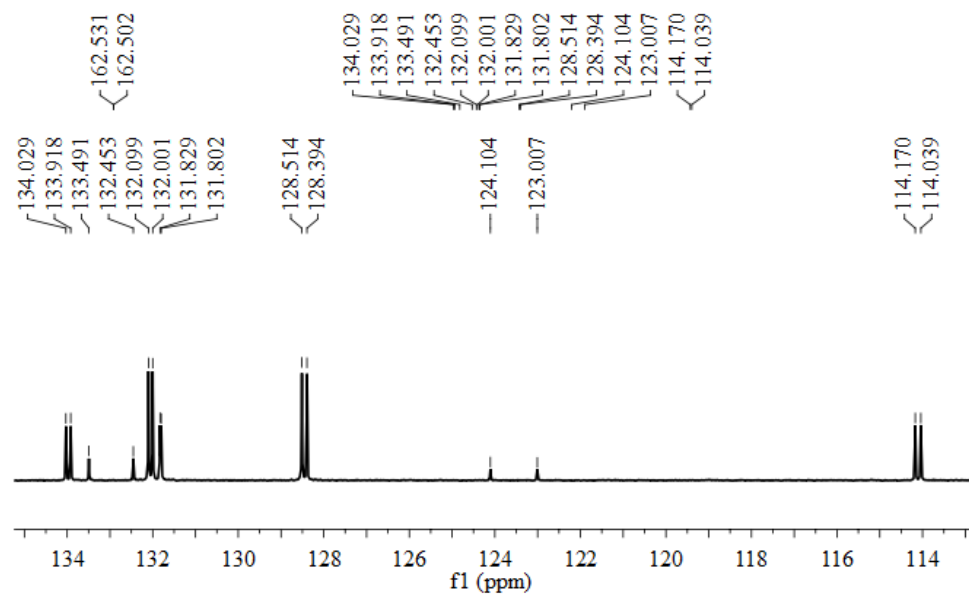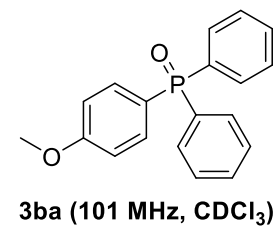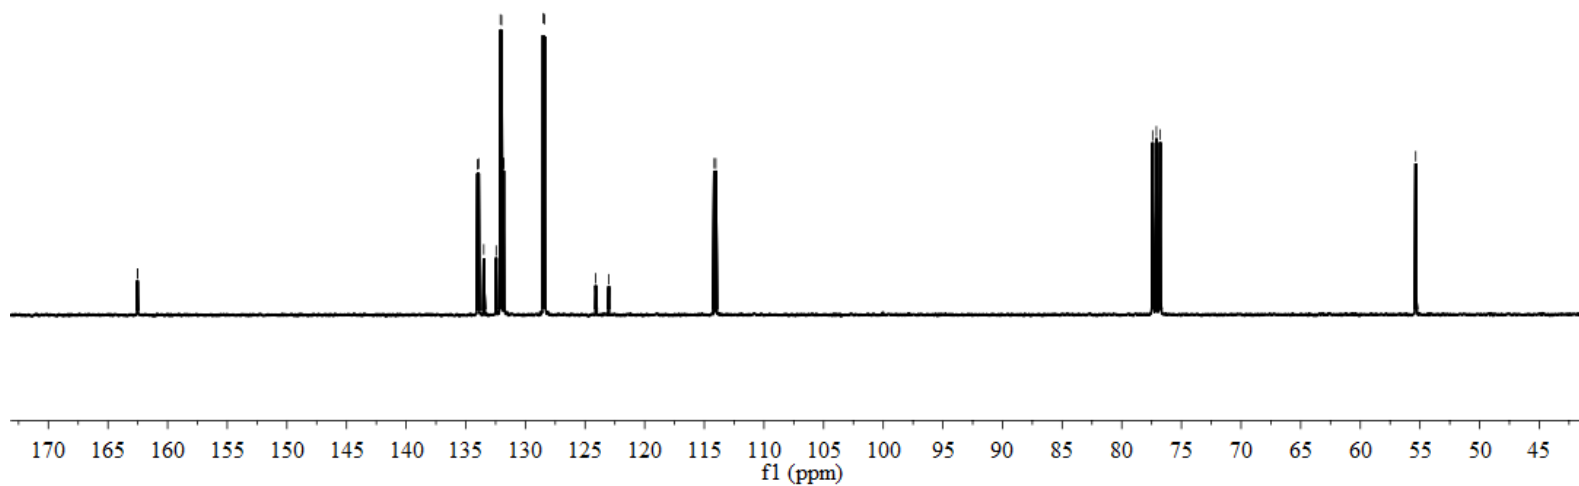

—29.042

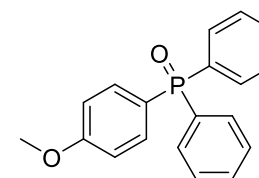

**3ba (162 MHz, CDCl<sub>3</sub>)**

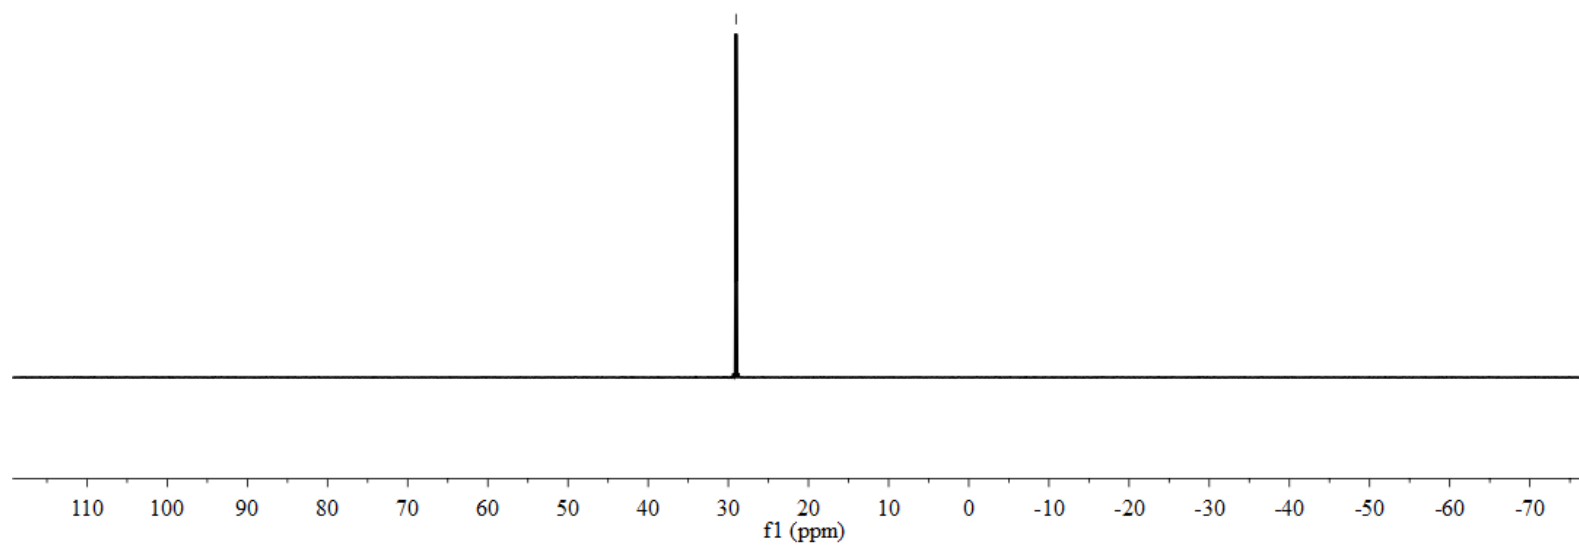



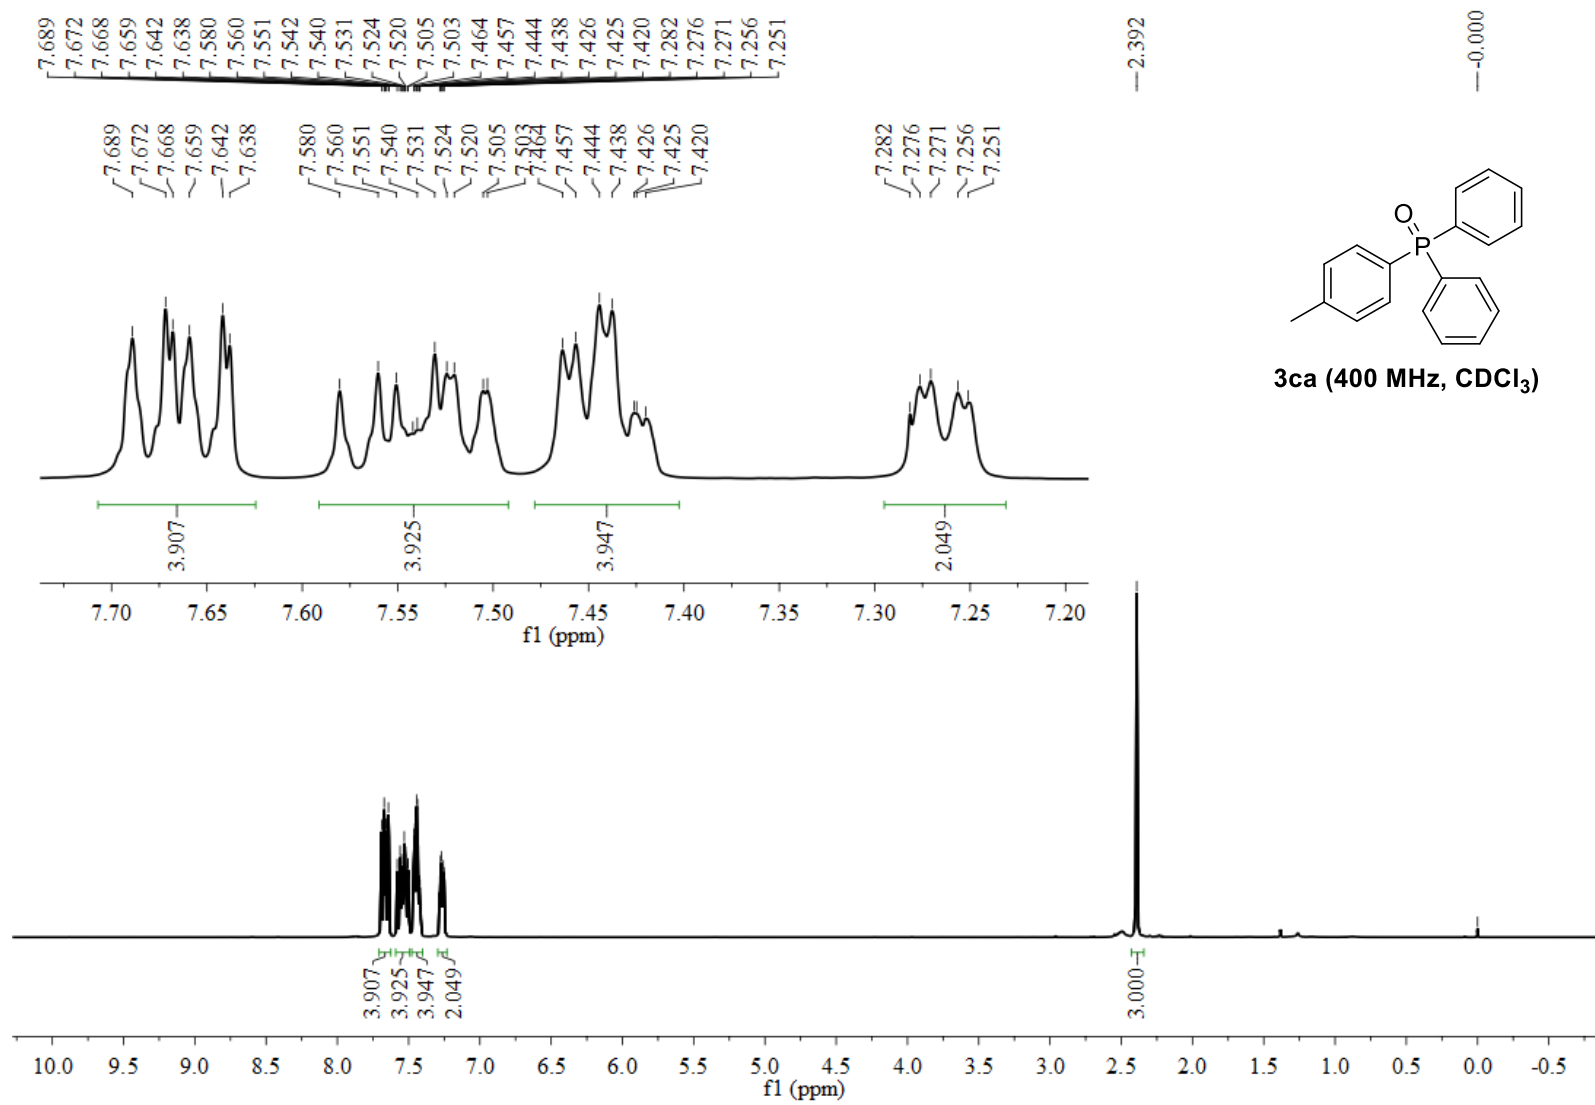

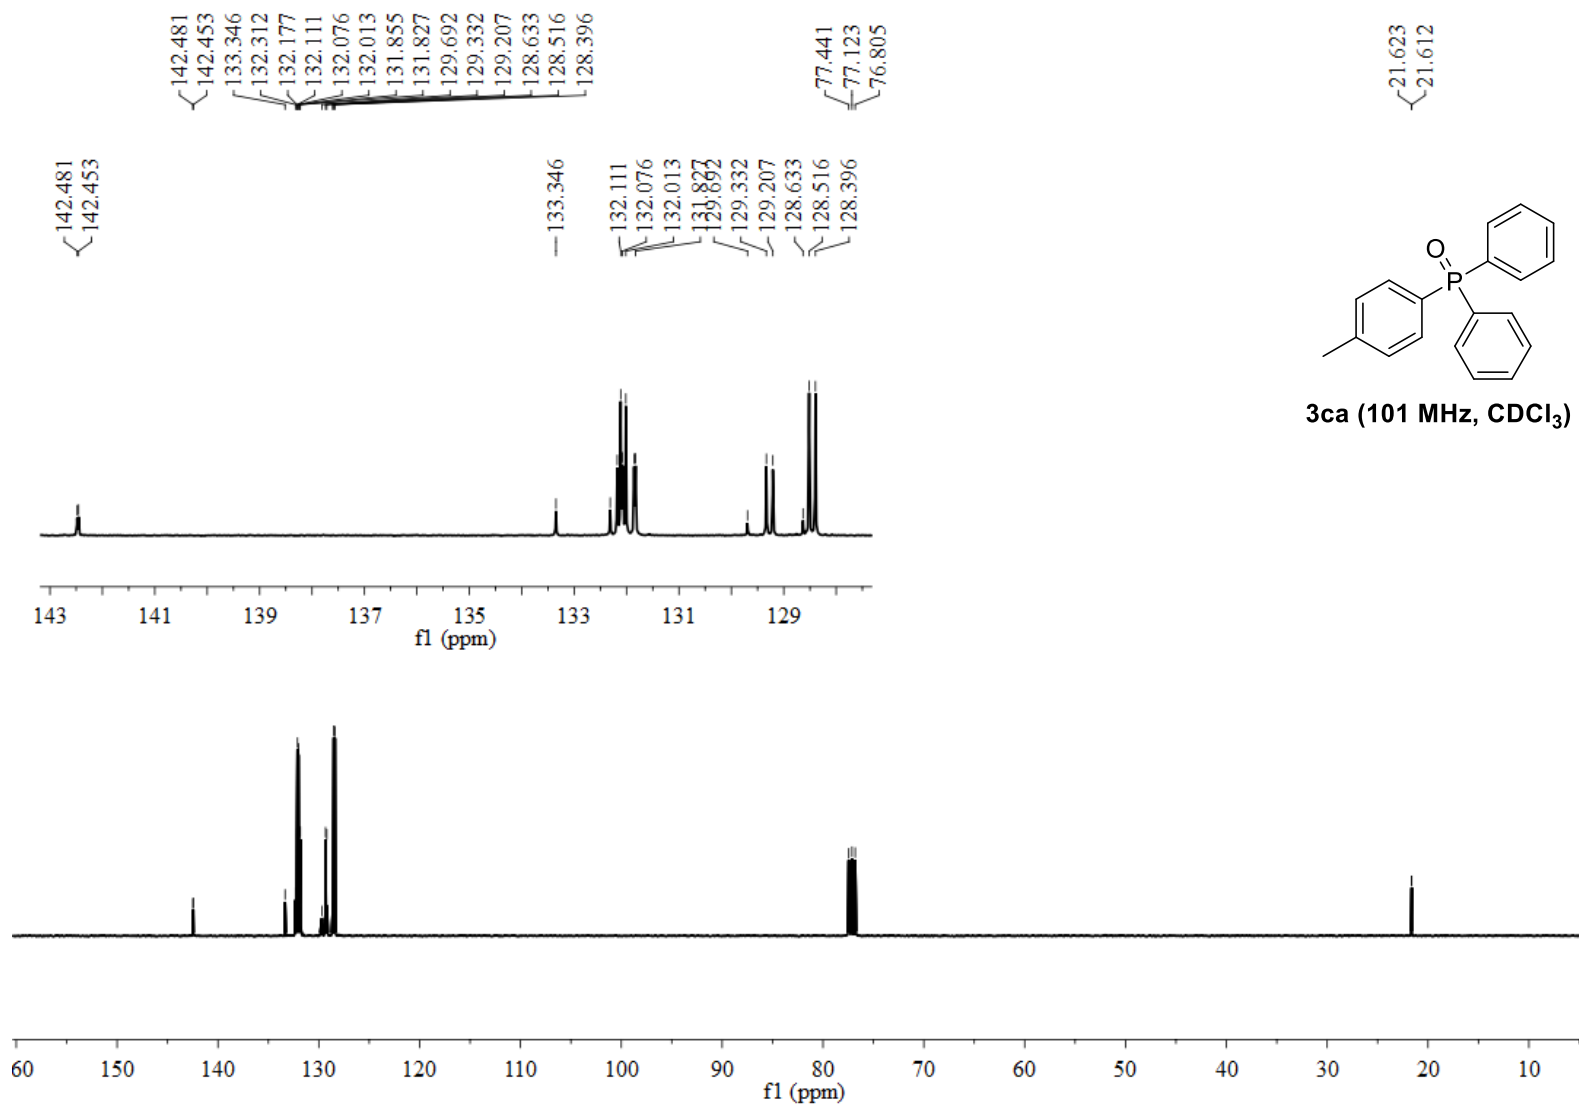

-29.197

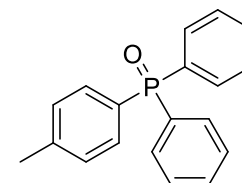

3ca (162 MHz, CDCl<sub>3</sub>)

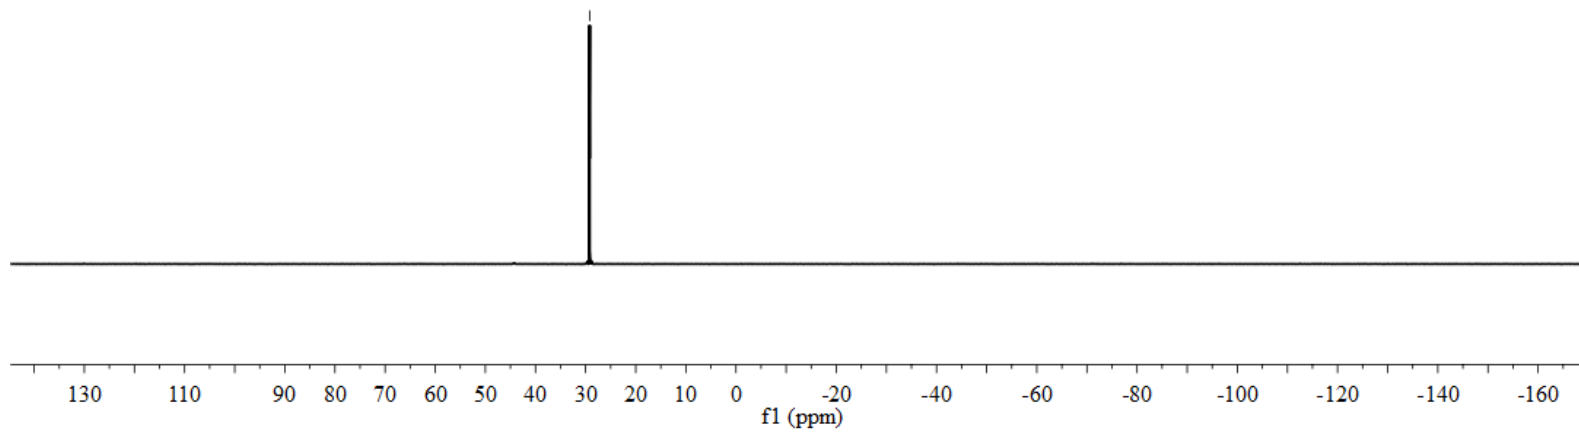

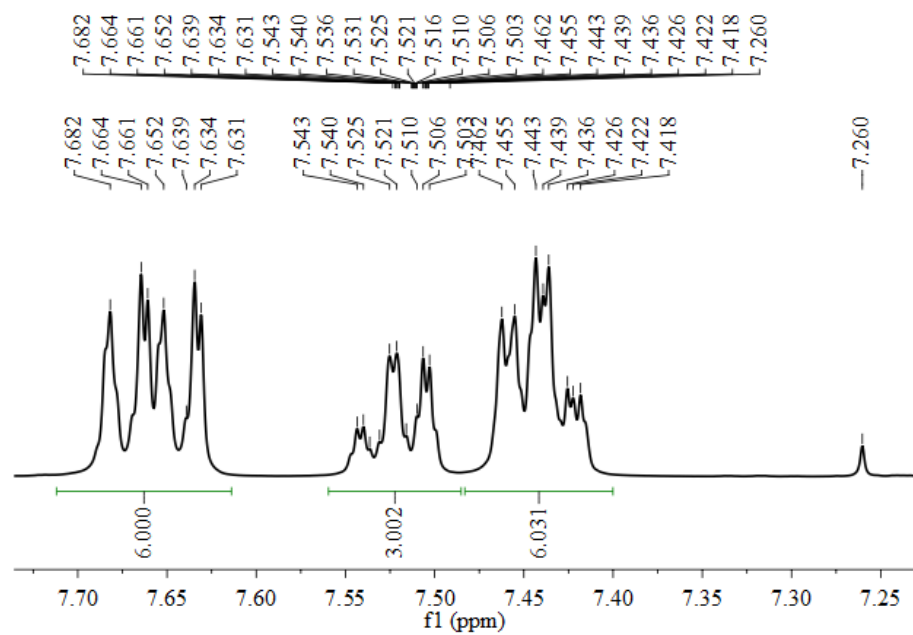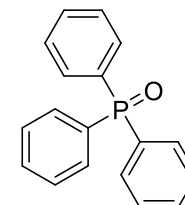

3da (400 MHz, CDCl<sub>3</sub>)

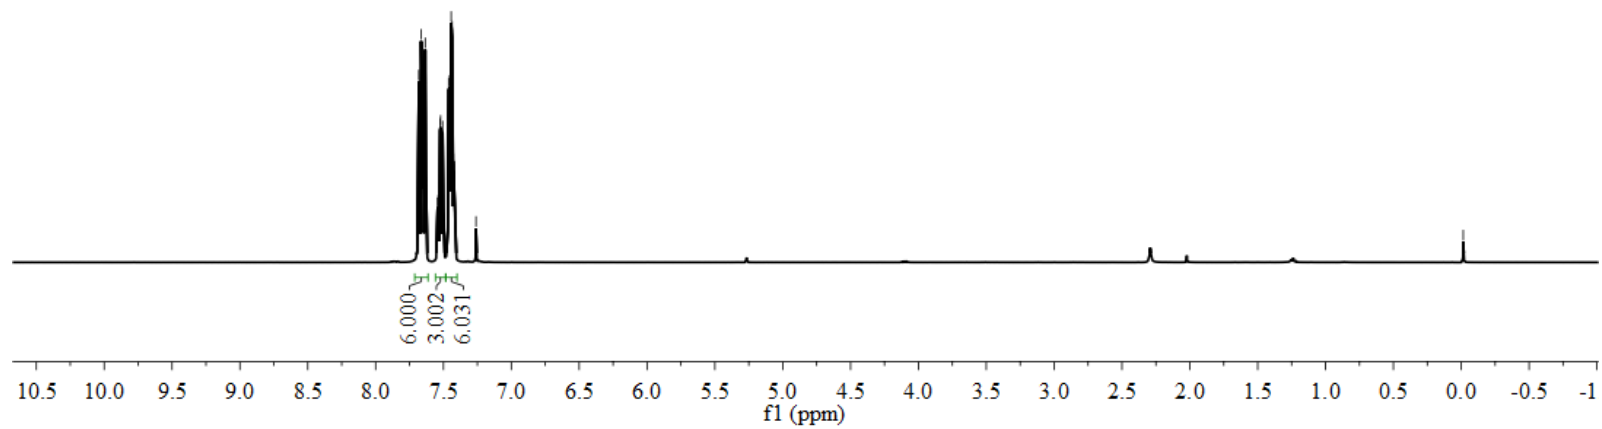

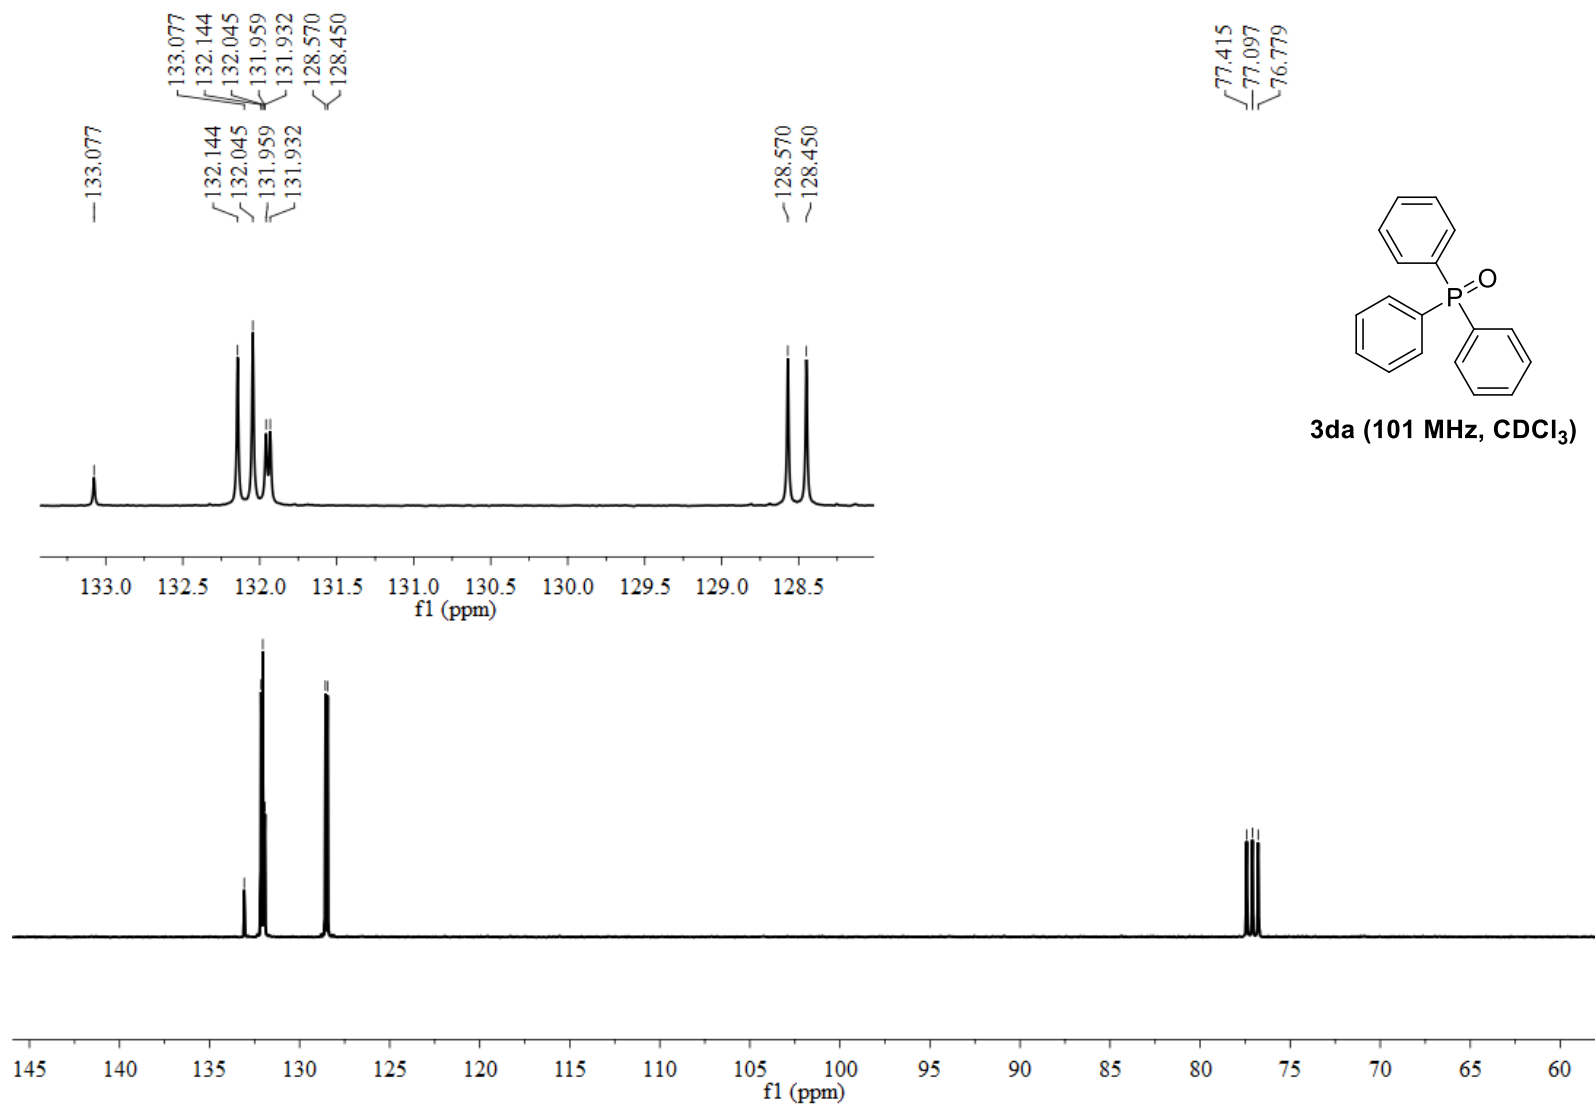

-29.083

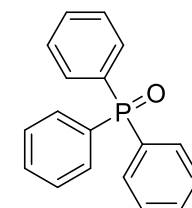

3da (162 MHz, CDCl<sub>3</sub>)

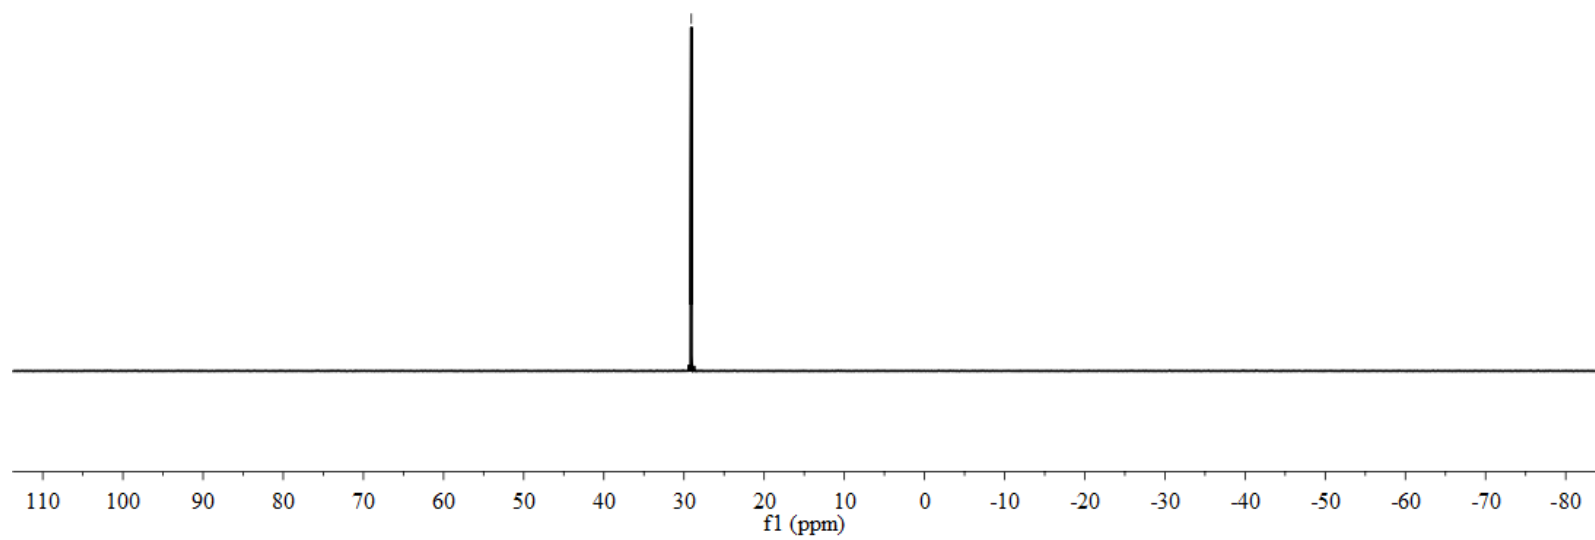

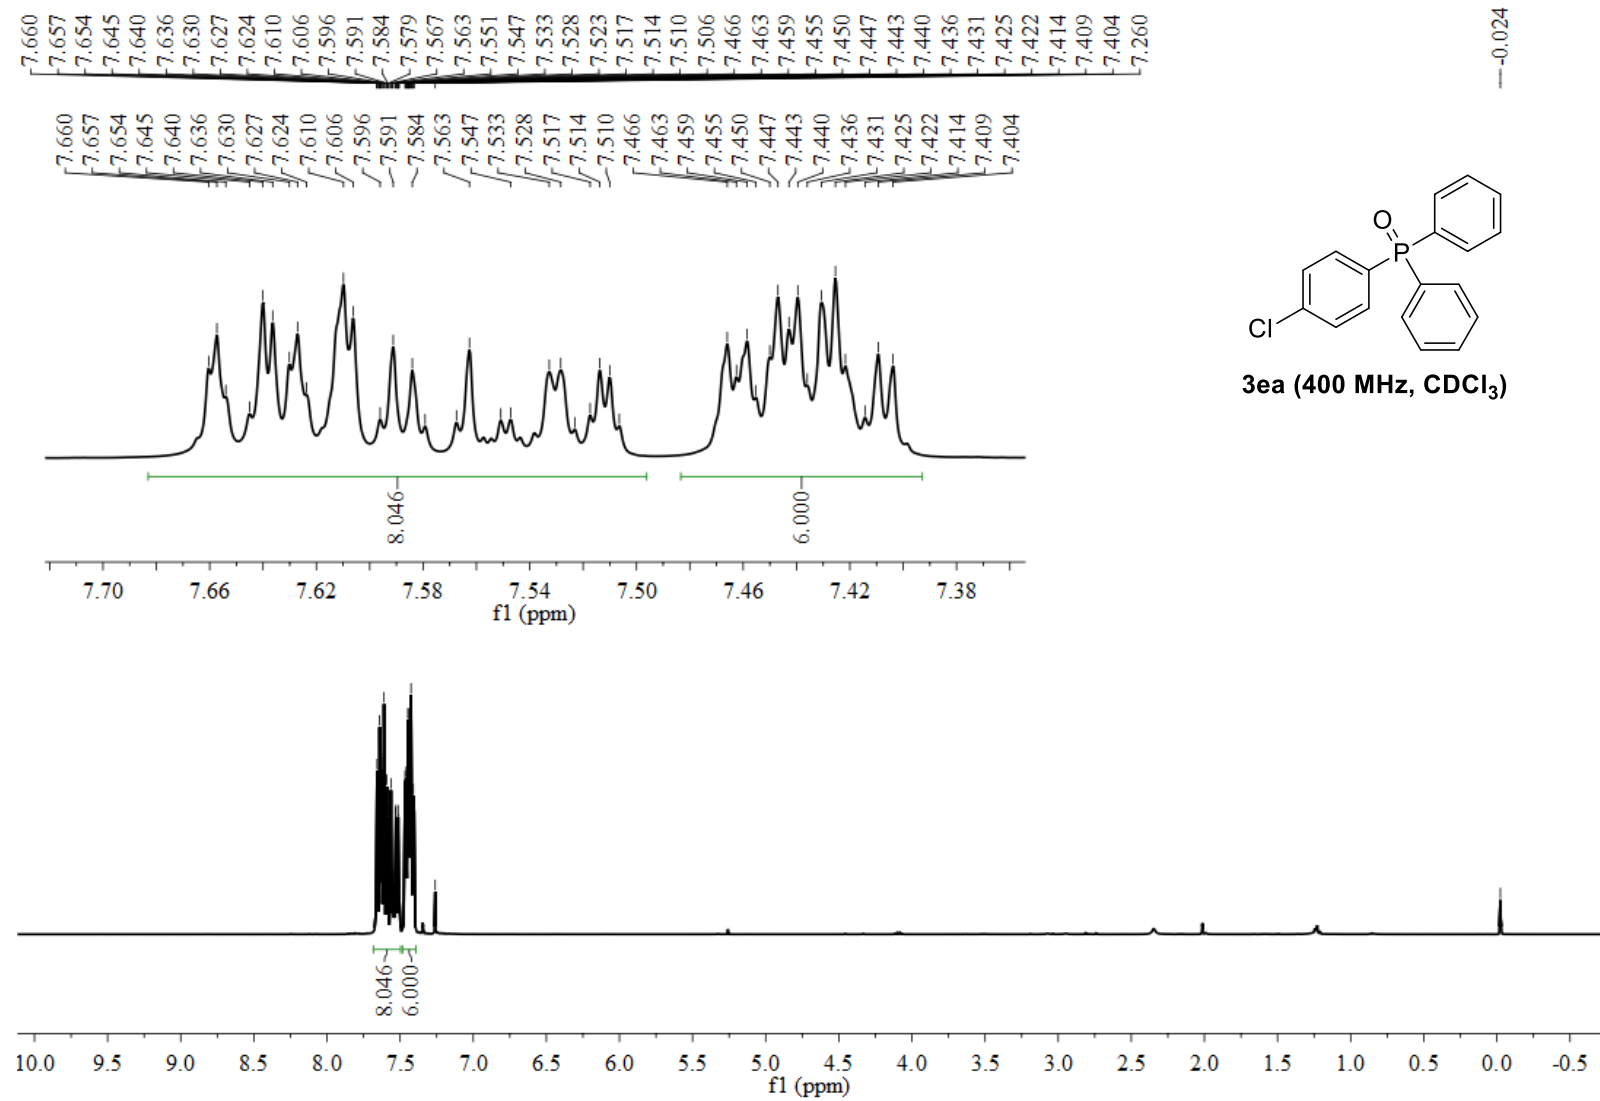

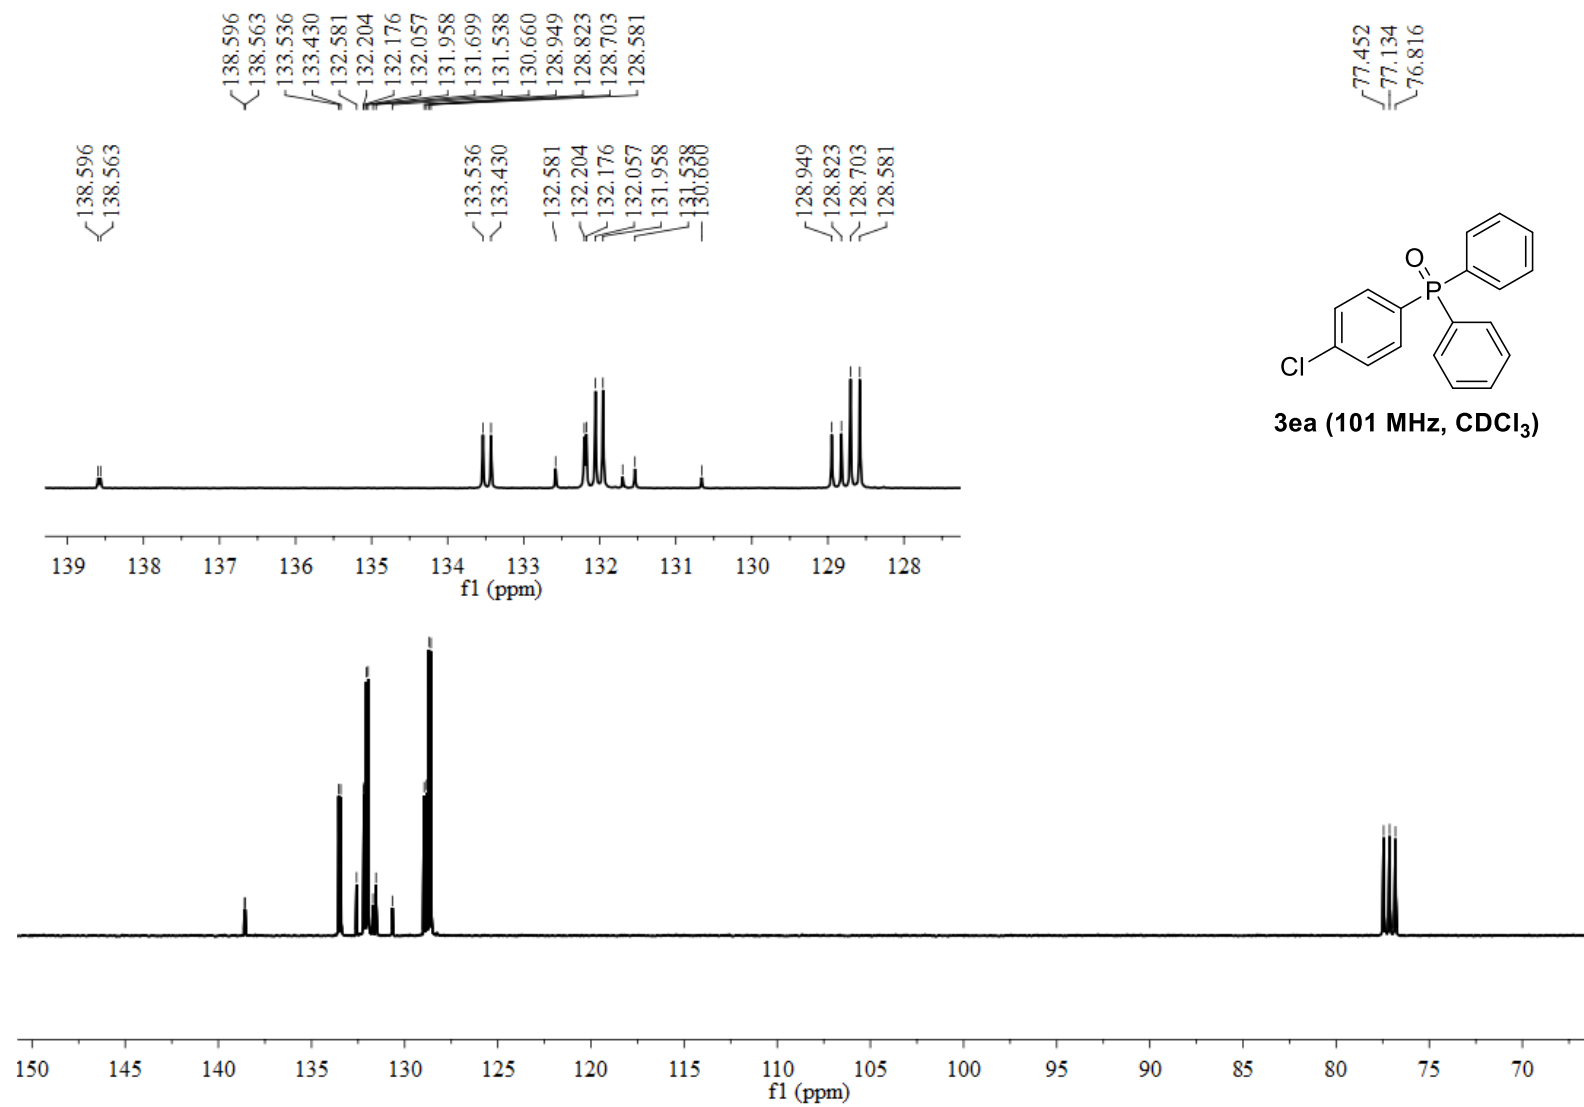



—28.405

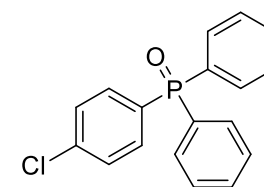

**3ea** (162 MHz, CDCl<sub>3</sub>)

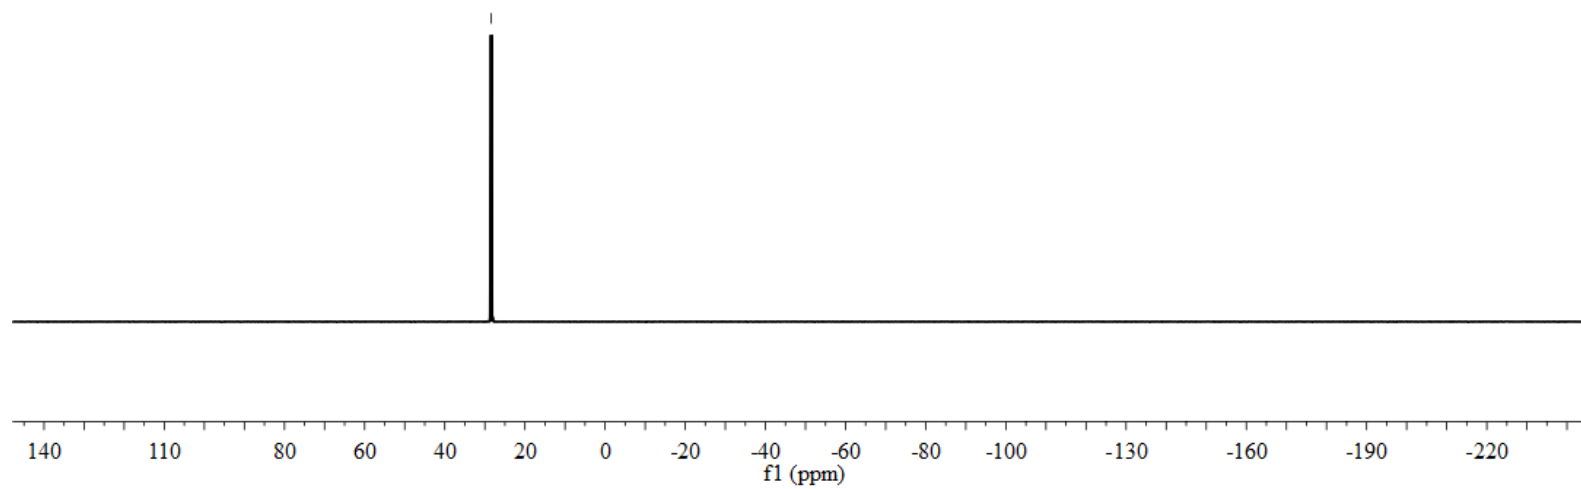

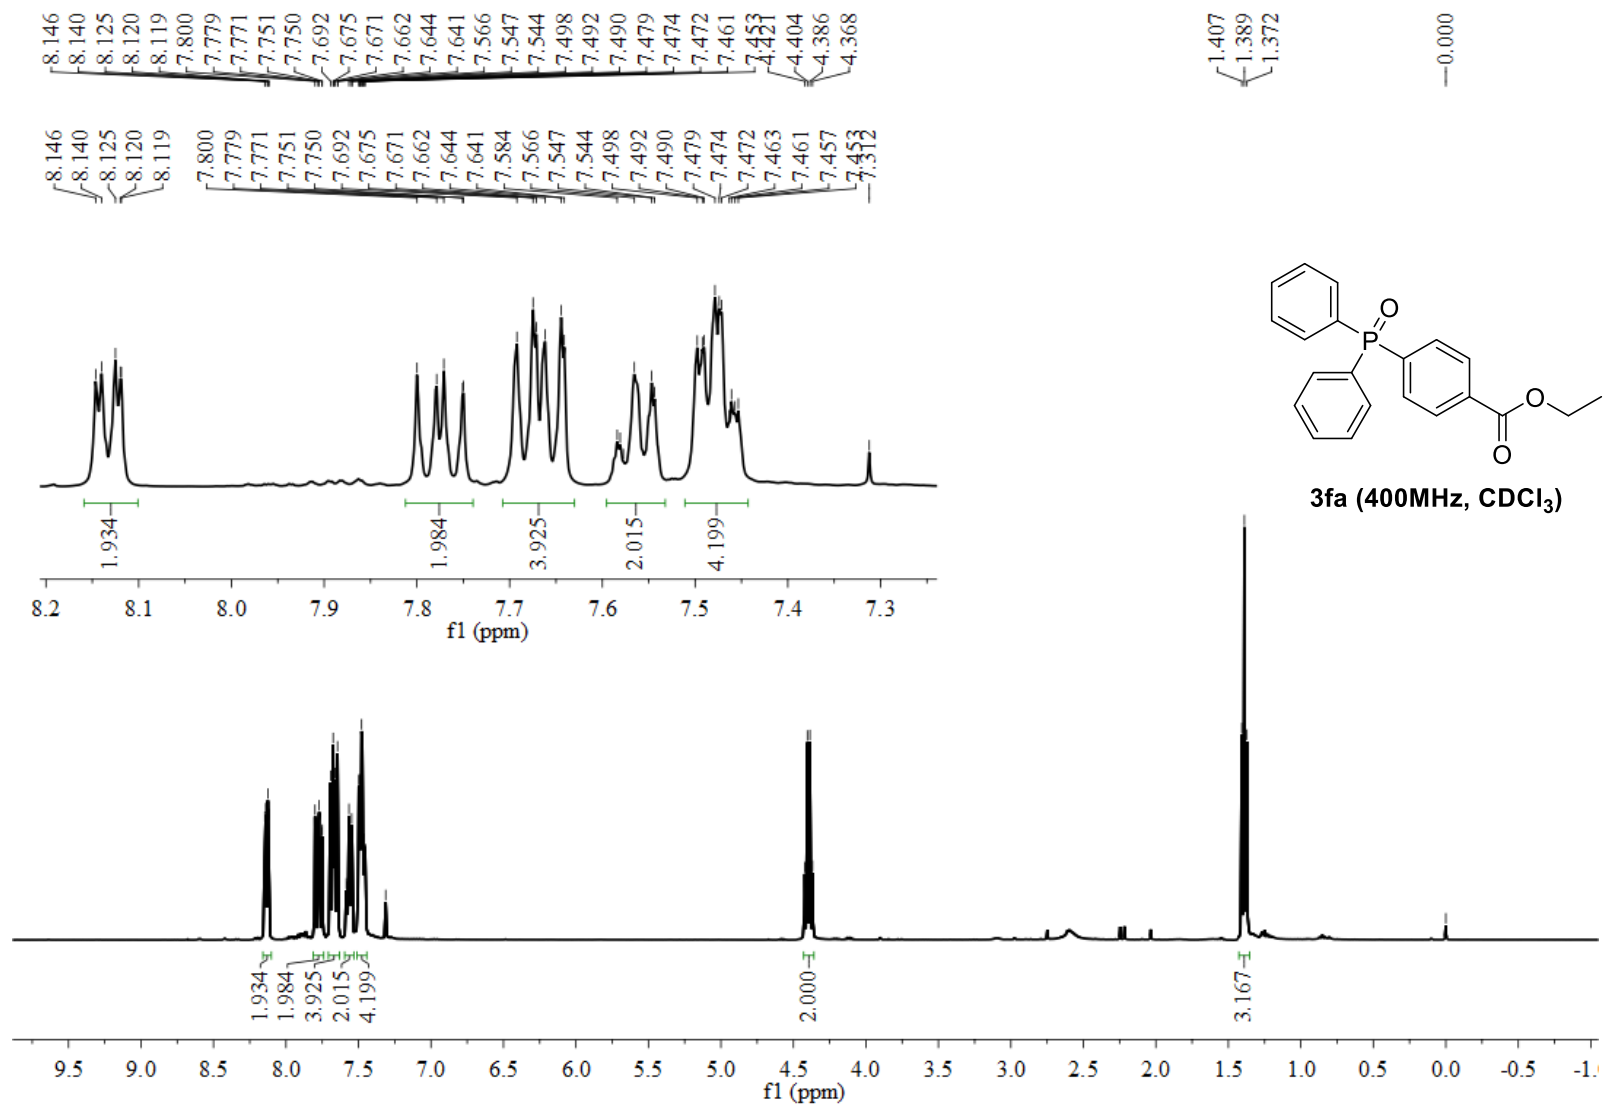

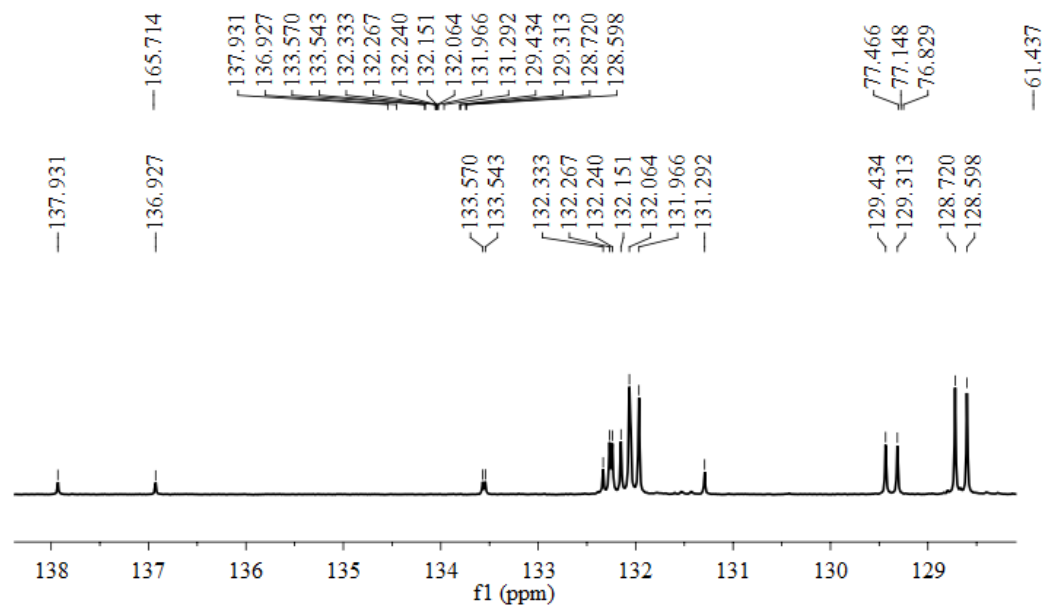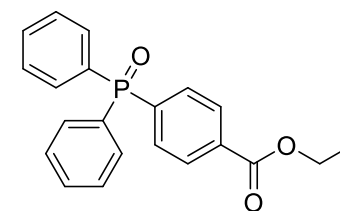

**3fa (101MHz, CDCl<sub>3</sub>)**

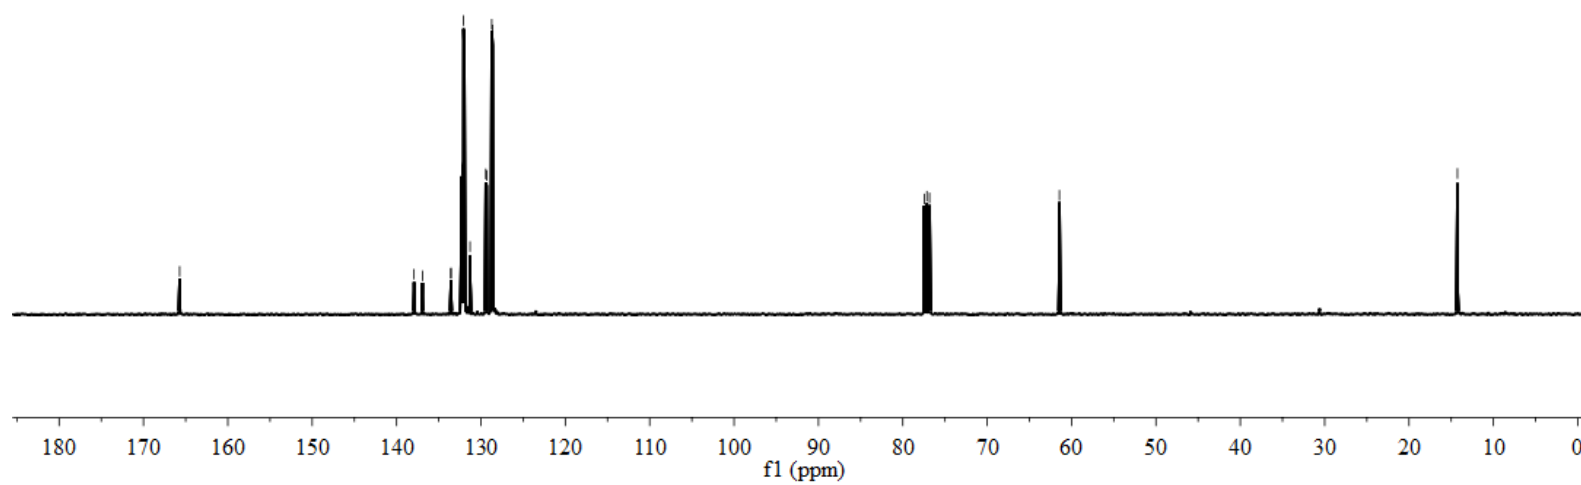

—28.480

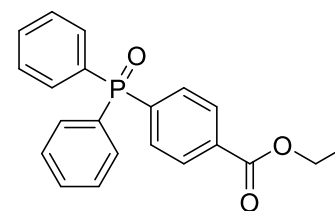

**3fa (162MHz, CDCl<sub>3</sub>)**

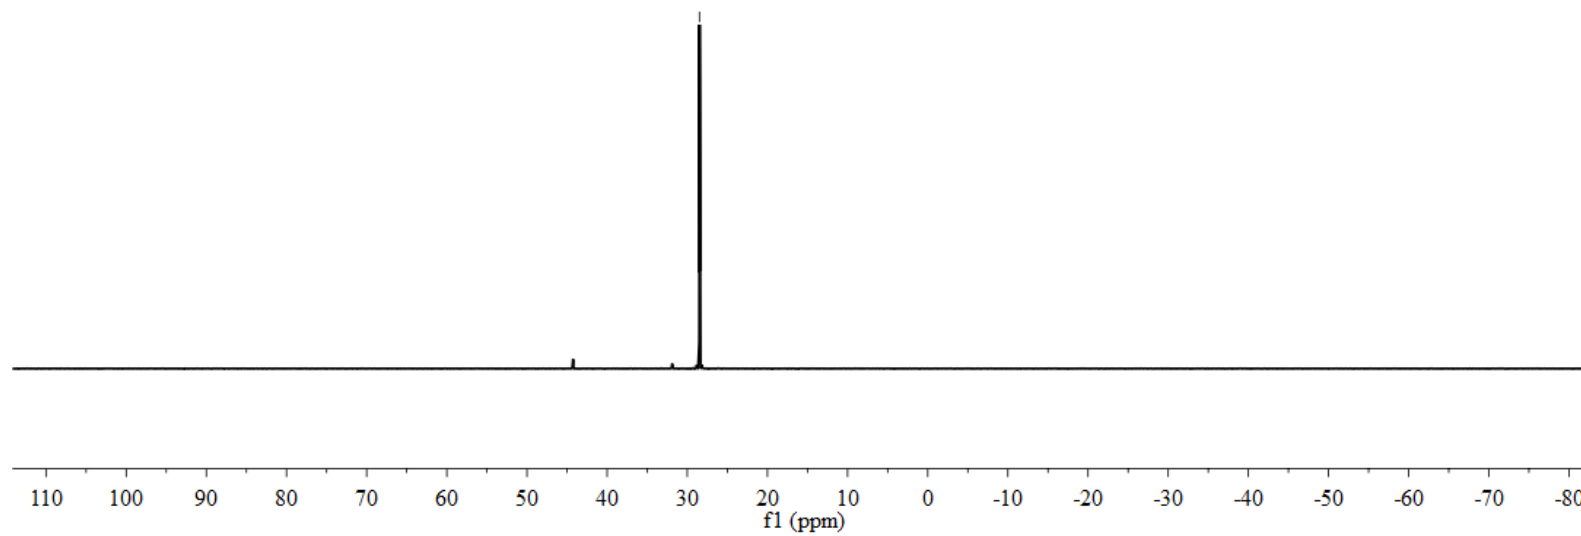

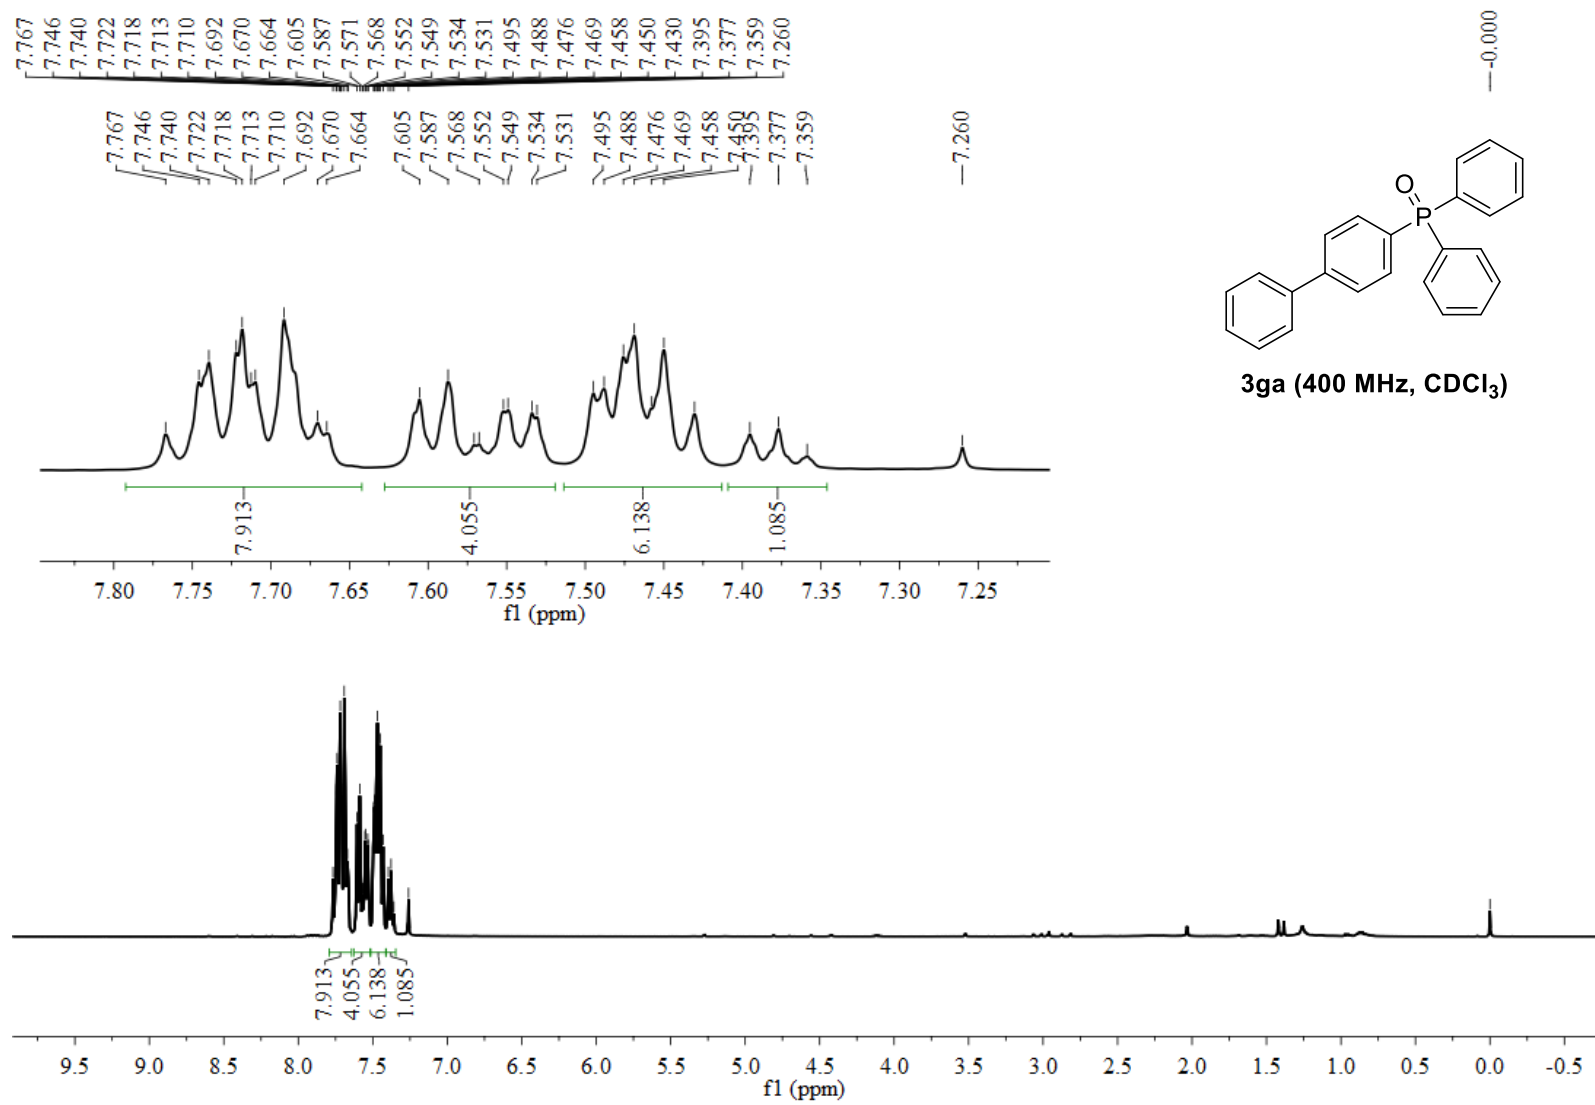

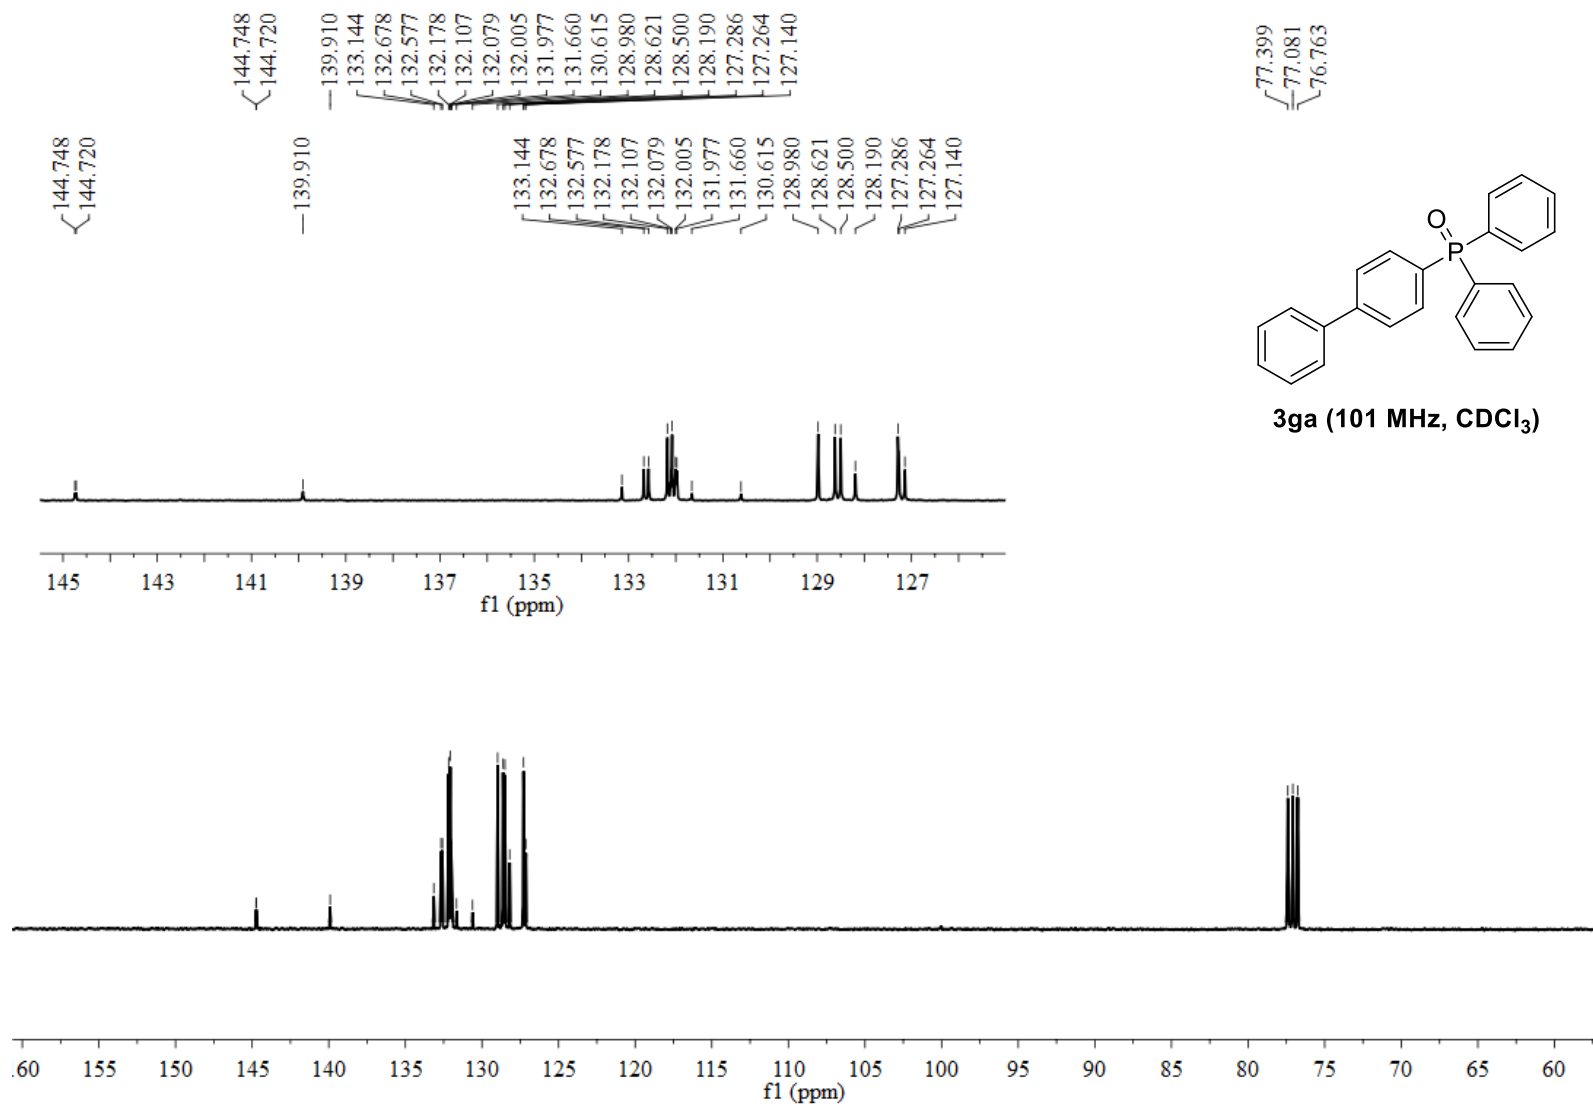

—28.966

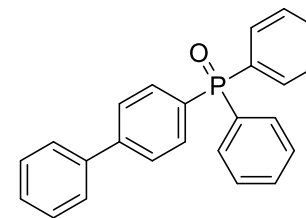

**3ga (162 MHz, CDCl<sub>3</sub>)**

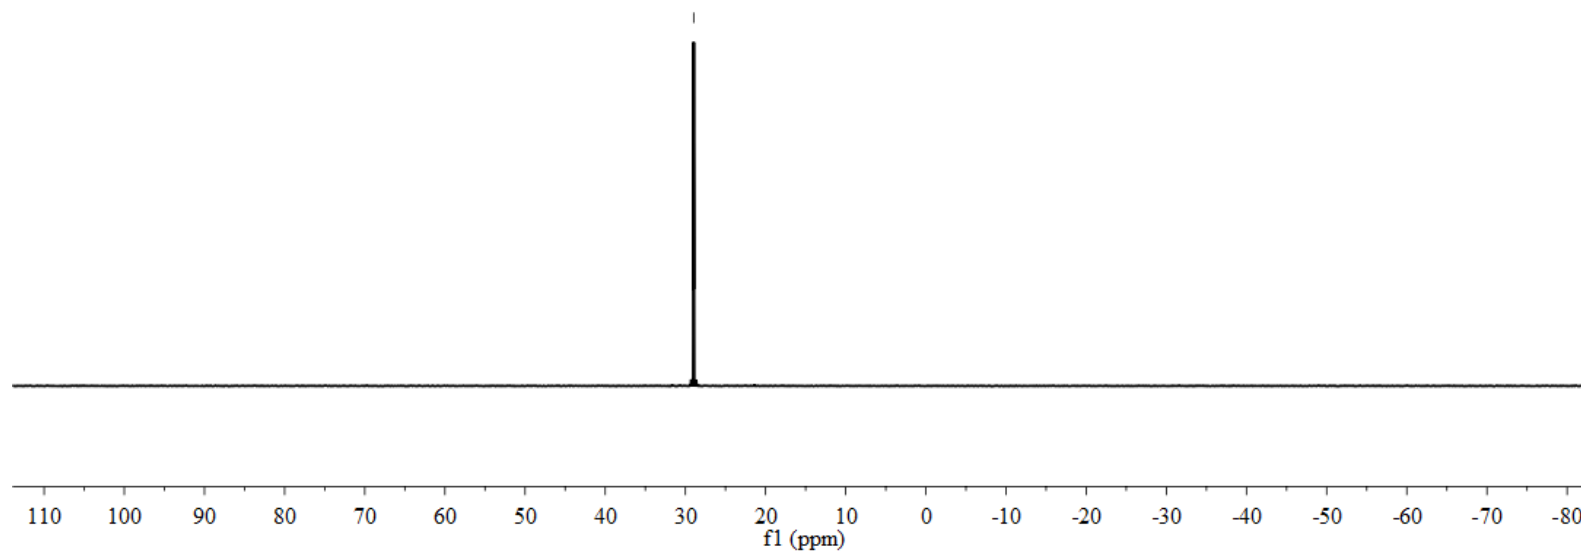

8.047  
8.046  
8.040  
8.025  
8.019  
7.735  
7.714  
7.706  
7.685  
7.644  
7.627  
7.623  
7.614  
7.596  
7.593  
7.535  
7.532  
7.523  
7.517  
7.513  
7.508  
7.502  
7.498  
7.495  
7.448  
7.445  
7.441  
7.429  
7.425  
7.422  
7.411  
7.408  
7.404  
7.260

8.047  
8.046  
8.040  
8.025  
8.019  
7.735  
7.714  
7.706  
7.685  
7.644  
7.627  
7.623  
7.614  
7.596  
7.593  
7.517  
7.513  
7.498  
7.495  
7.448  
7.445  
7.441  
7.429  
7.425  
7.422

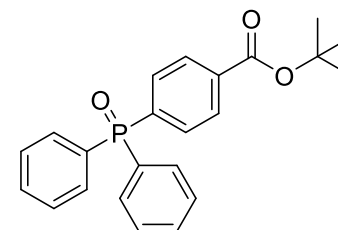

3ha (400 MHz, CDCl<sub>3</sub>)

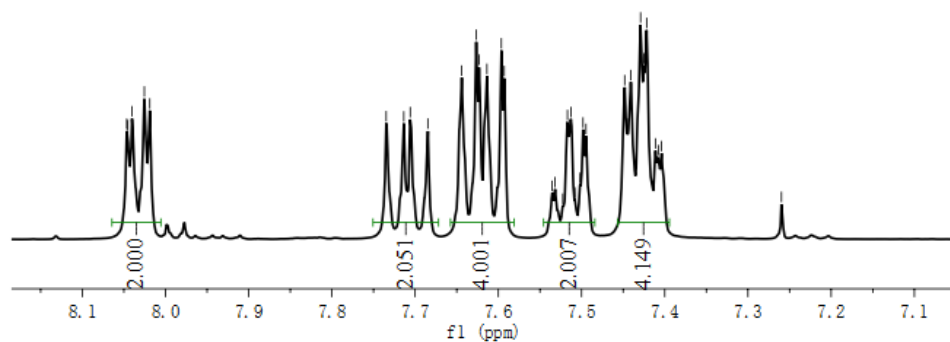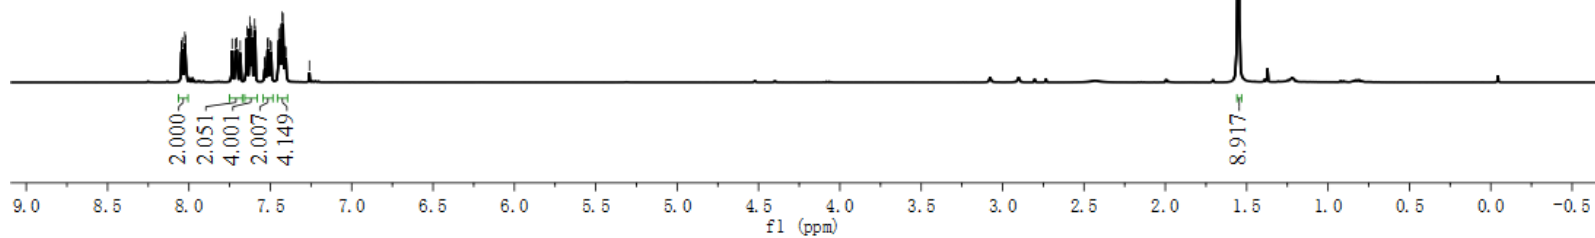



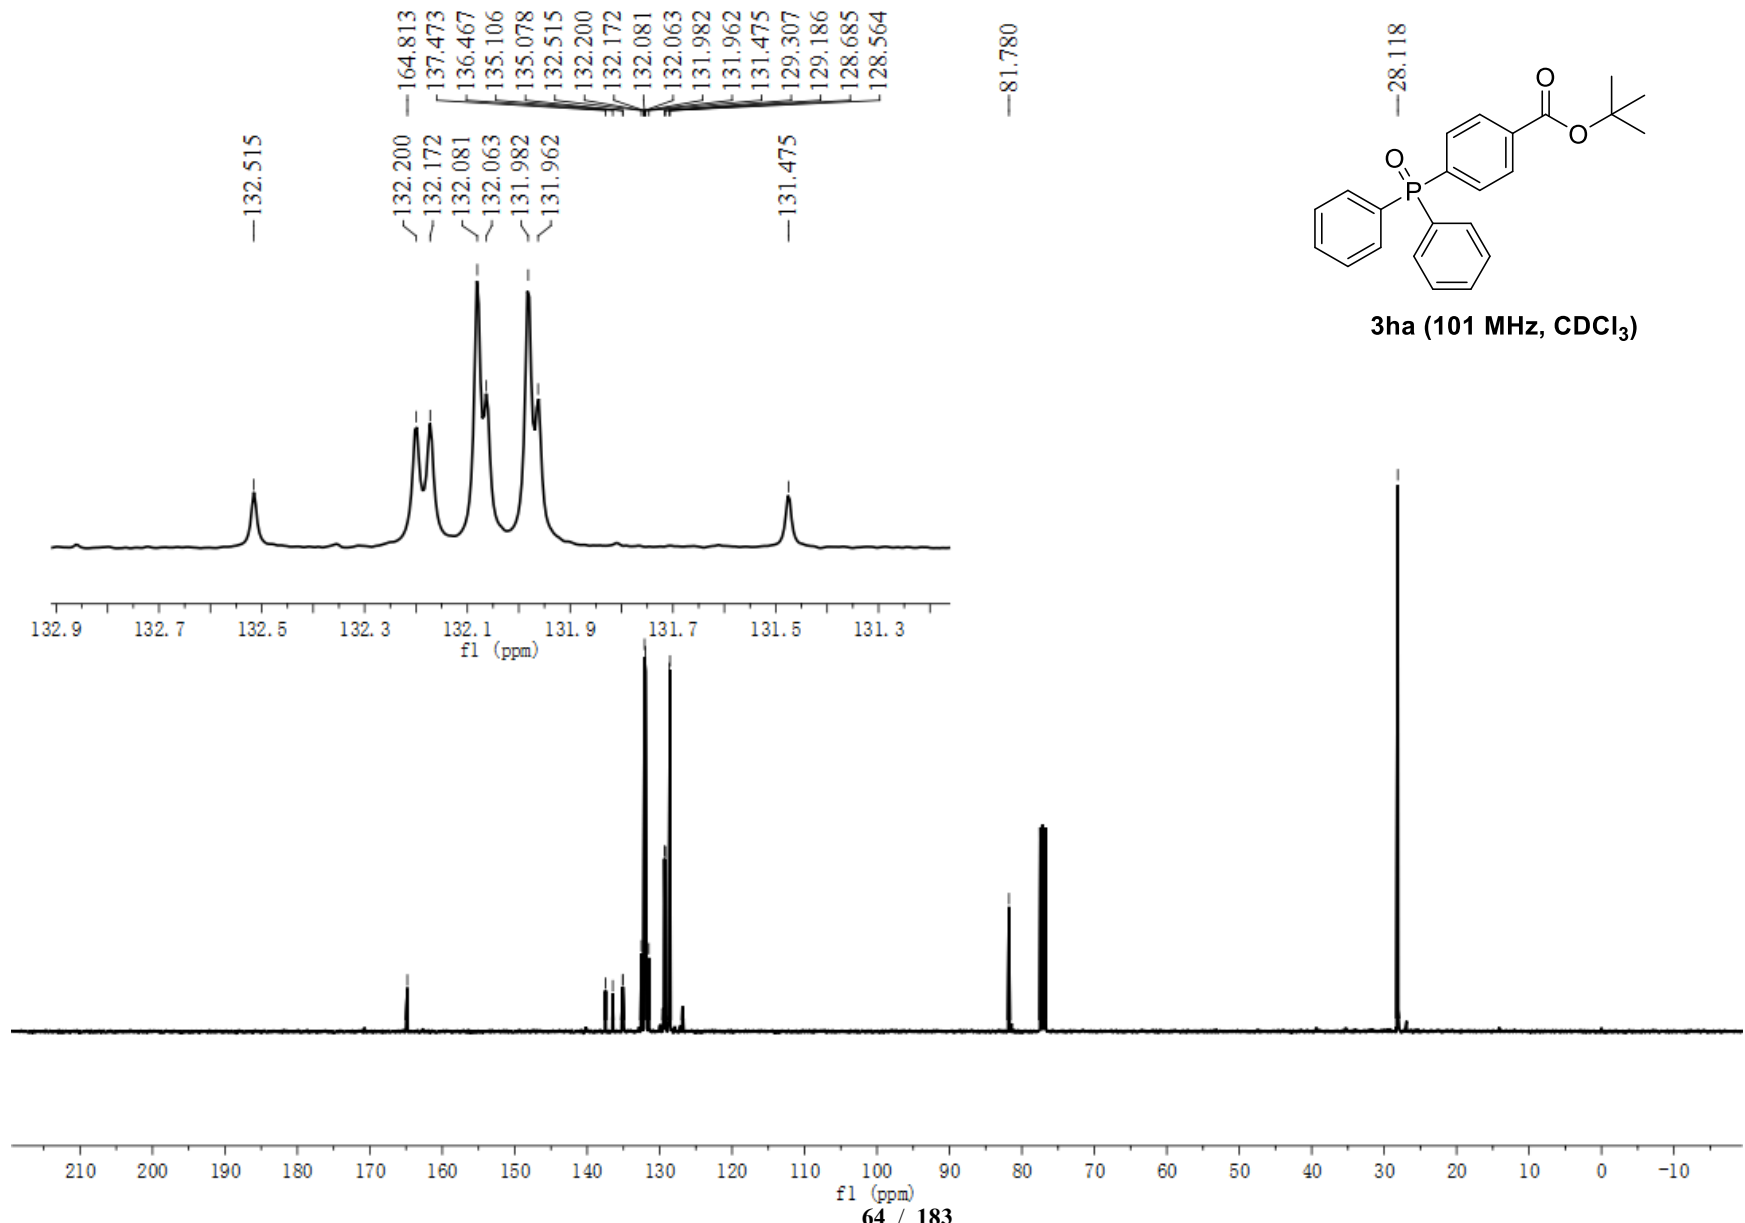

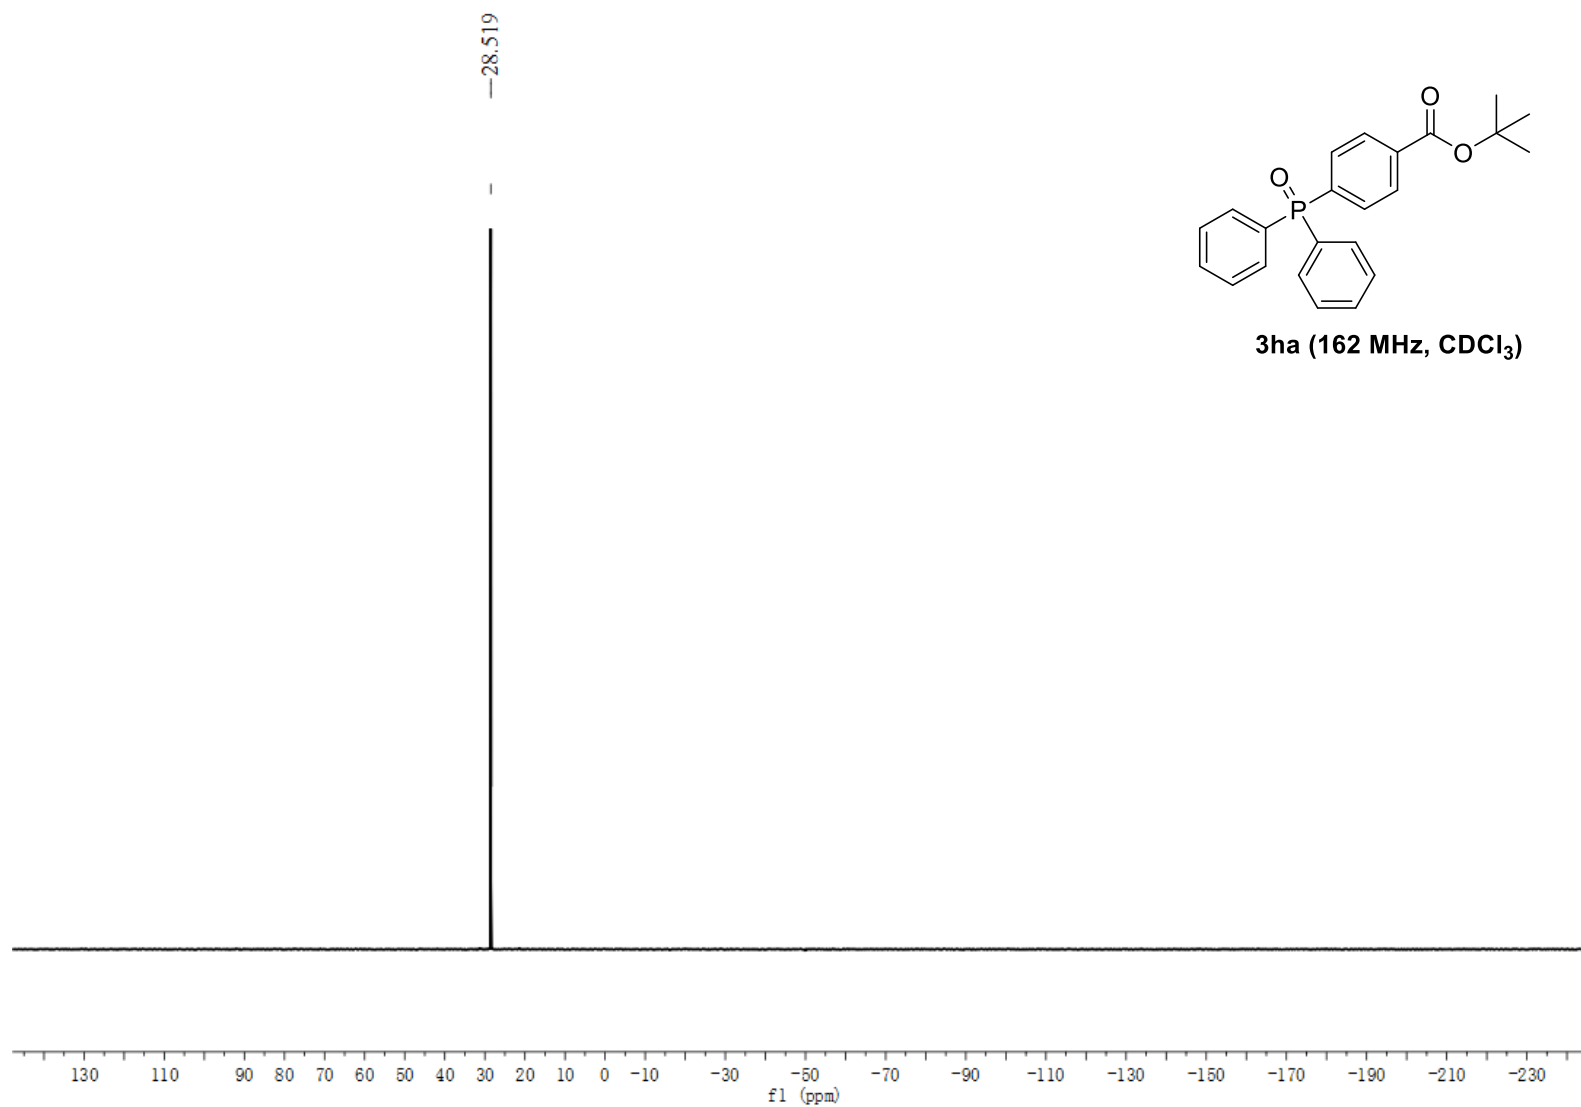

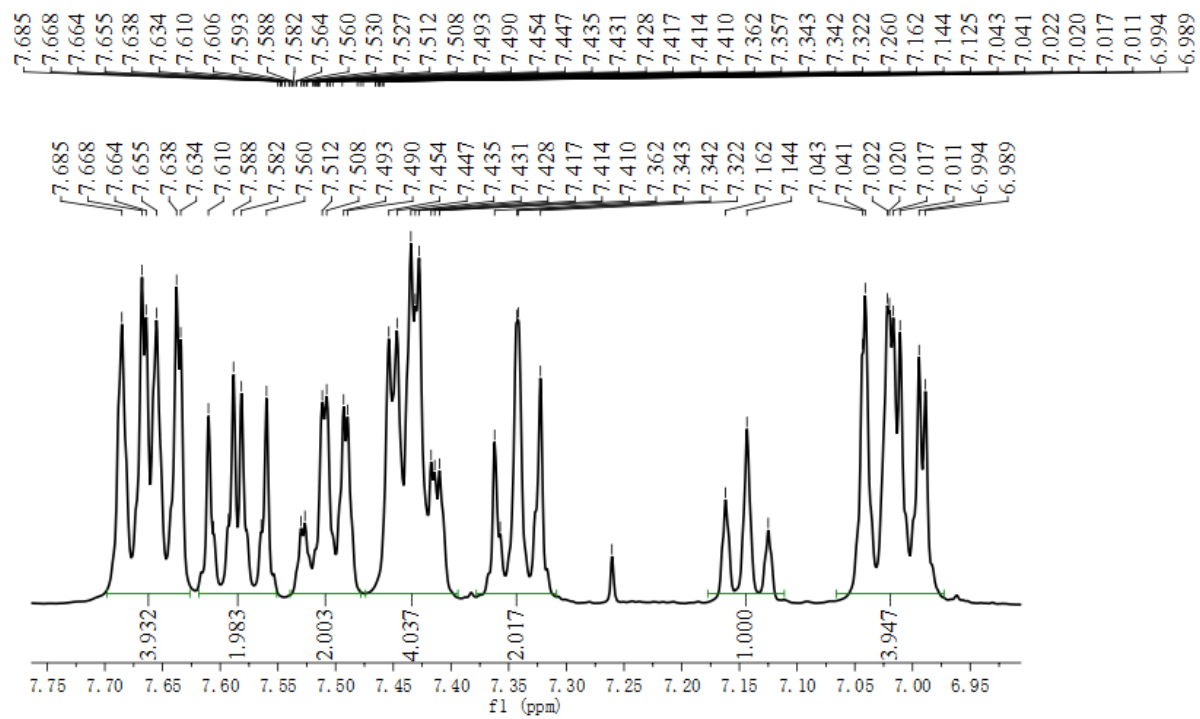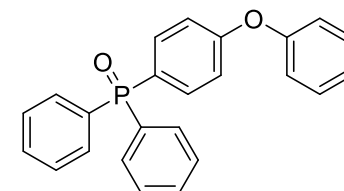

**3ia (400 MHz, CDCl<sub>3</sub>)**

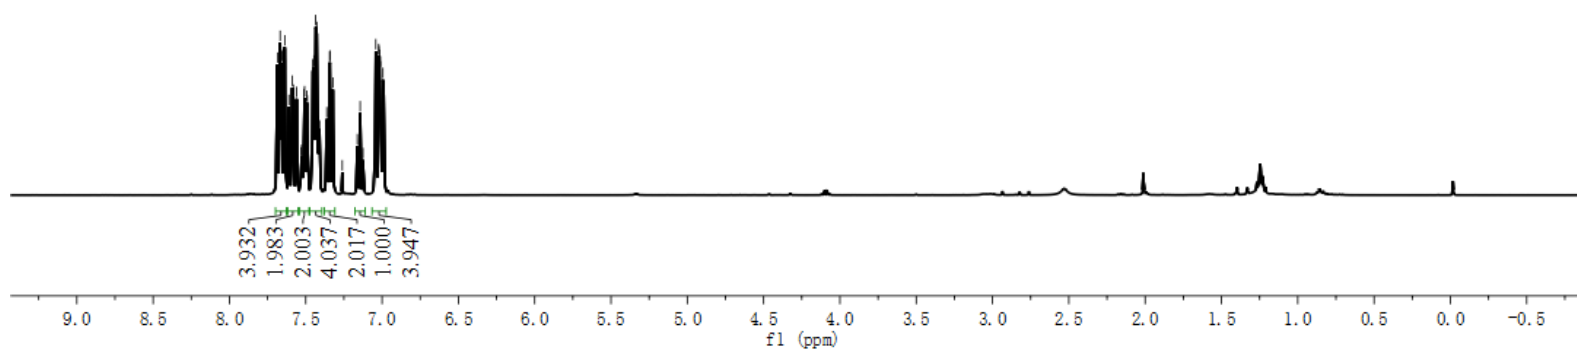

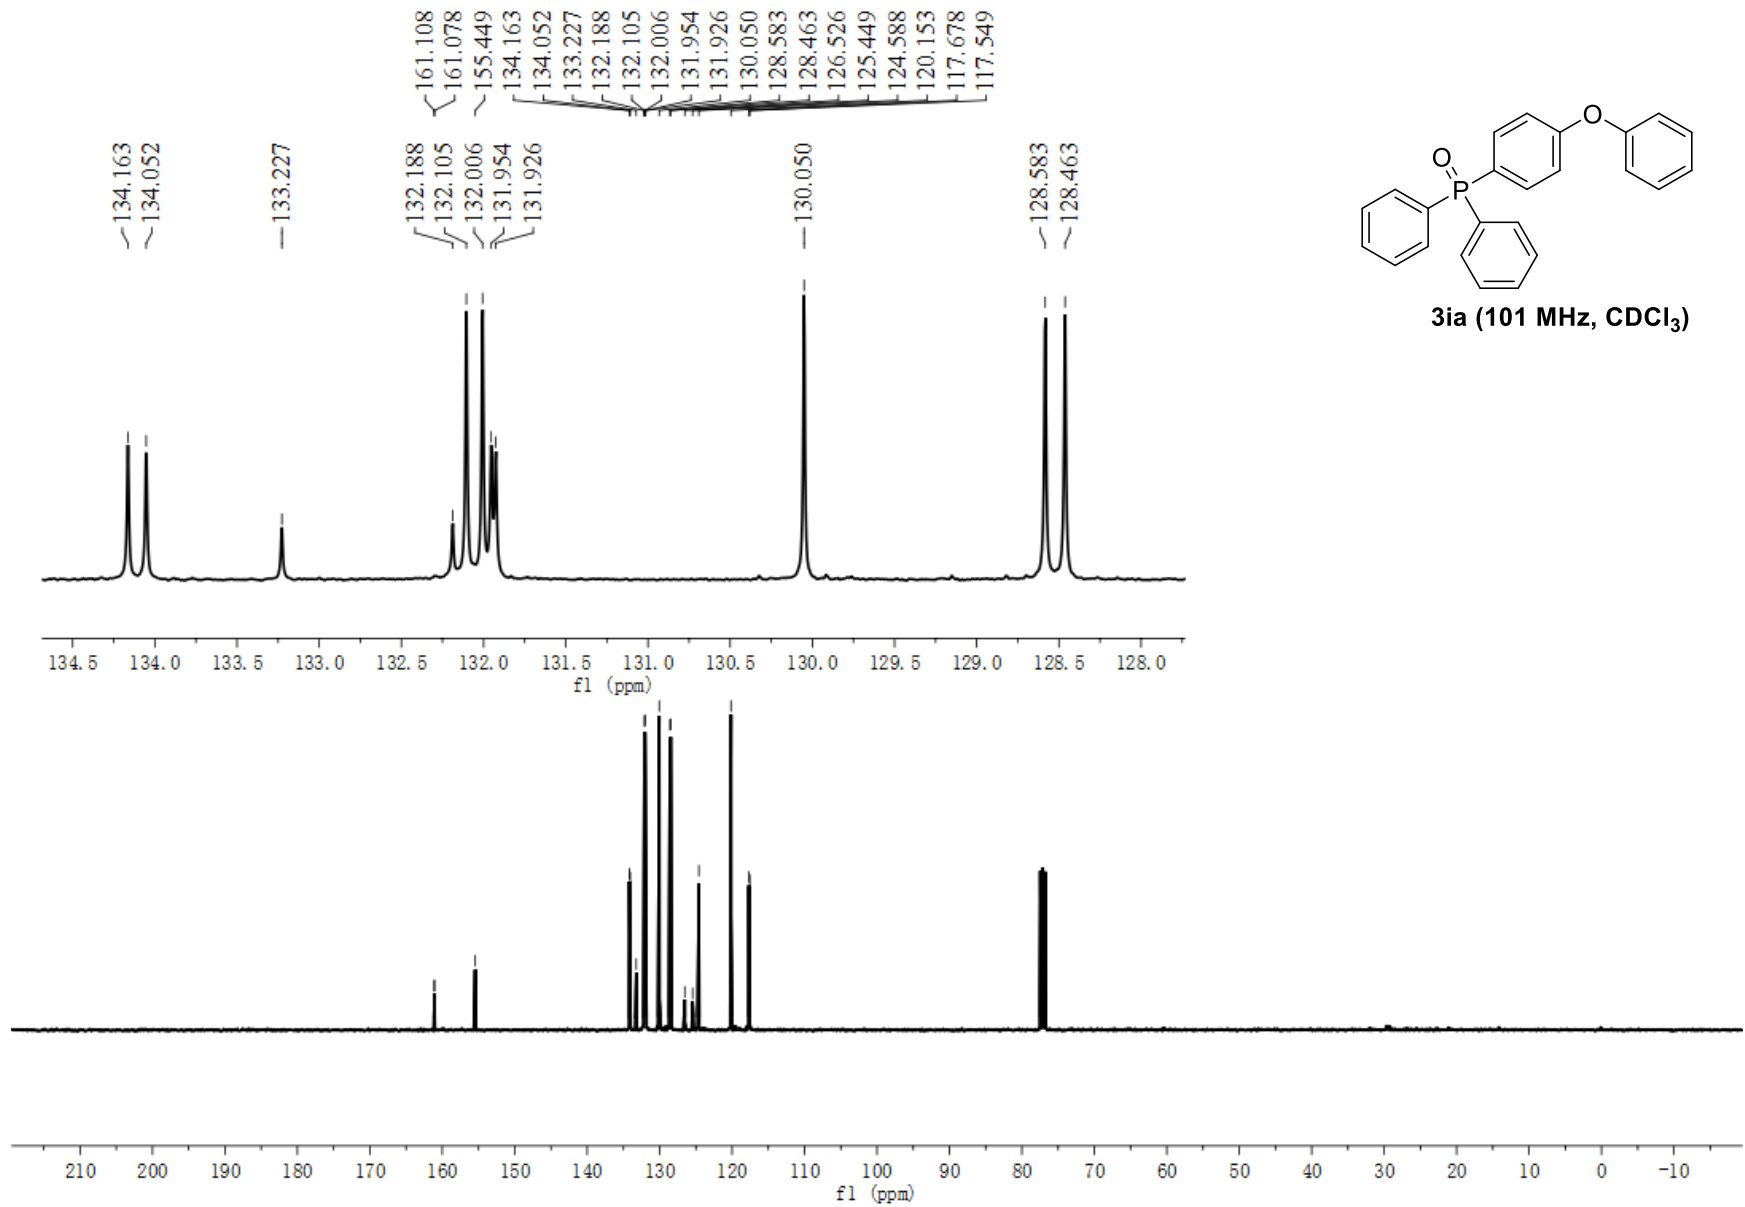

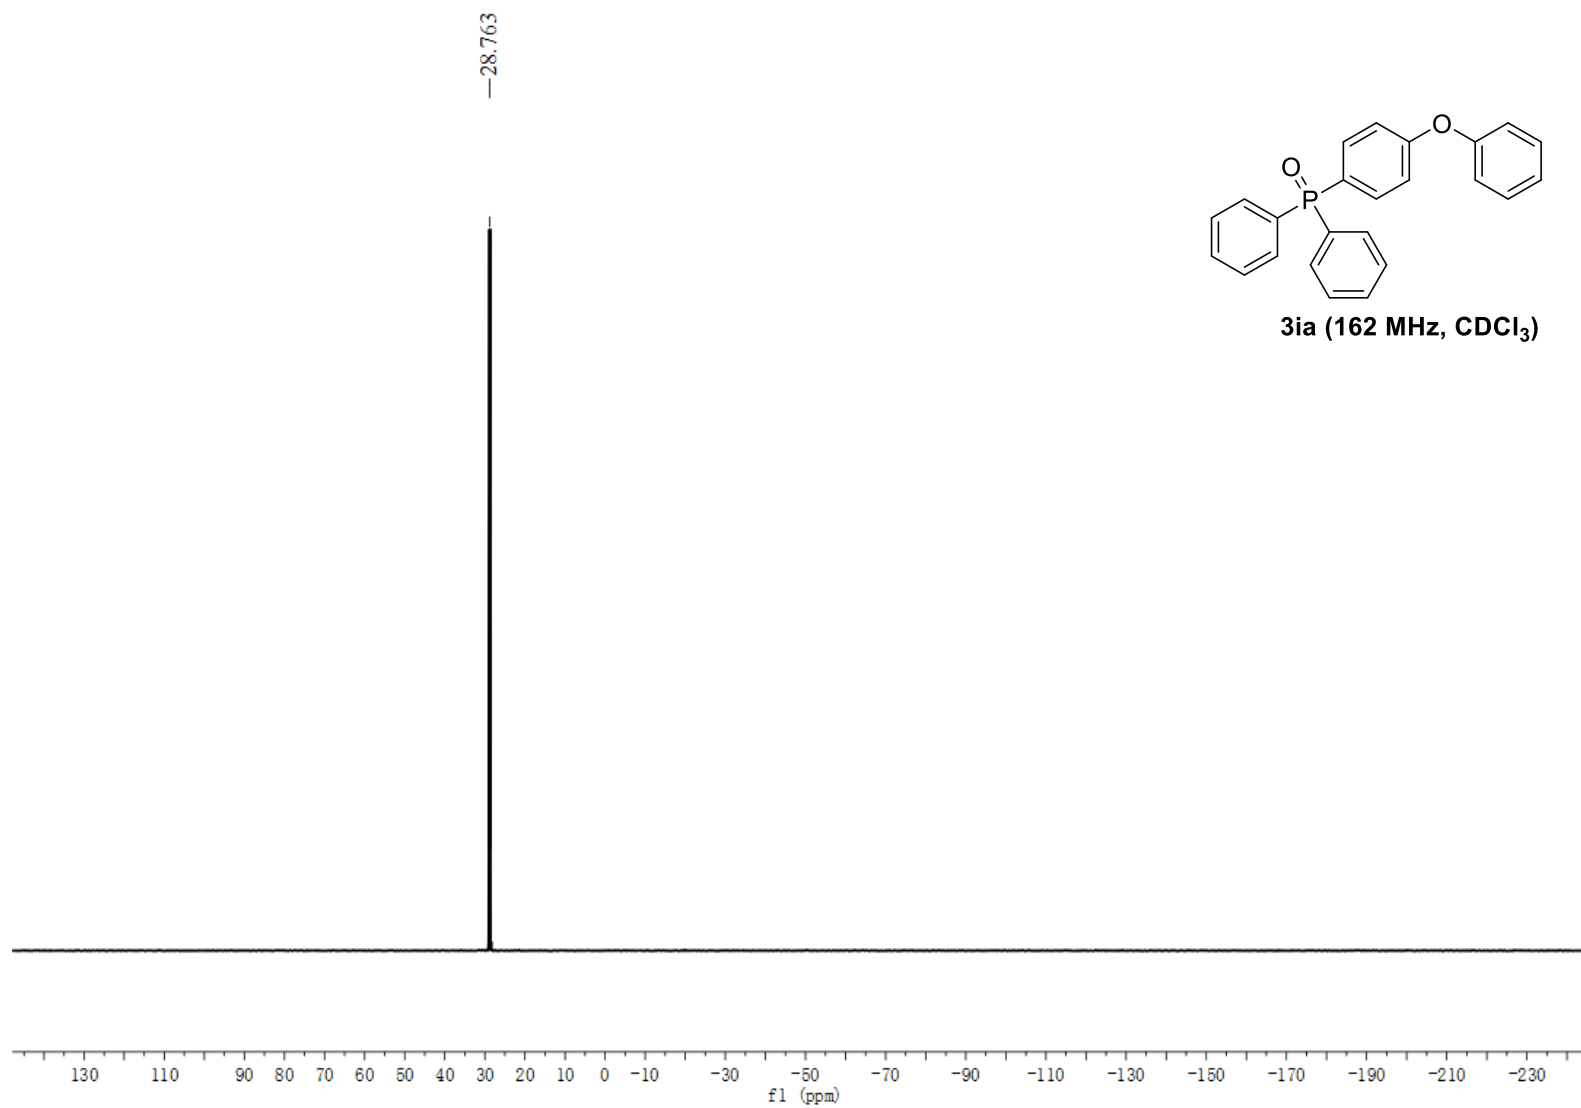

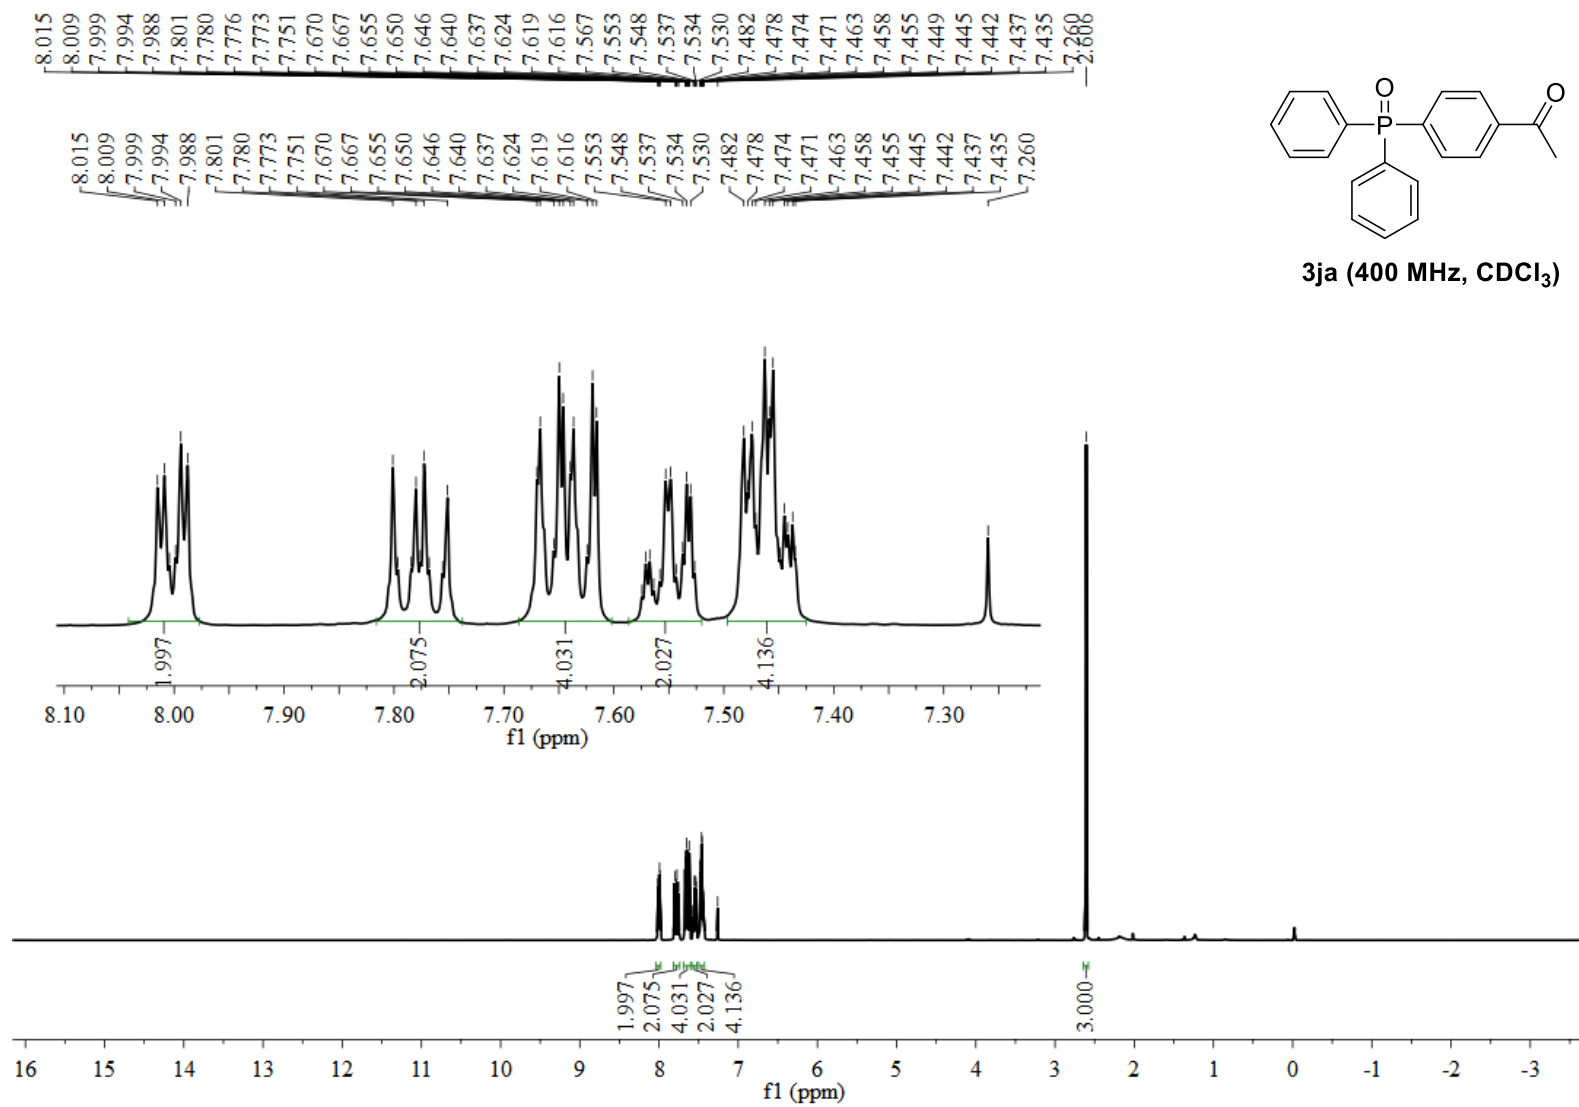

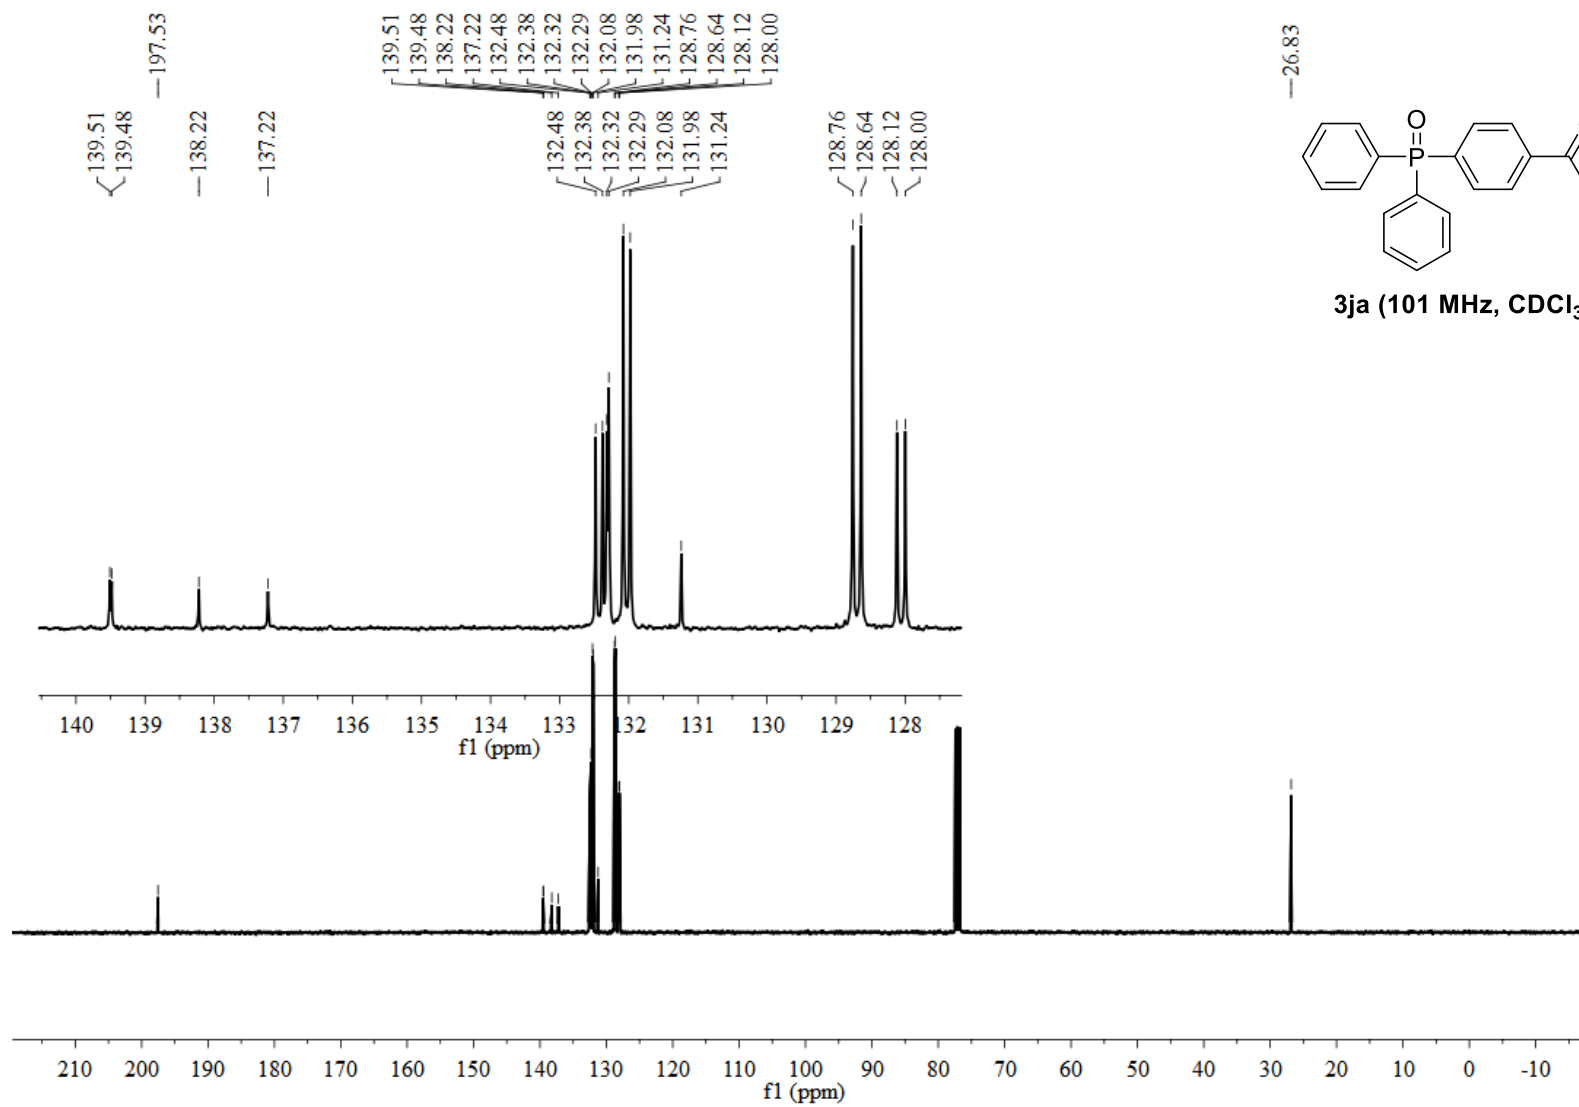

—28.347

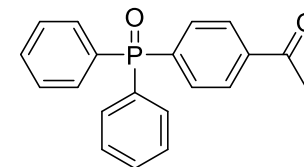

**3ja (162 MHz, CDCl<sub>3</sub>)**

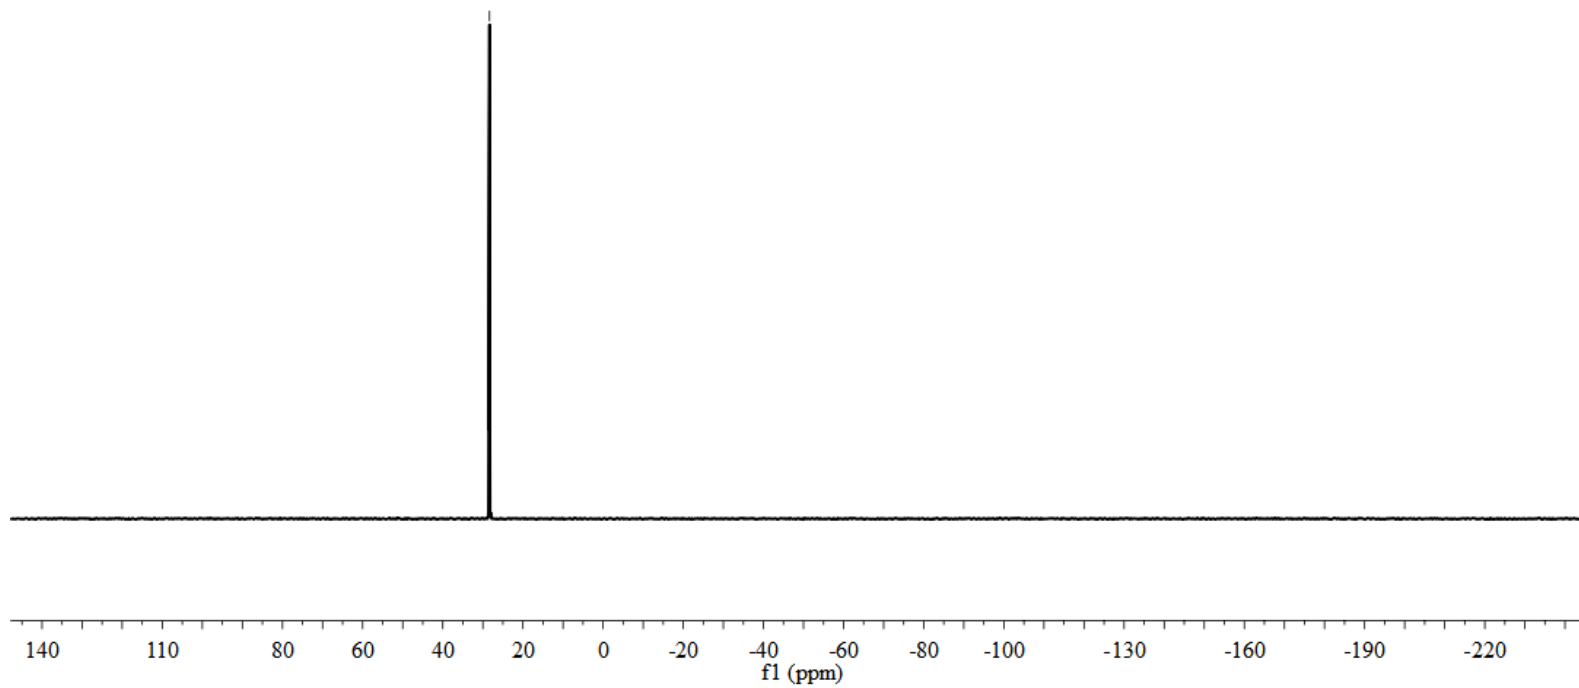



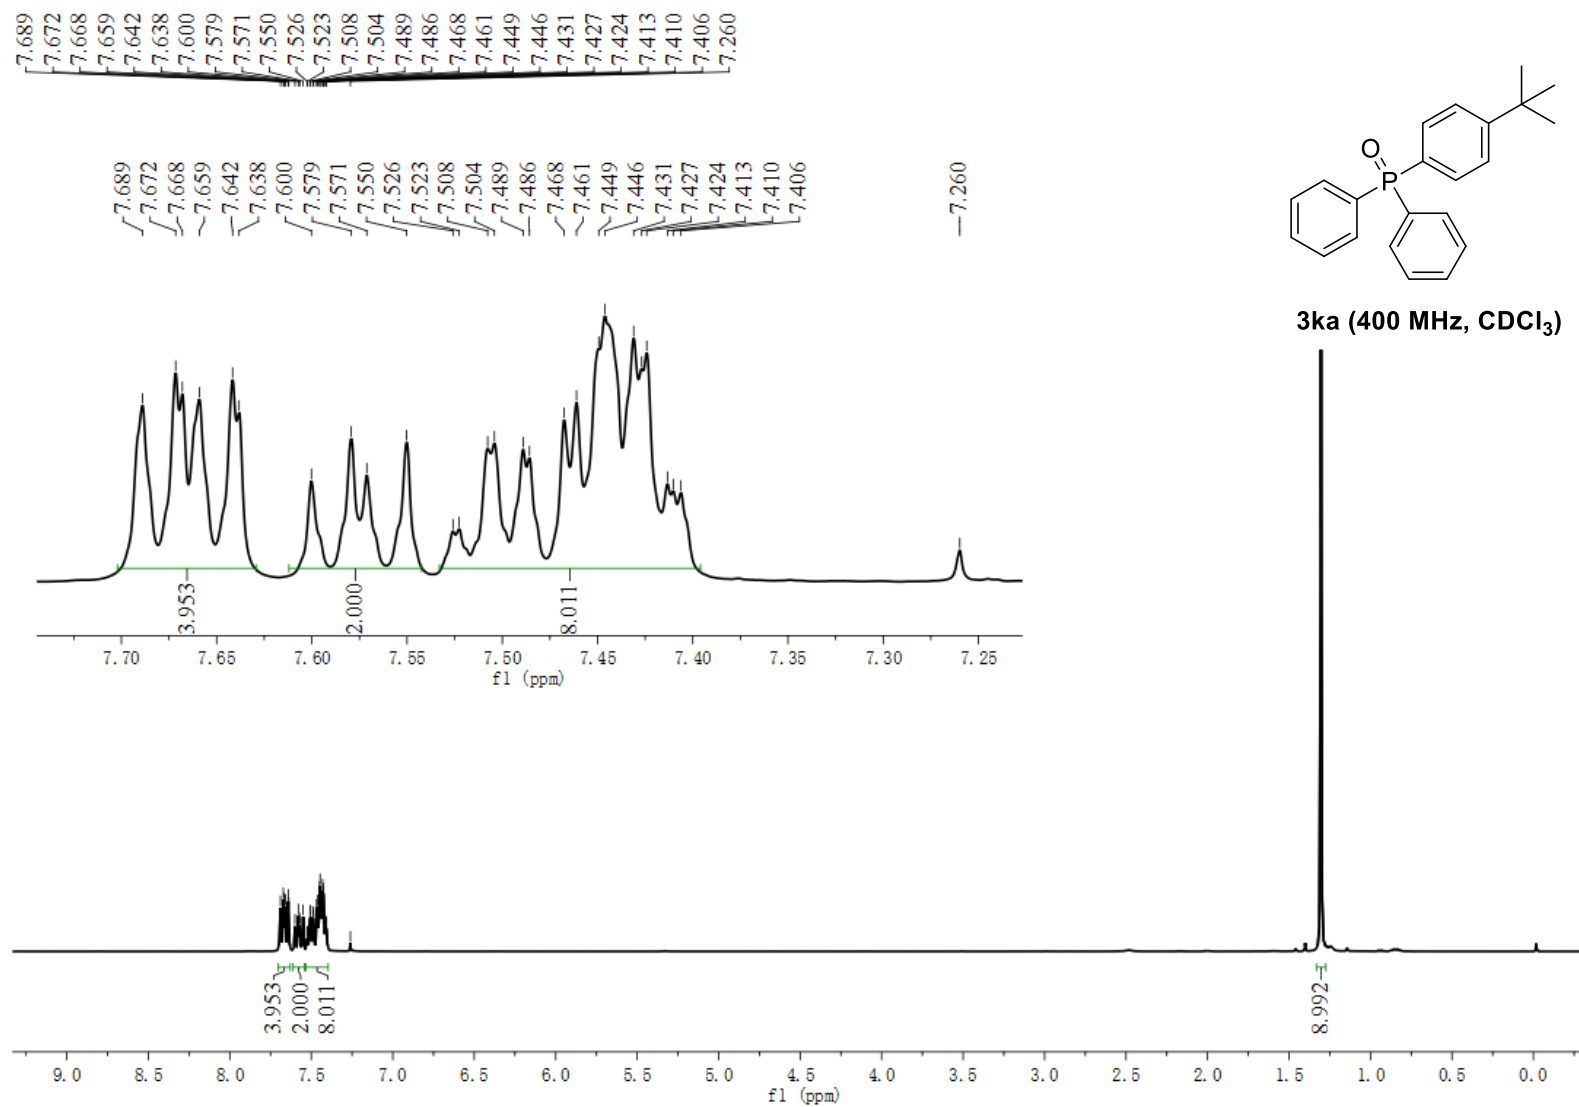

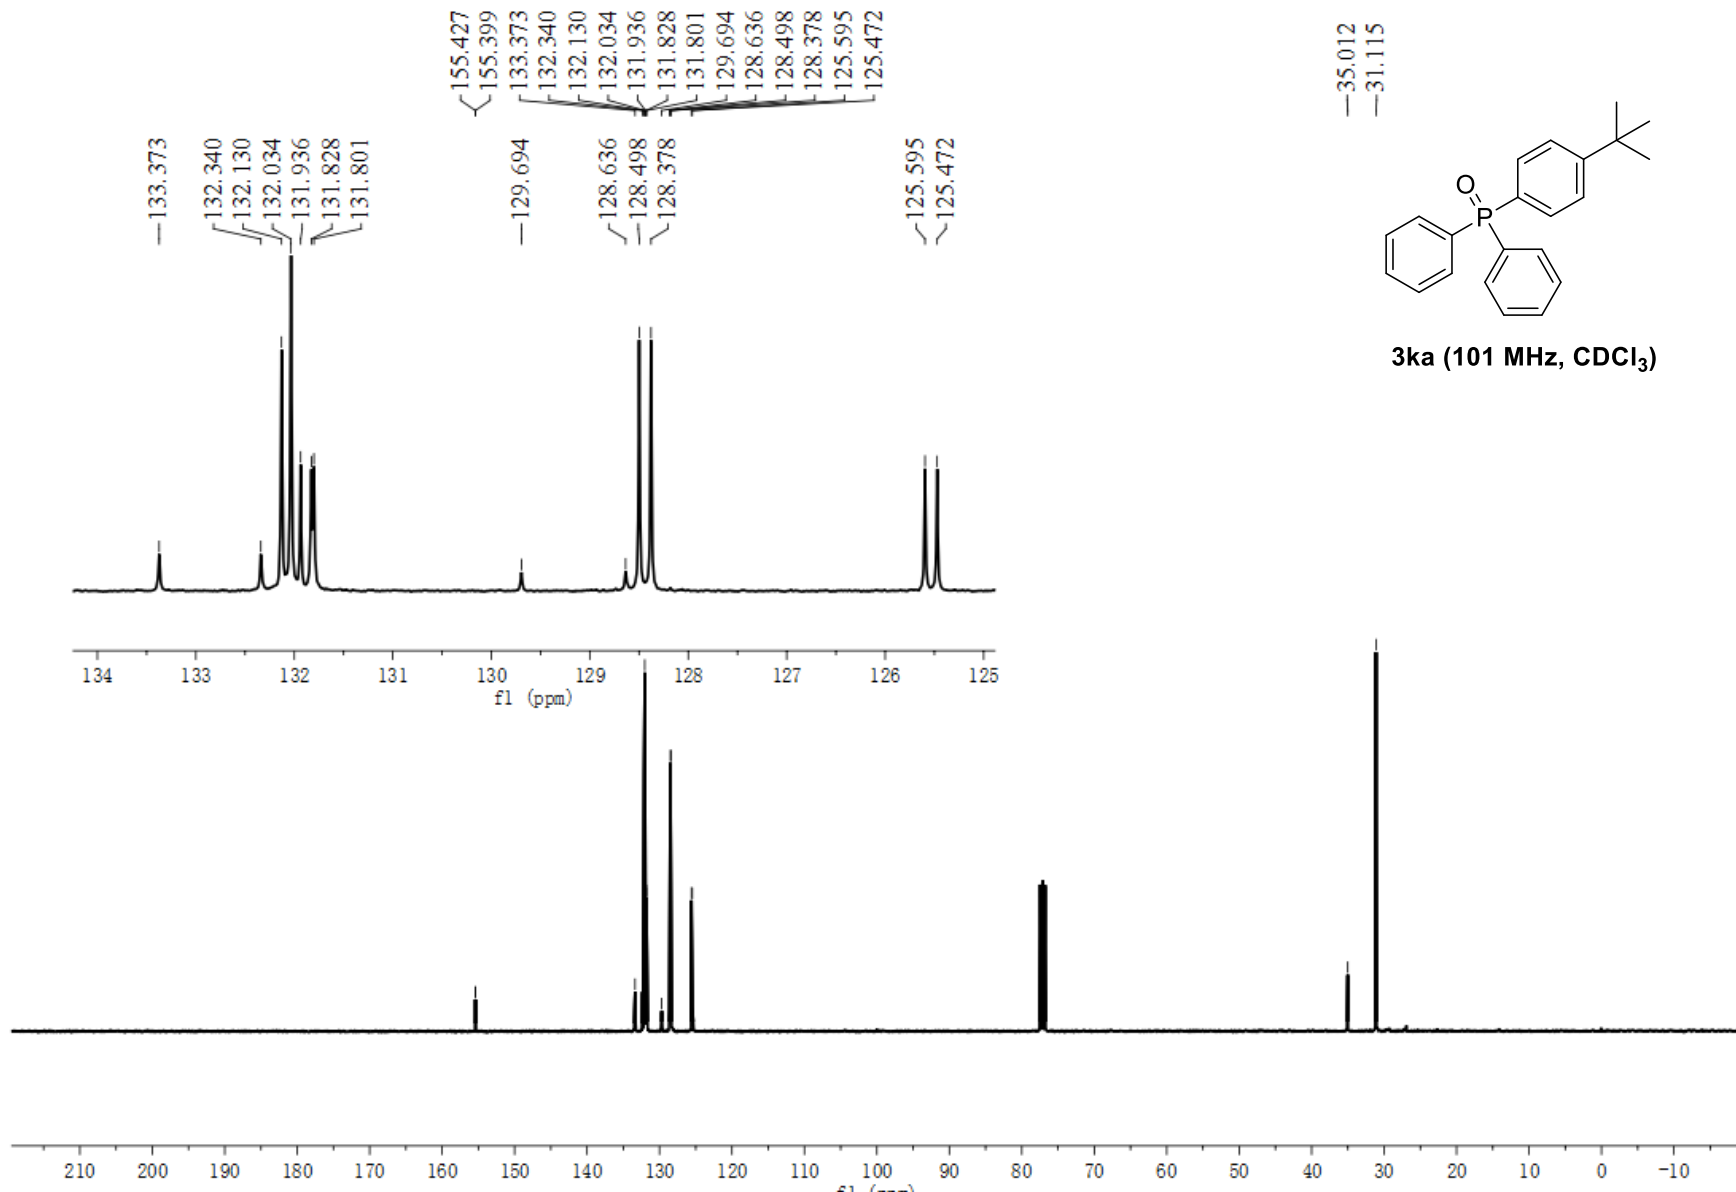

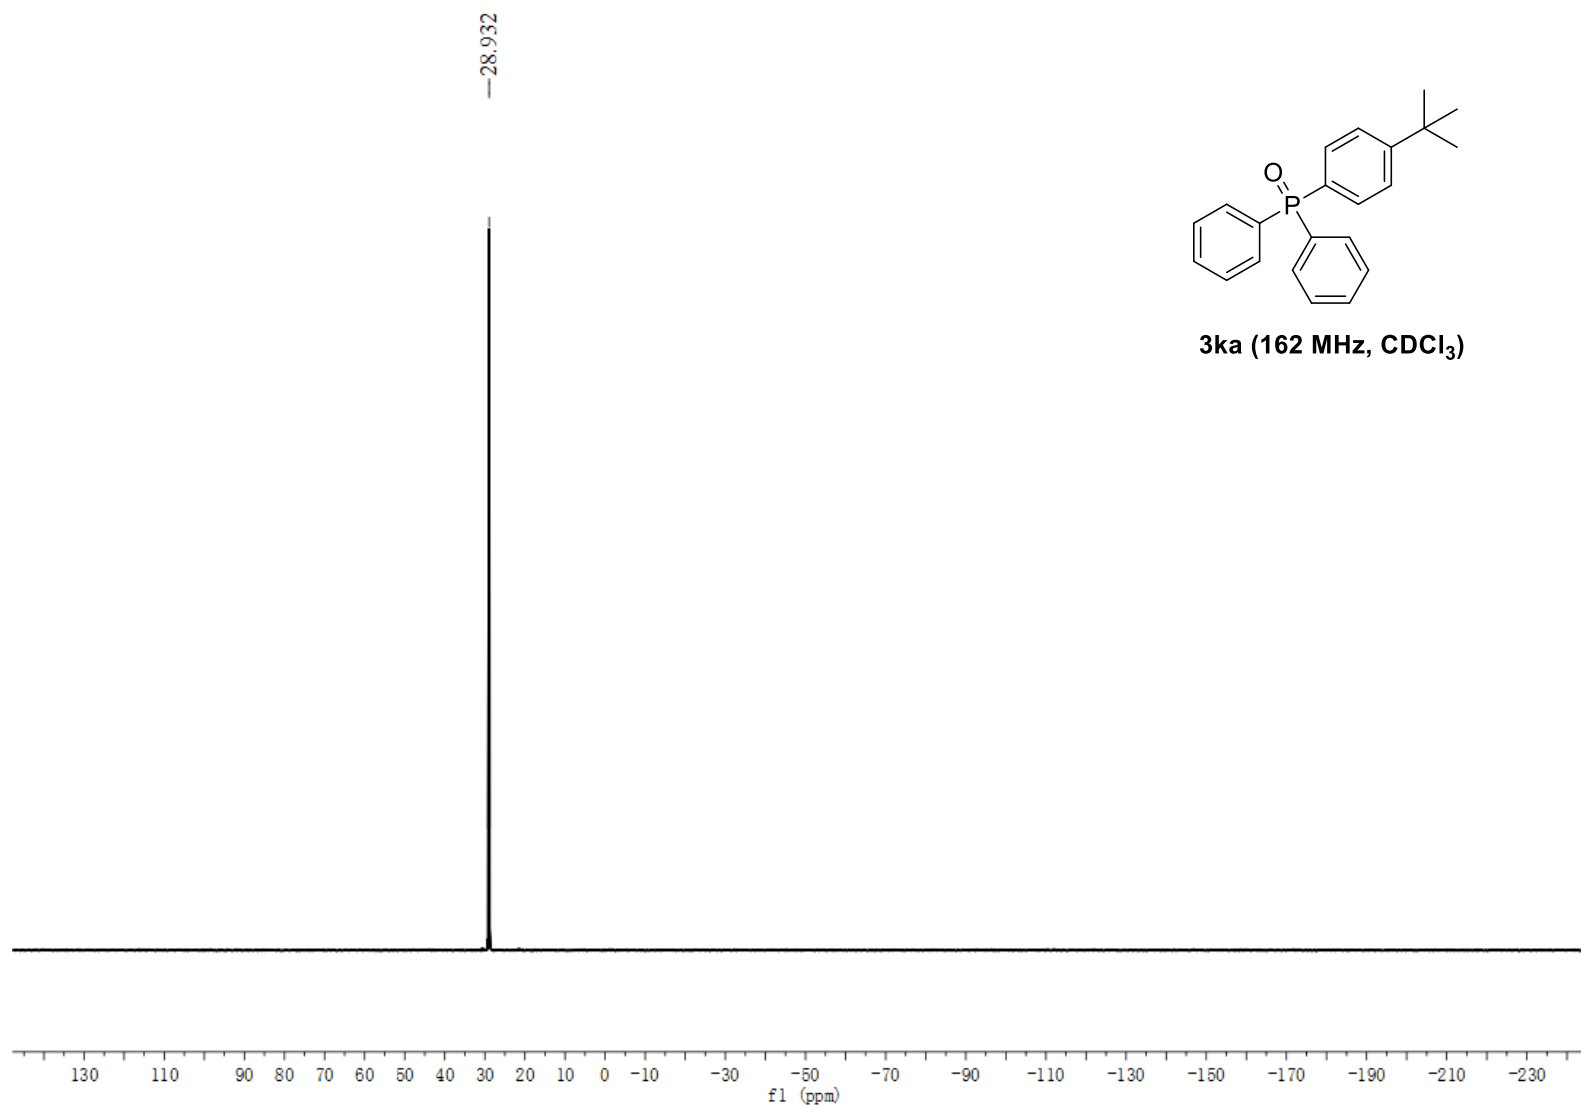

7.688  
7.685  
7.673  
7.668  
7.664  
7.658  
7.655  
7.643  
7.638  
7.634  
7.583  
7.552  
7.548  
7.539  
7.533  
7.529  
7.529  
7.524  
7.518  
7.515  
7.511  
7.507  
7.470  
7.470  
7.467  
7.463  
7.463  
7.460  
7.460  
7.454  
7.451  
7.451  
7.447  
7.447  
7.444  
7.438  
7.434  
7.431  
7.431  
7.426  
7.424  
7.424  
7.347  
7.336  
7.330  
7.323  
7.323  
2.355

7.688  
7.685  
7.673  
7.668  
7.664  
7.658  
7.655  
7.643  
7.638  
7.634  
7.583  
7.552  
7.548  
7.533  
7.529  
7.529  
7.524  
7.518  
7.515  
7.511  
7.507  
7.470  
7.470  
7.467  
7.463  
7.463  
7.460  
7.460  
7.454  
7.451  
7.451  
7.447  
7.444  
7.438  
7.434  
7.431  
7.431  
7.426  
7.424  
7.424  
7.347  
7.336  
7.330  
7.323  
7.260

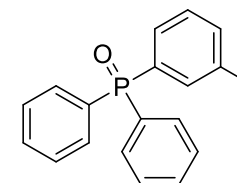

3la (400 MHz, CDCl<sub>3</sub>)

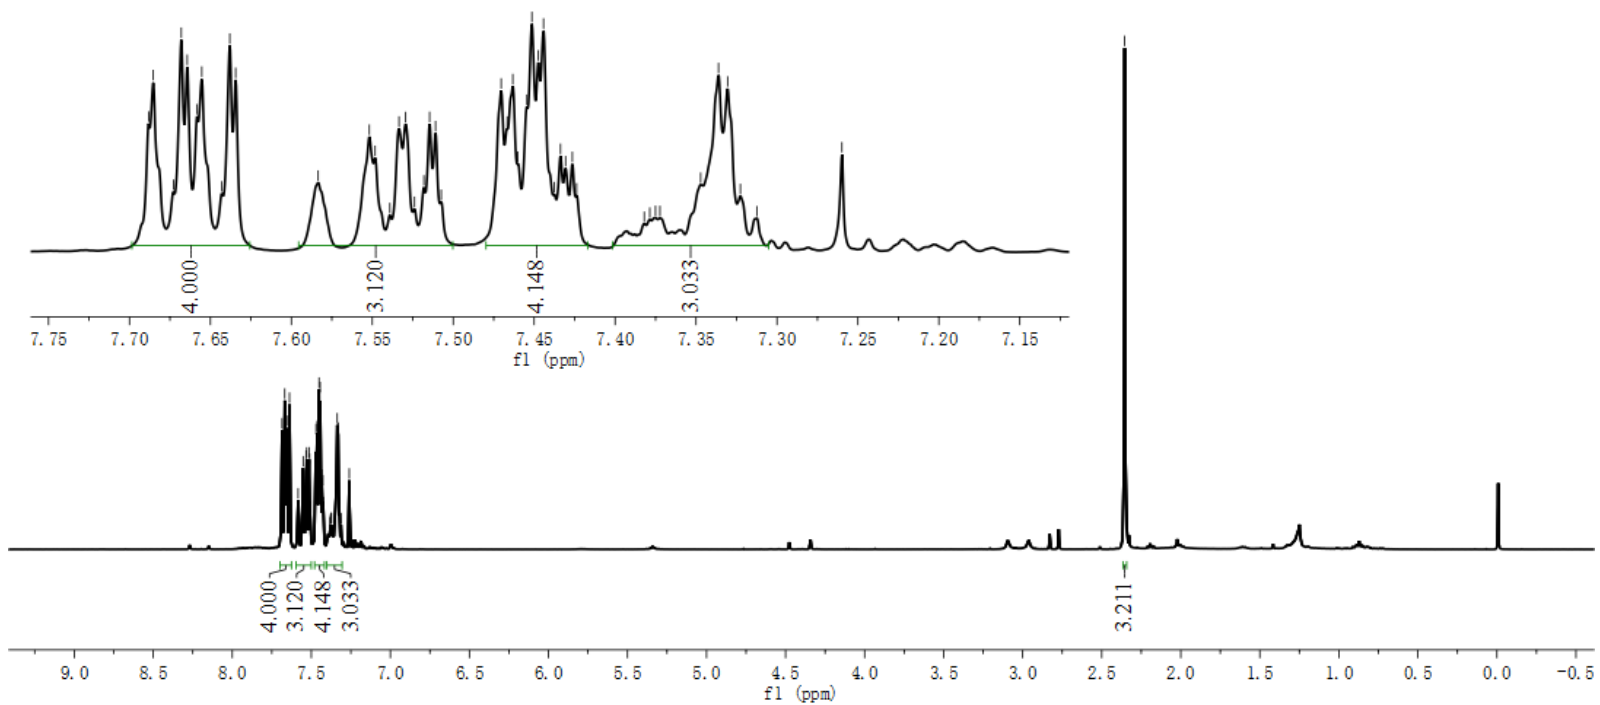

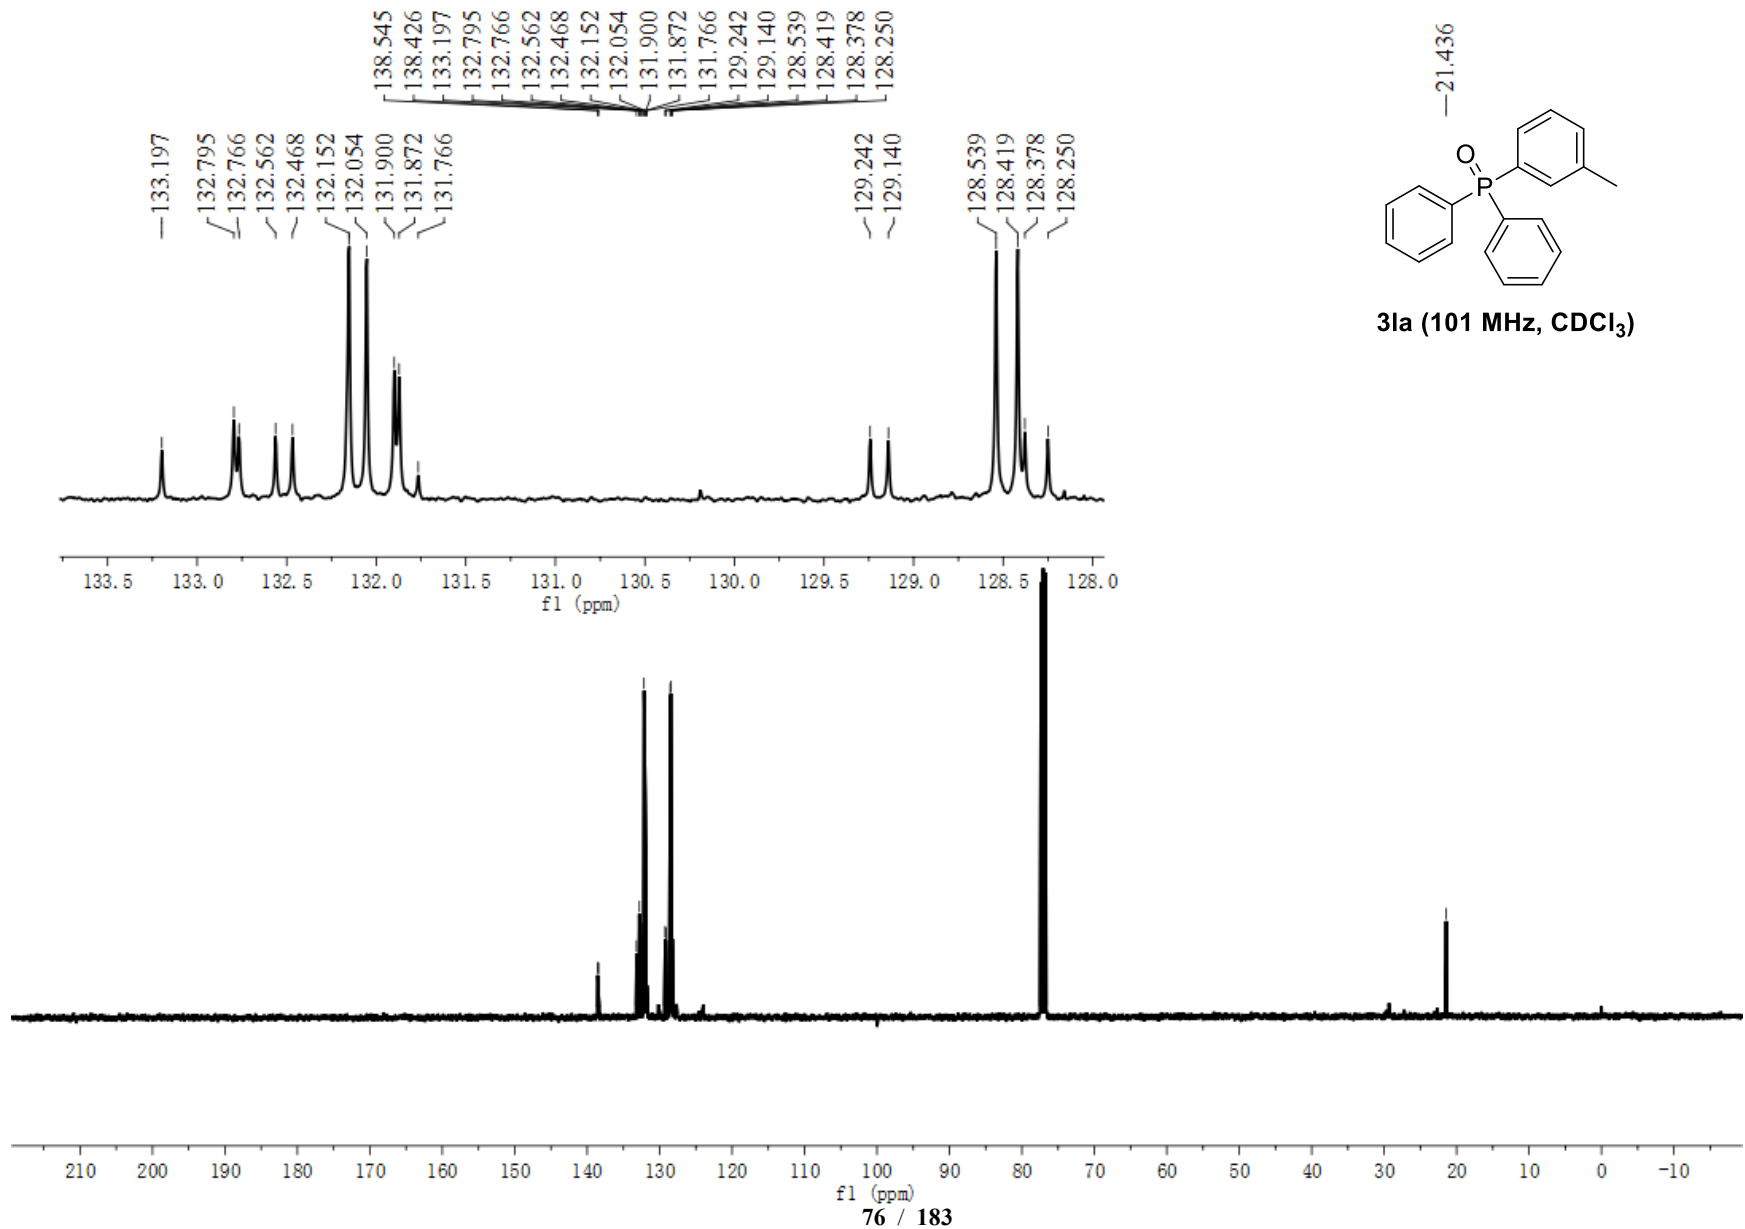

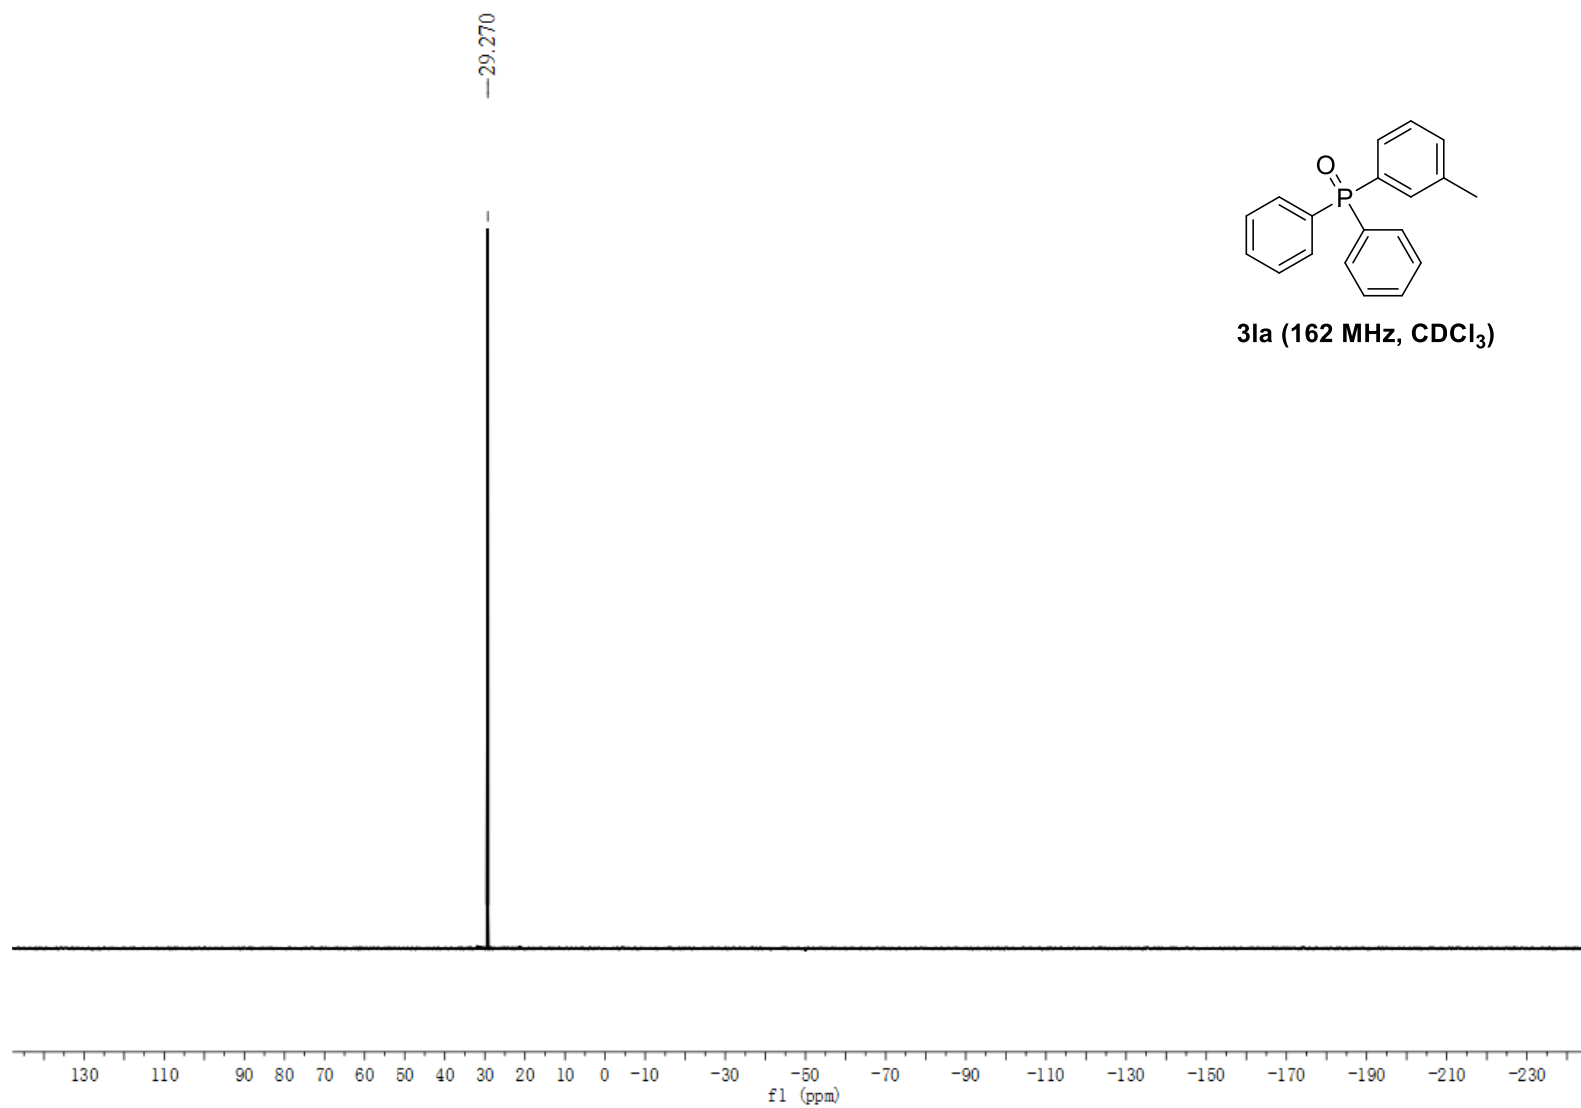

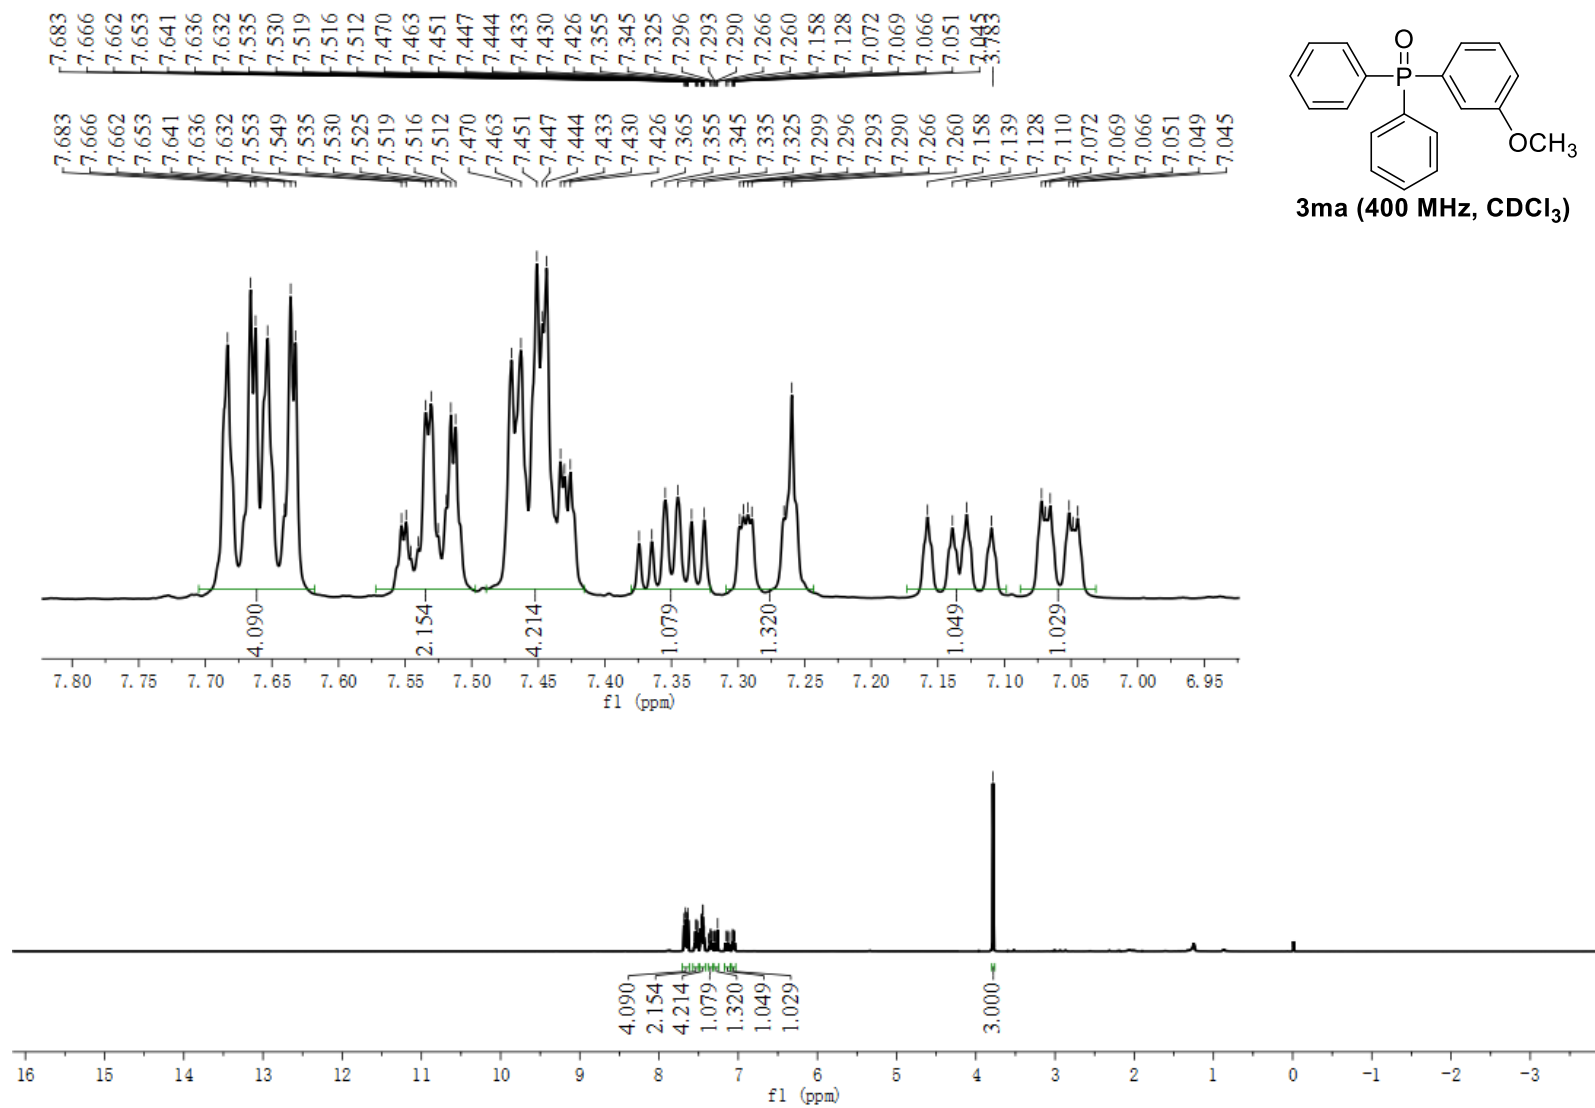

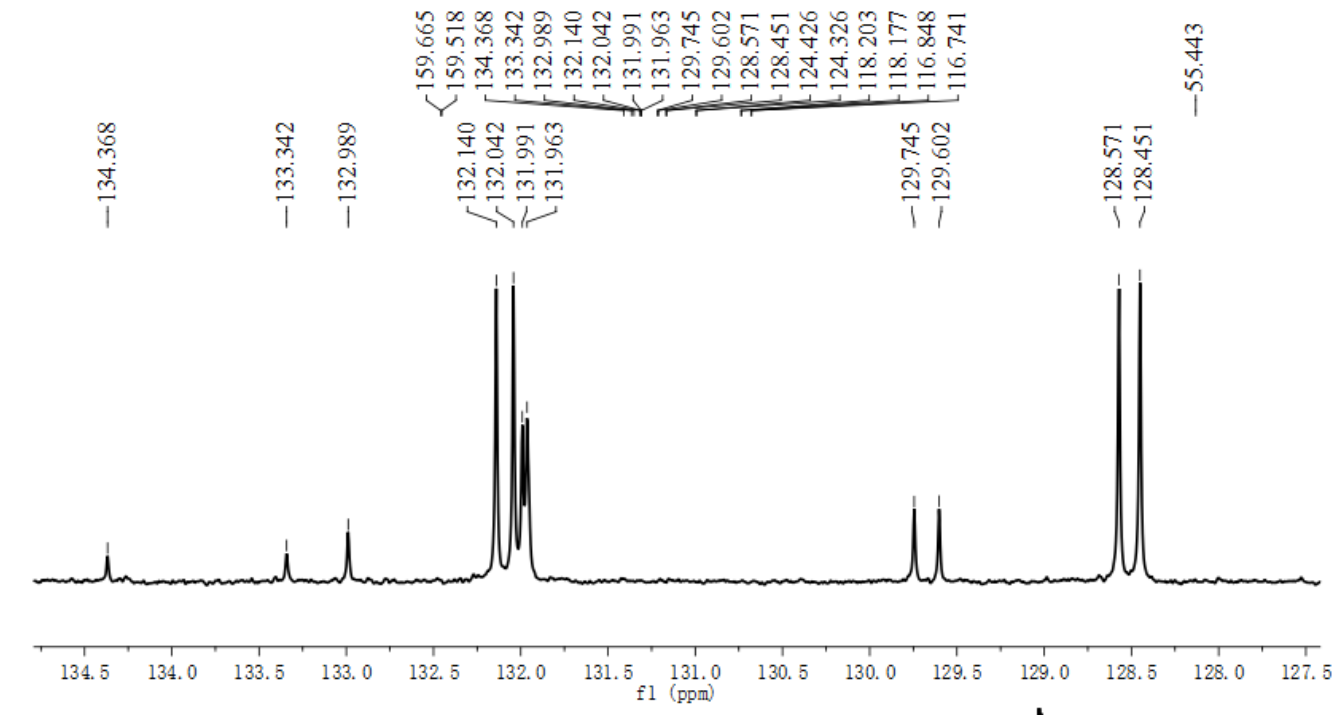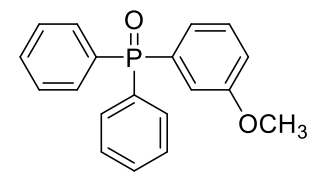

**3ma (101 MHz, CDCl<sub>3</sub>)**

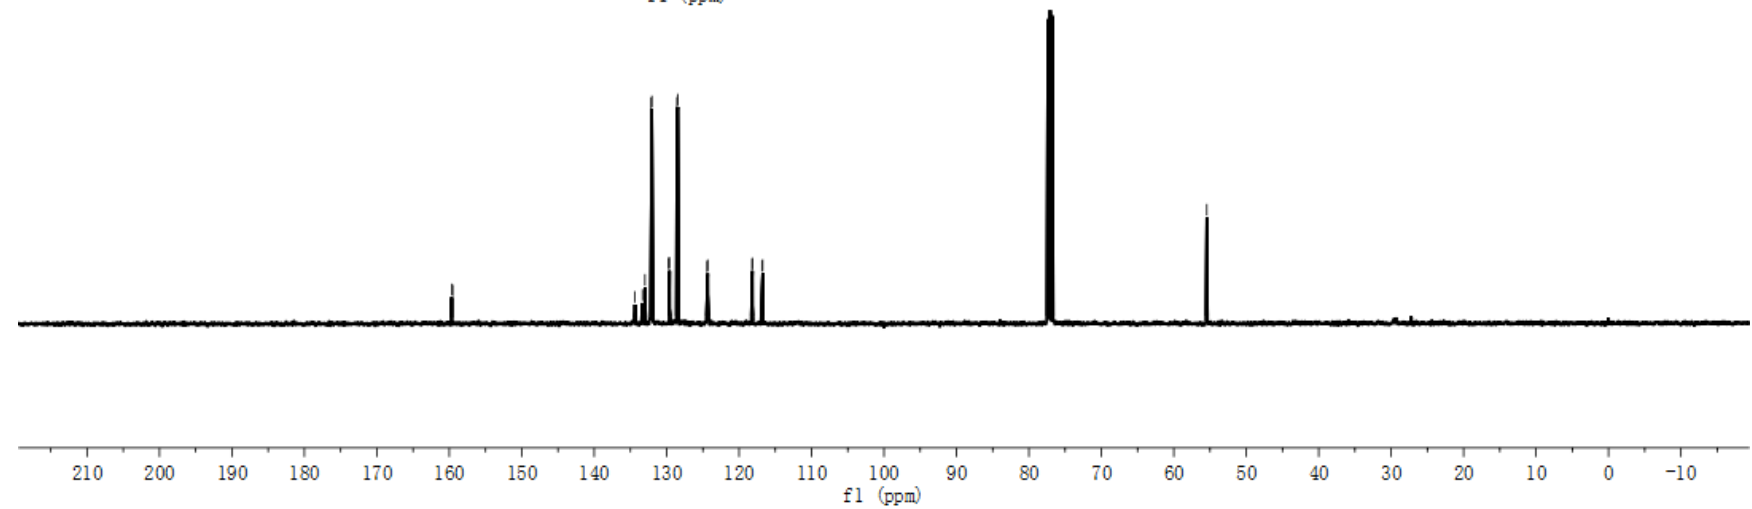



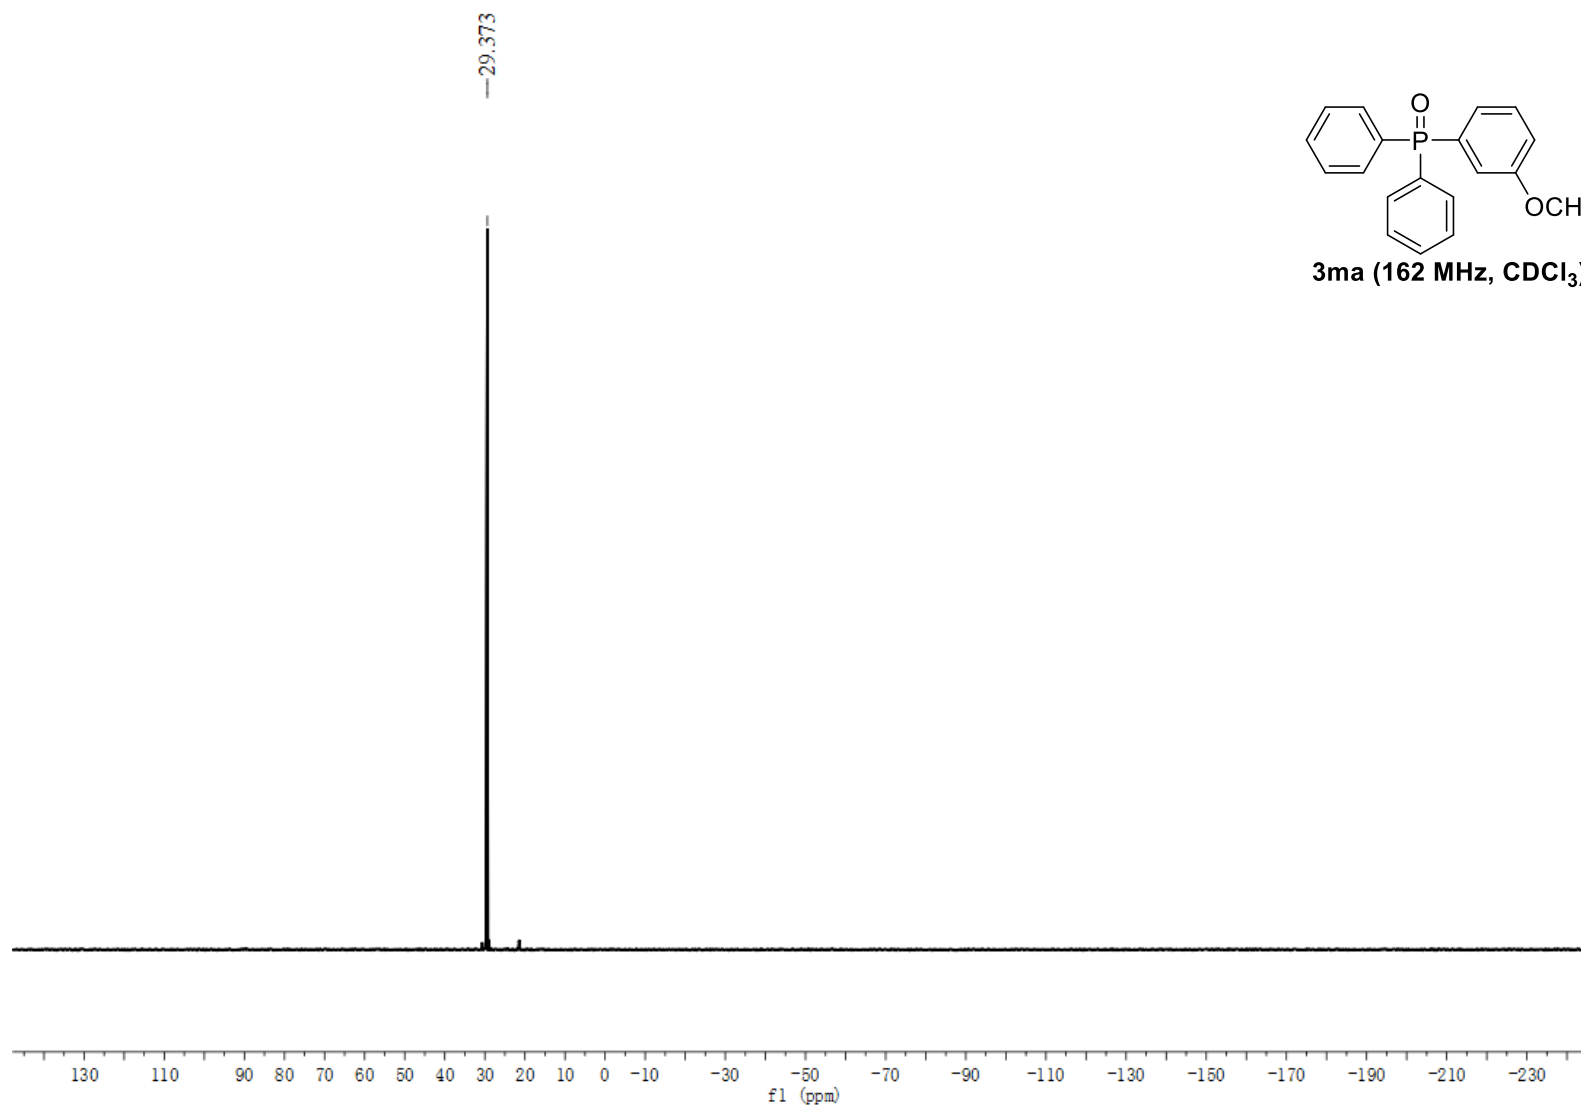

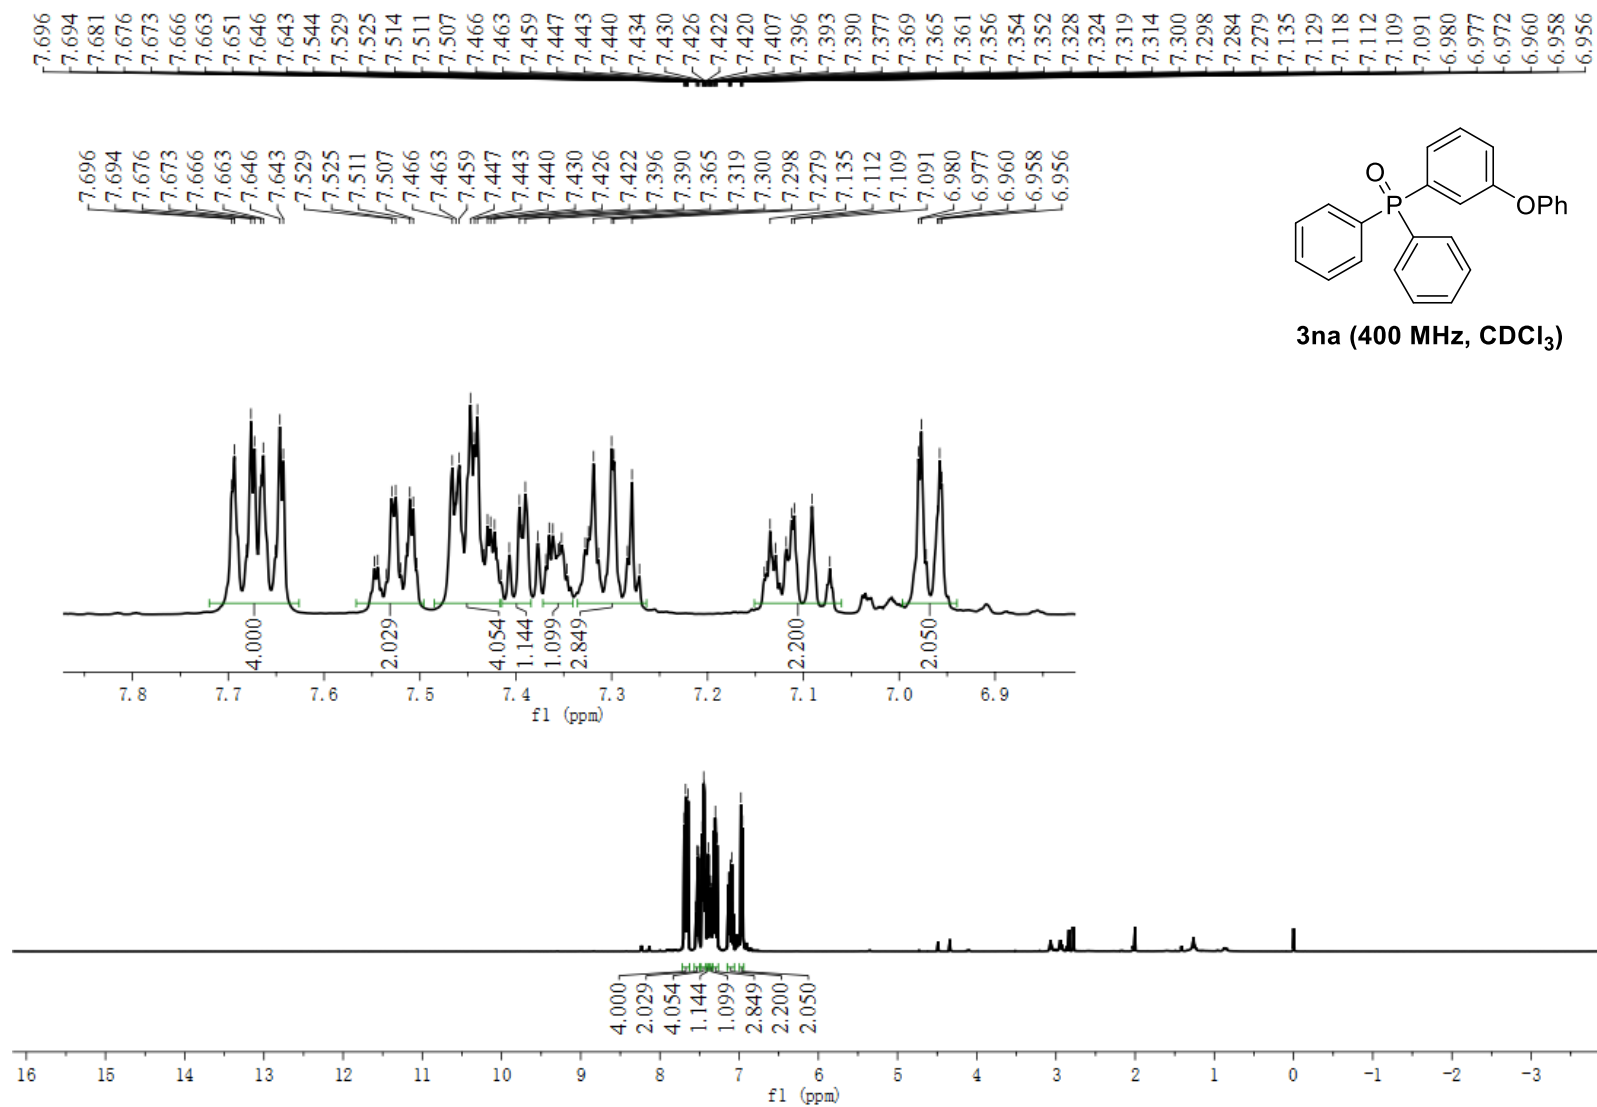

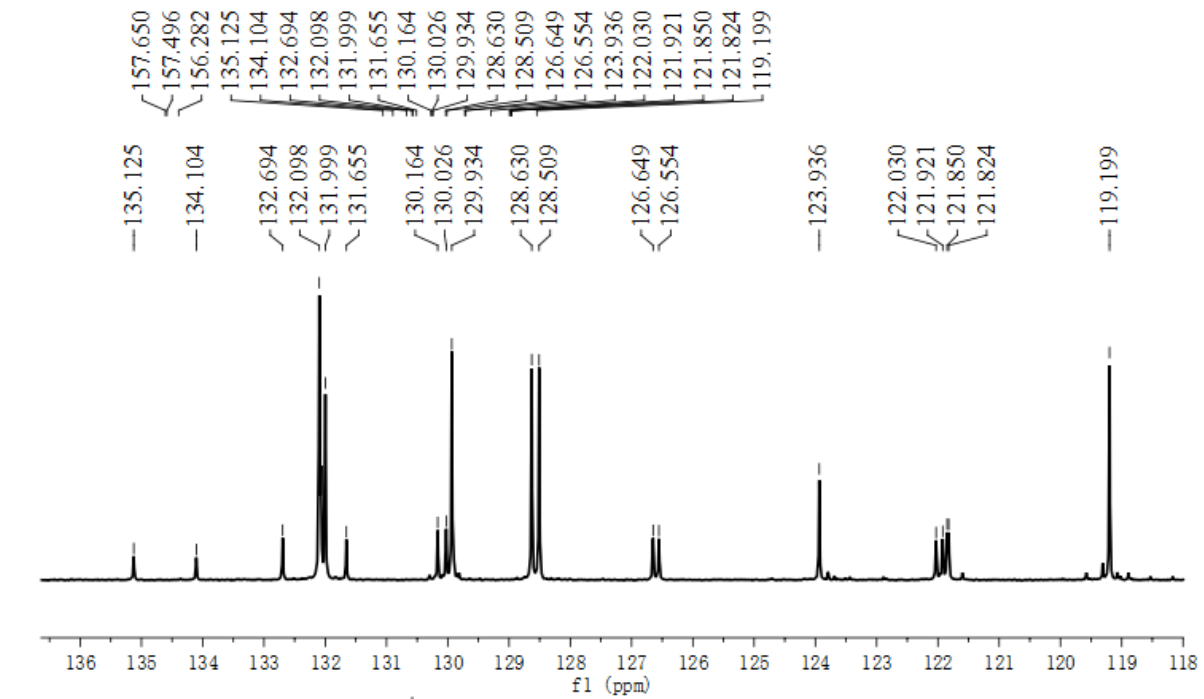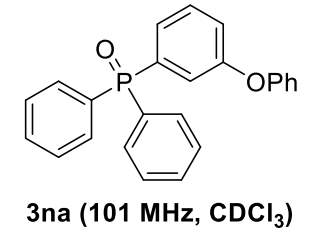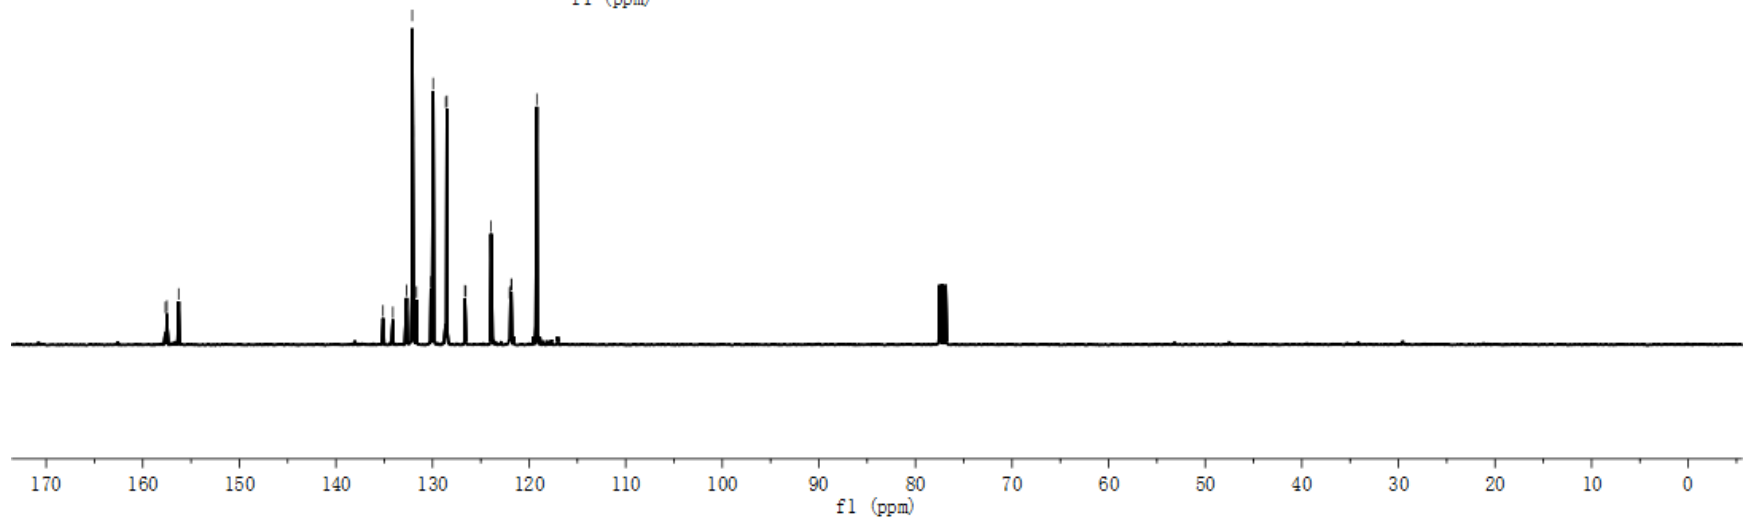

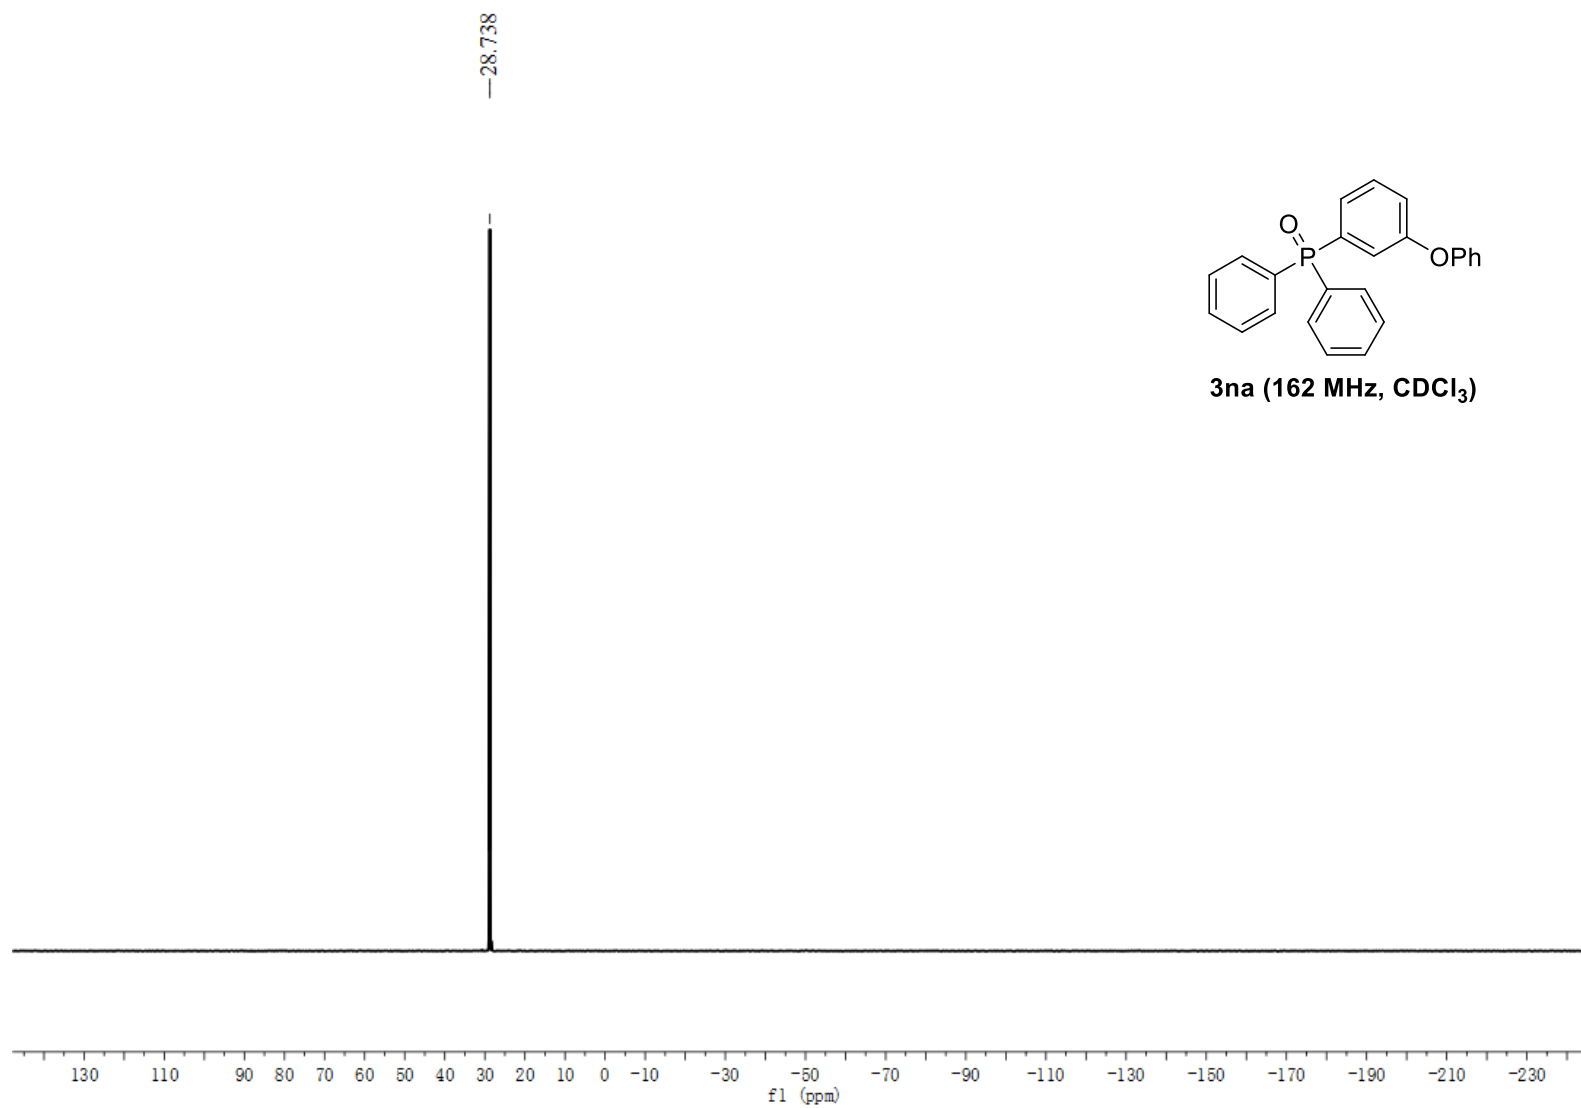

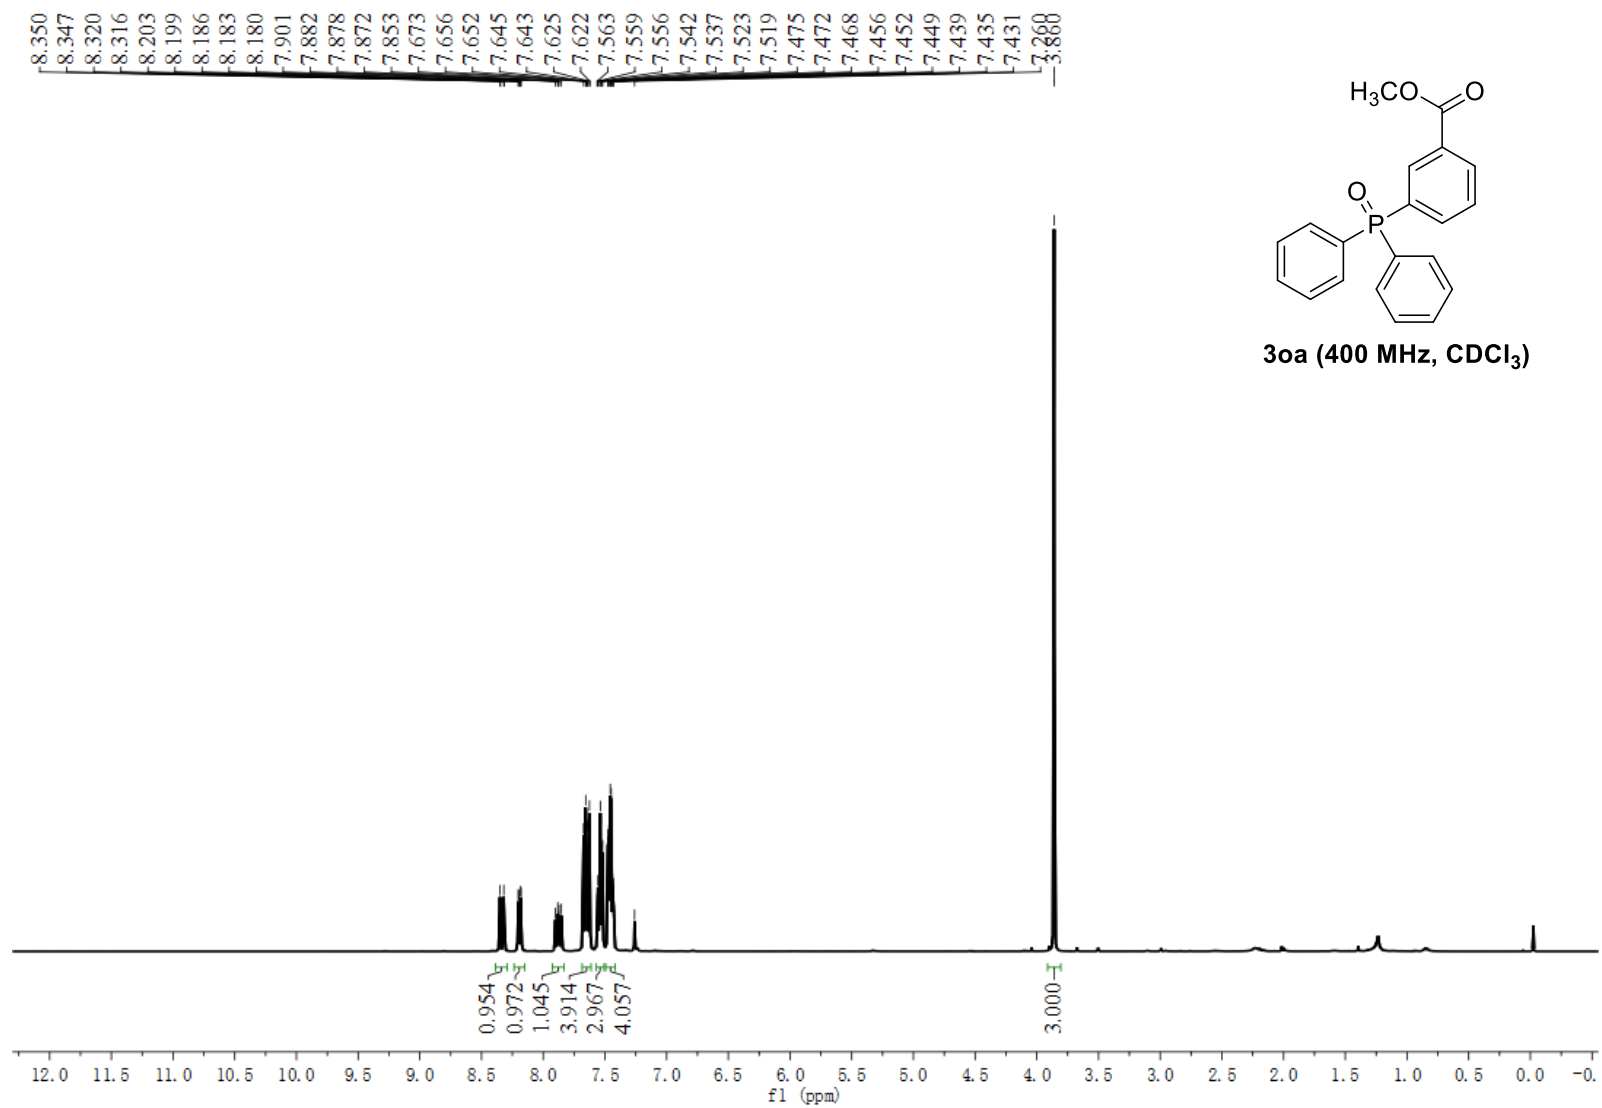

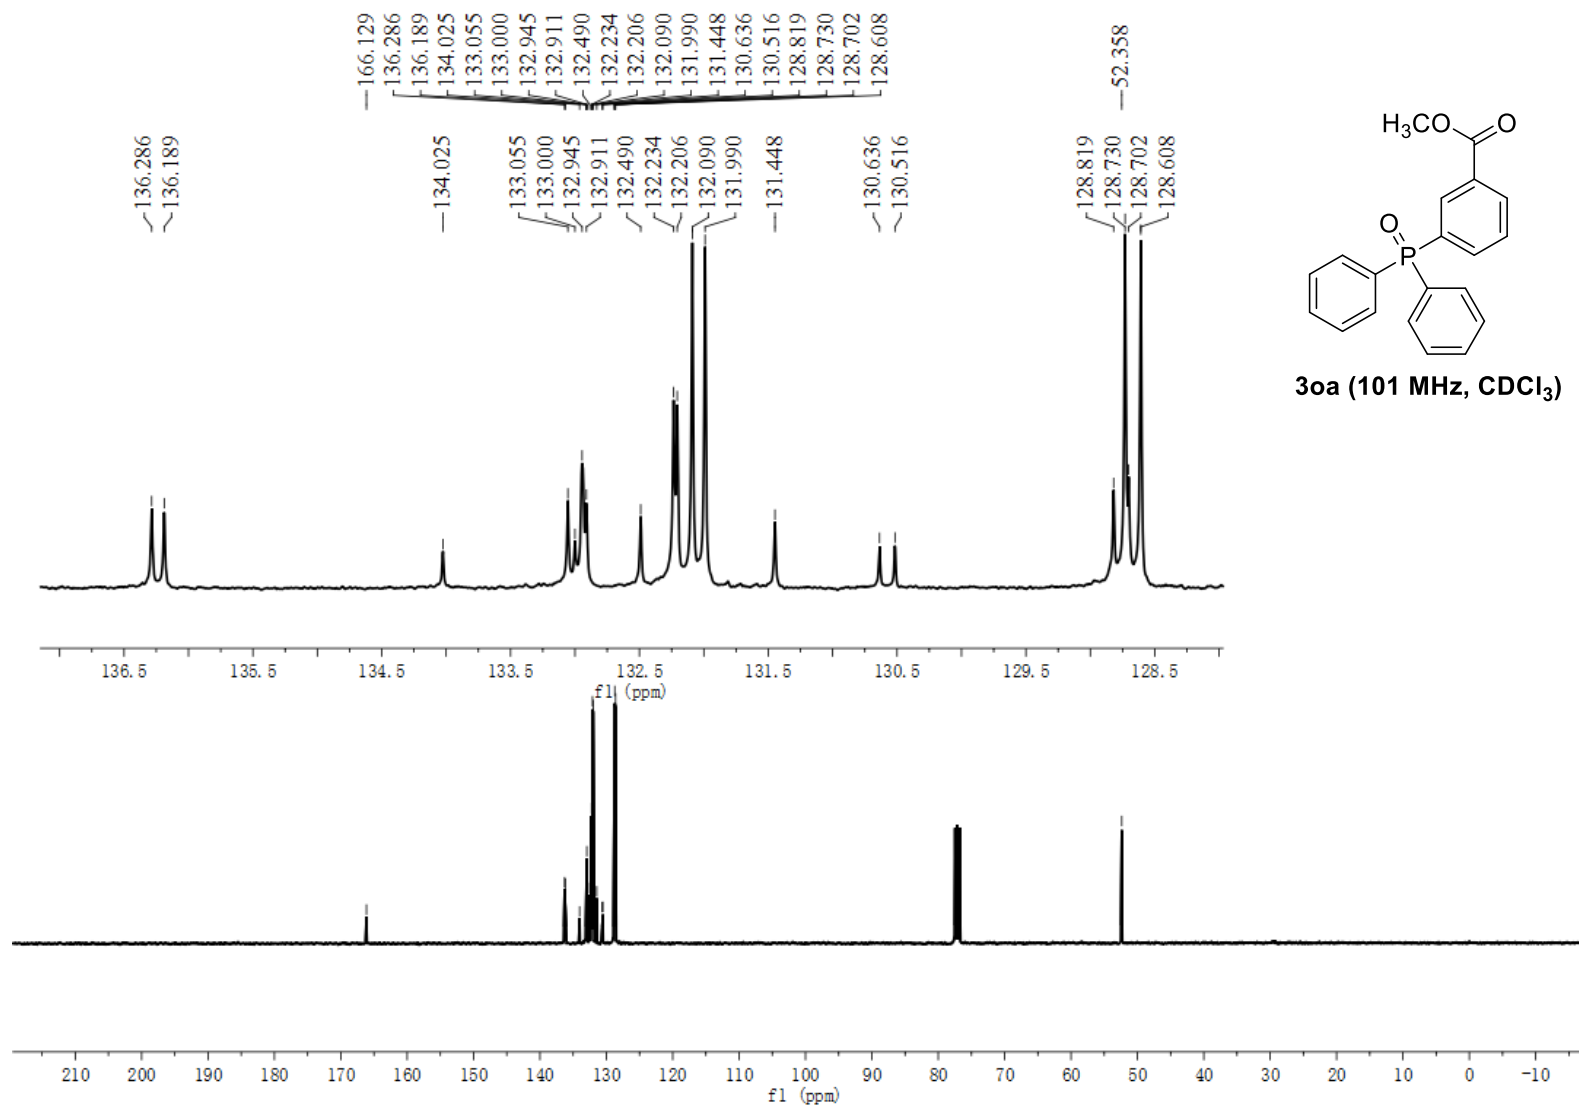

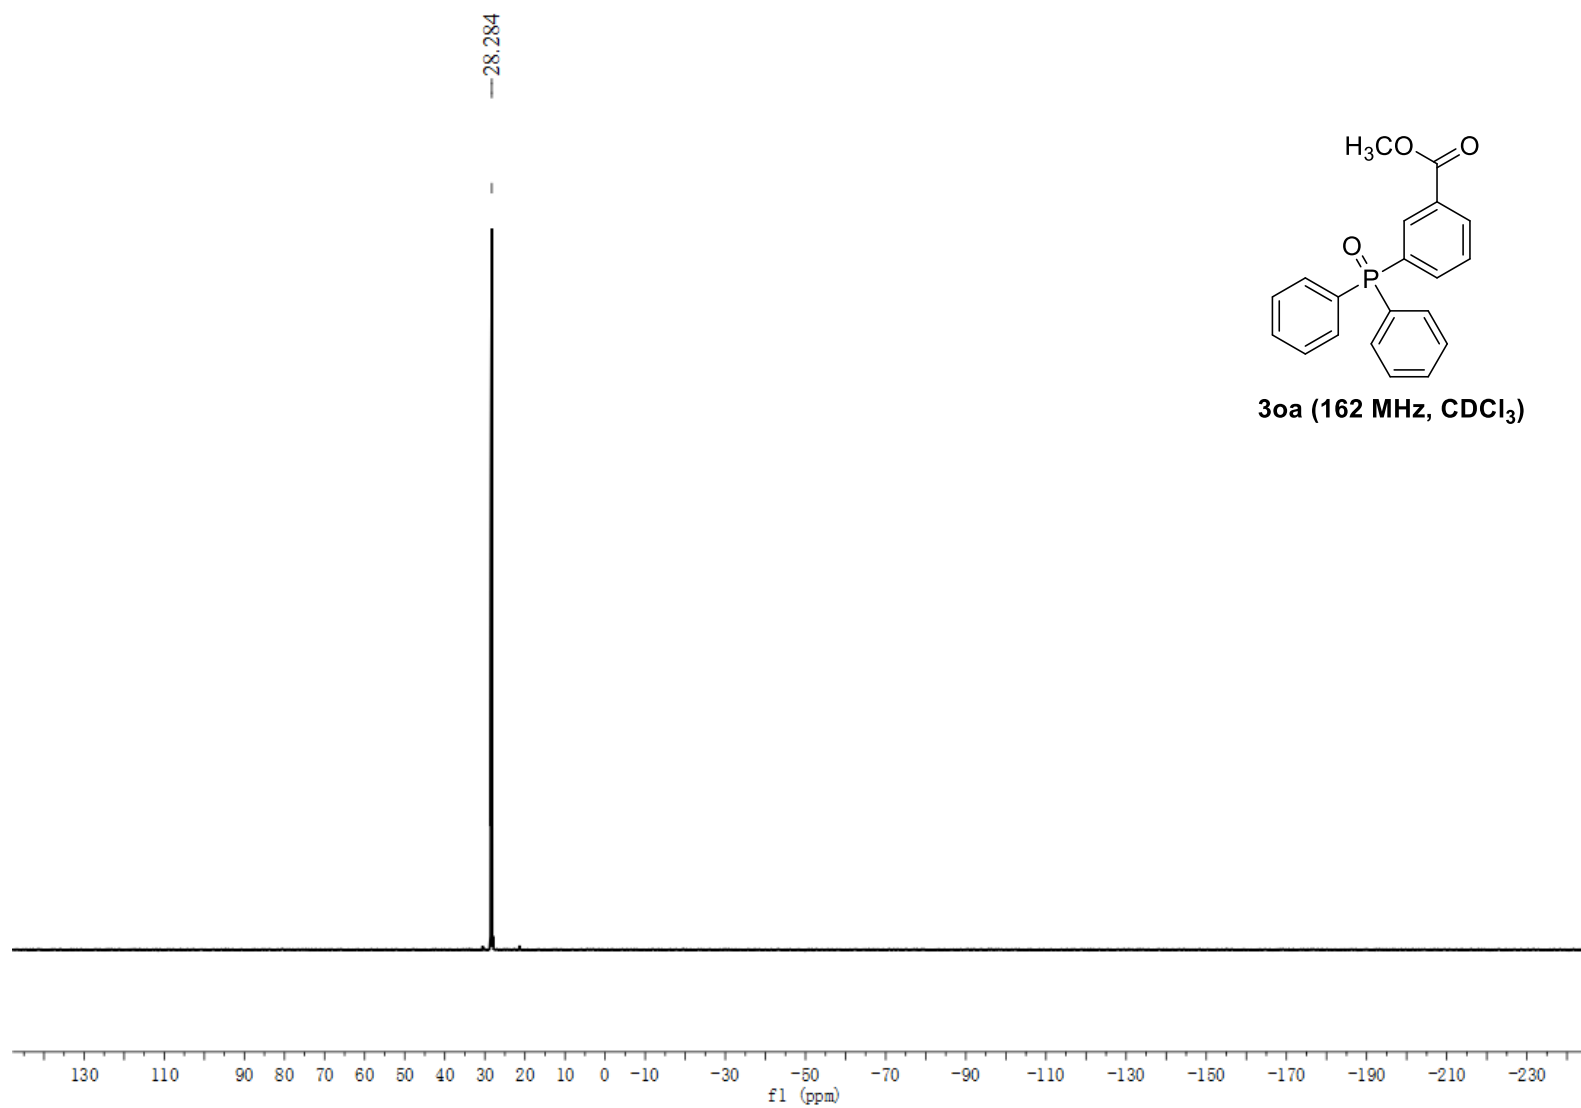

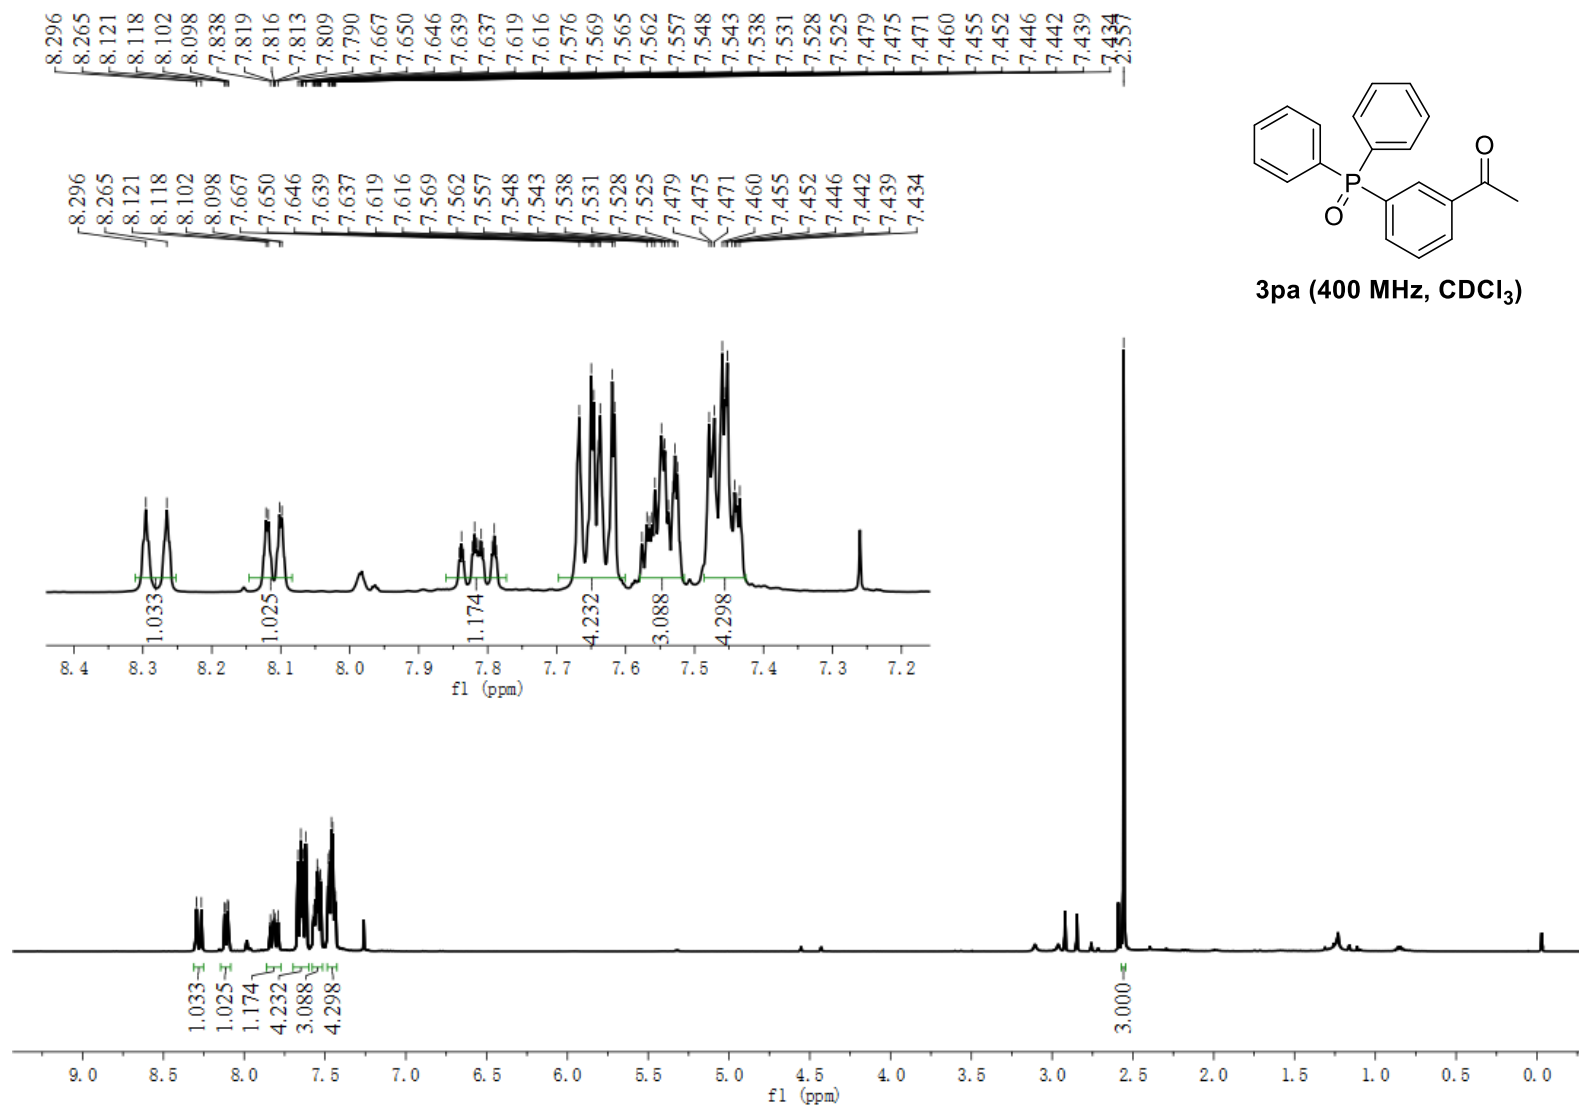



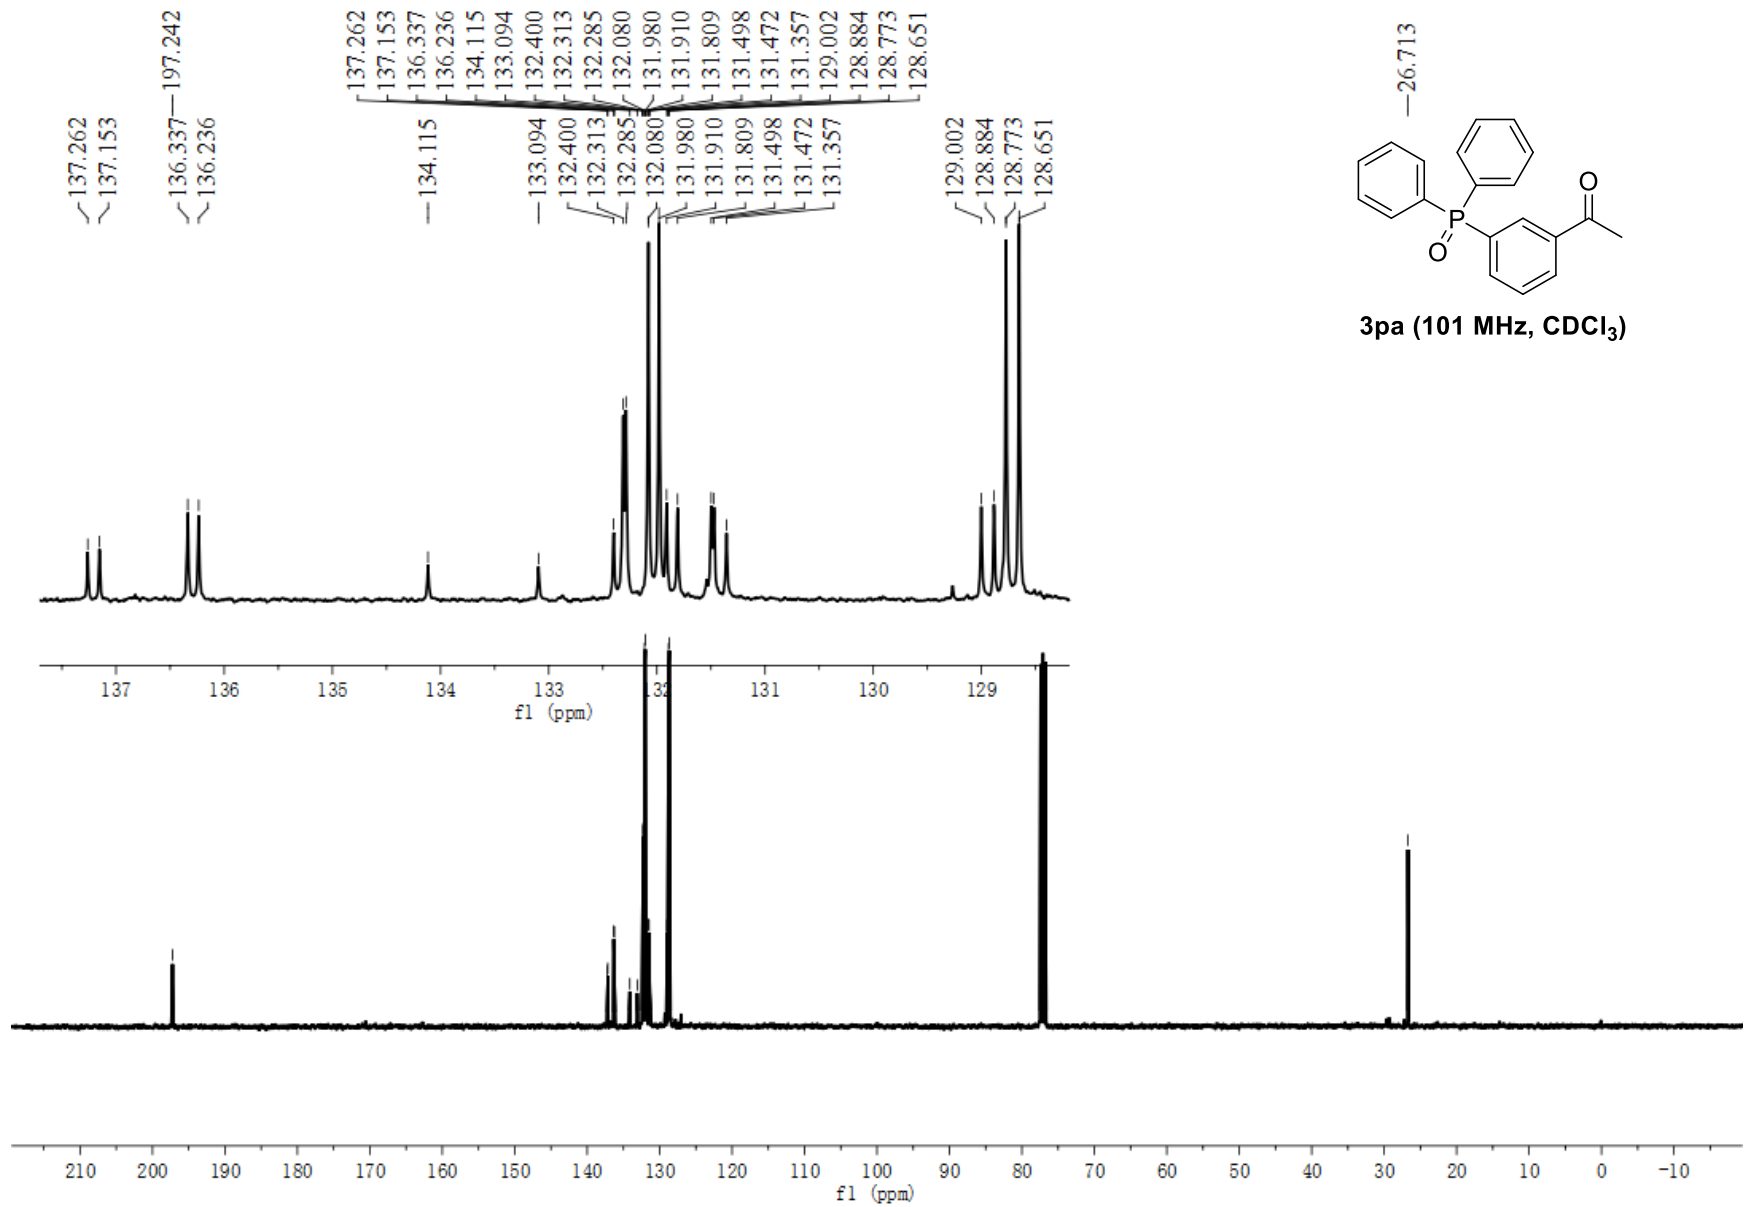

-28.515

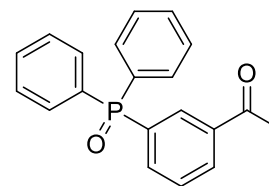

3pa (162 MHz, CDCl<sub>3</sub>)

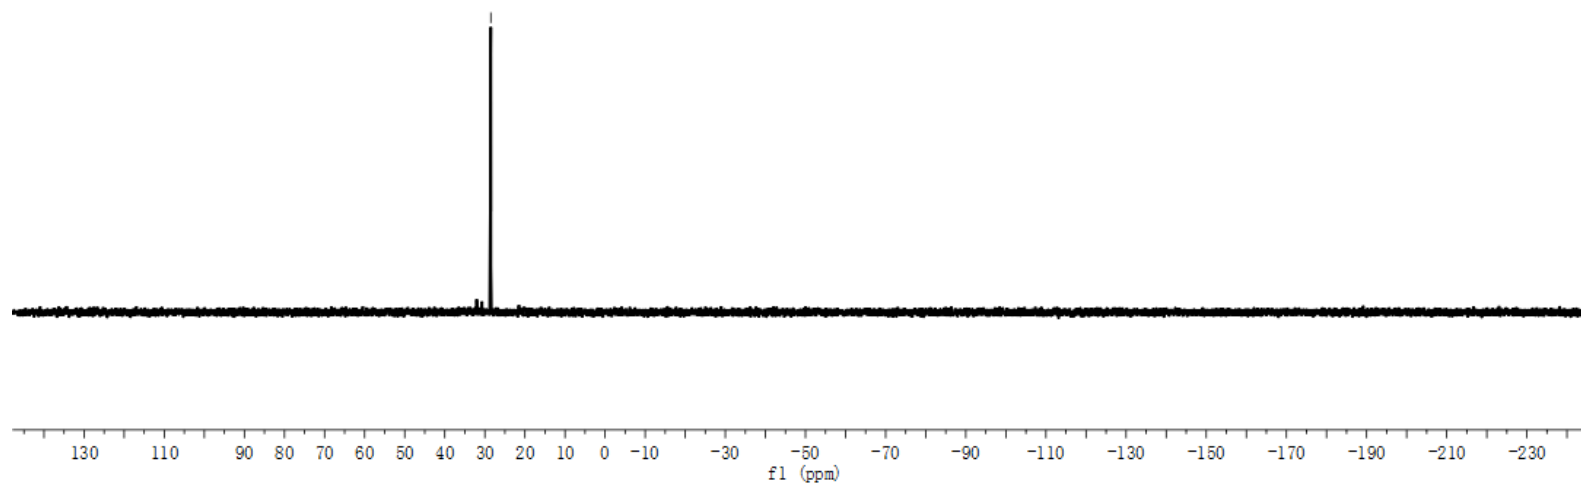

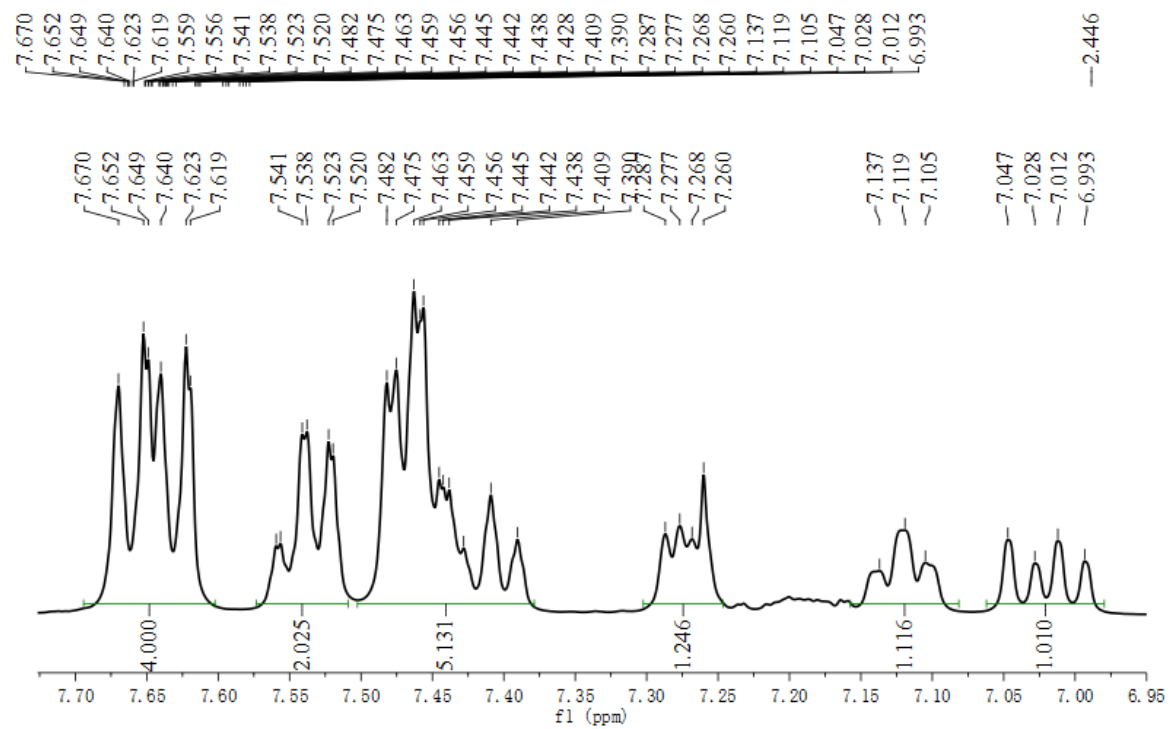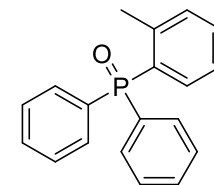

**3qa (400 MHz, CDCl<sub>3</sub>)**

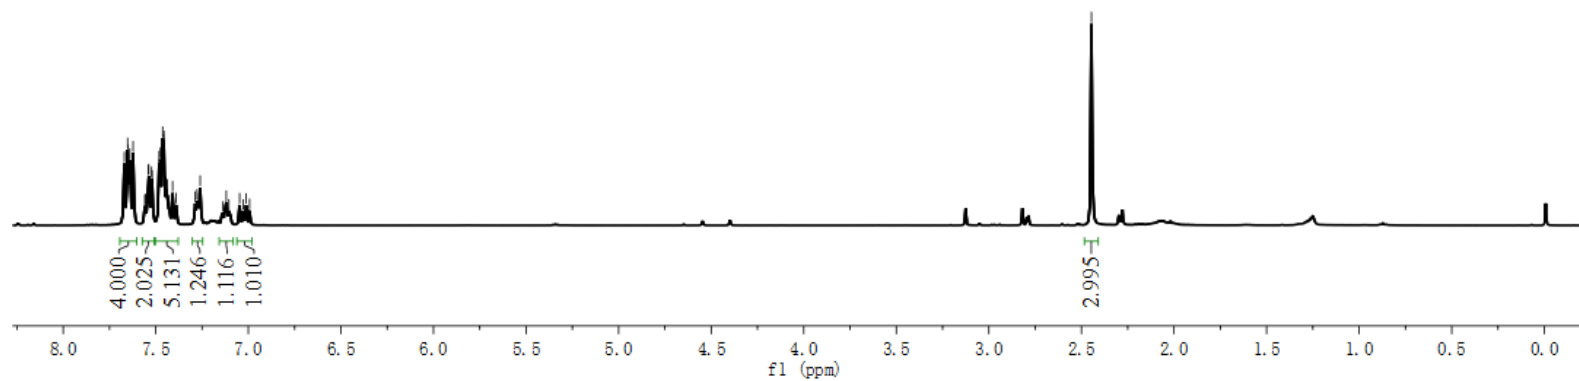

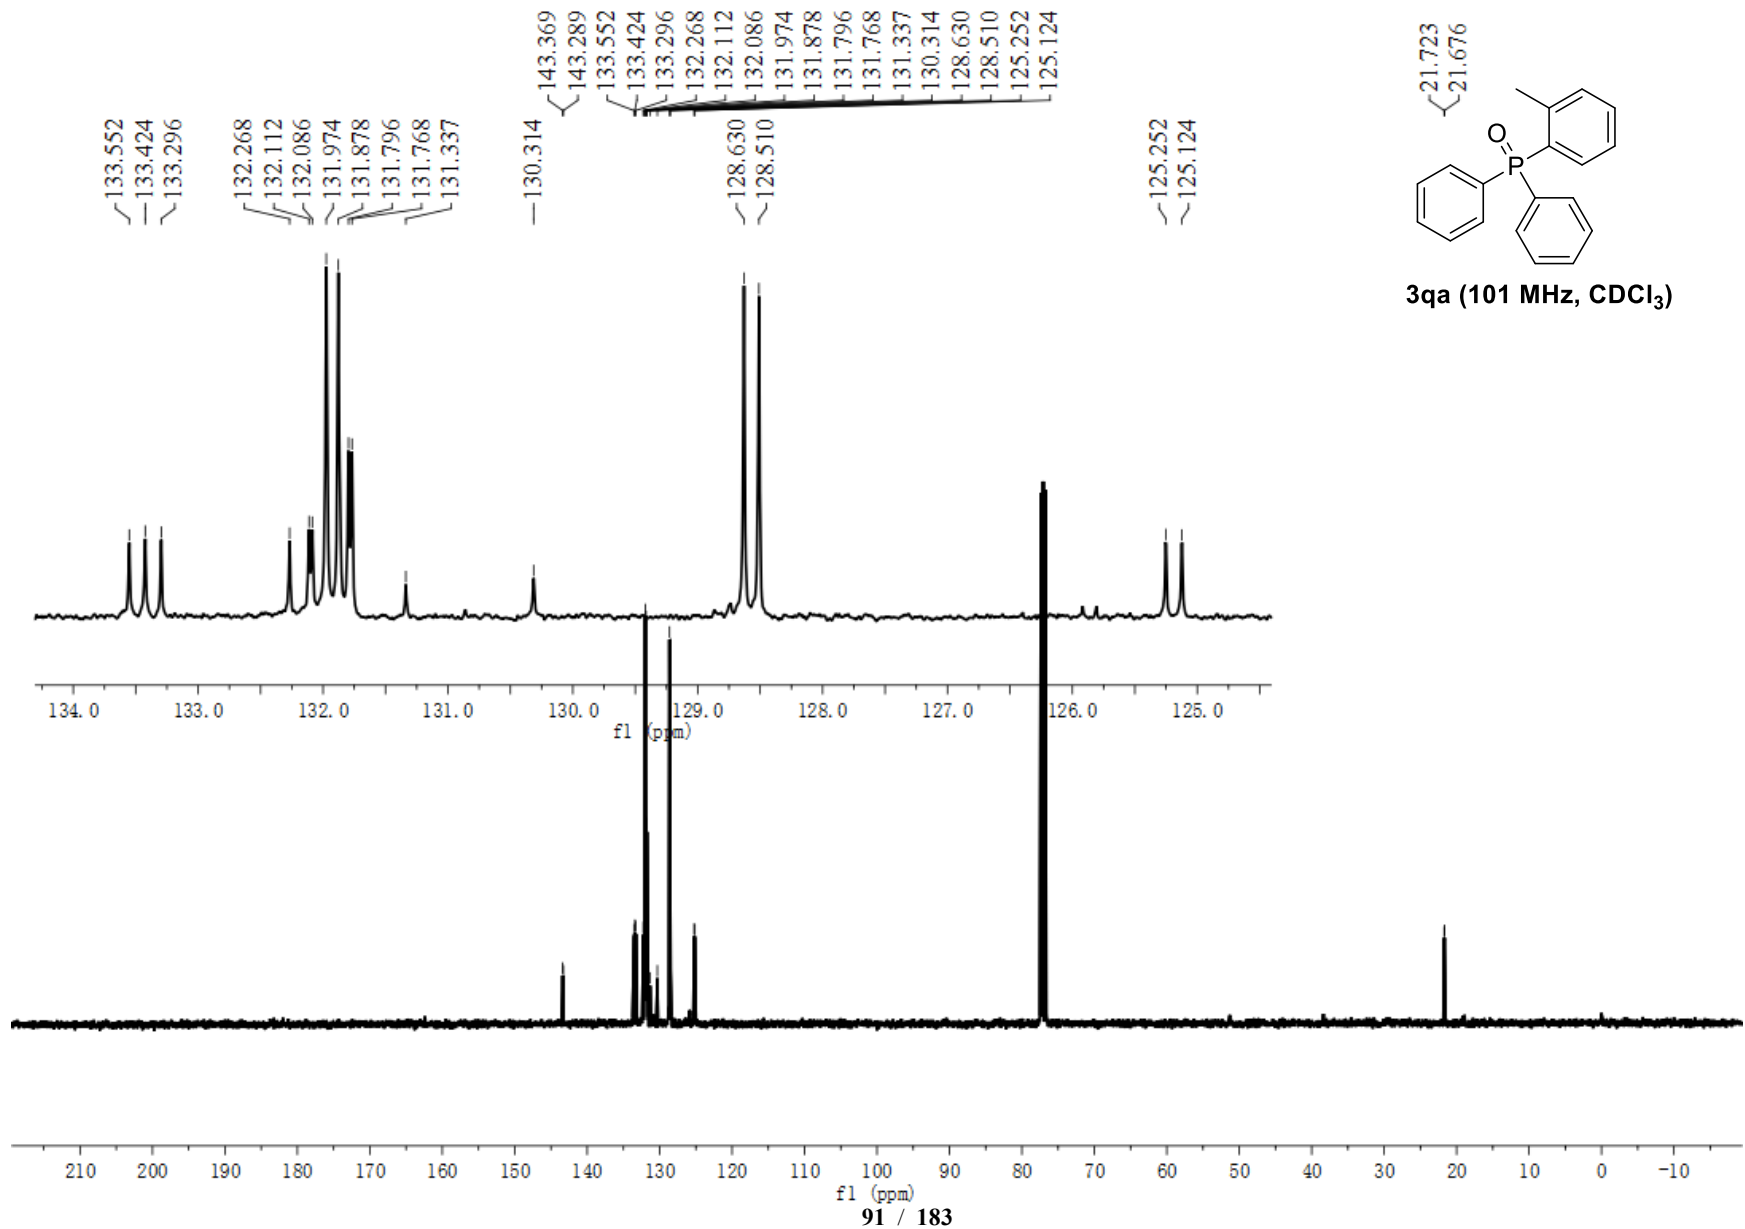

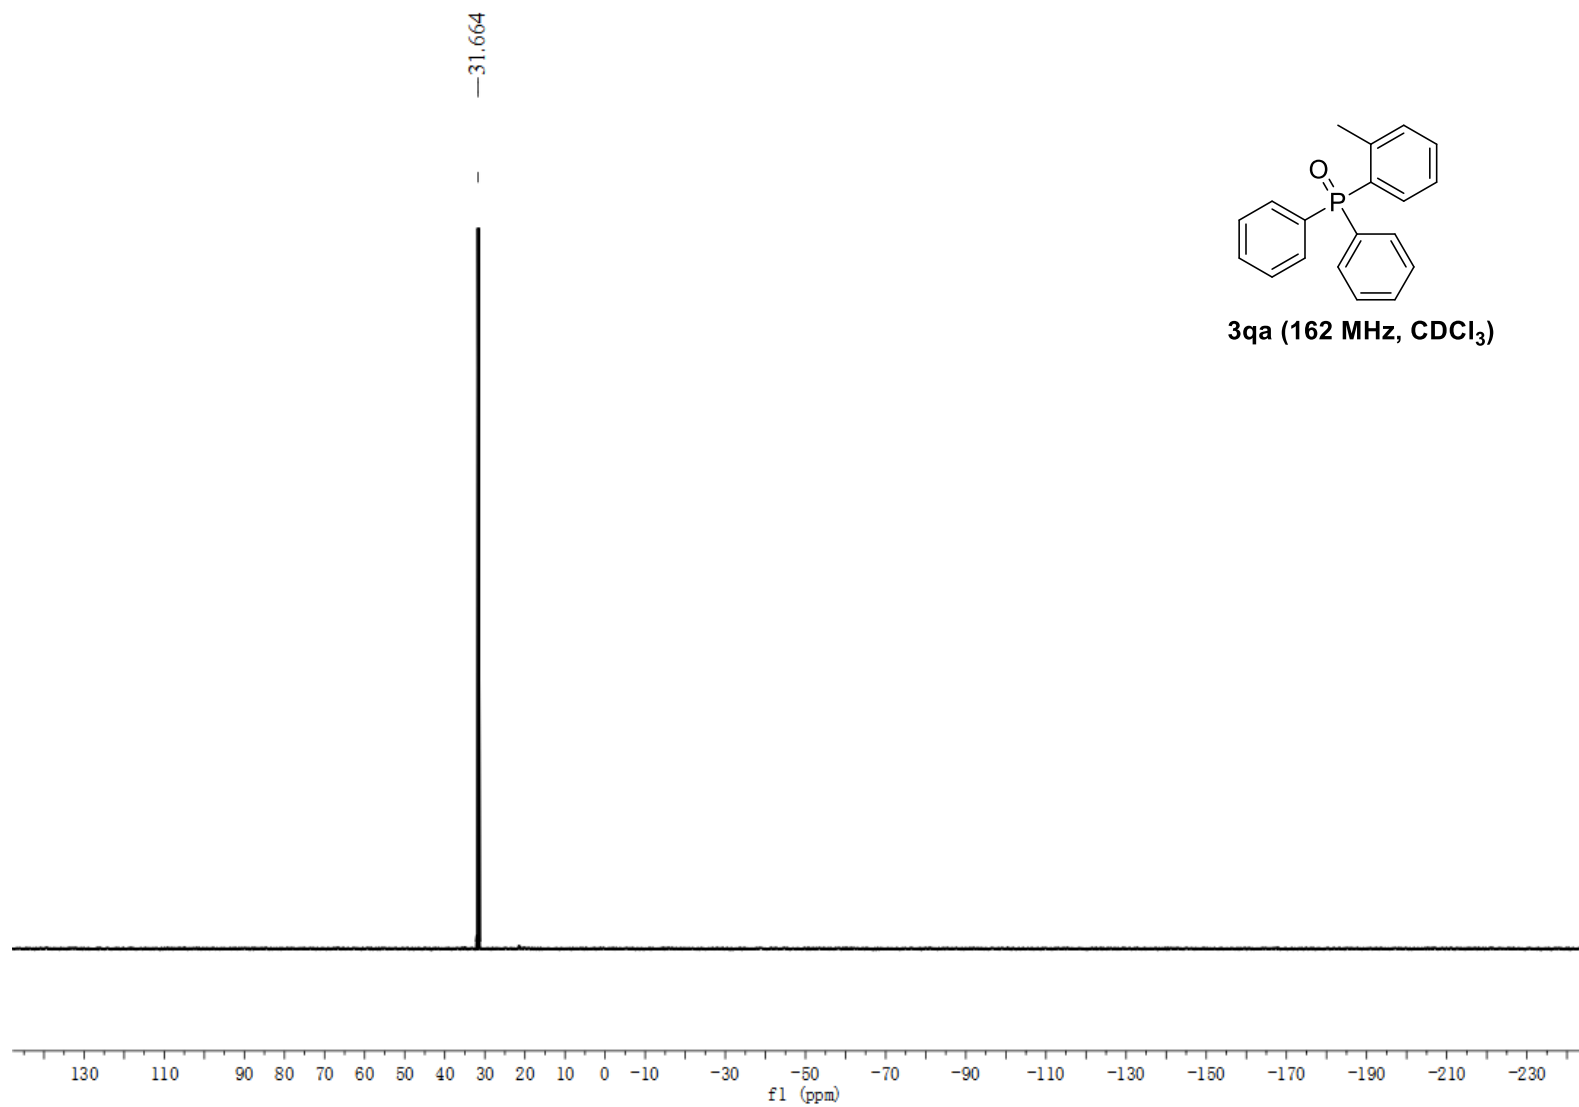

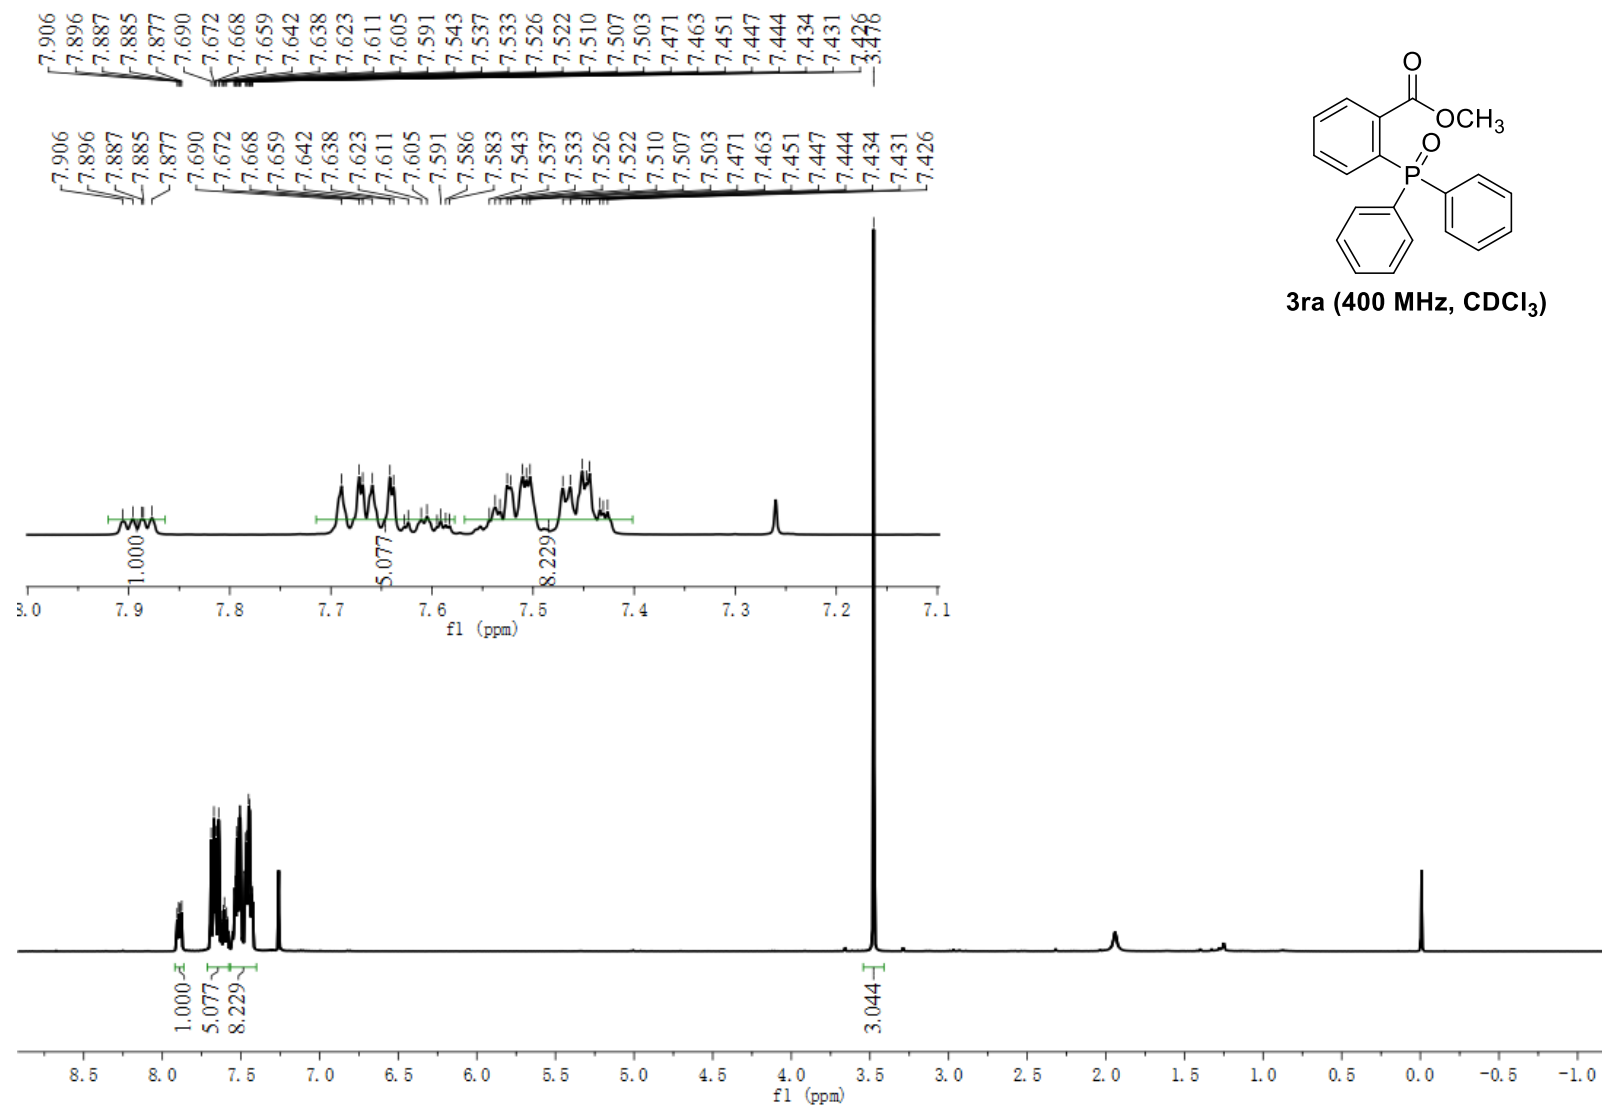

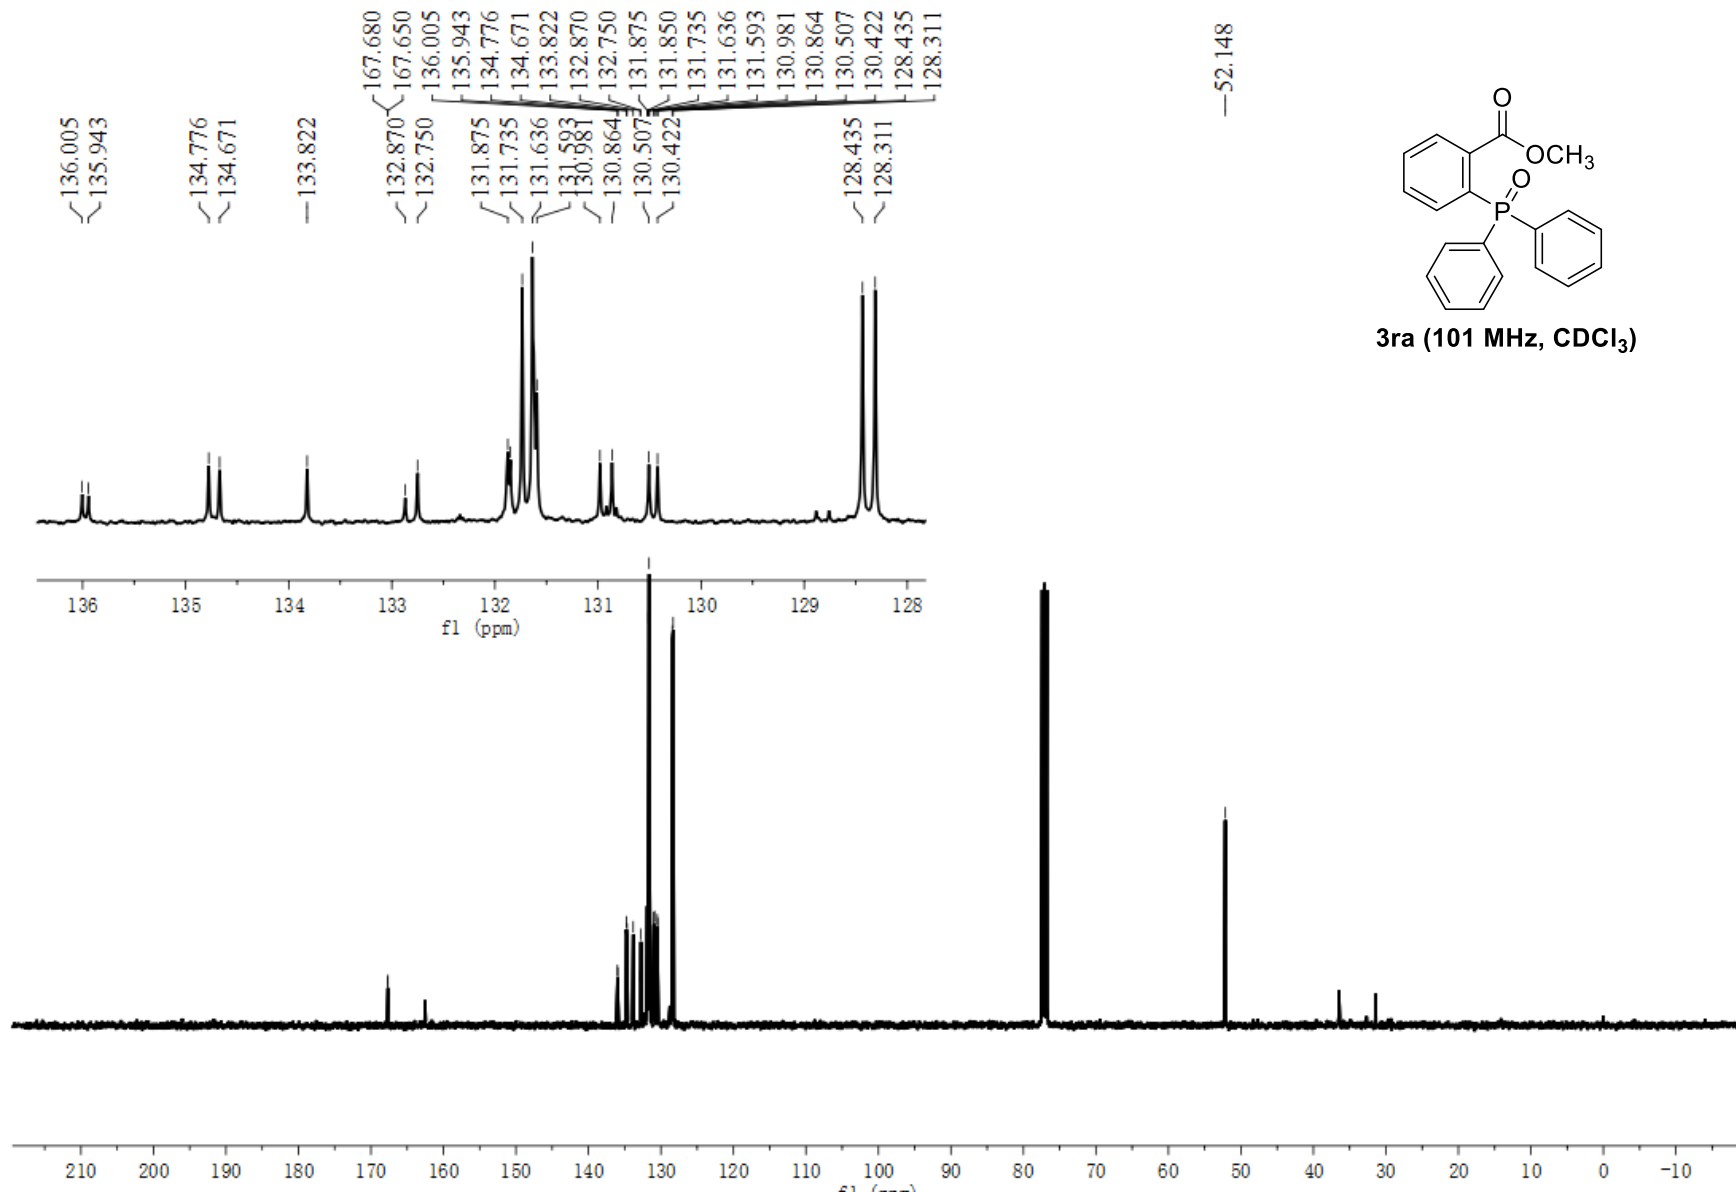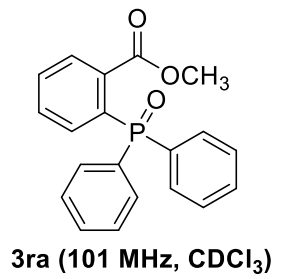

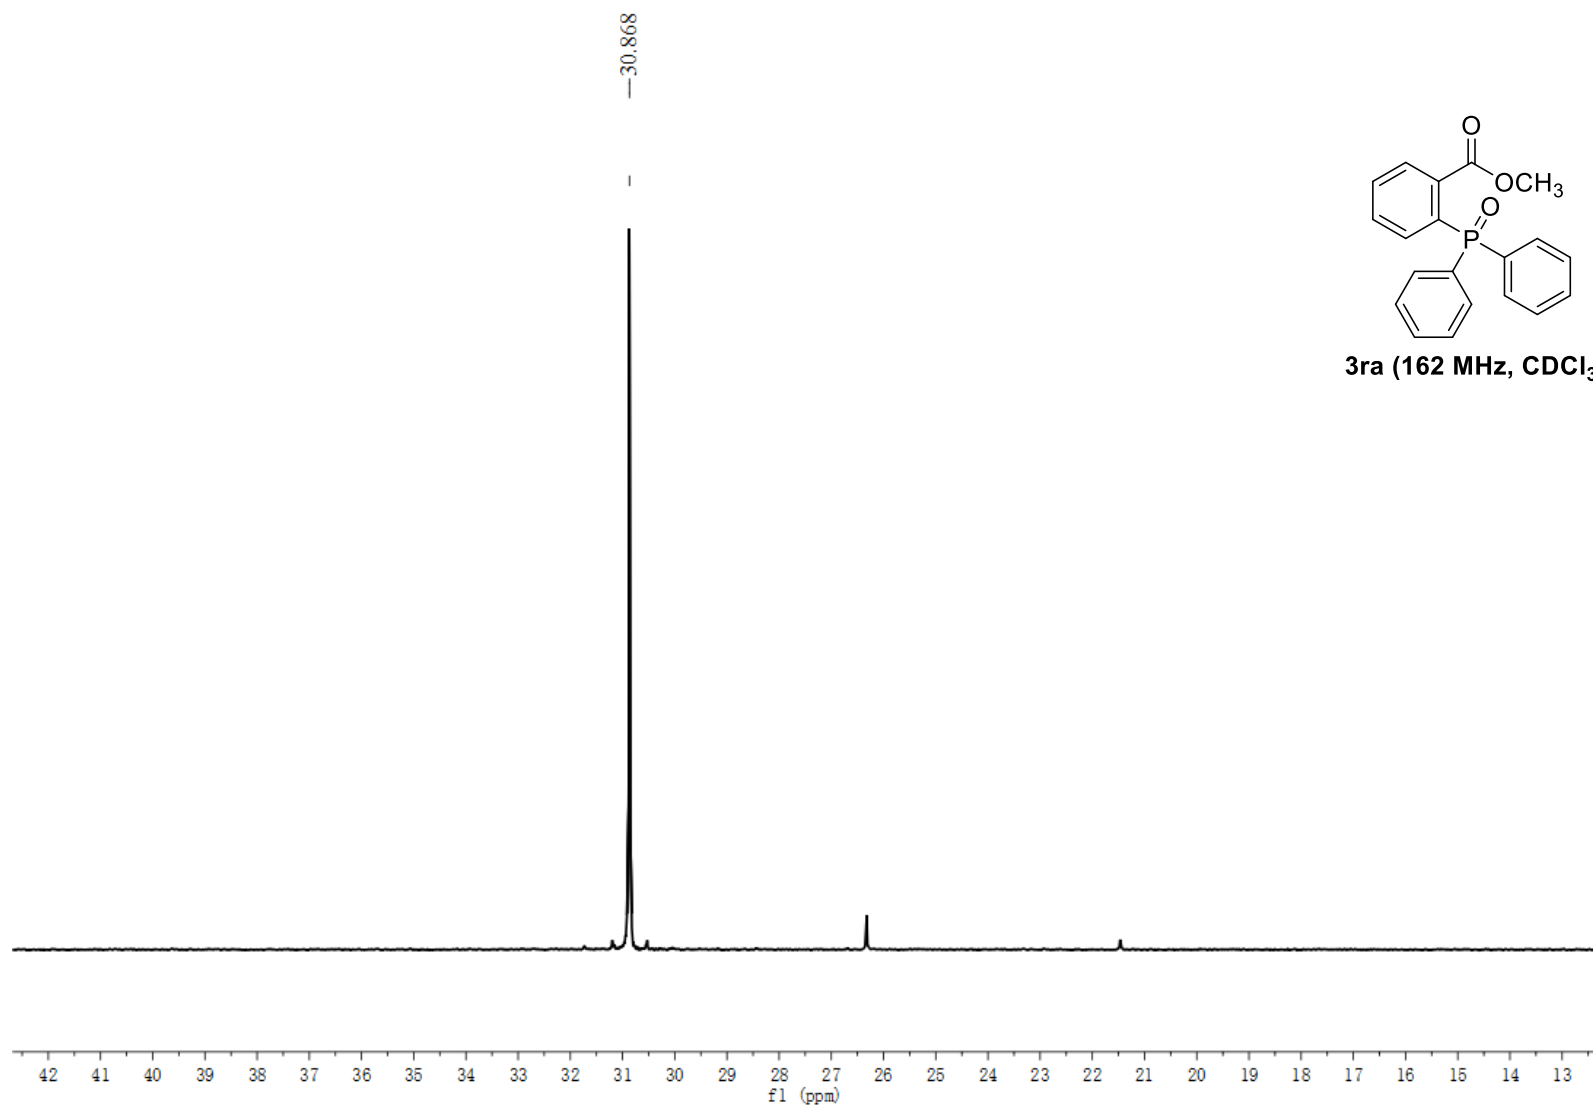



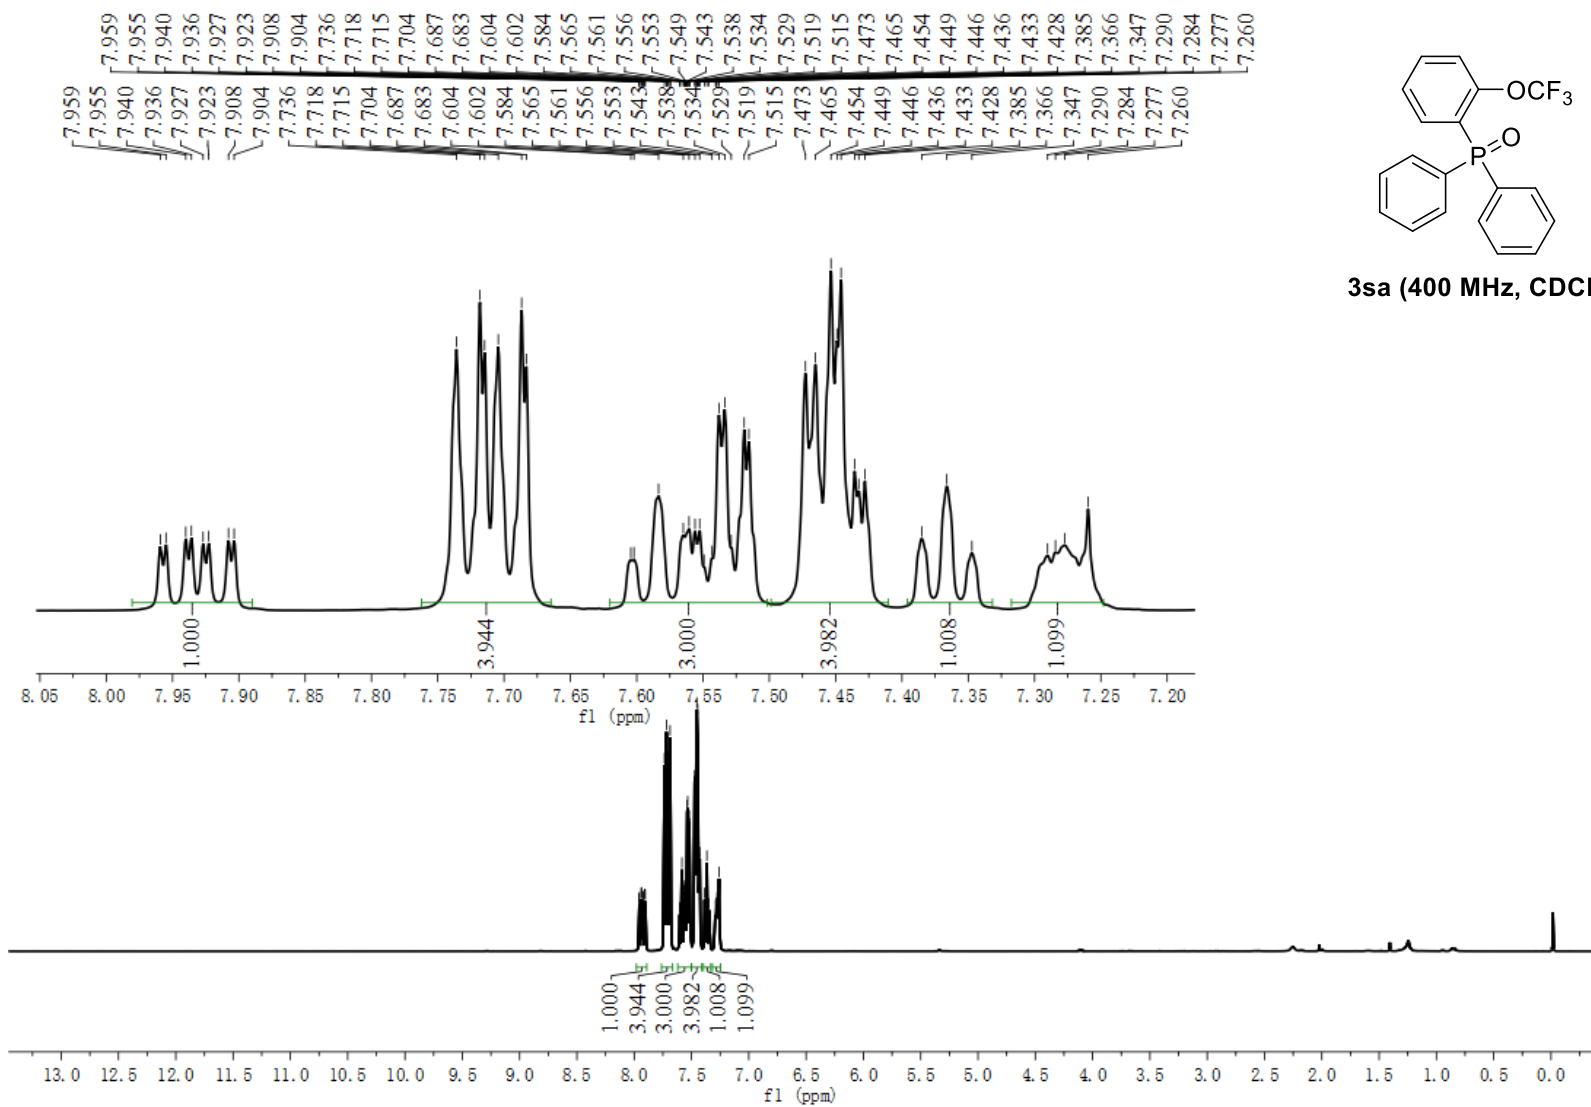

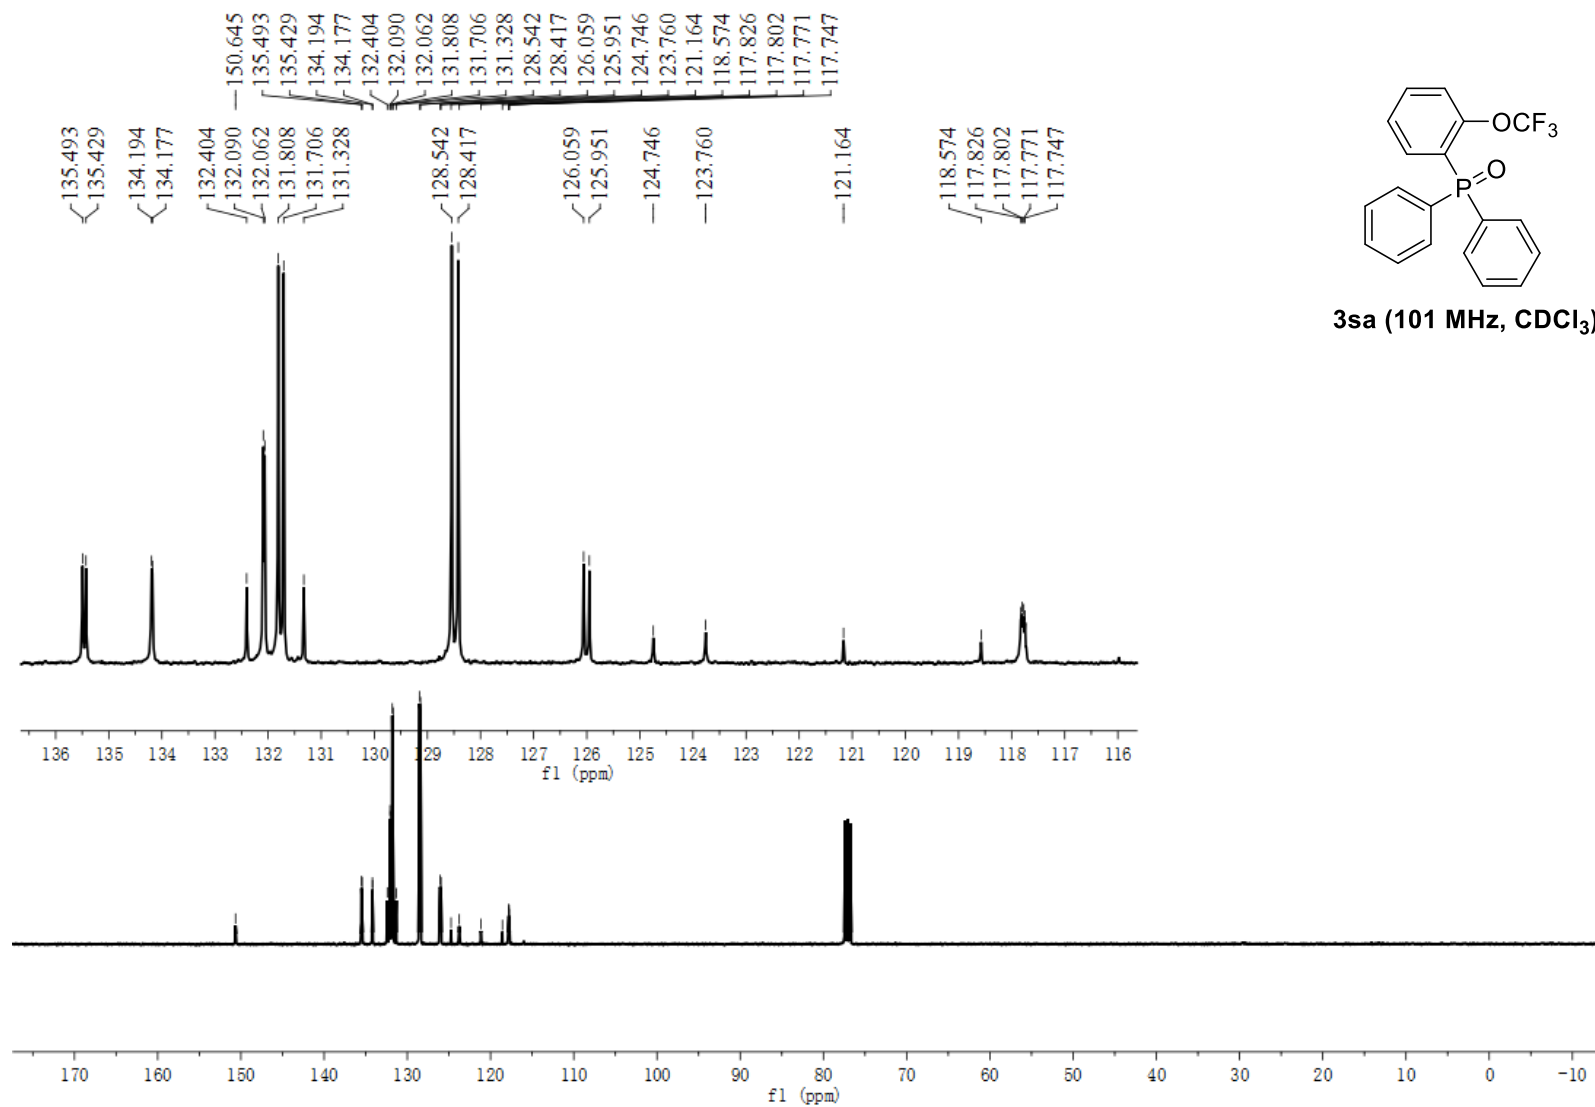

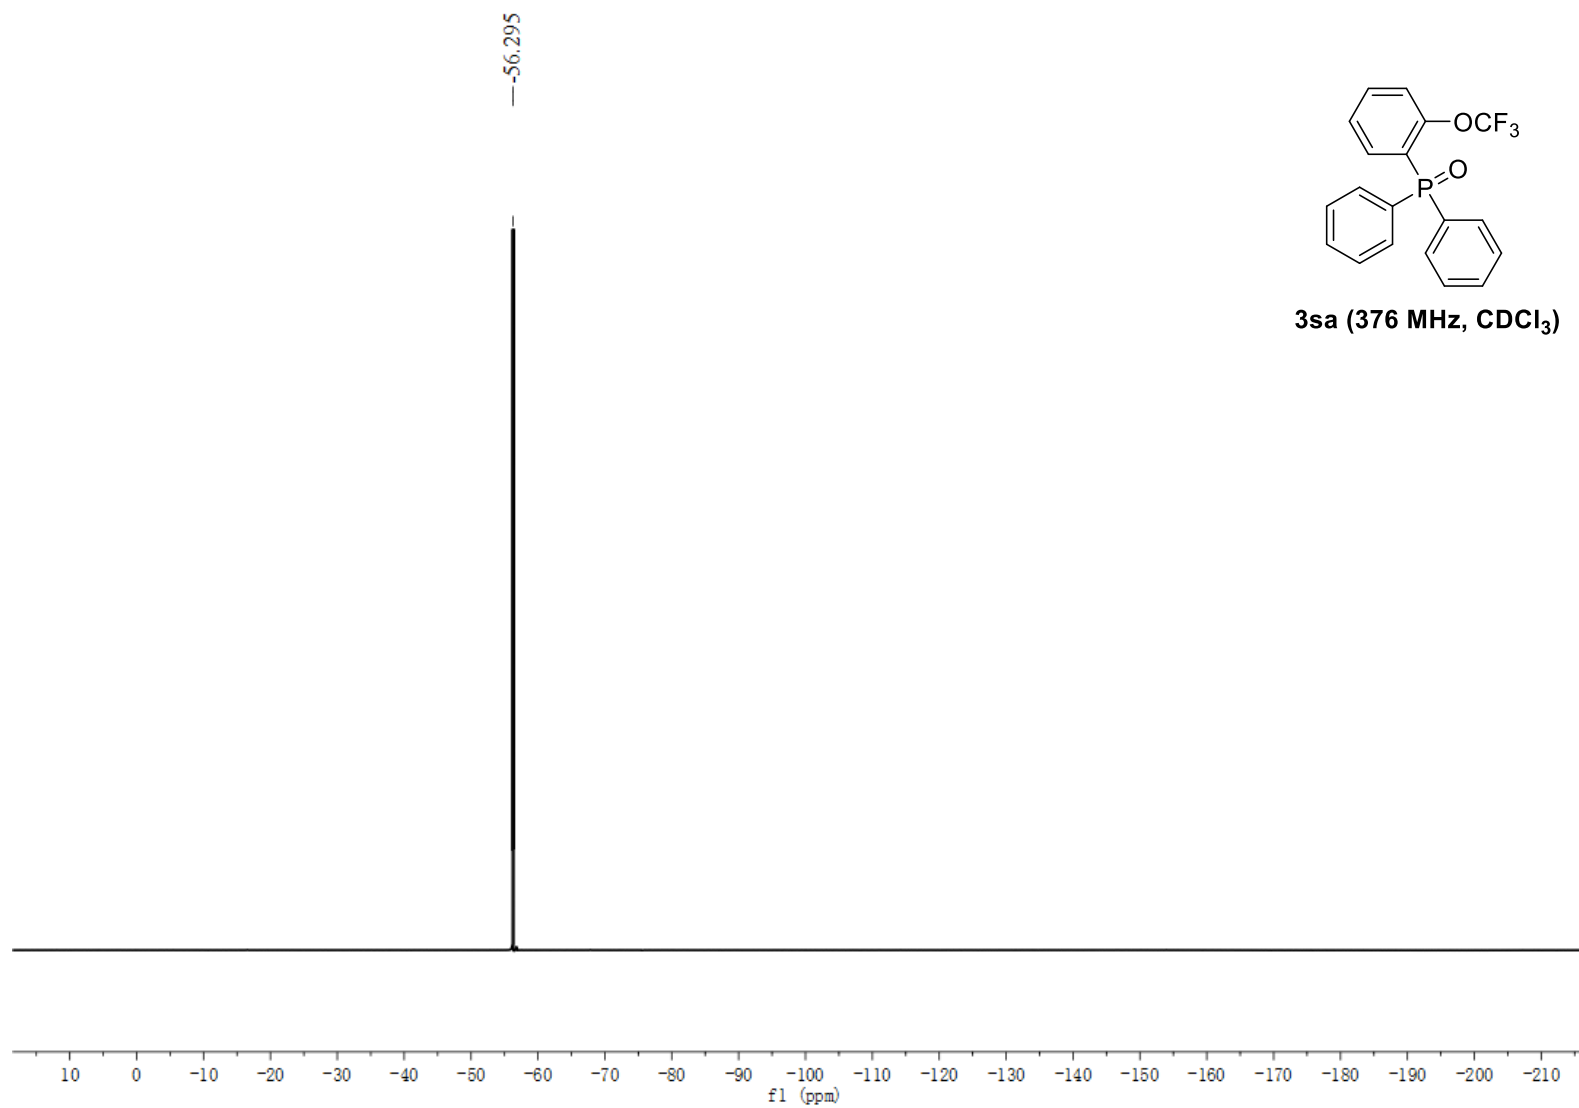

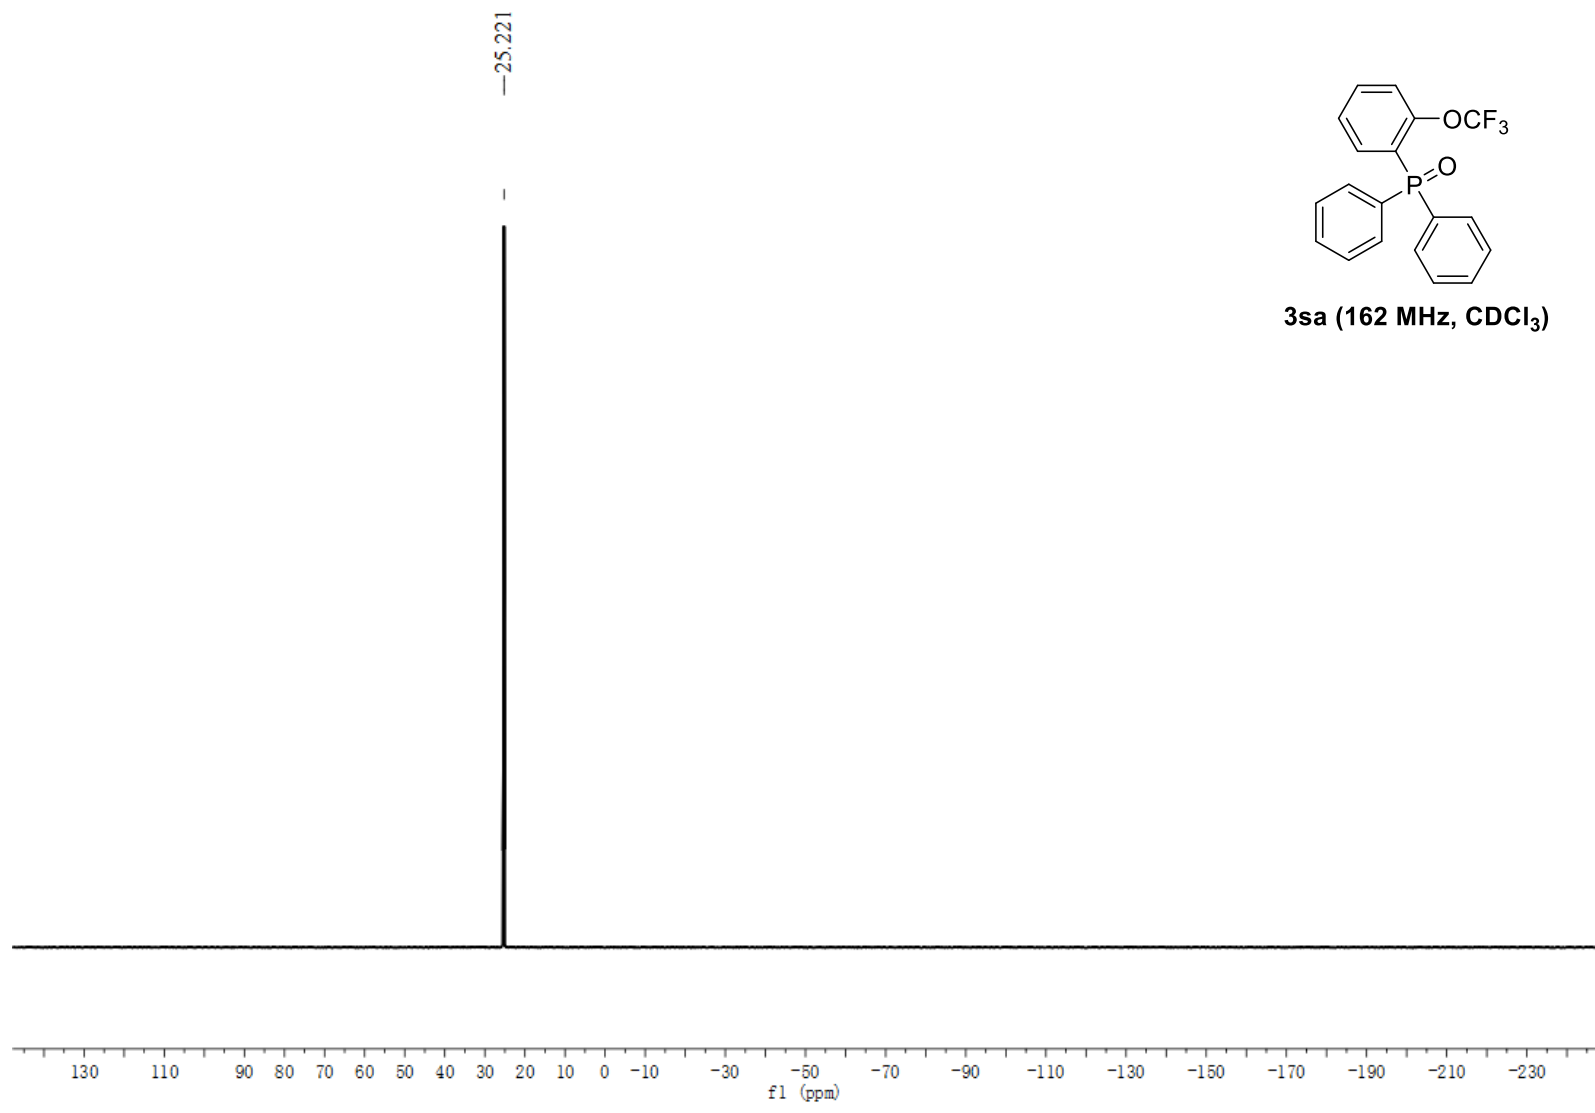

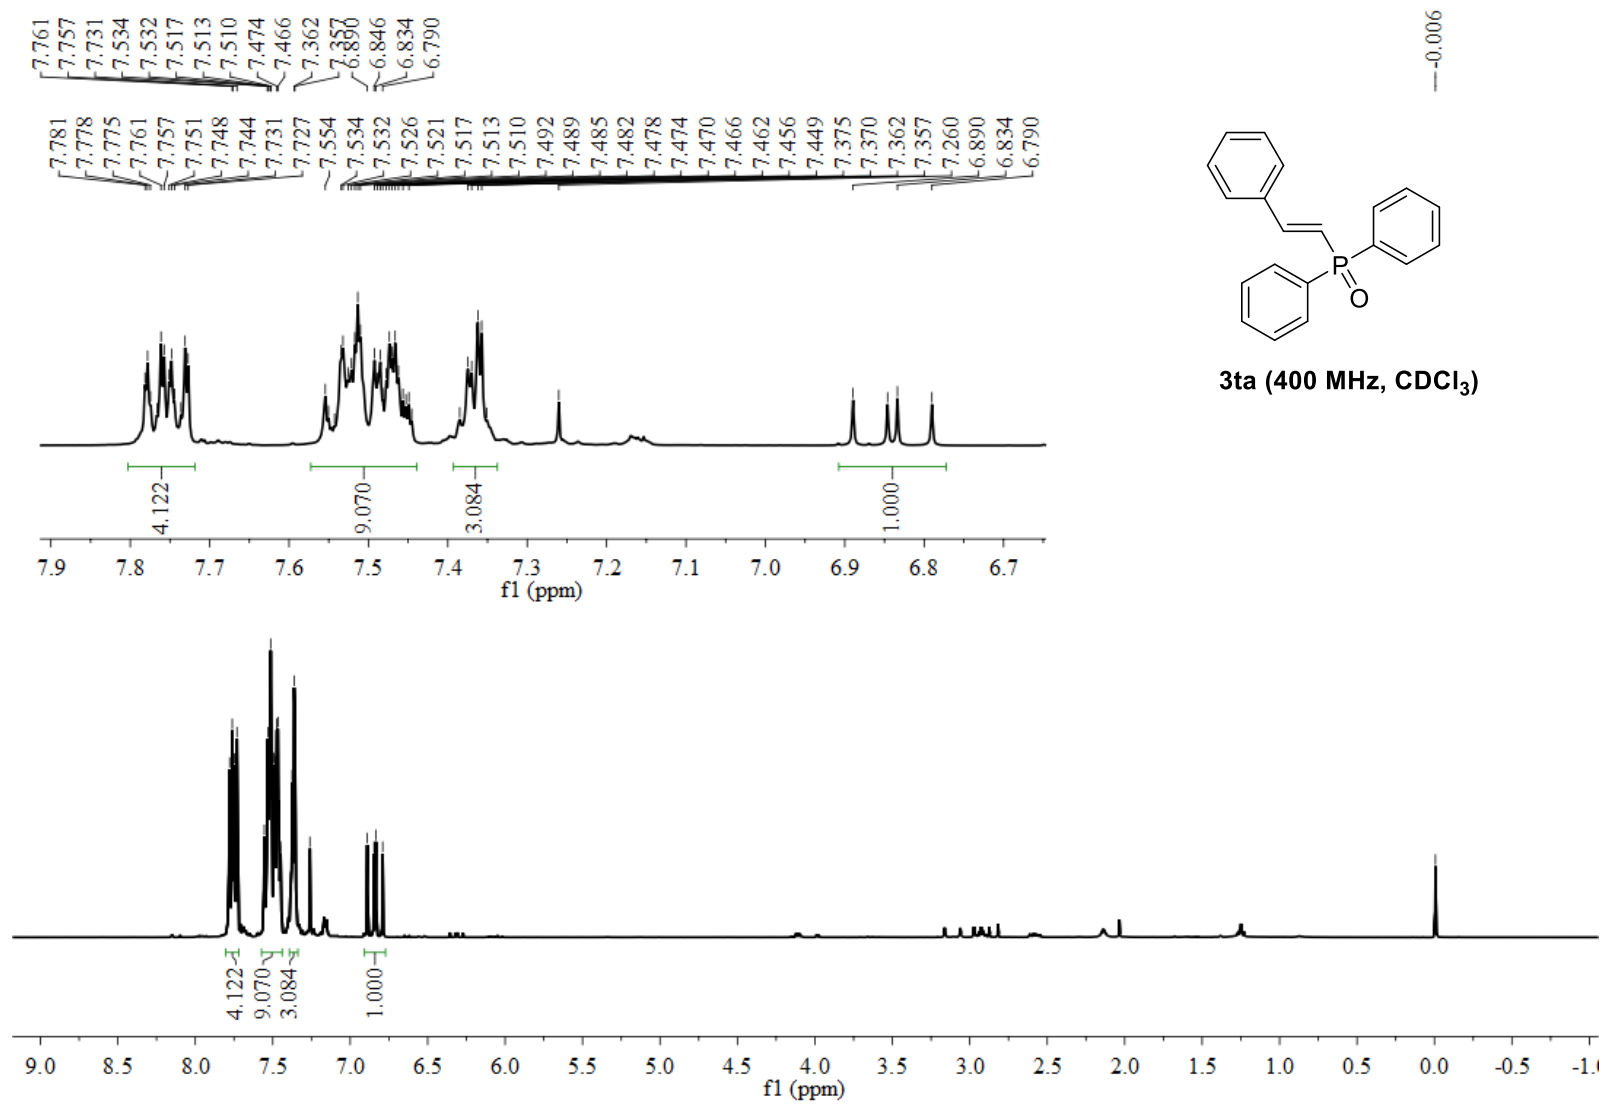

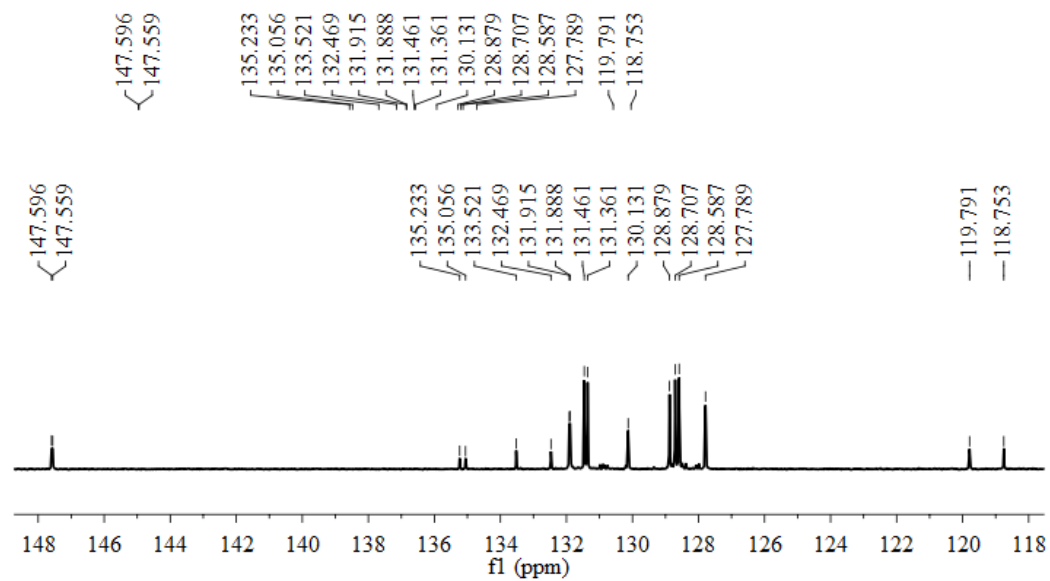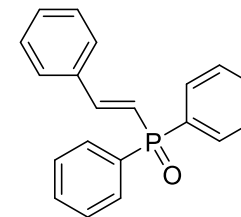

3ta (101 MHz, CDCl<sub>3</sub>)

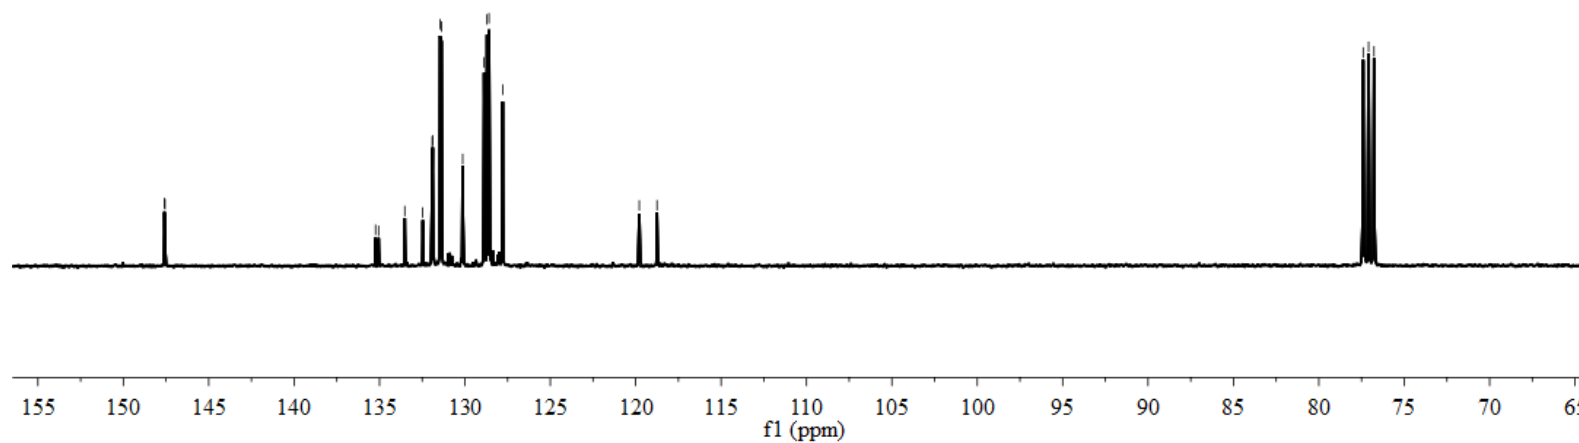

—24.432

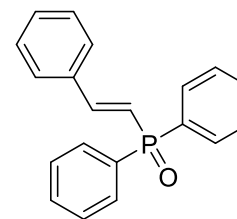

**3ta (162 MHz, CDCl<sub>3</sub>)**

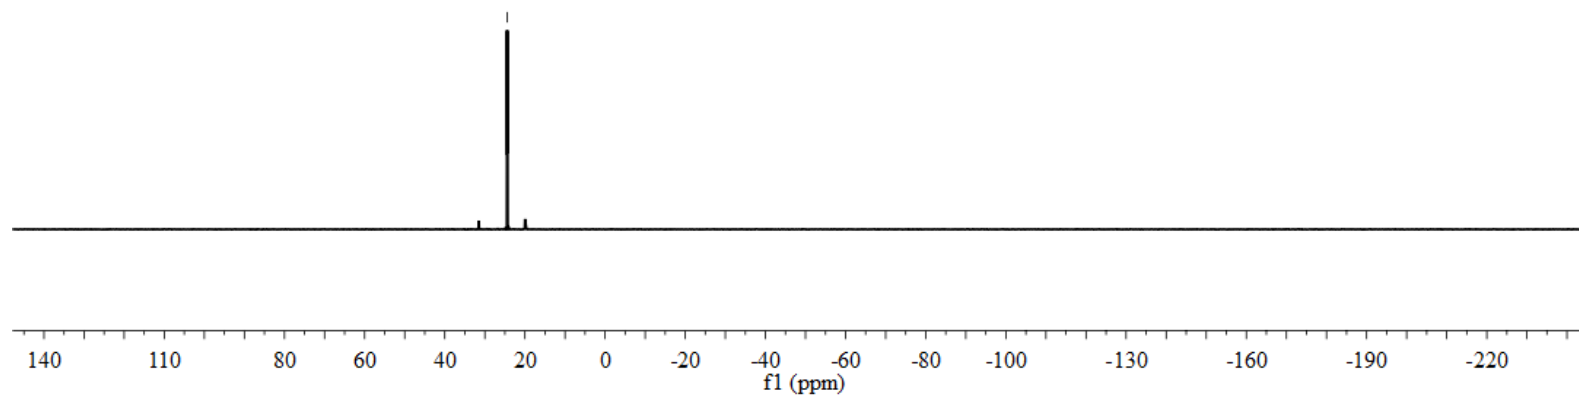

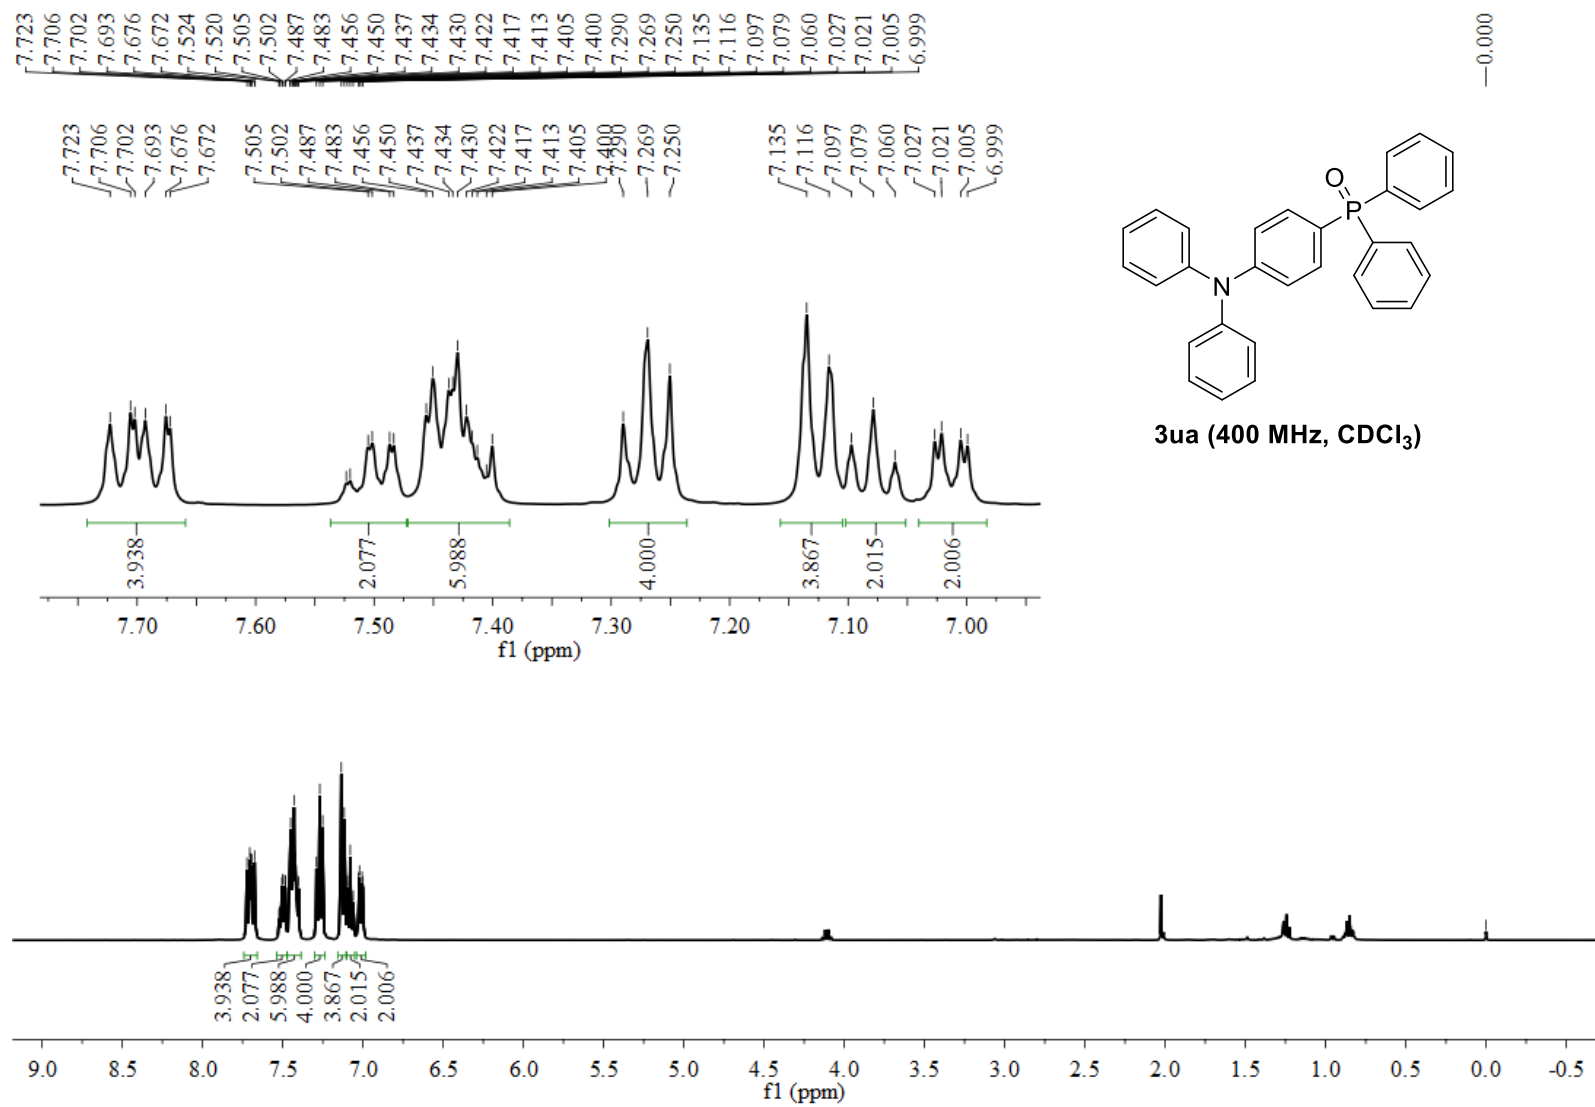



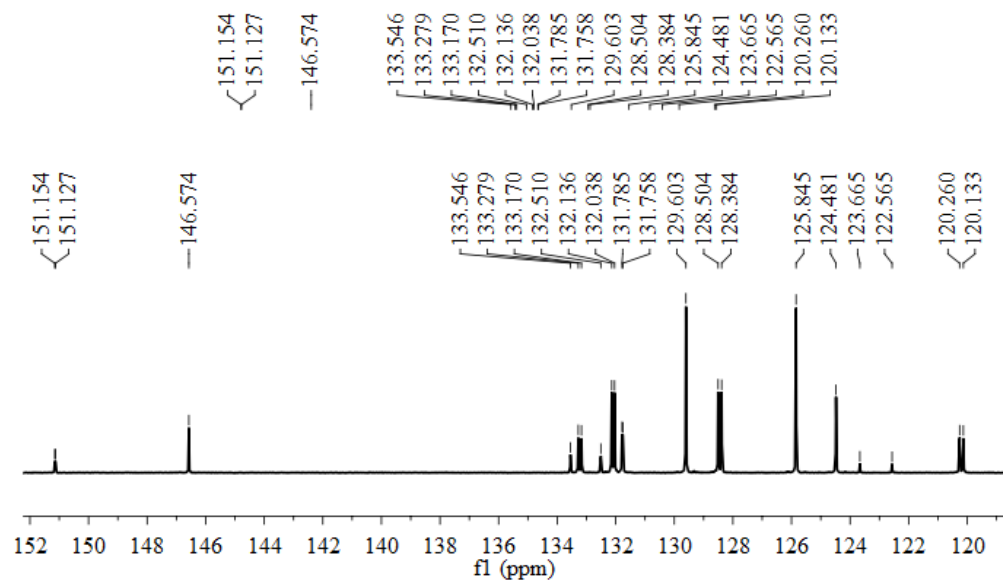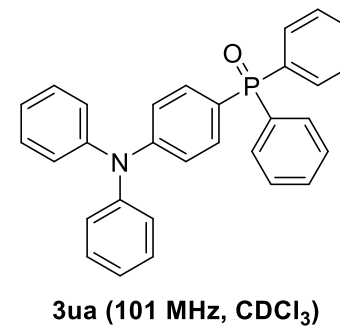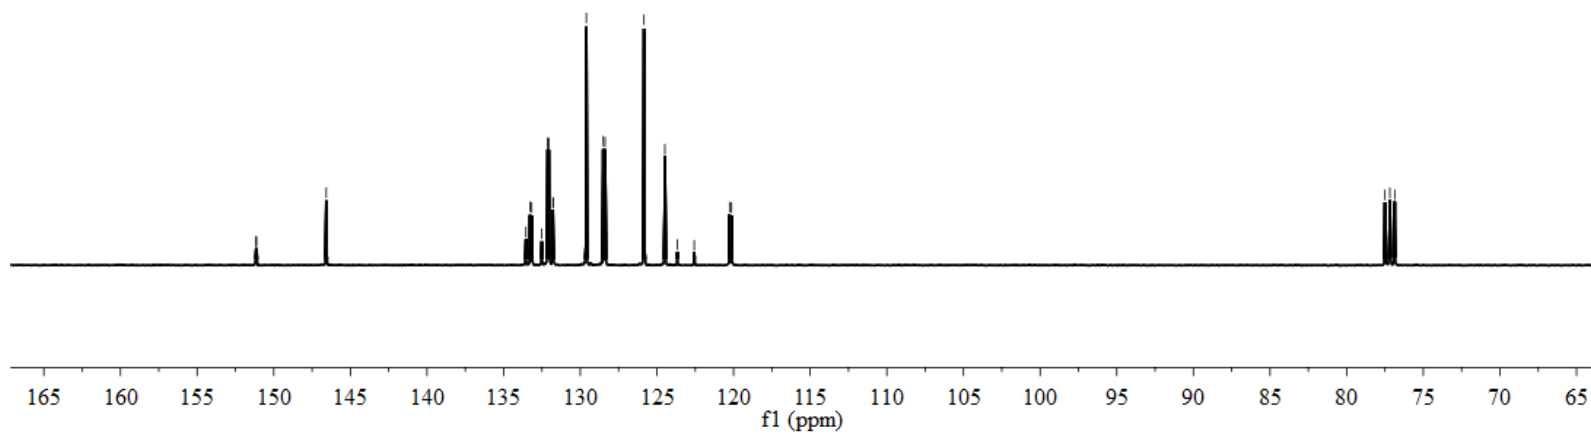

—29.023

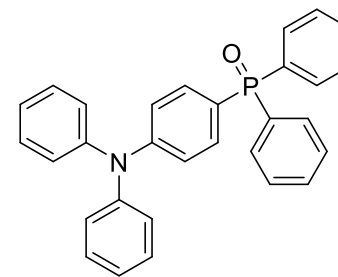

**3ua (162 MHz, CDCl<sub>3</sub>)**

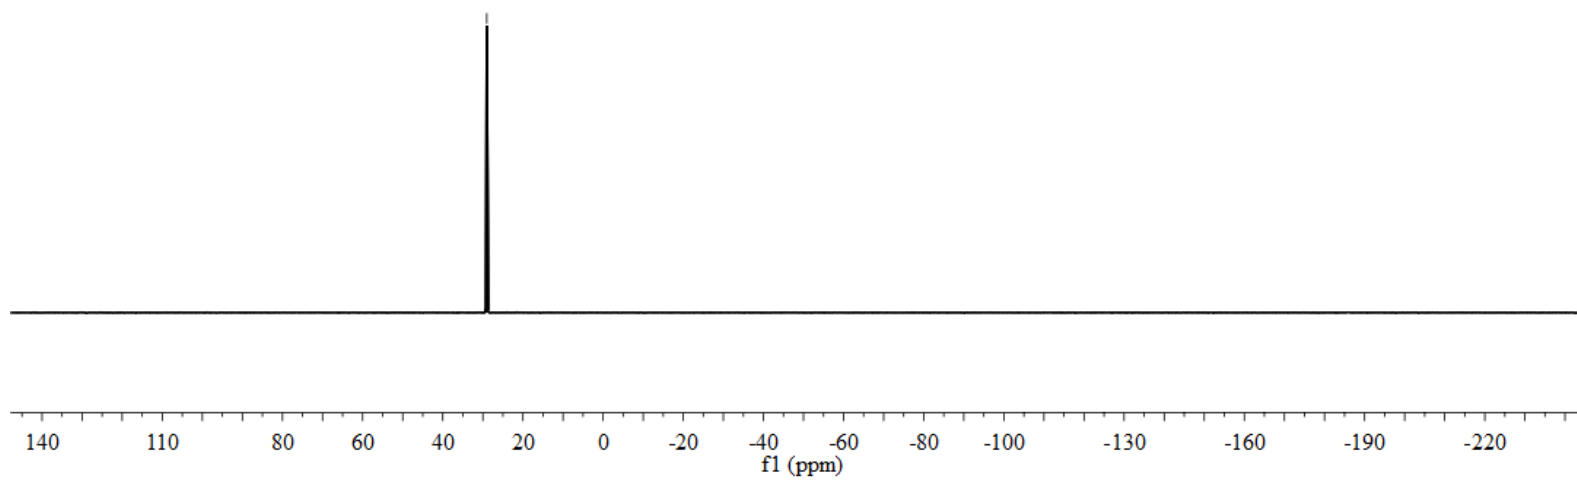

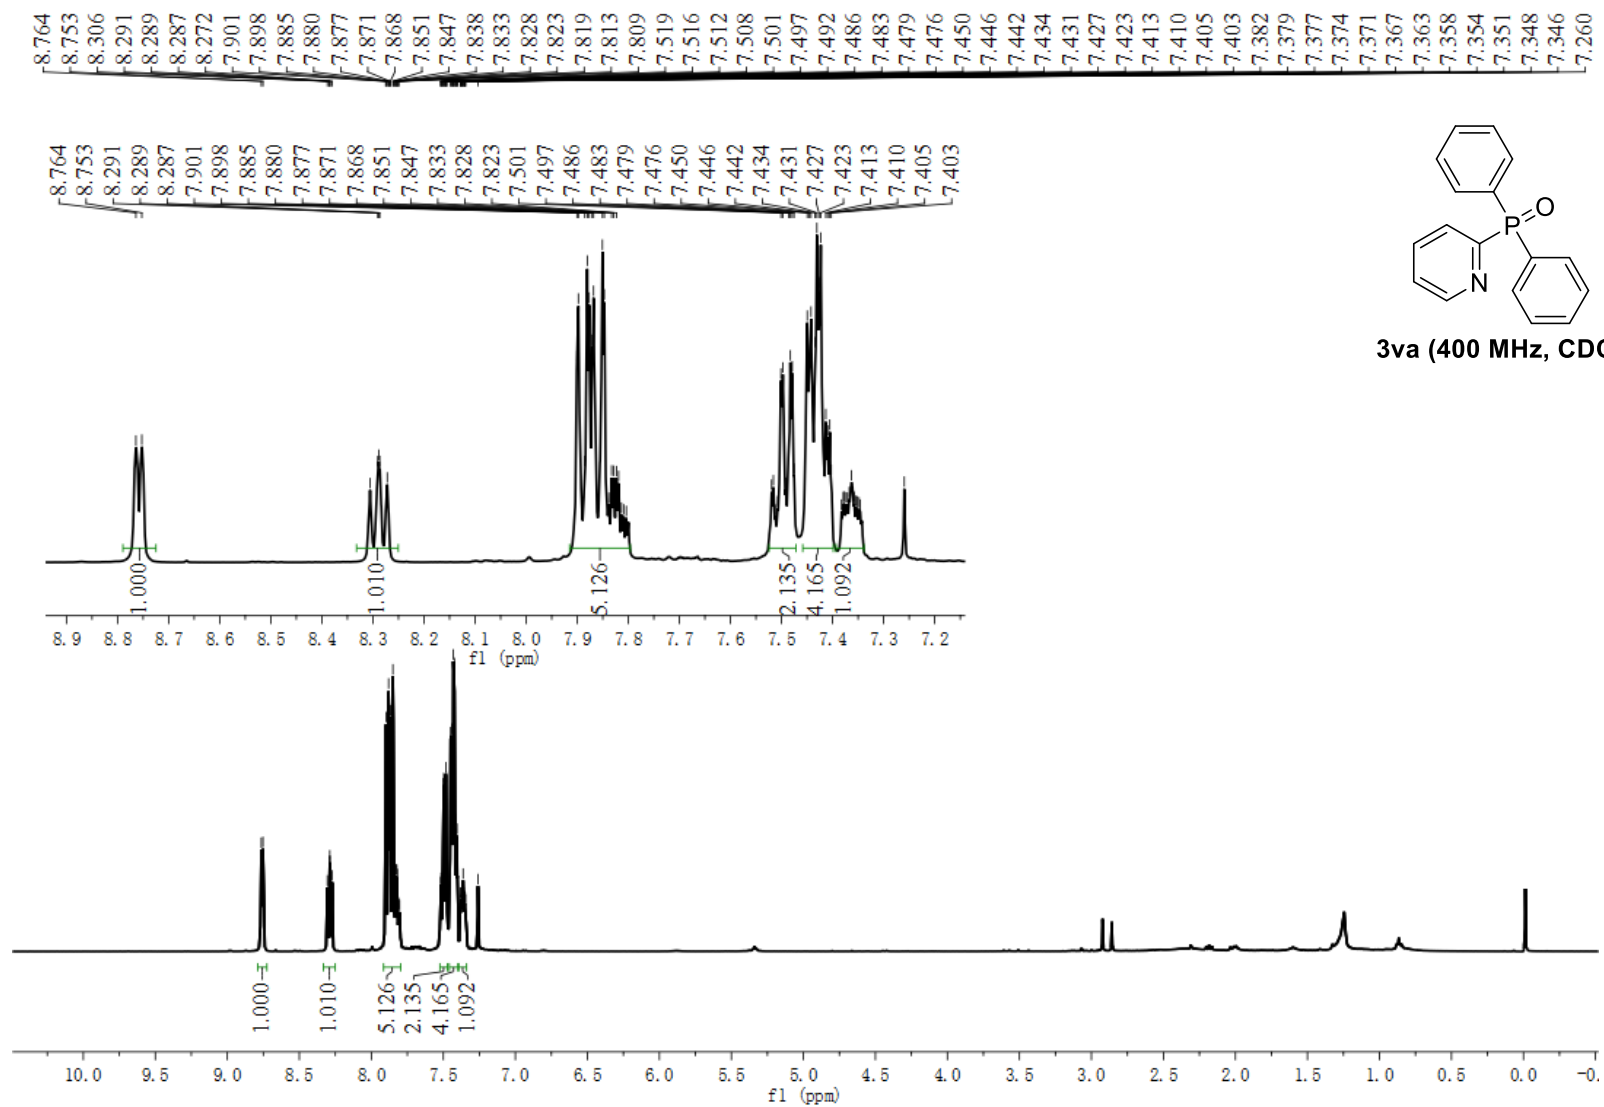

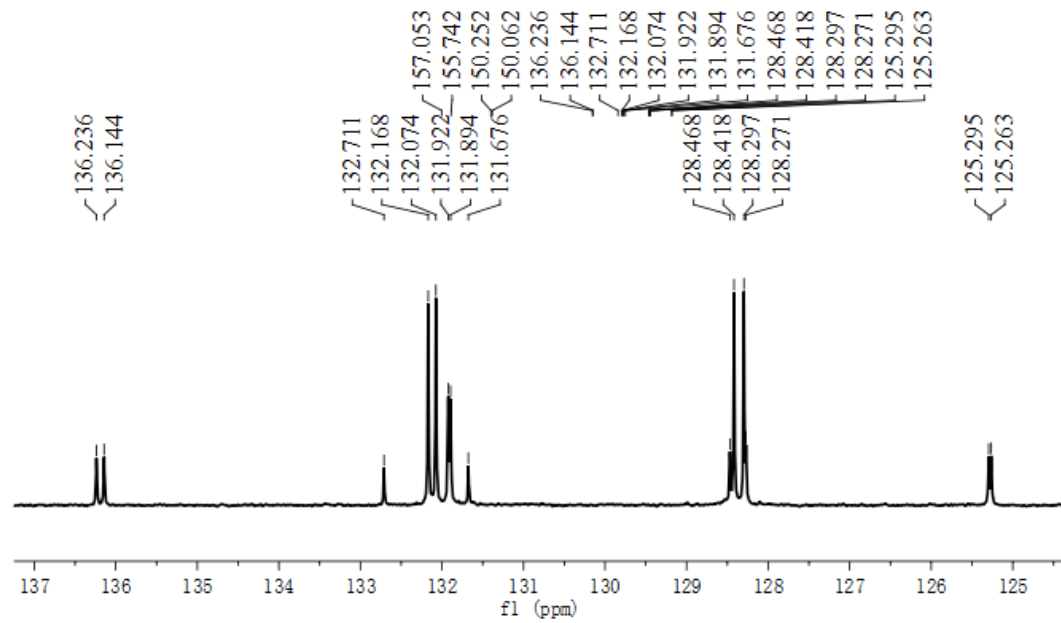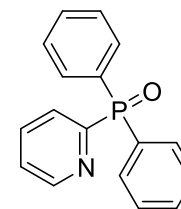

**3va (101 MHz, CDCl<sub>3</sub>)**

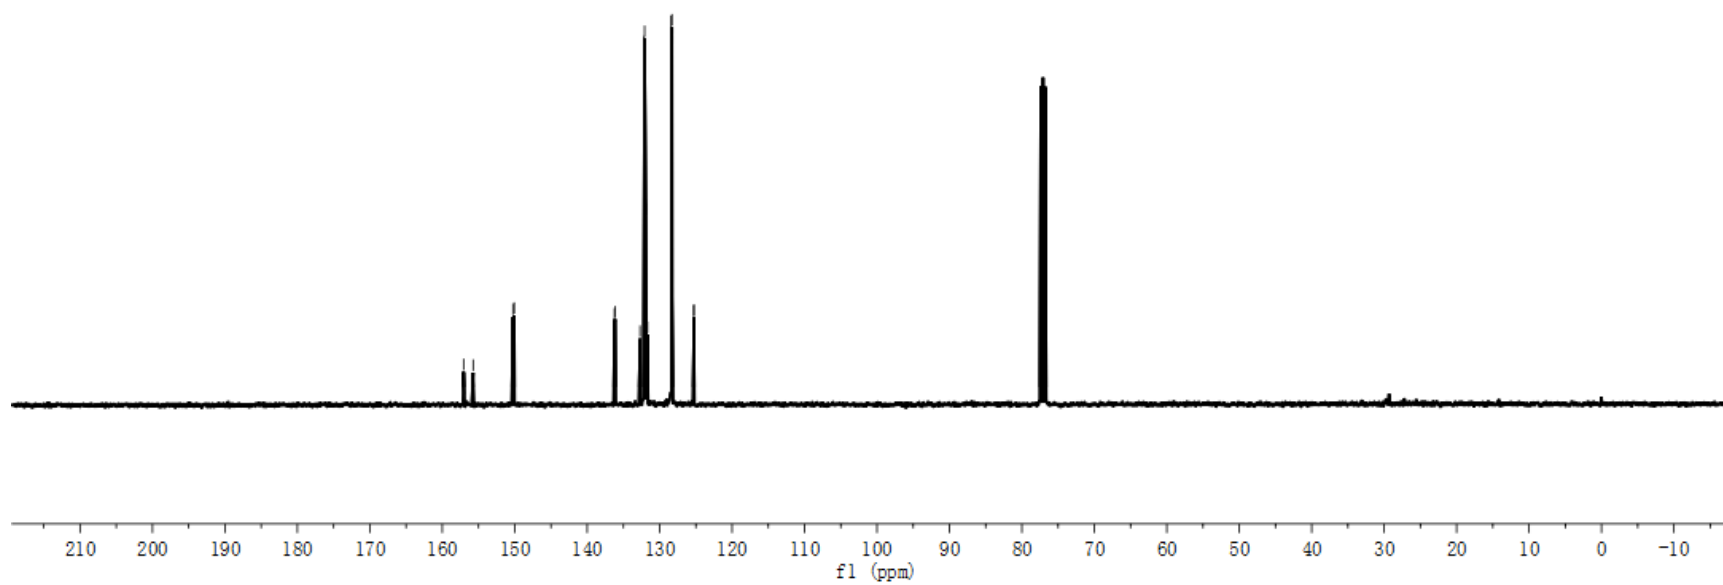

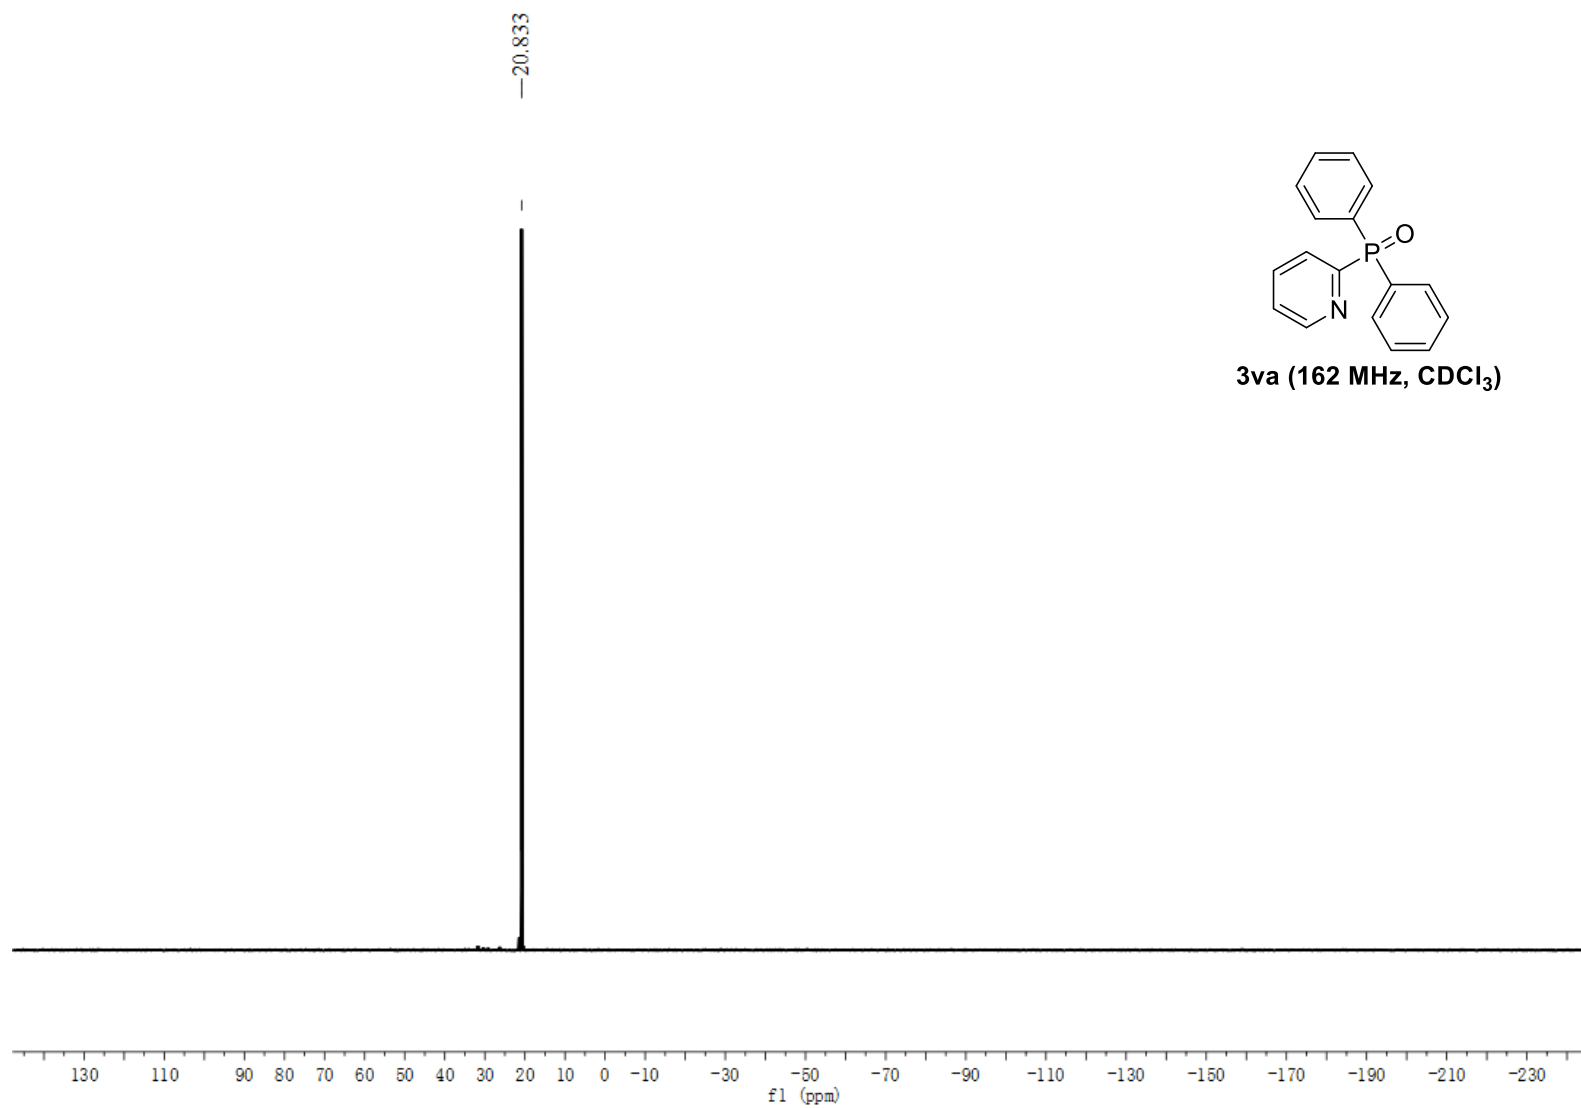

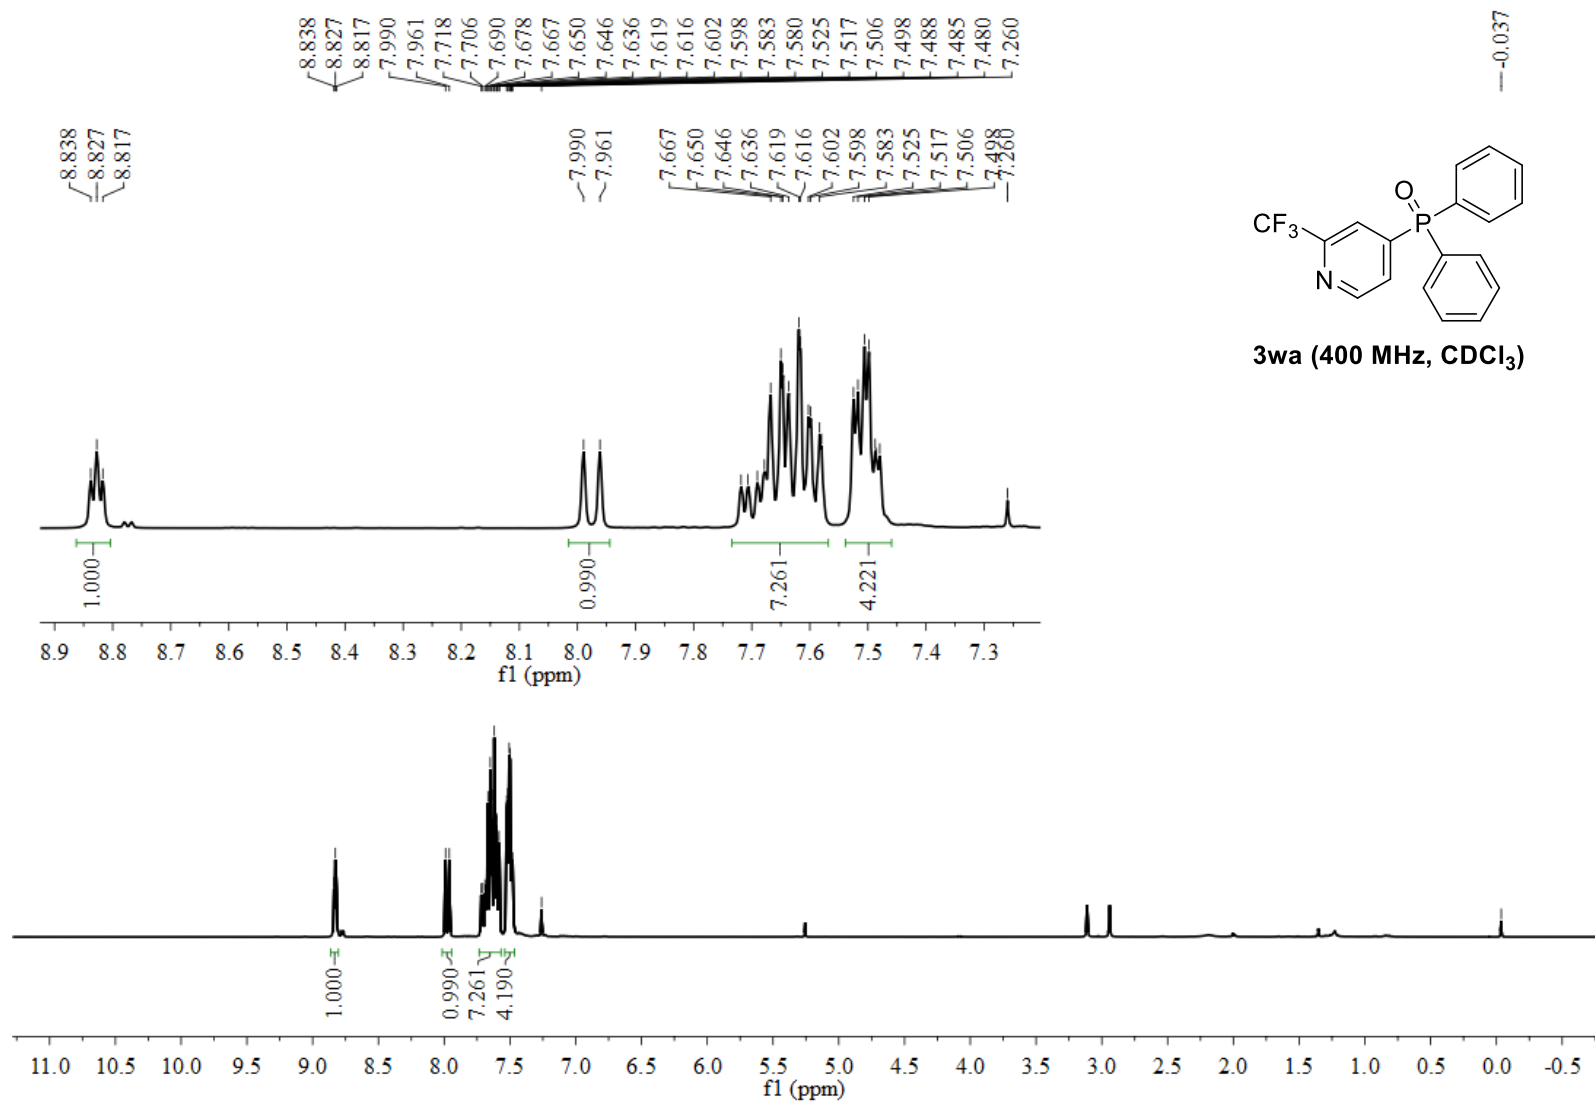

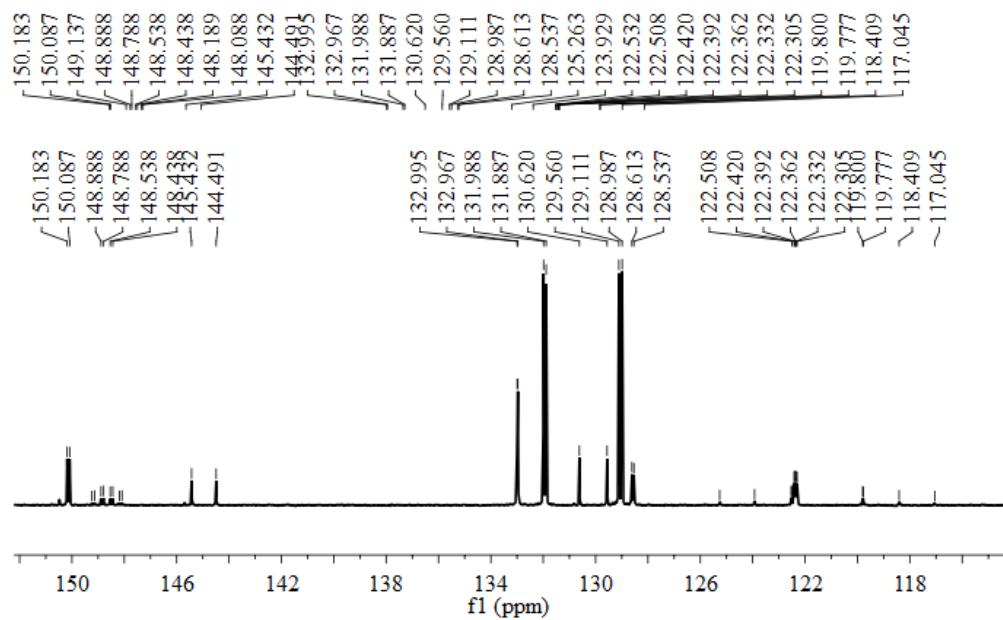

77.414  
77.096  
76.777

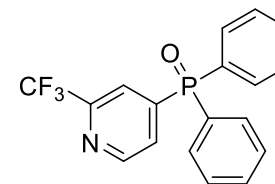

**3wa (101 MHz, CDCl<sub>3</sub>)**

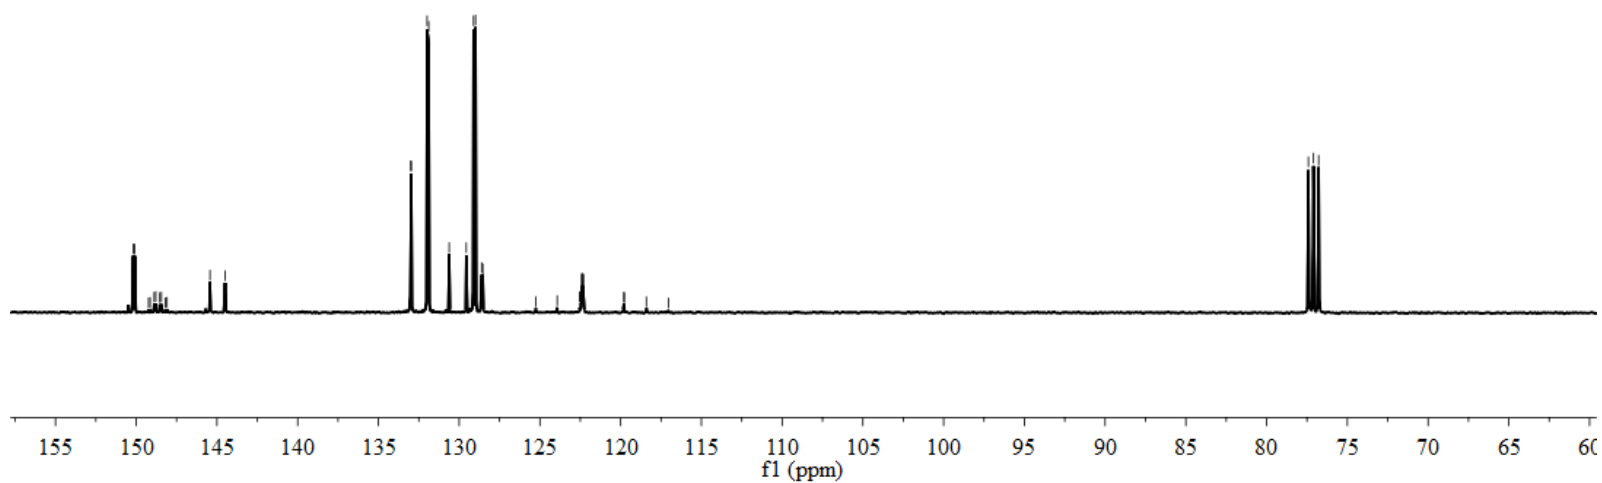

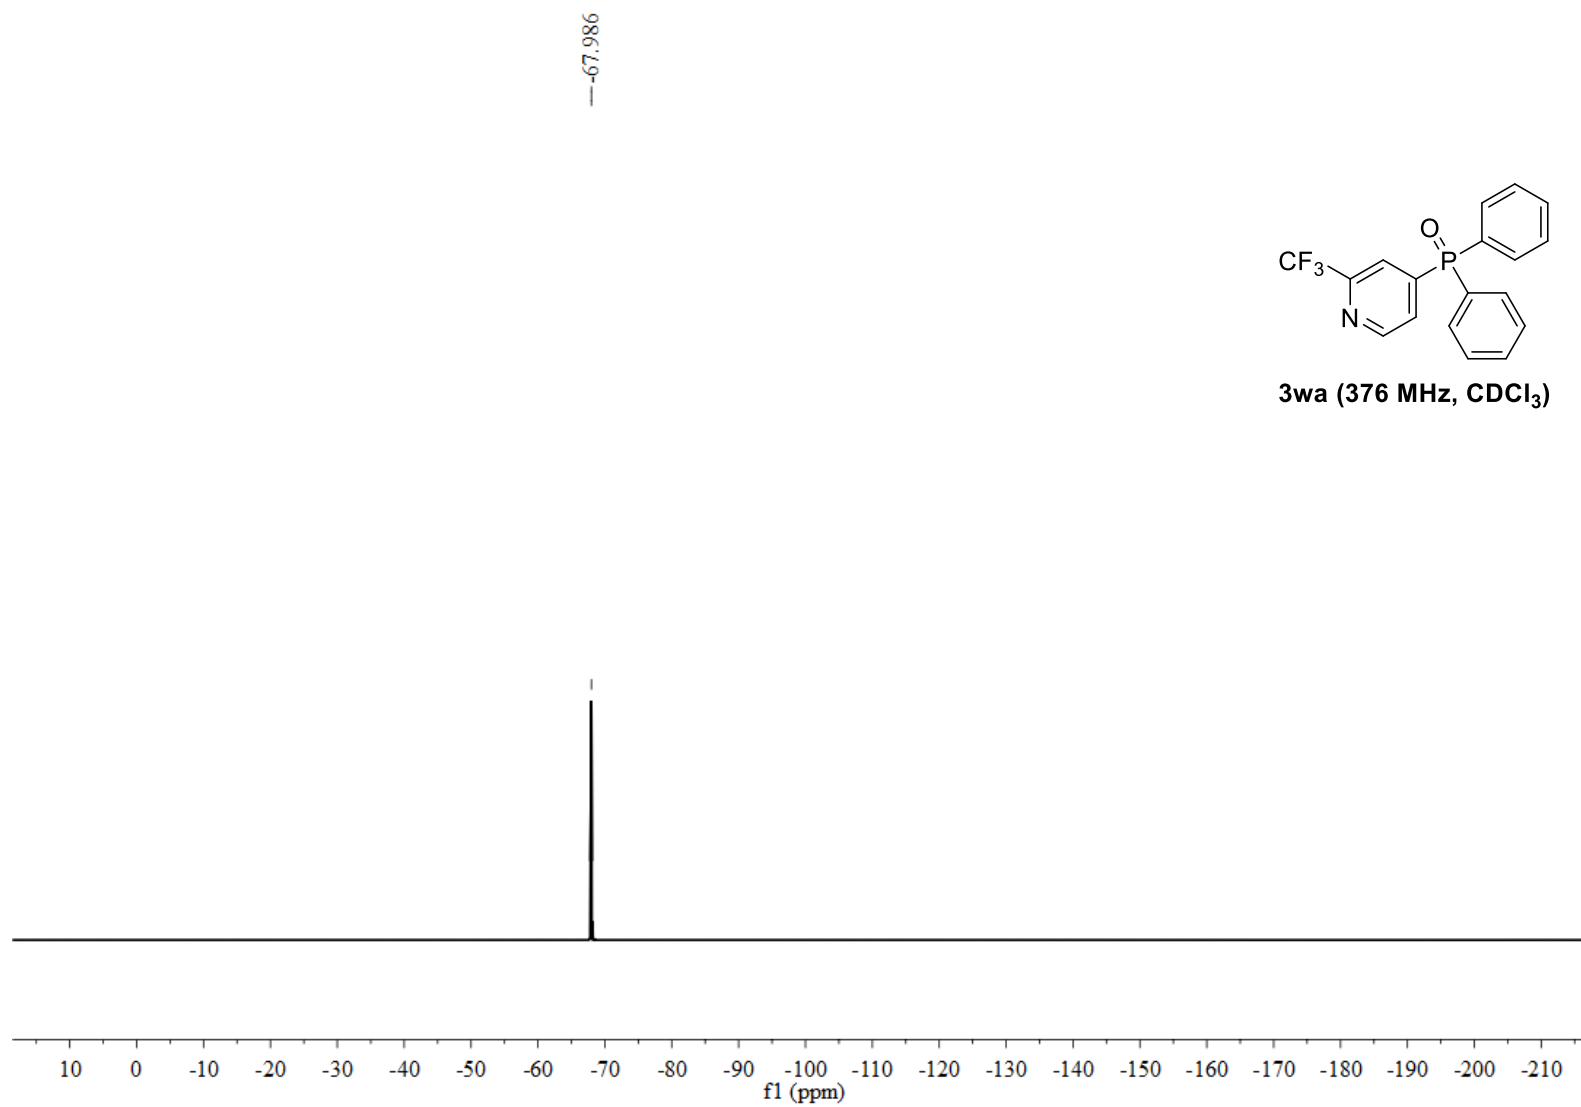



—26.080

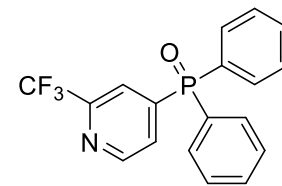

**3wa (162 MHz, CDCl<sub>3</sub>)**

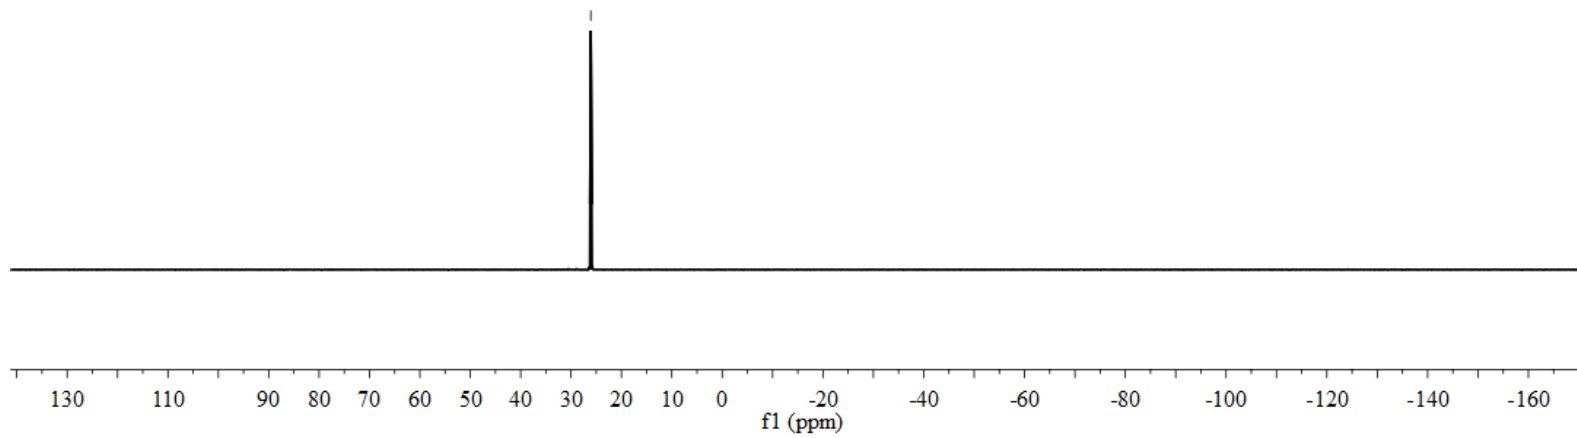

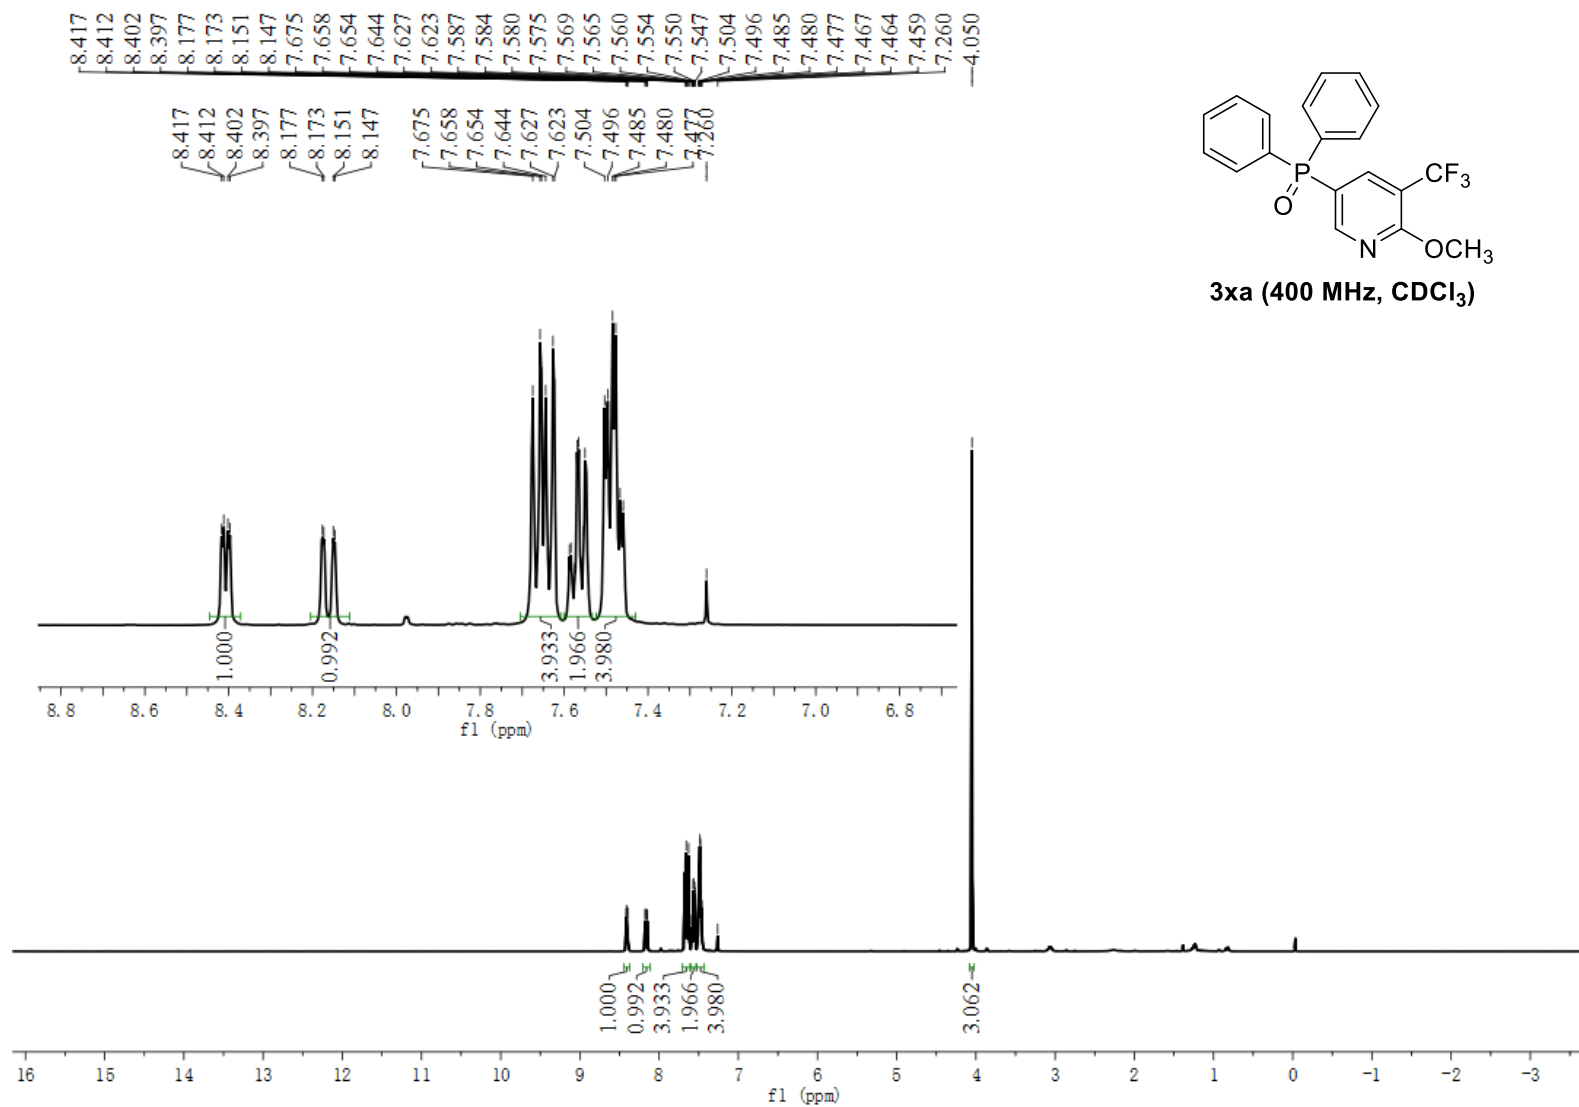

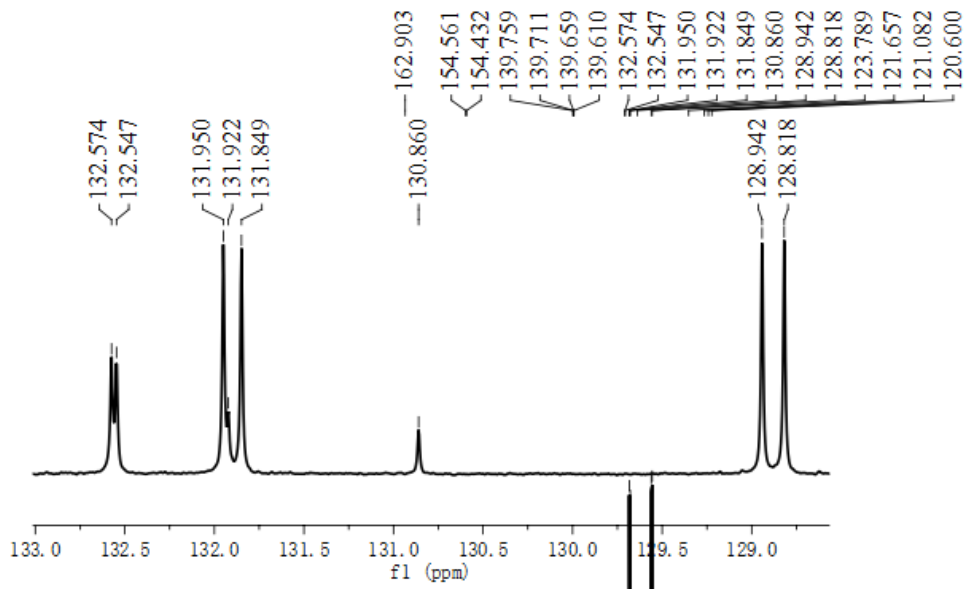

—54.749

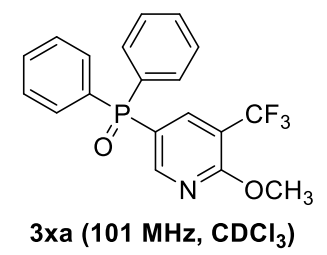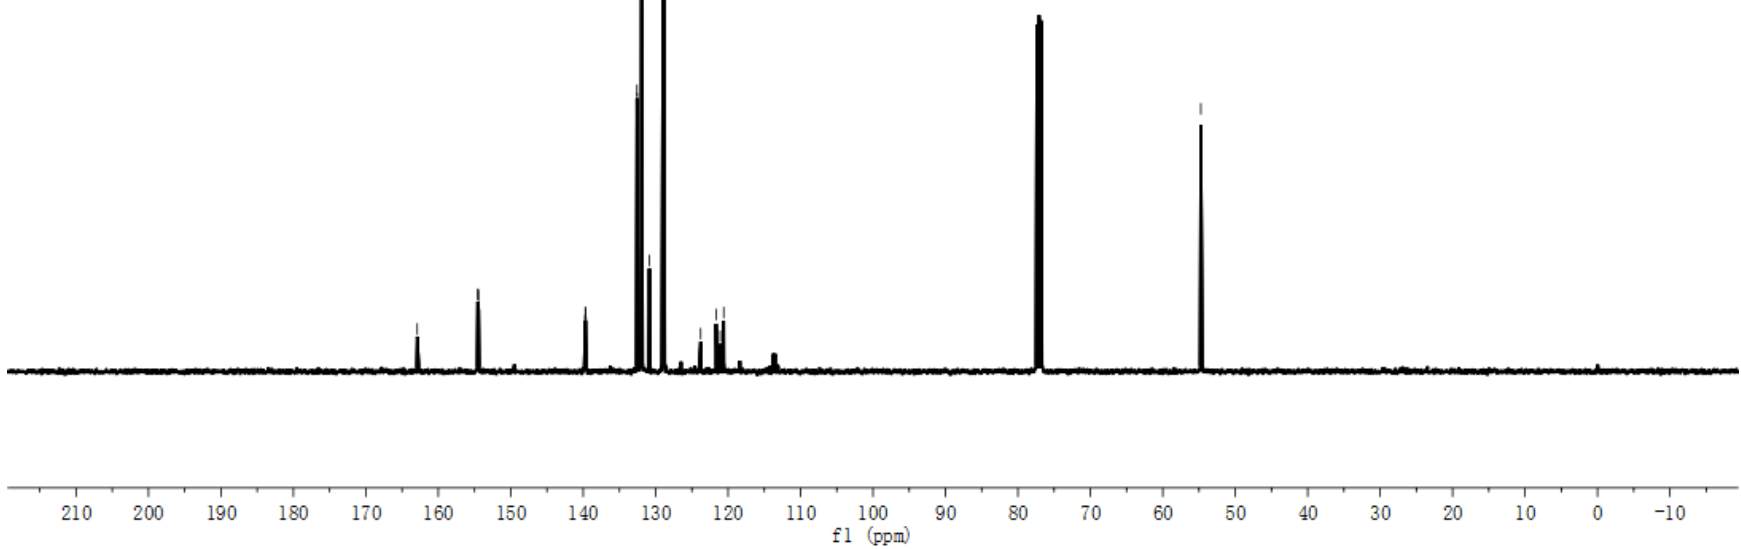

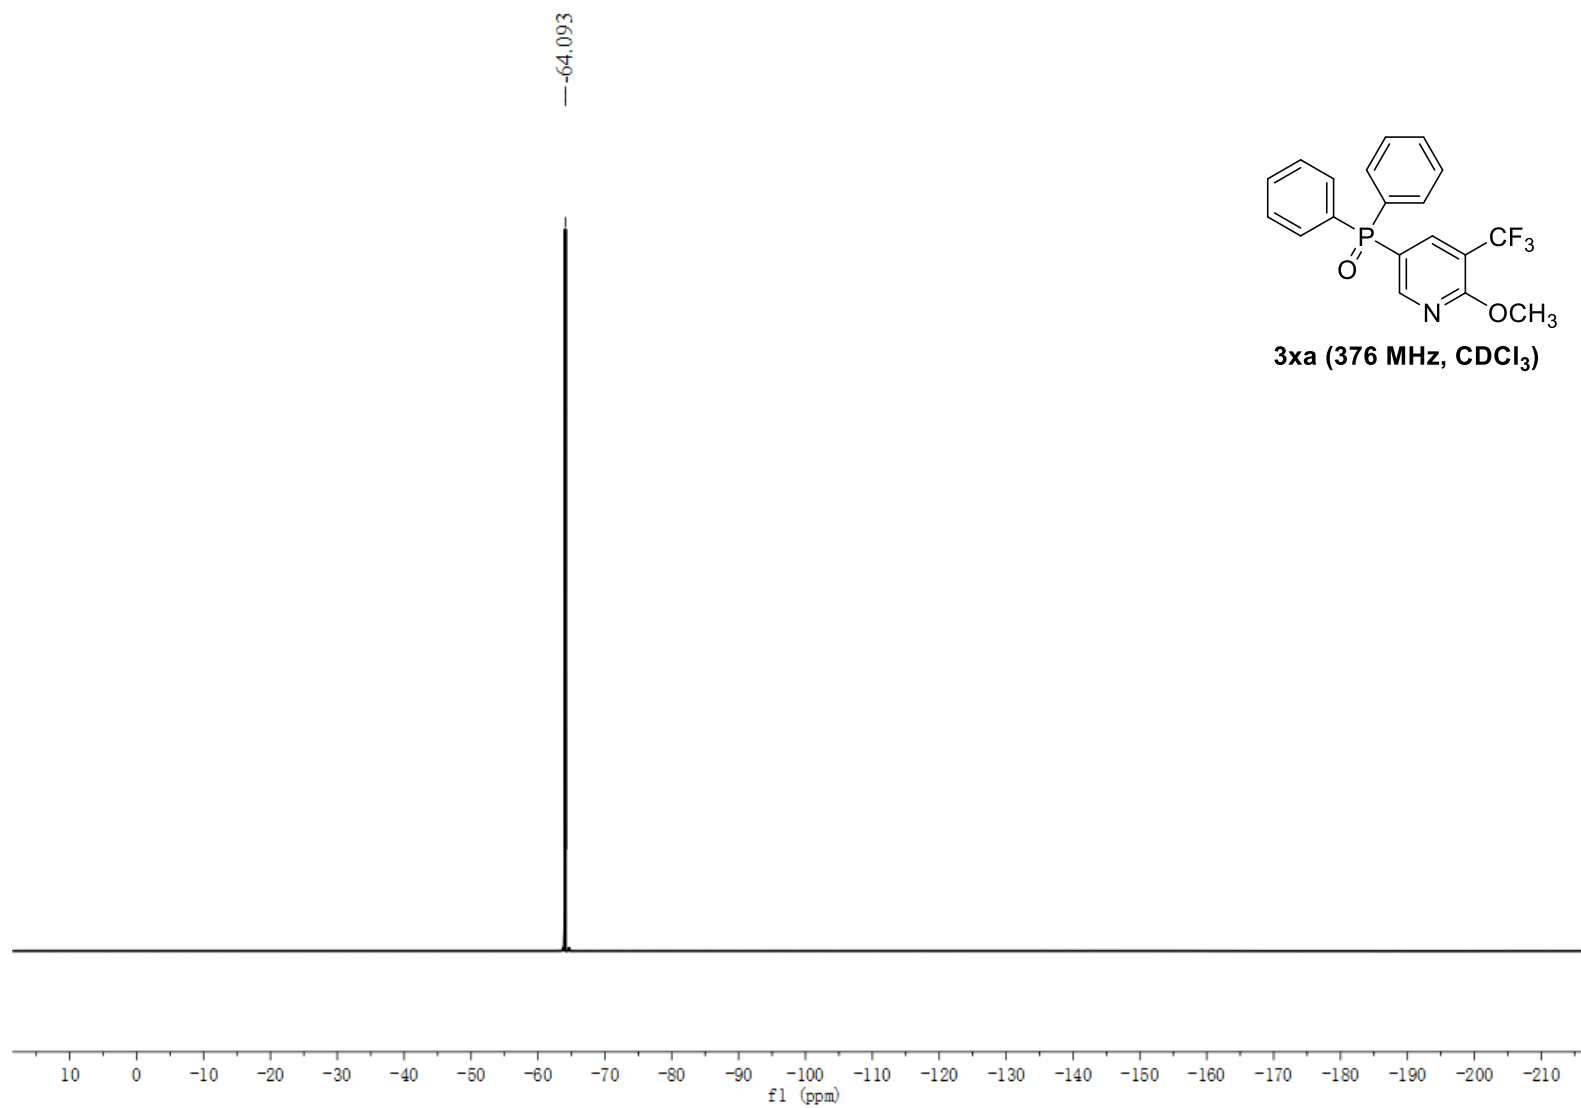

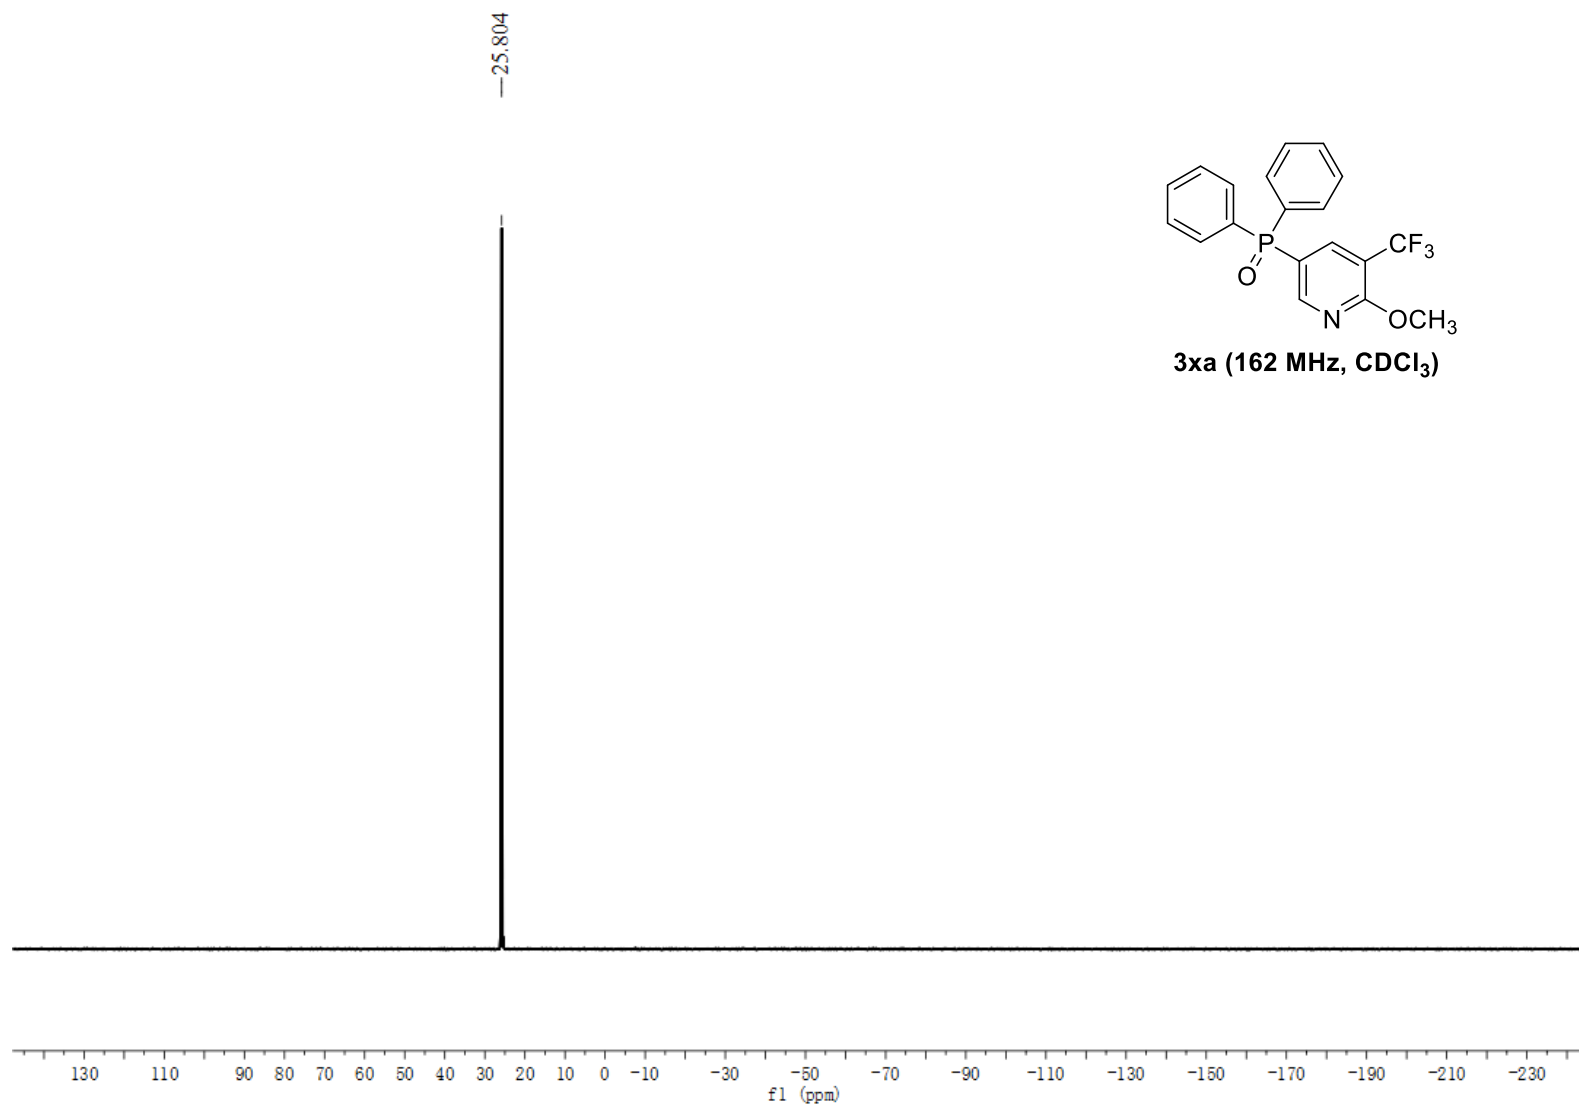

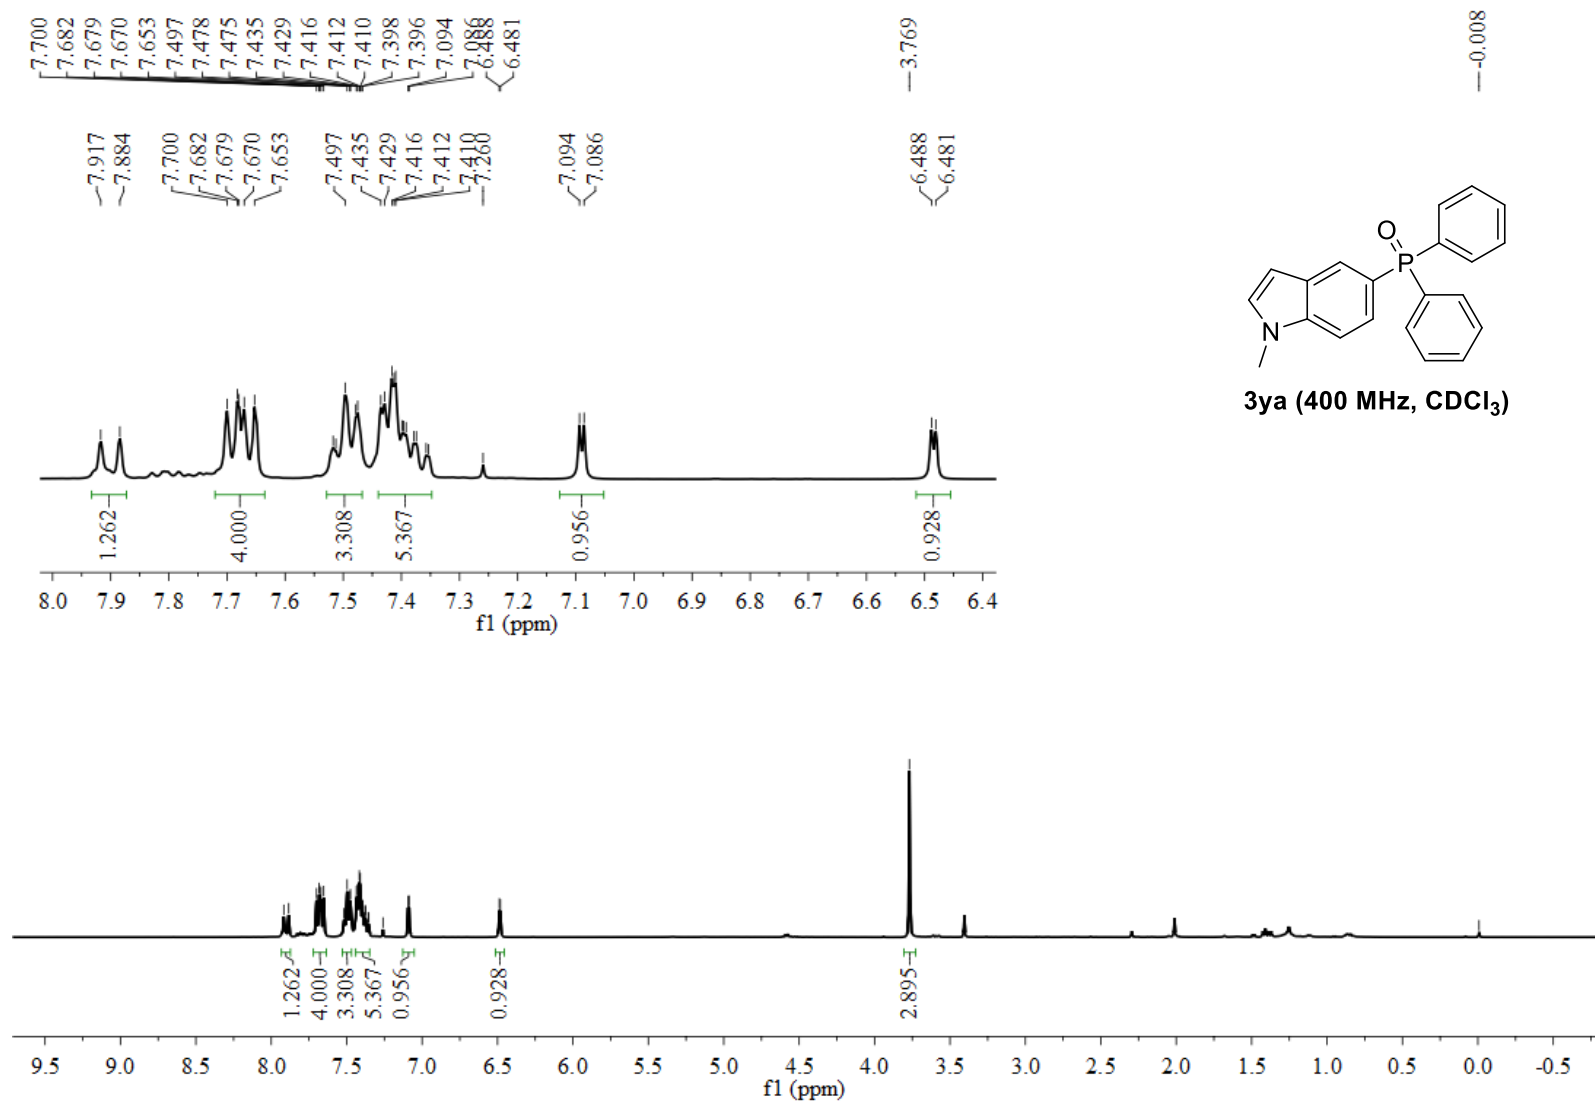

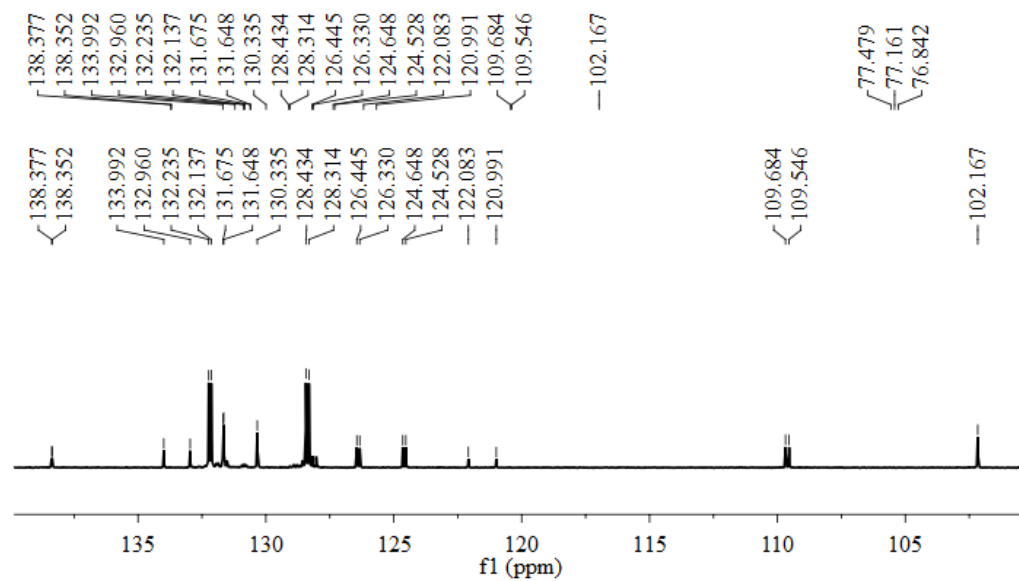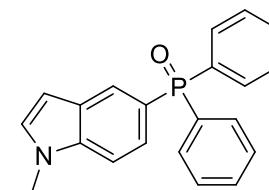

**3ya** (101 MHz, CDCl<sub>3</sub>)

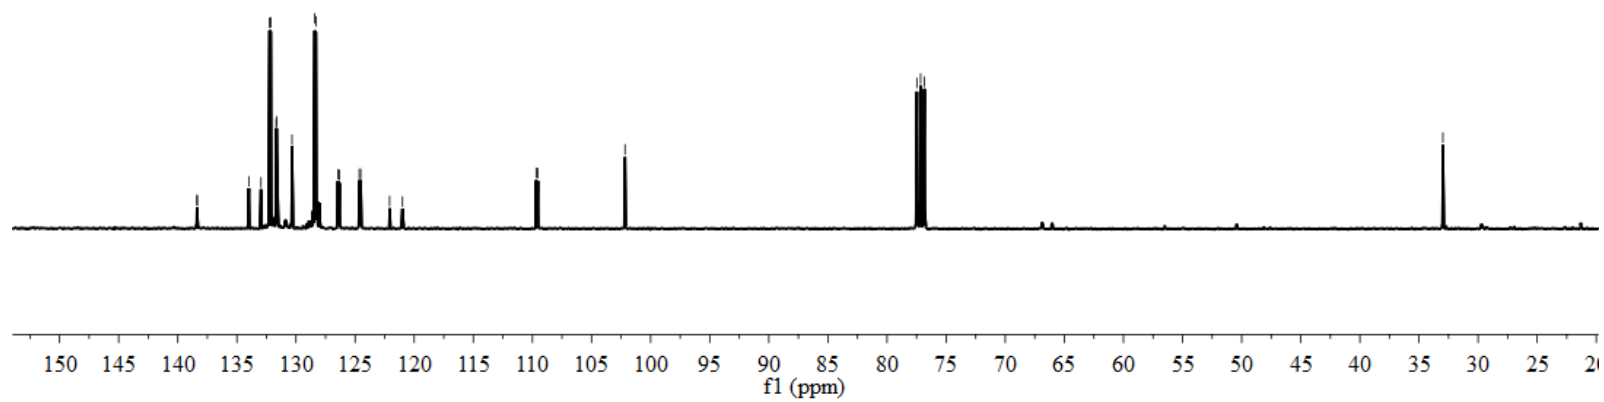

—31.427

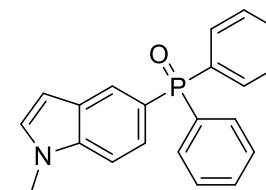

**3ya (162 MHz, CDCl<sub>3</sub>)**

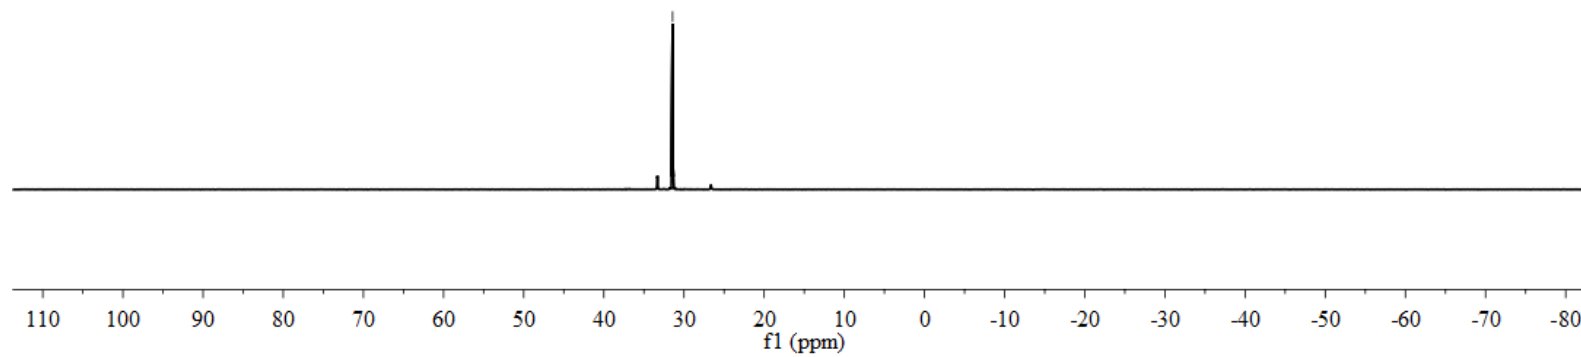



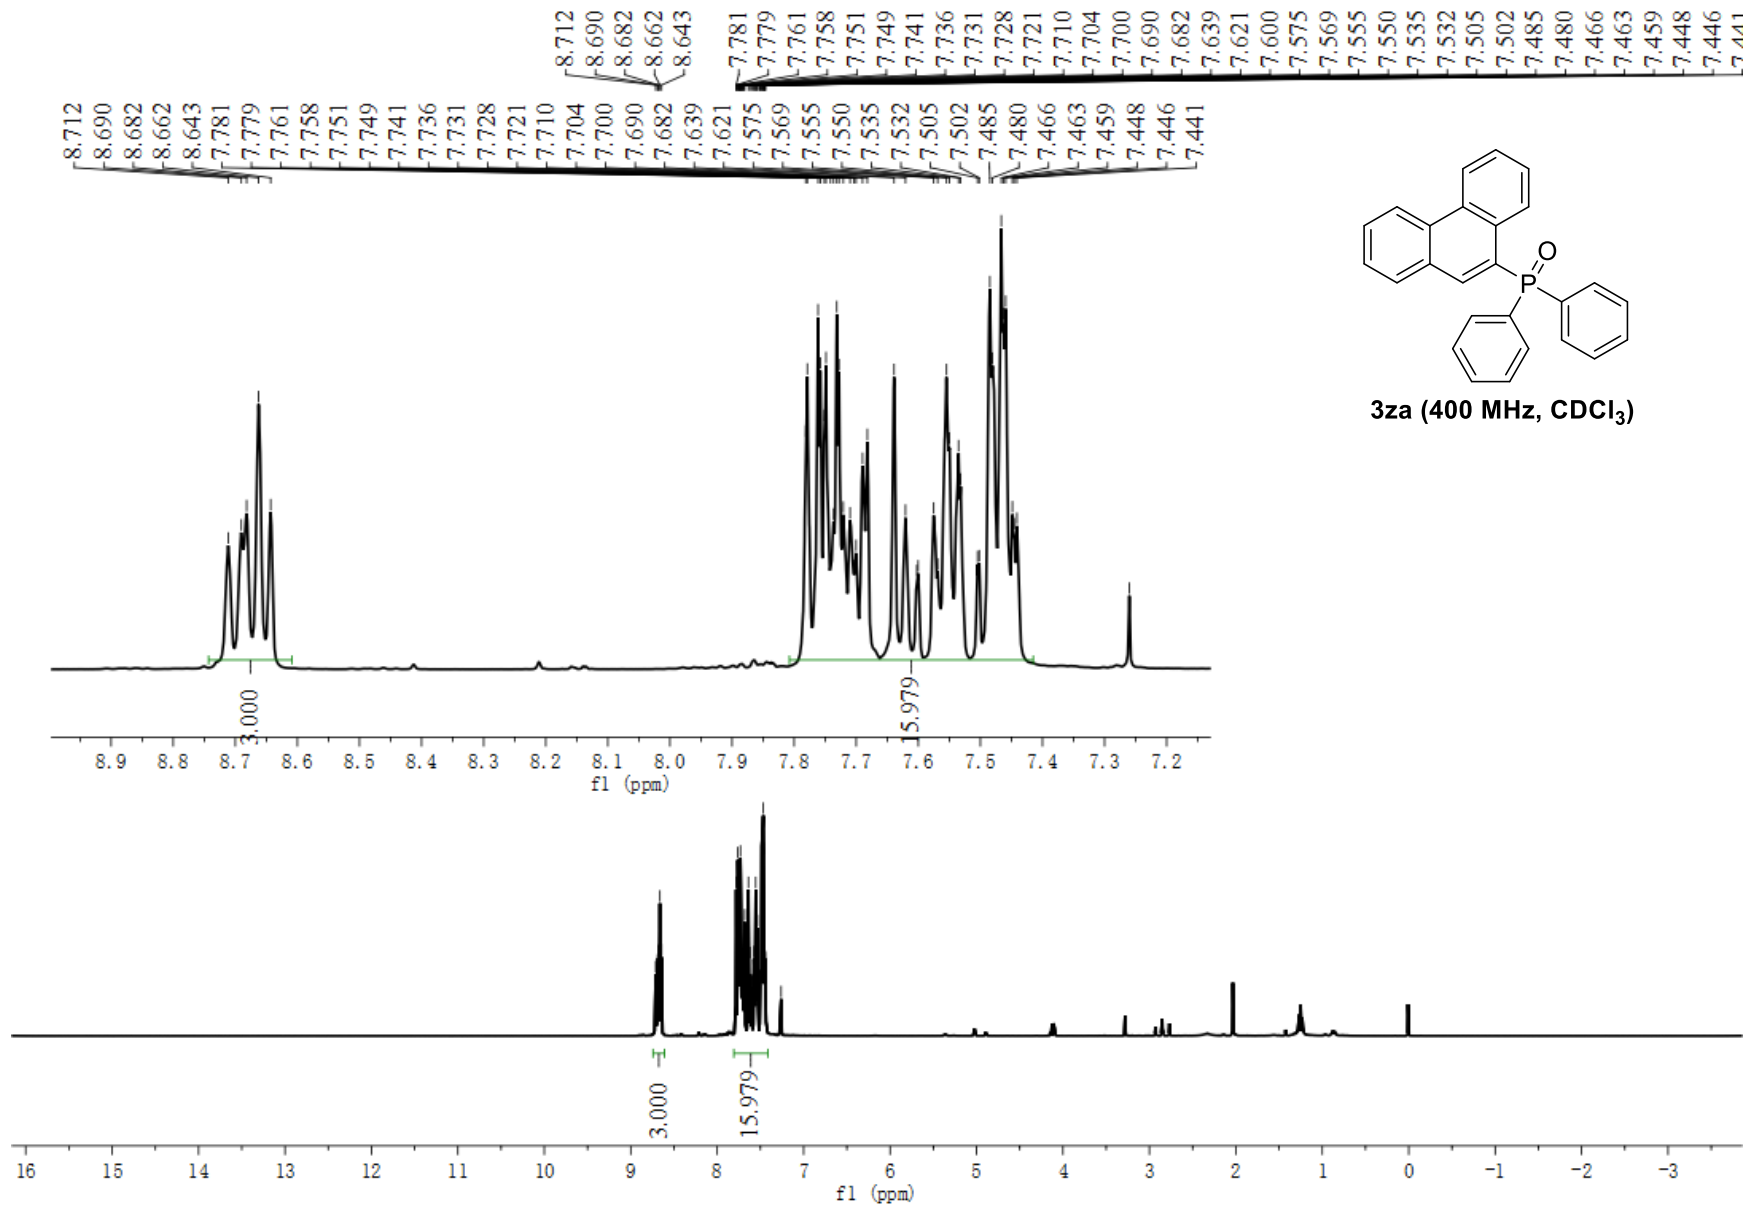

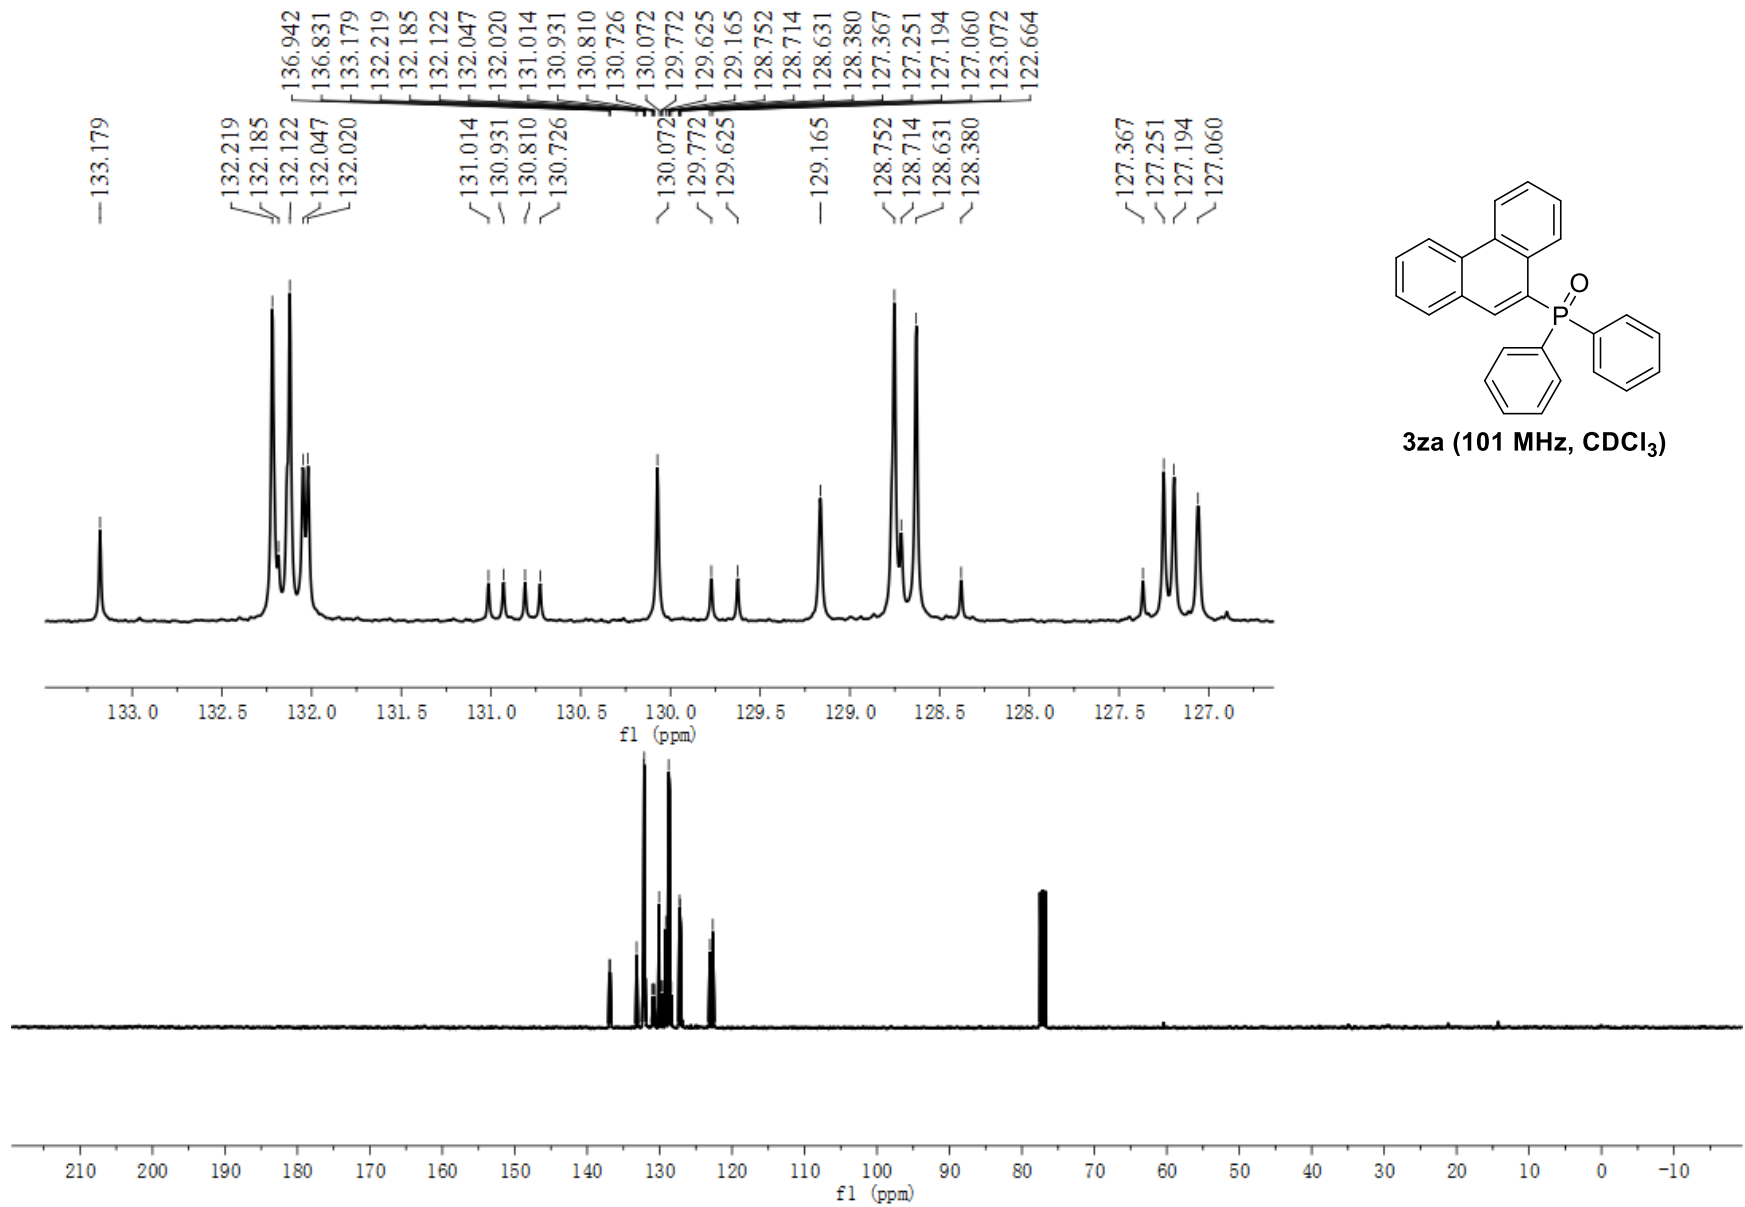

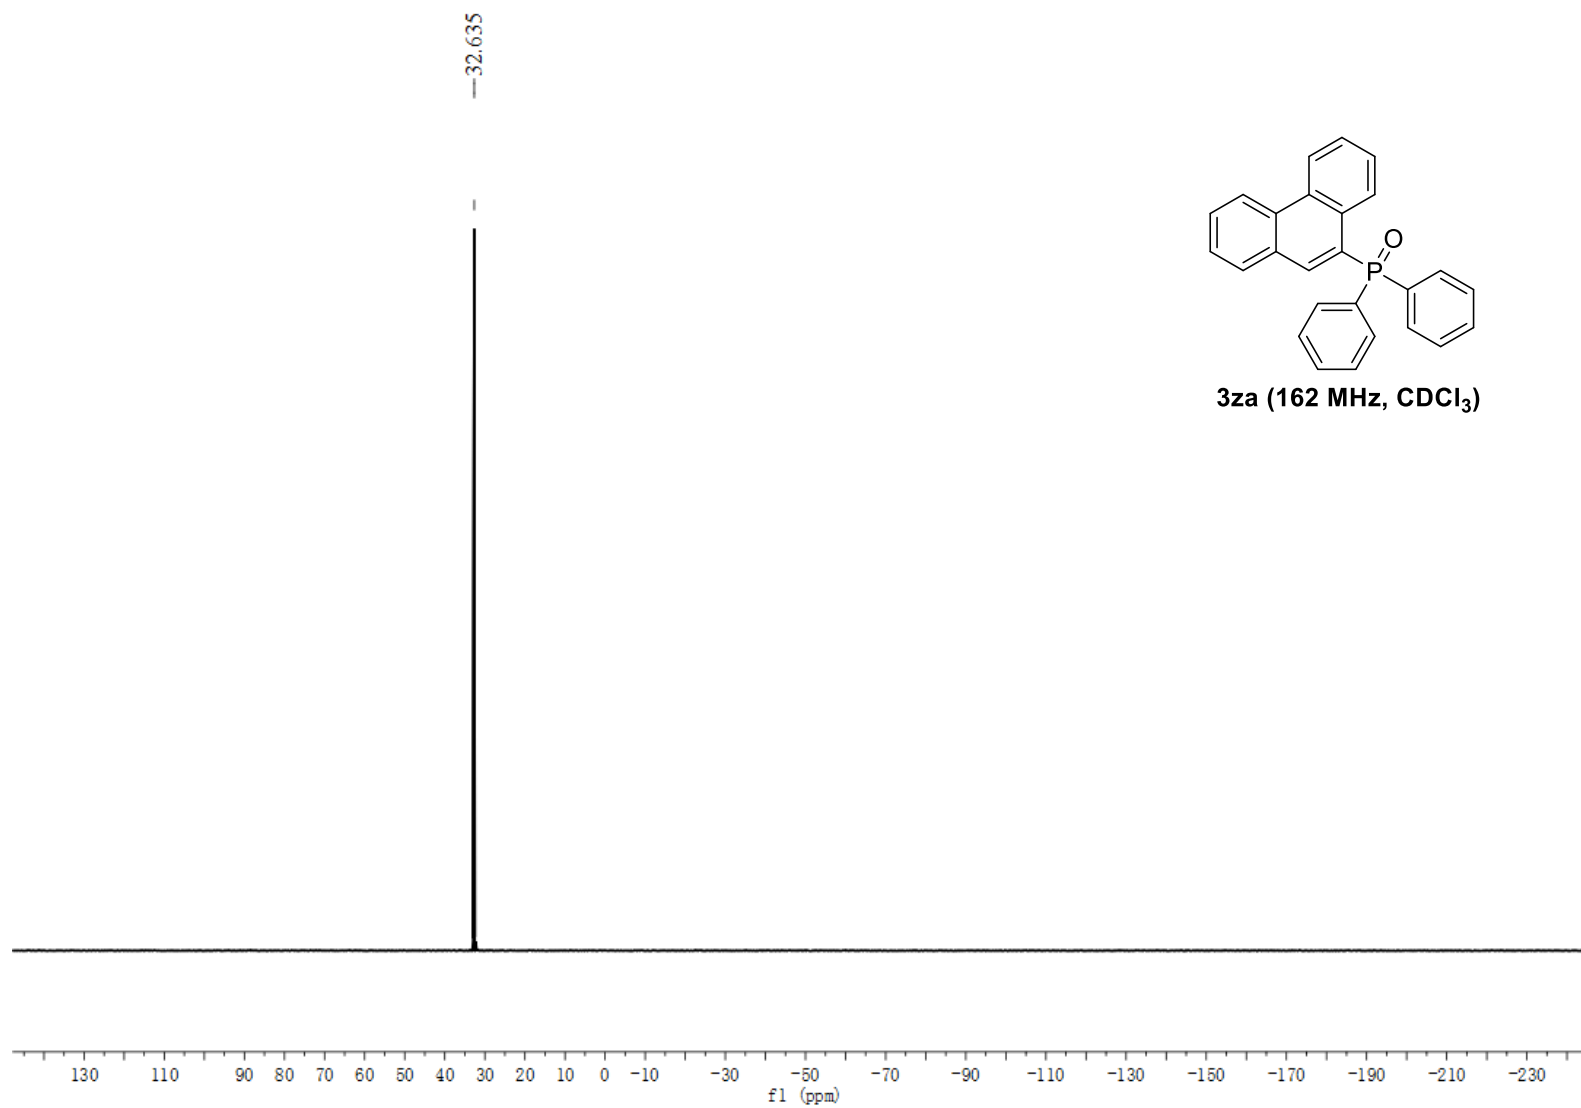

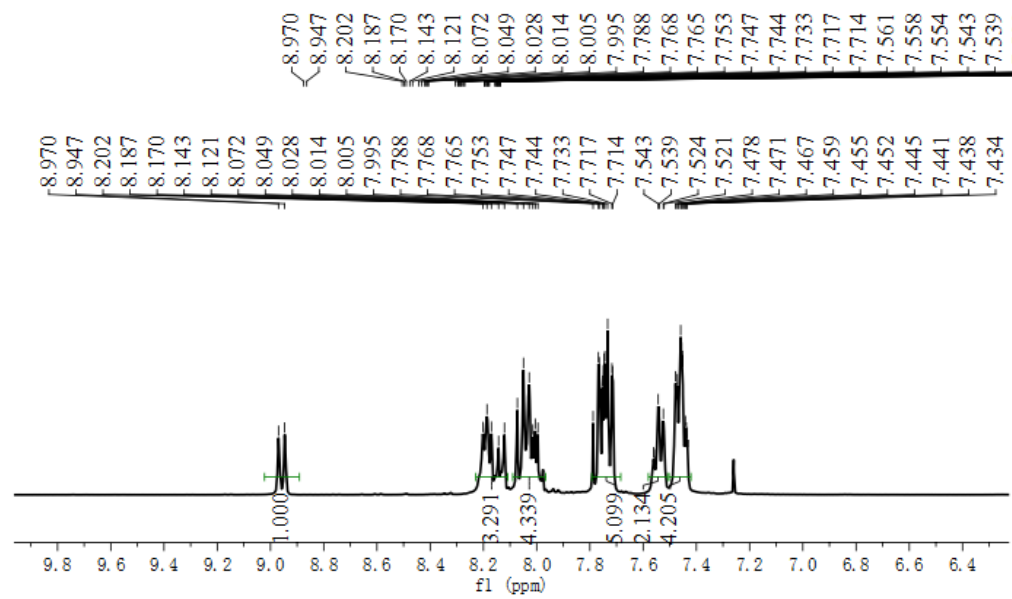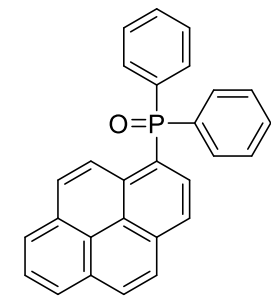

**3b (400 MHz, CDCl<sub>3</sub>)**

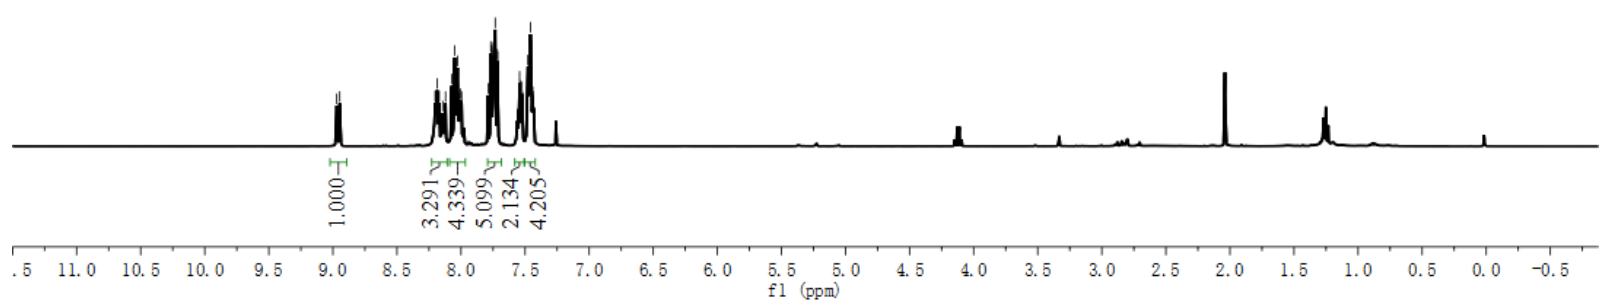

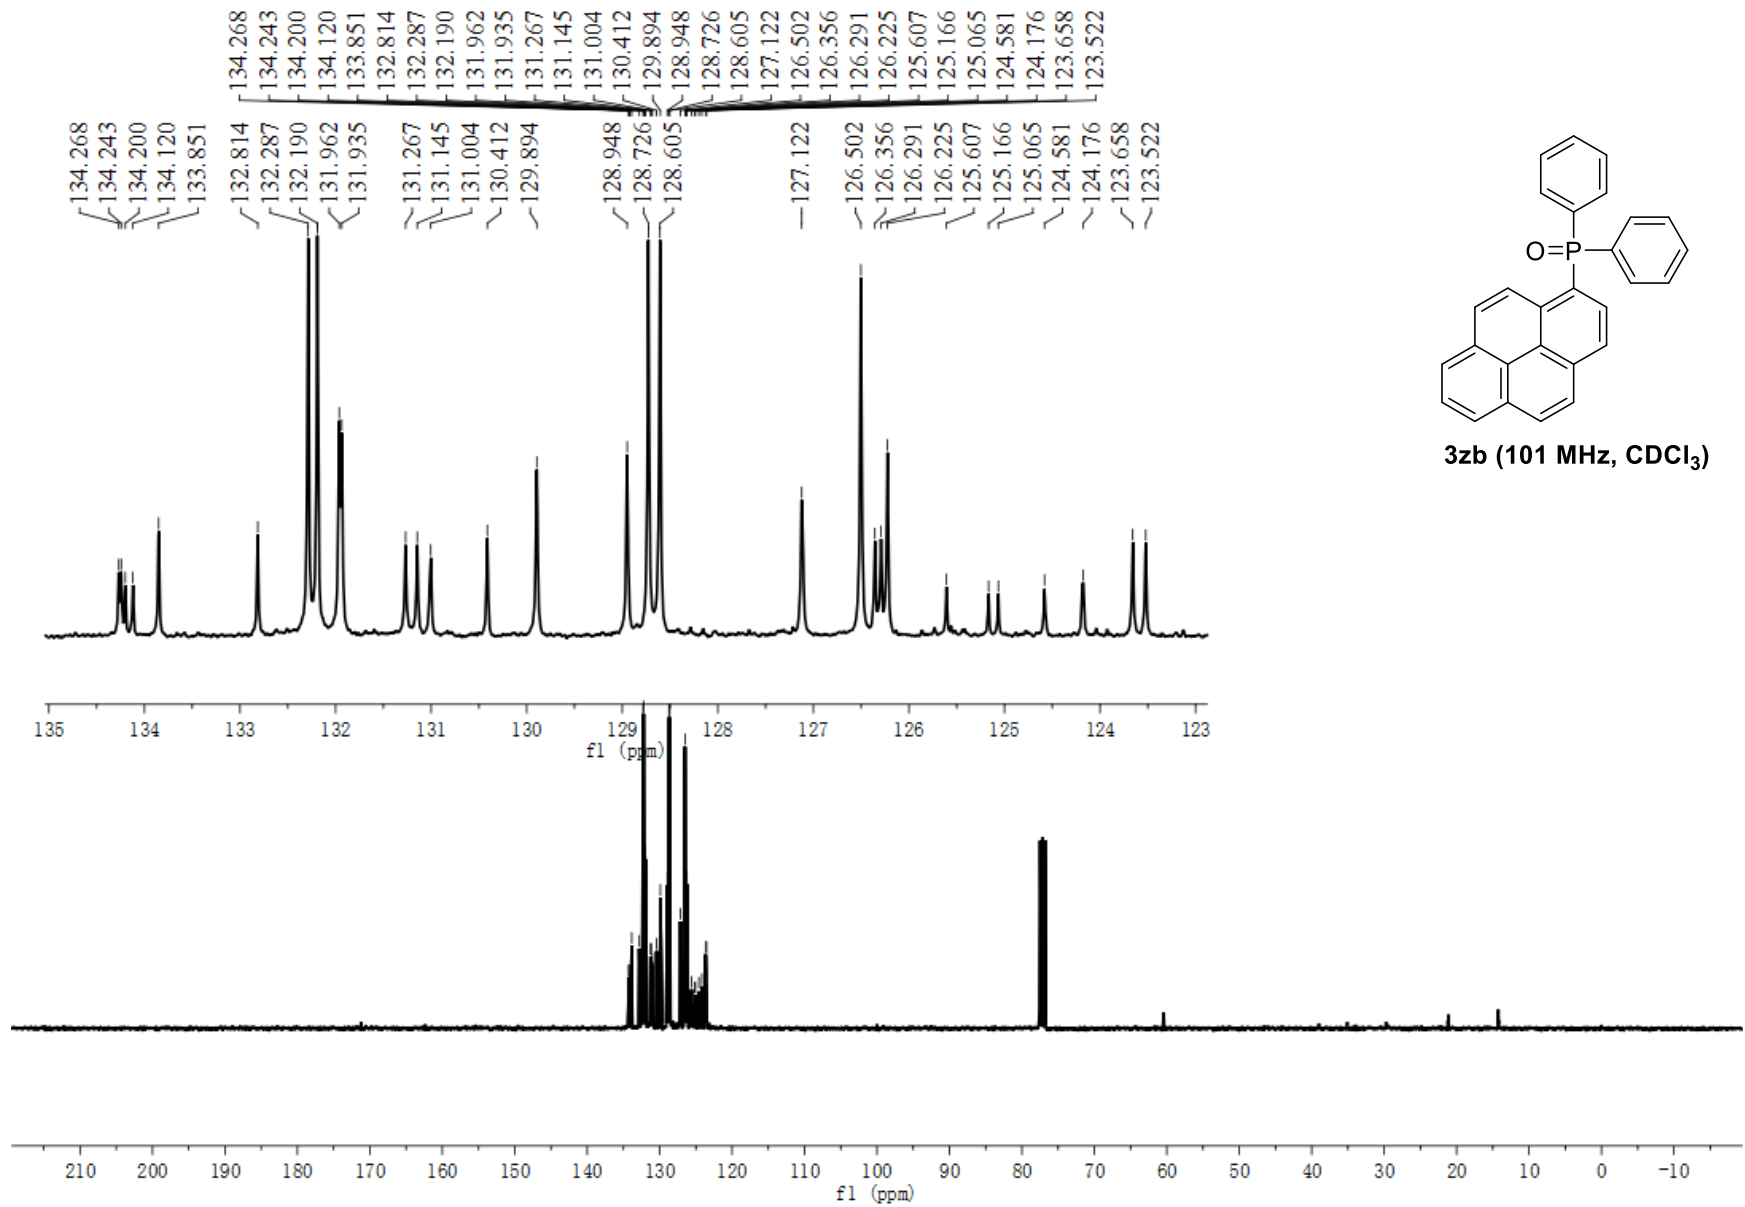

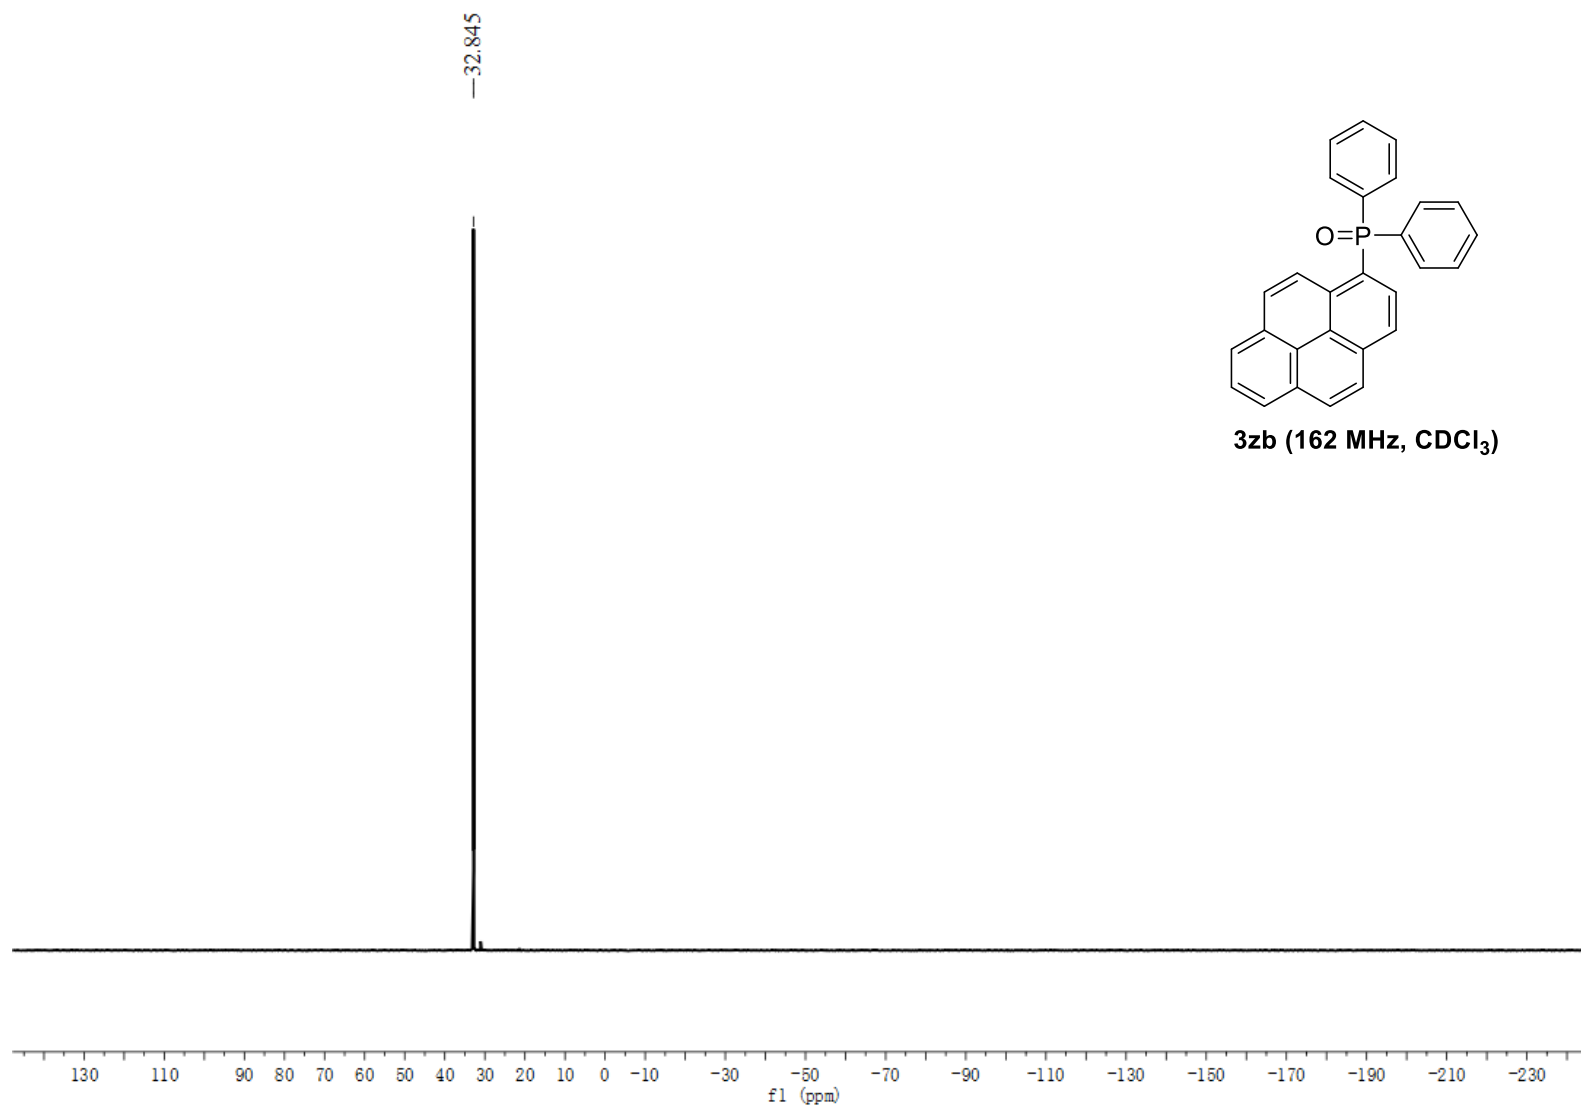

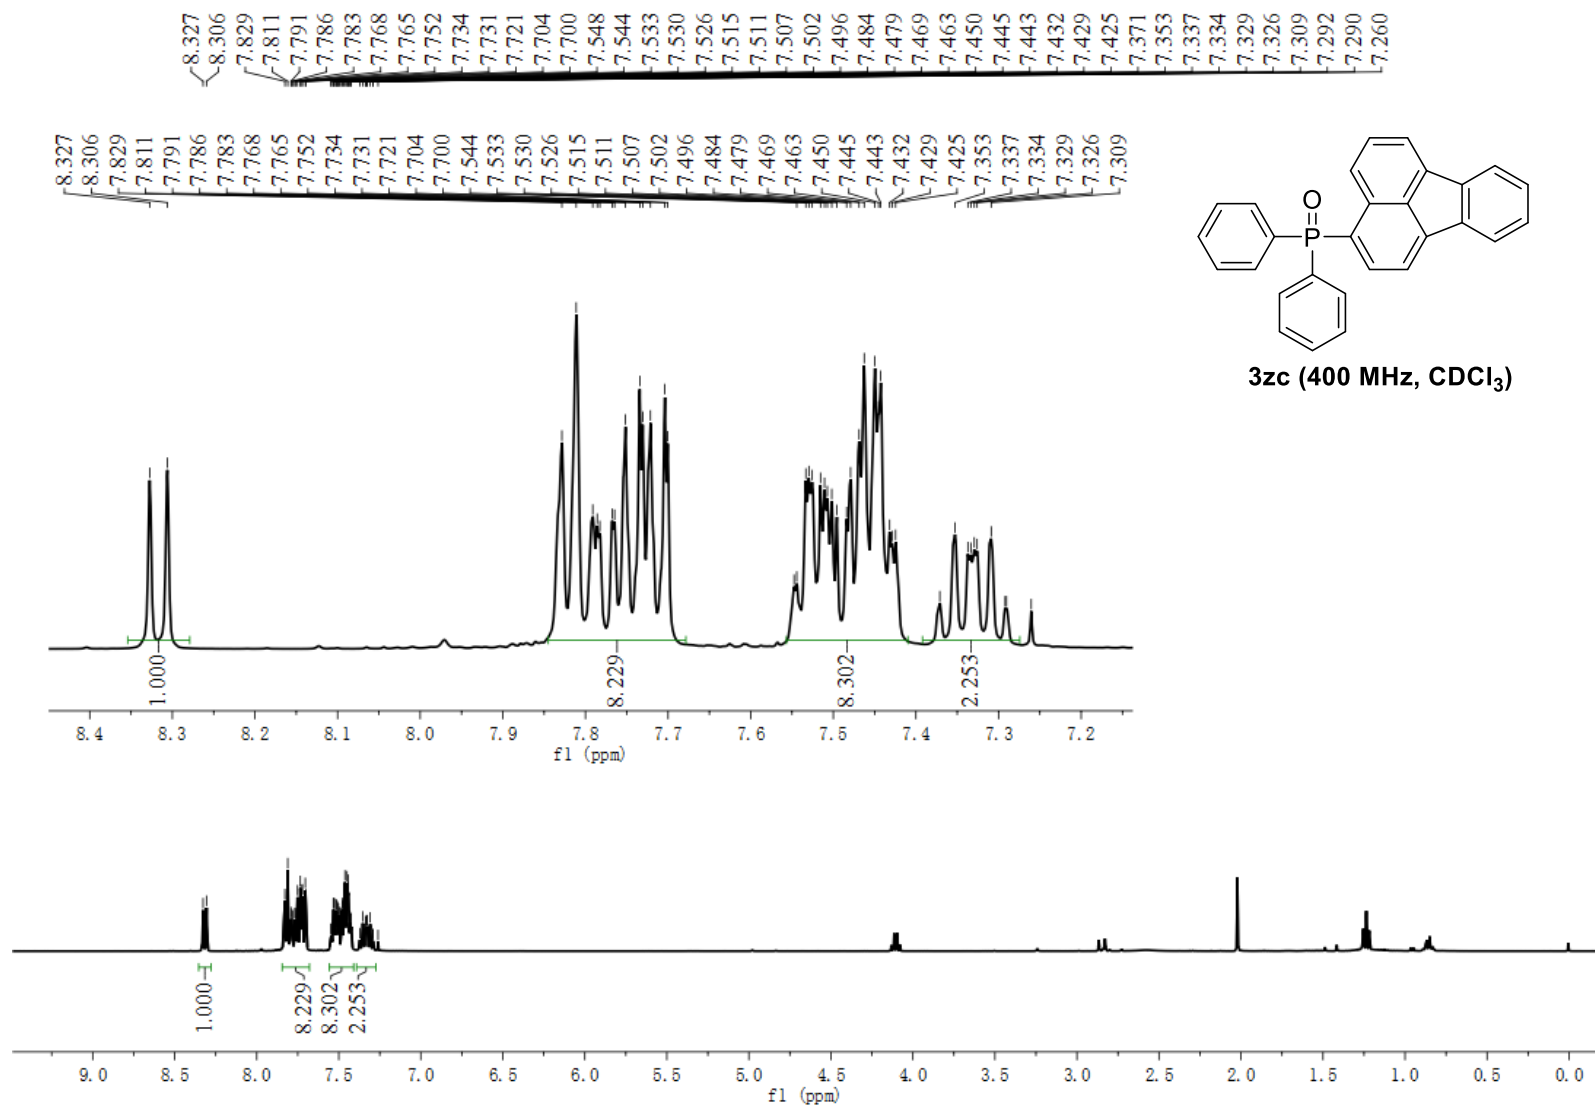

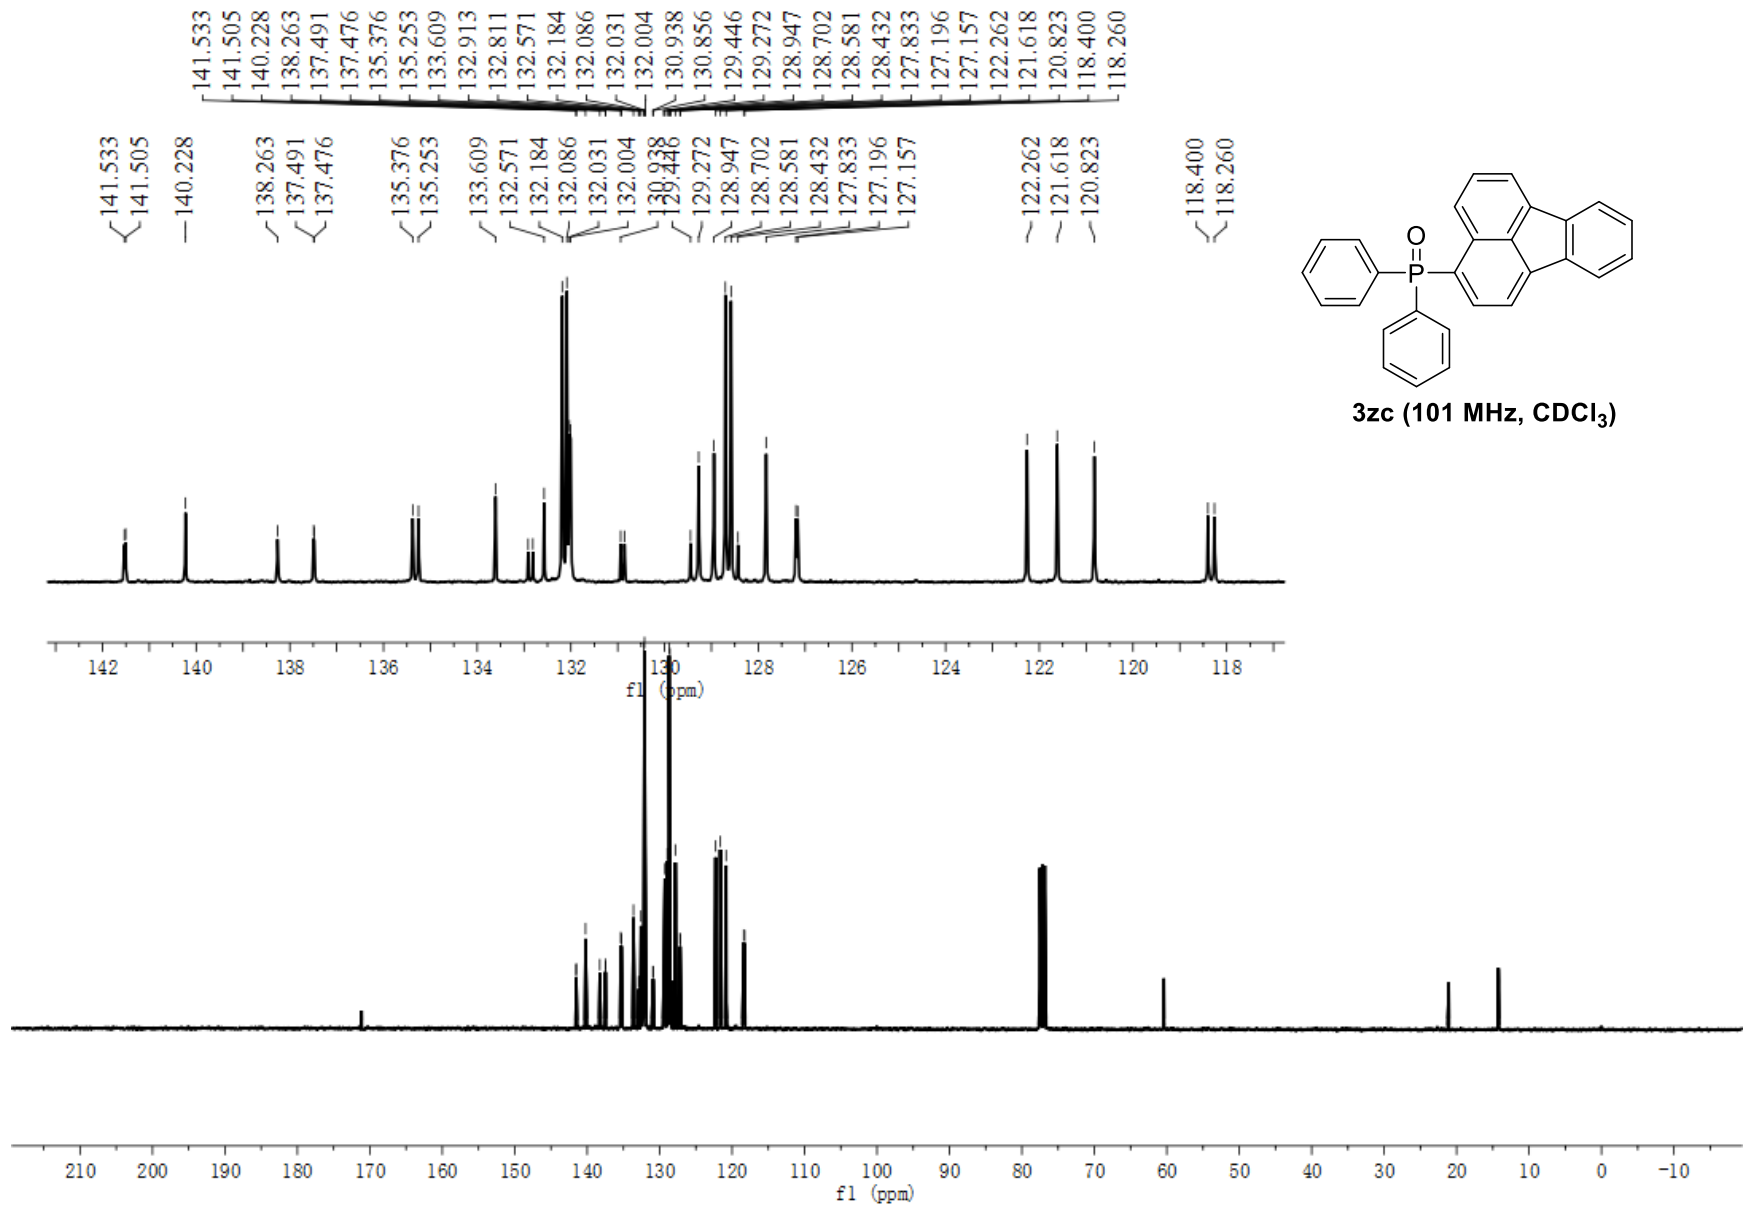



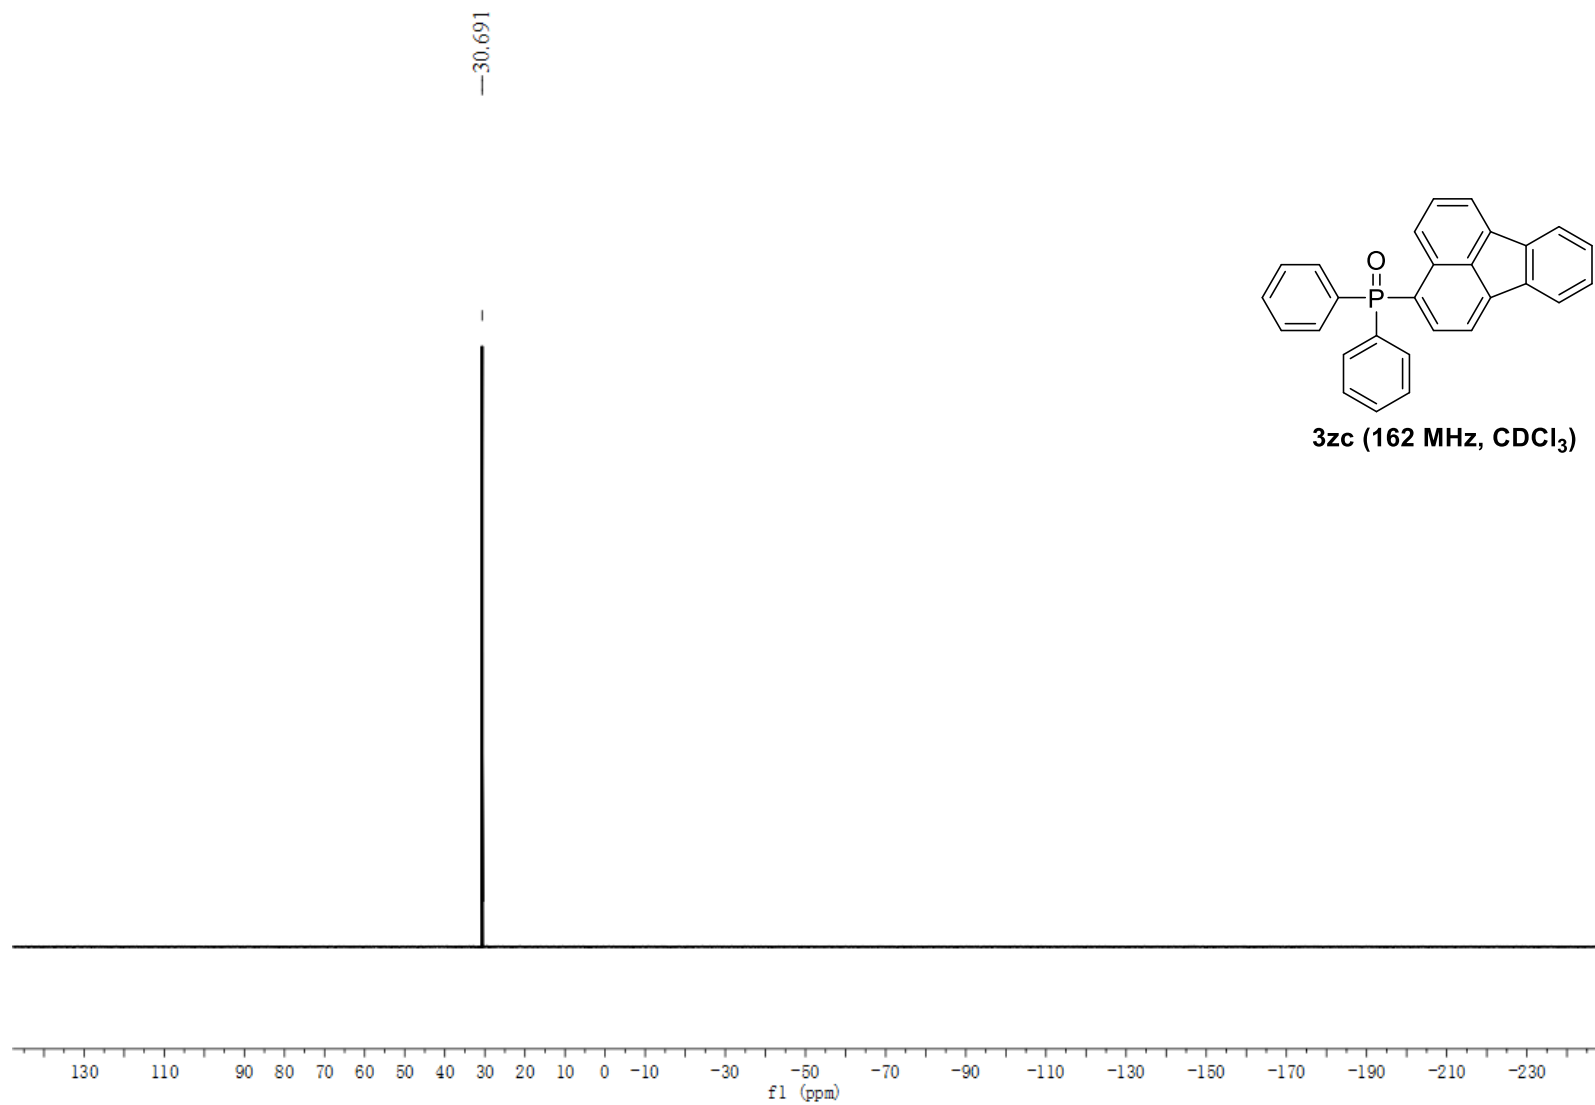

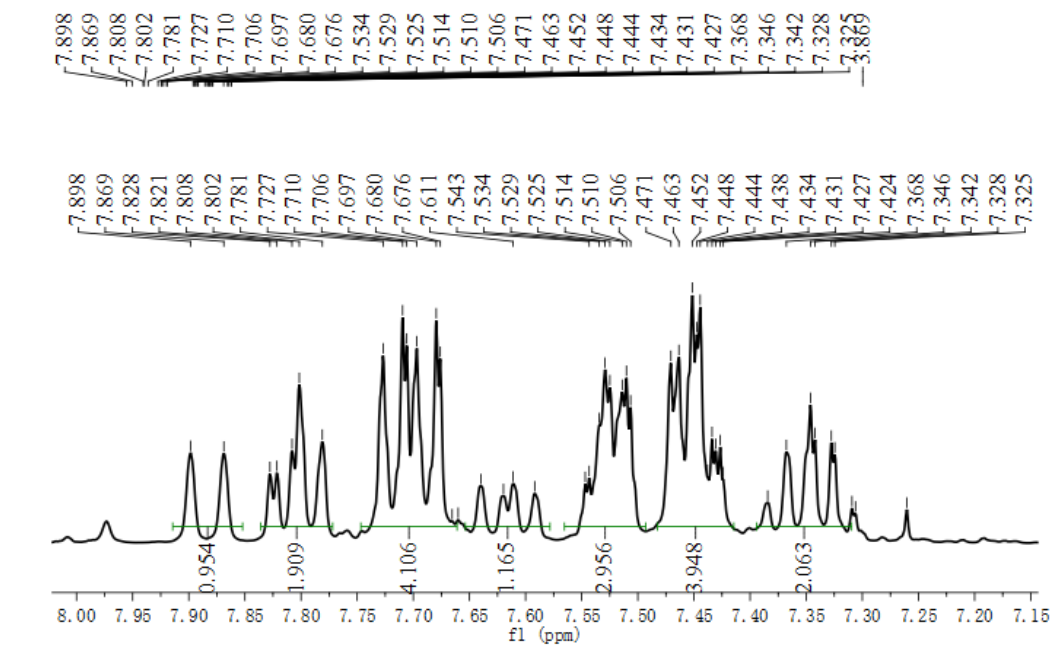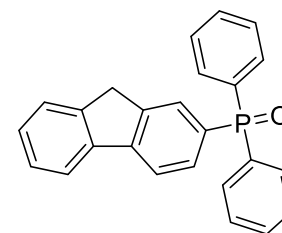

**3d (400 MHz, CDCl<sub>3</sub>)**

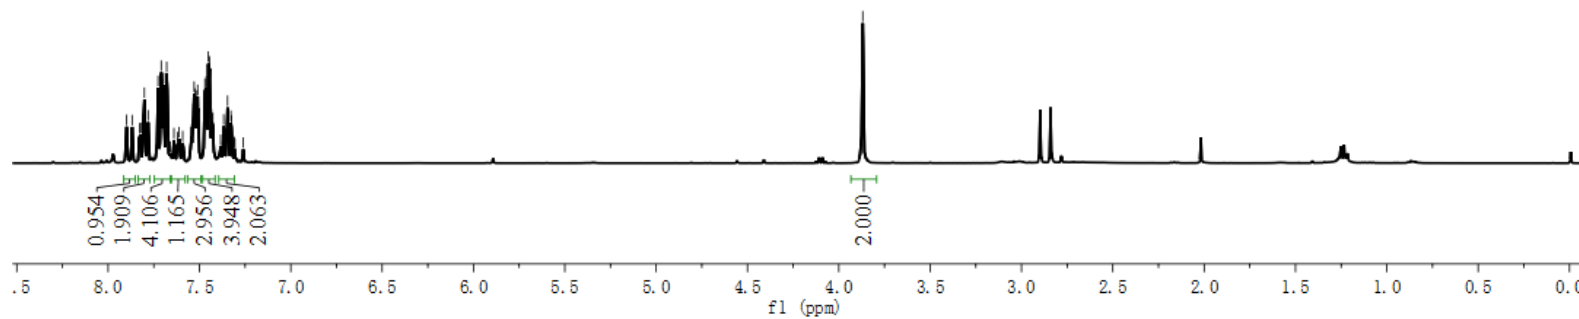

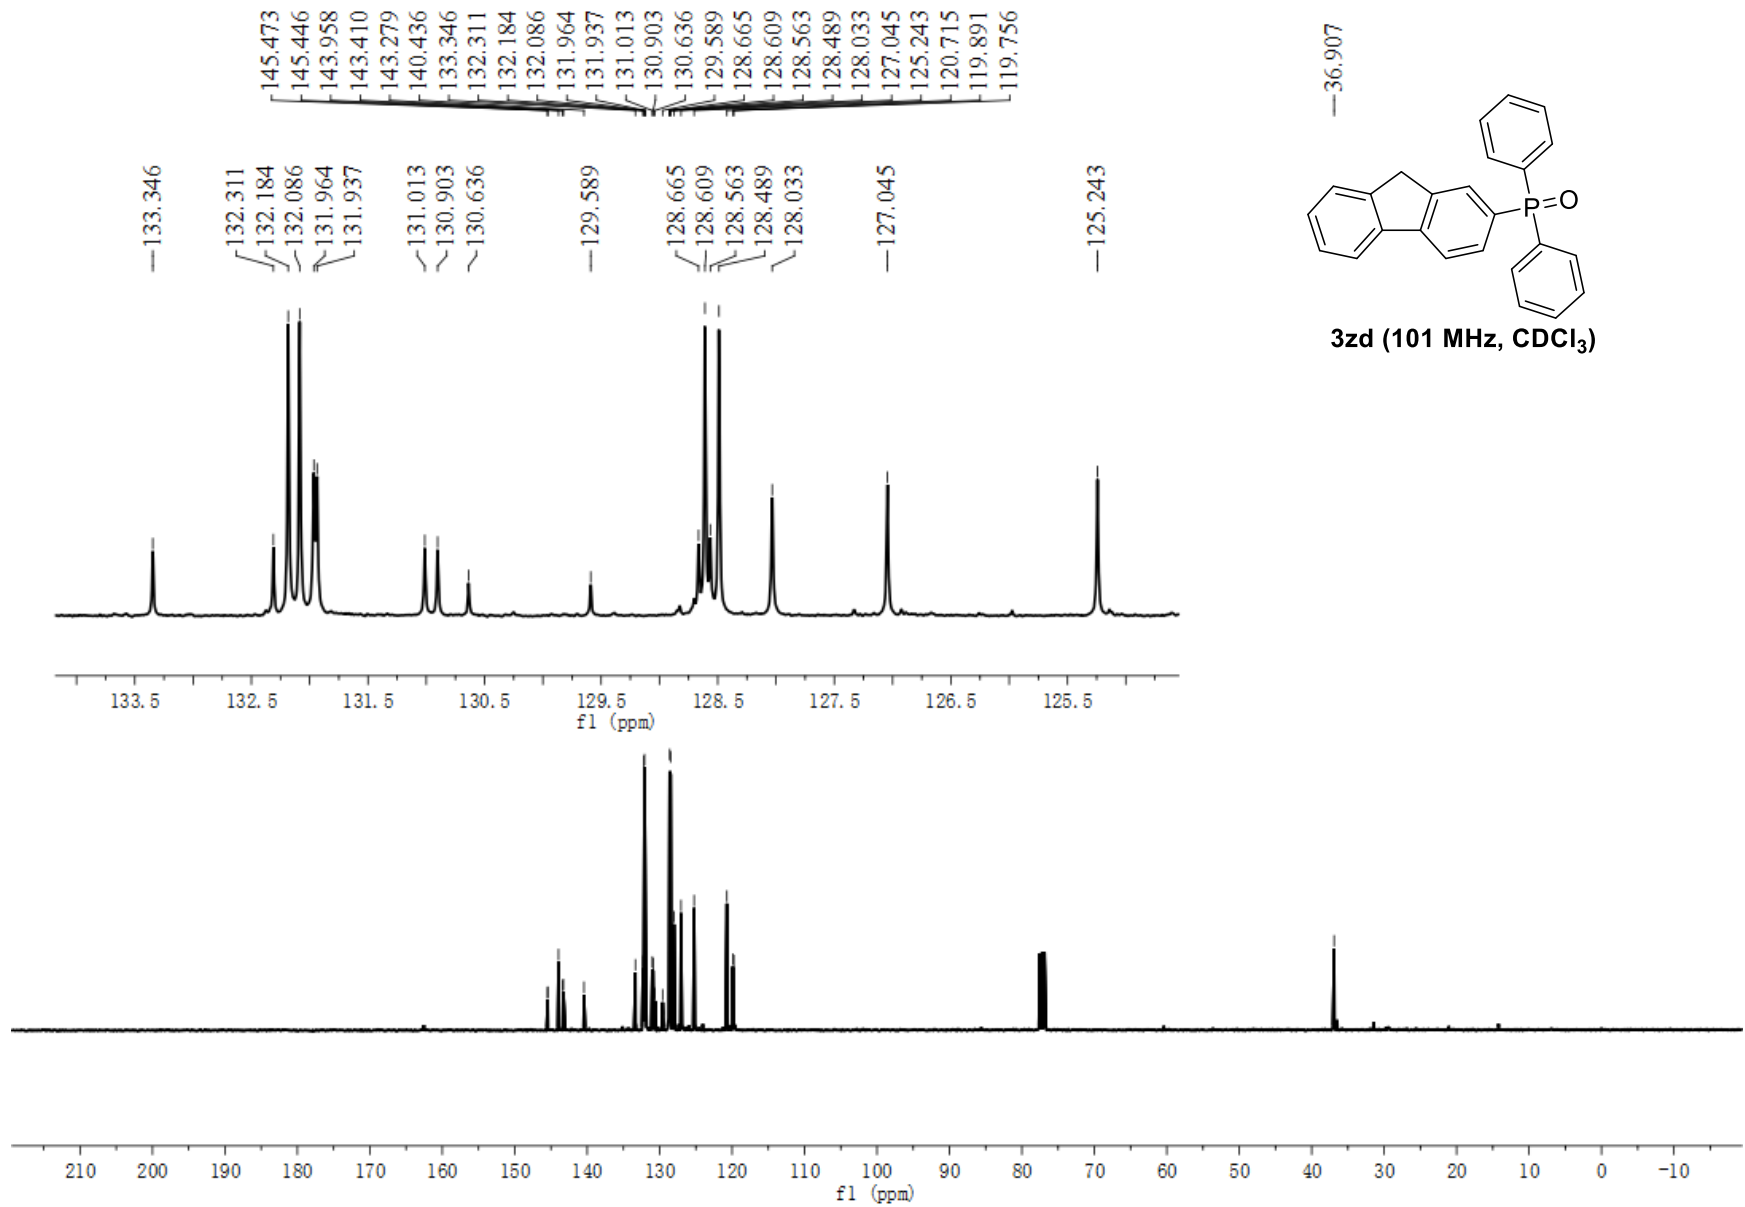

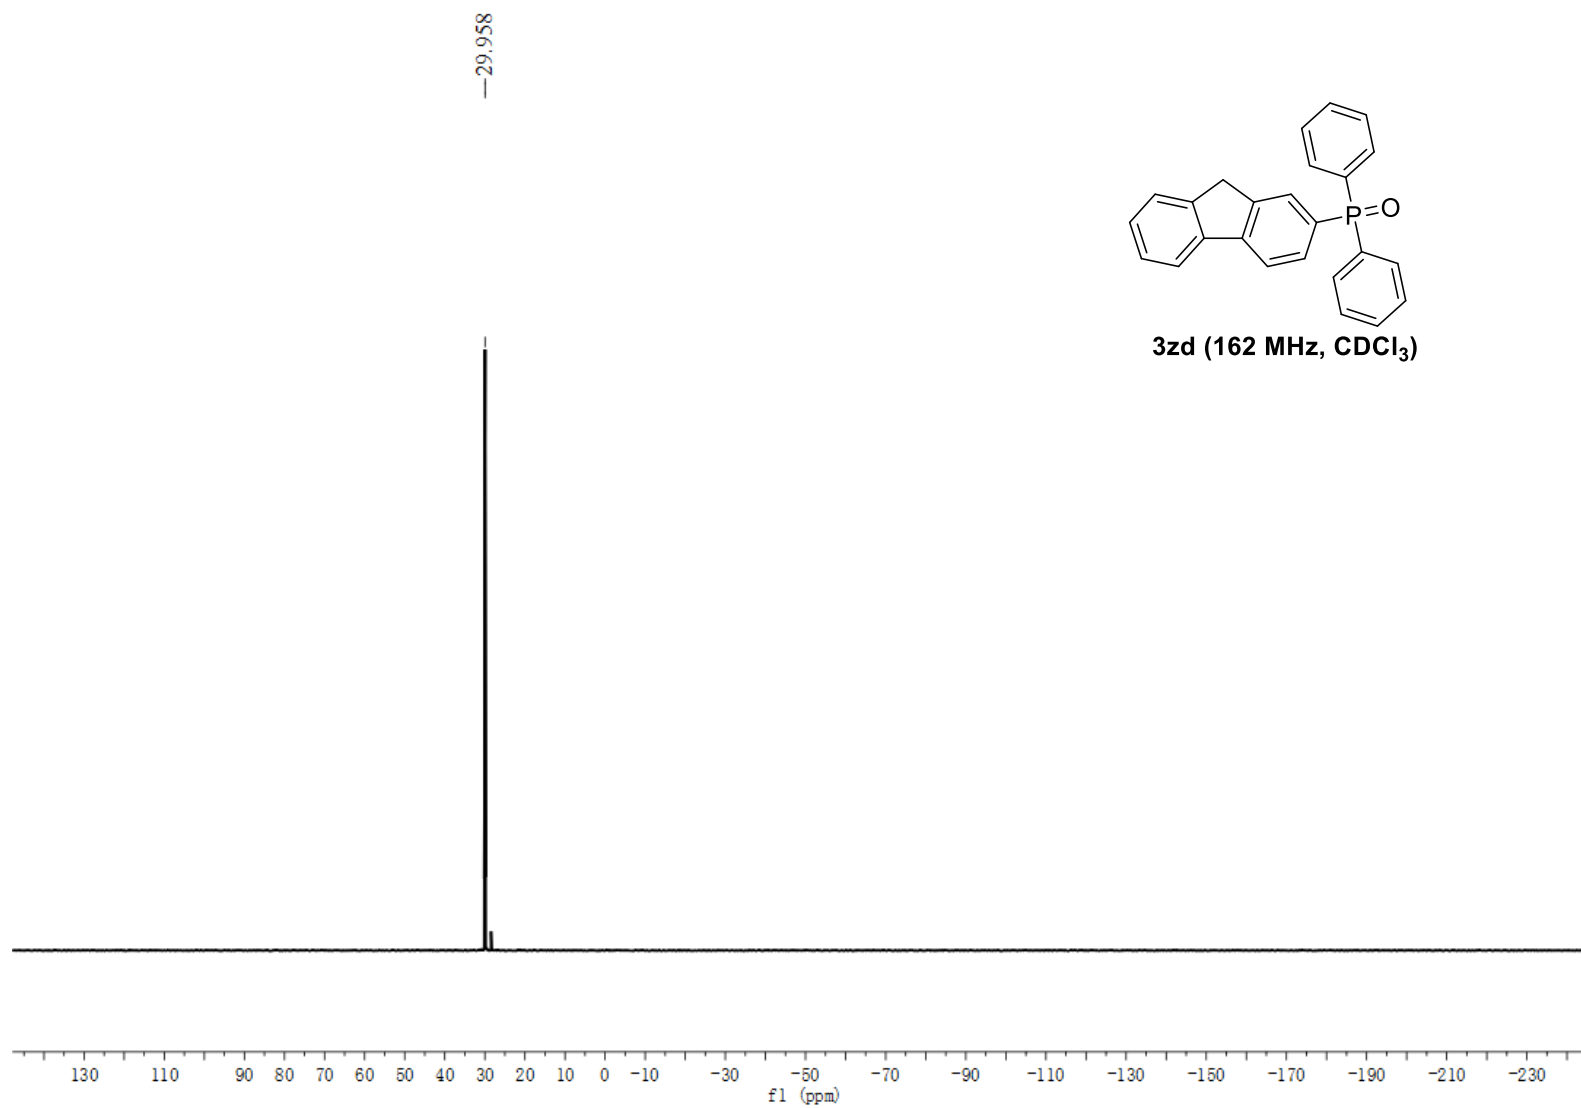

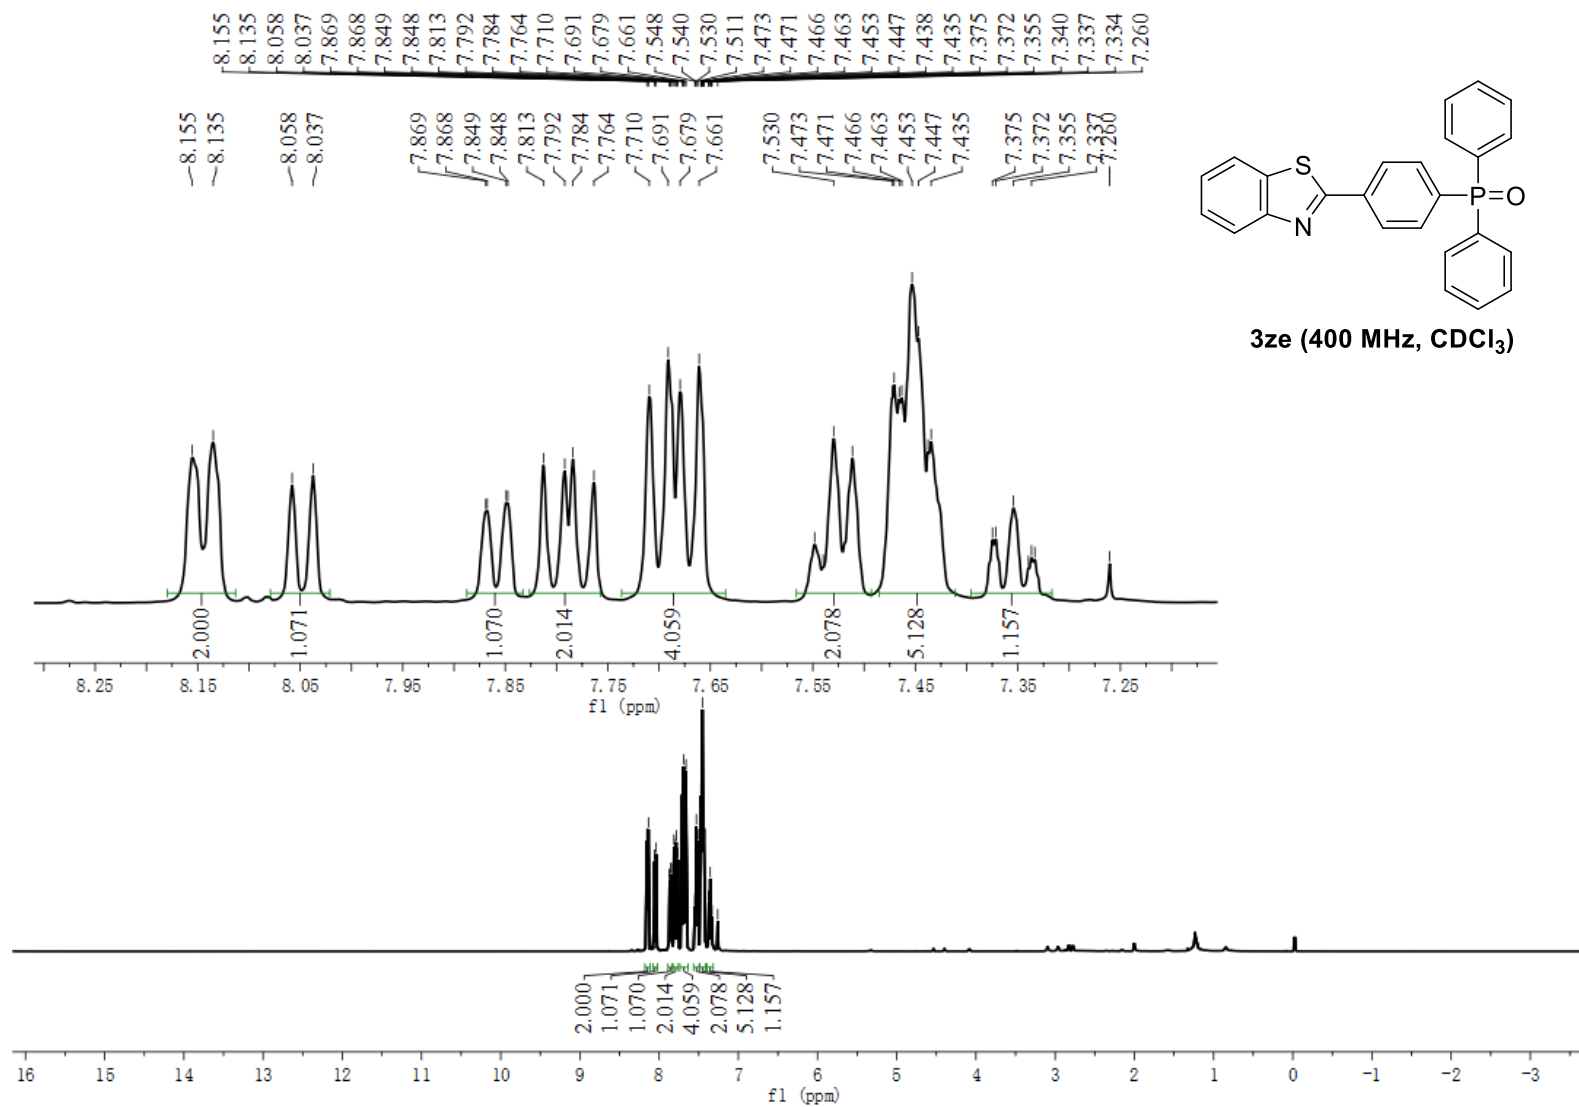

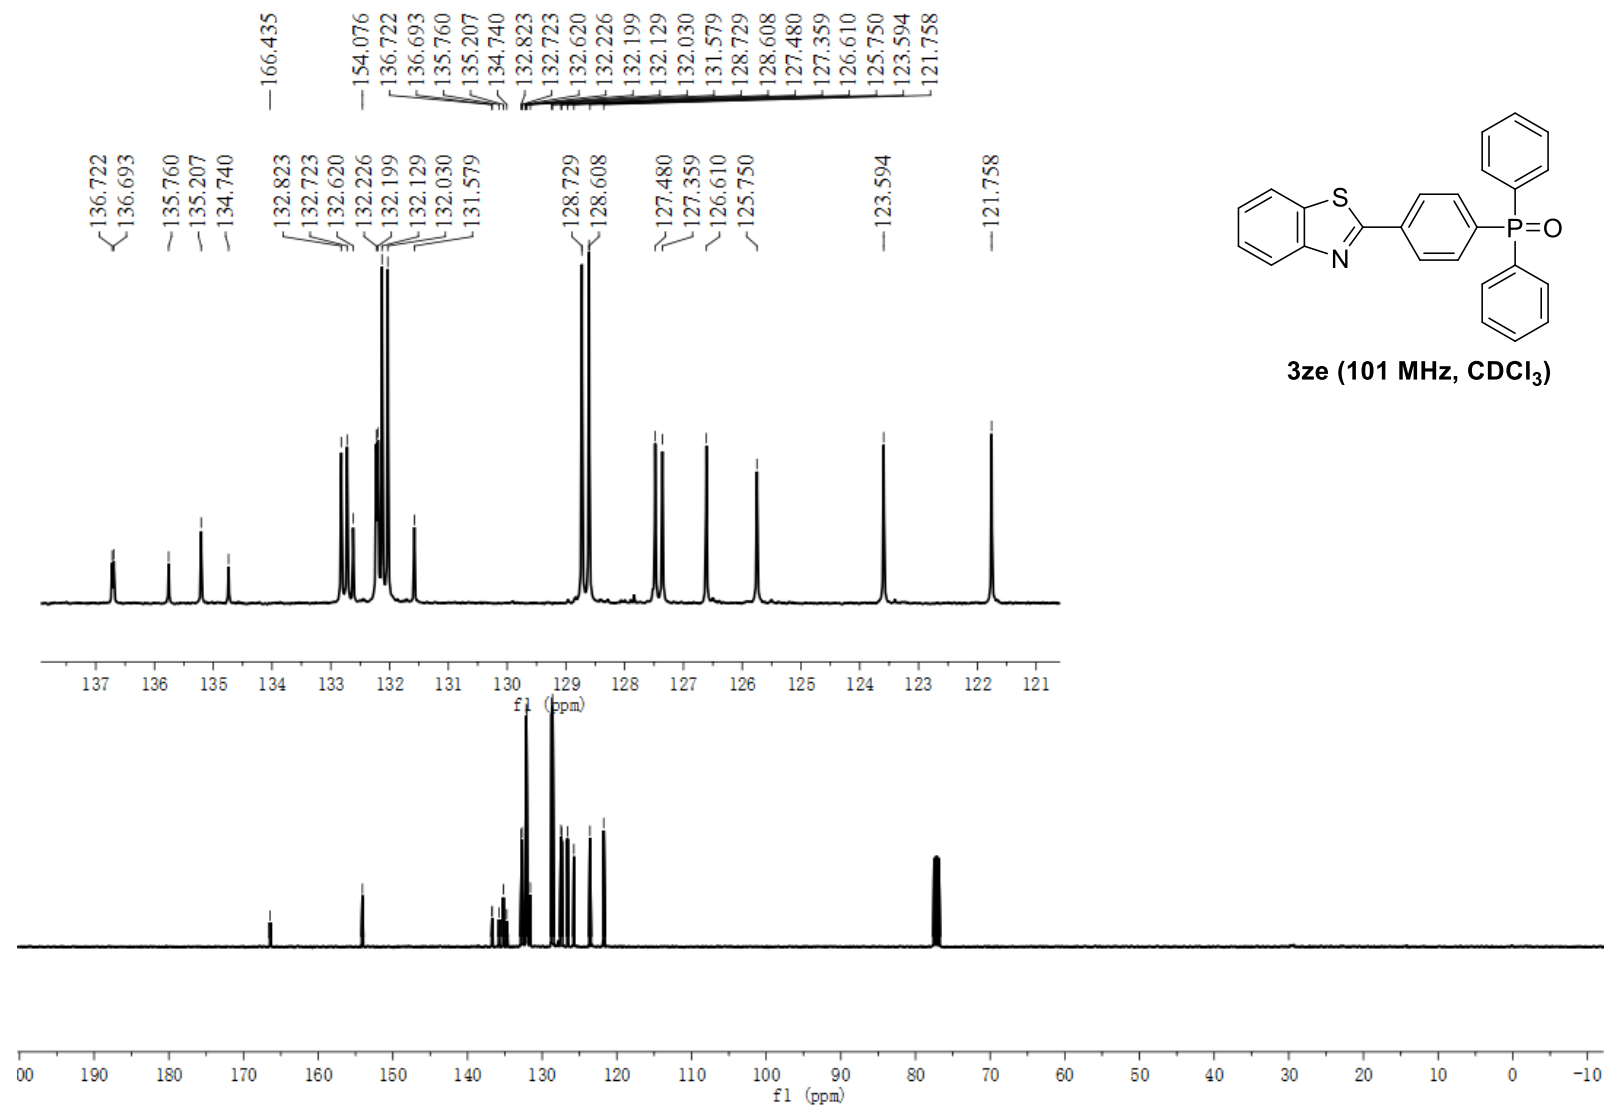

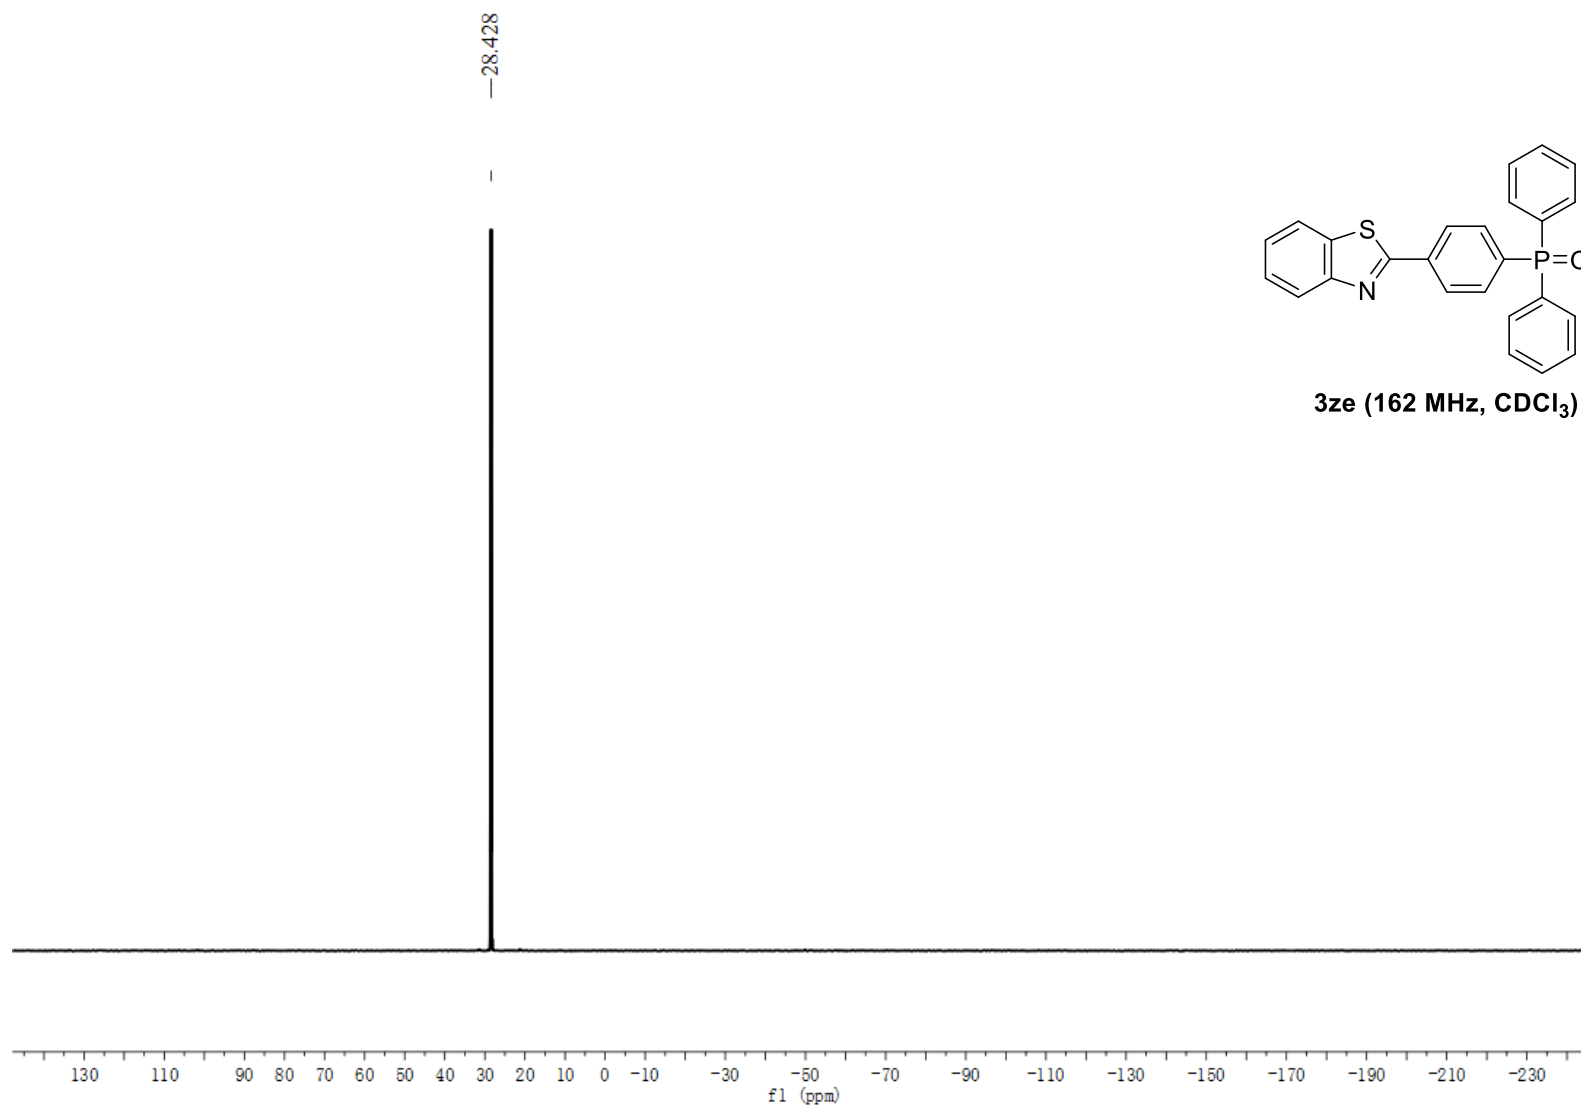

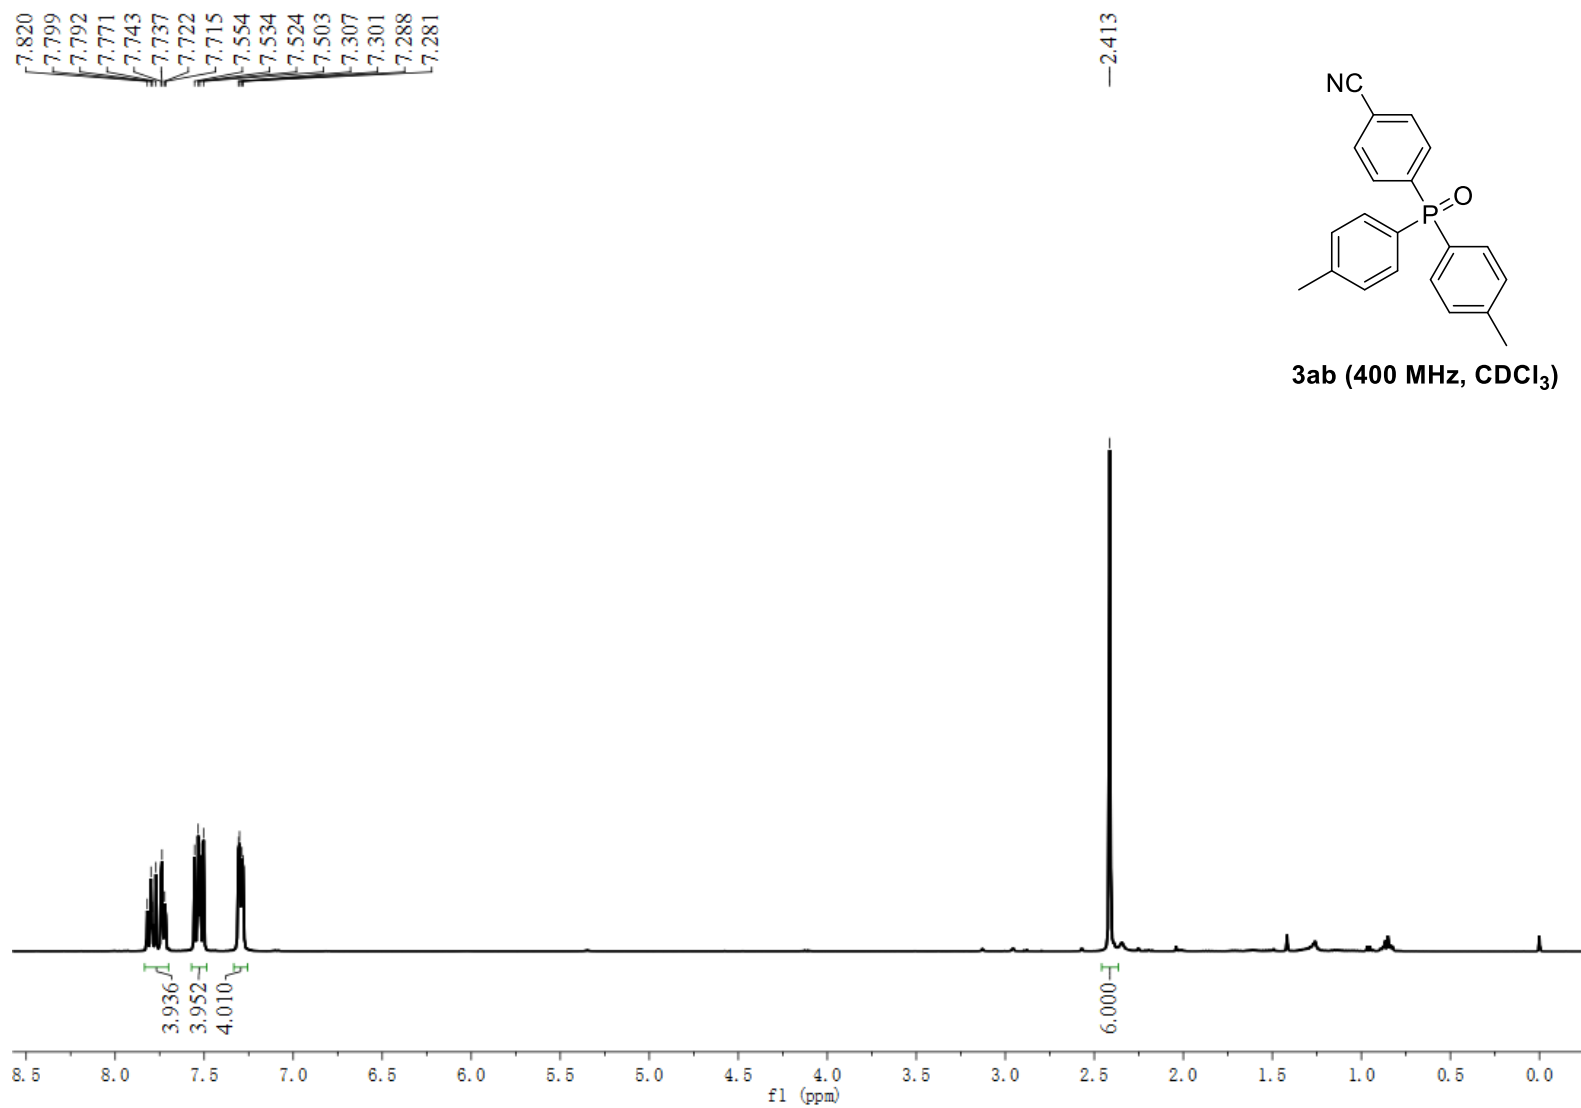



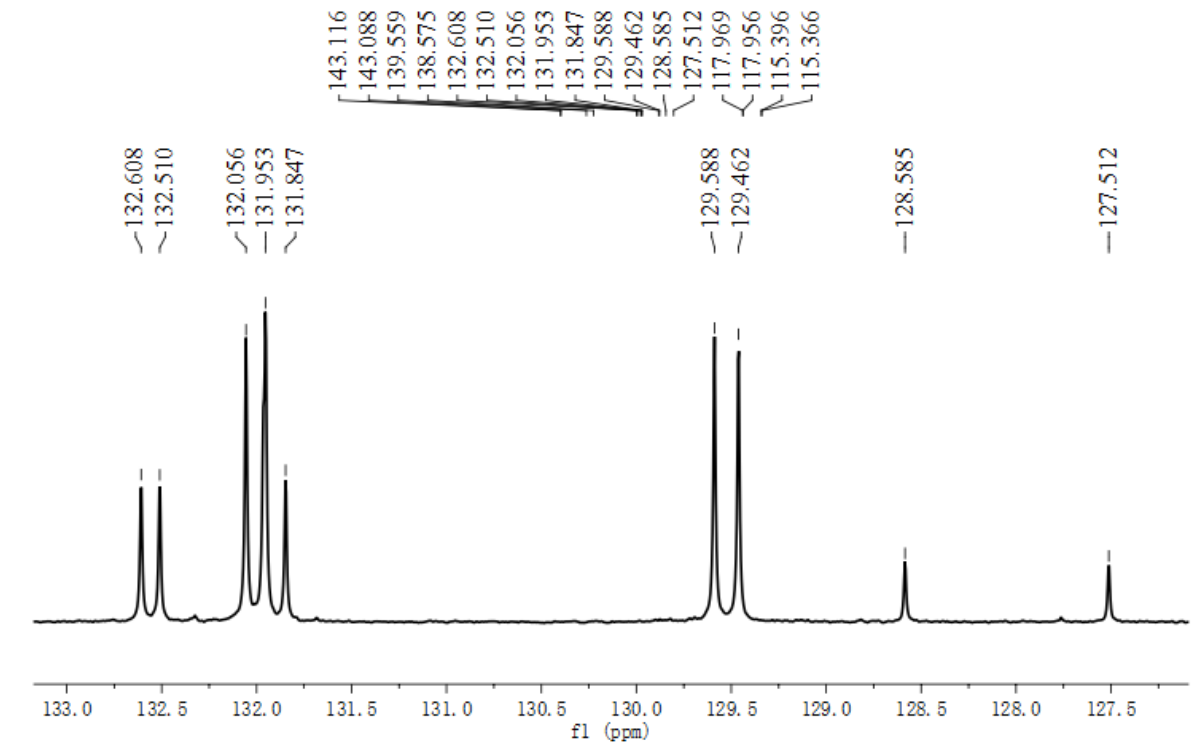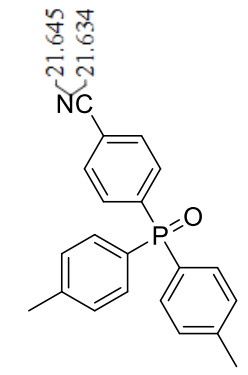

**3ab (101 MHz, CDCl<sub>3</sub>)**

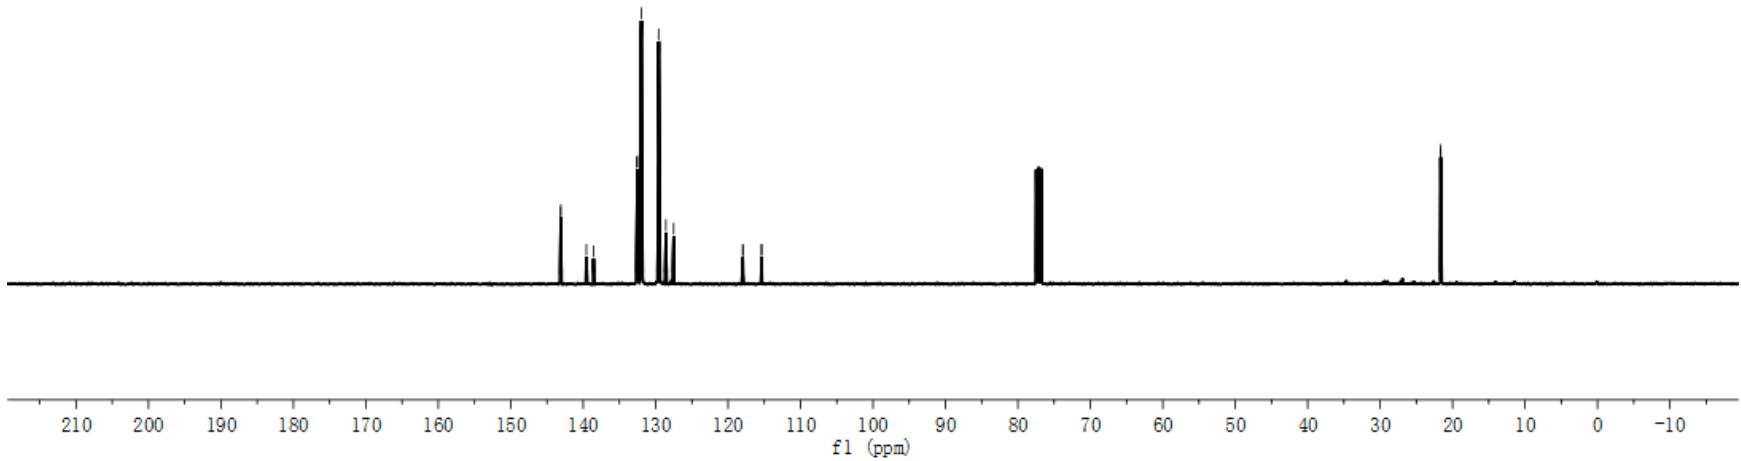

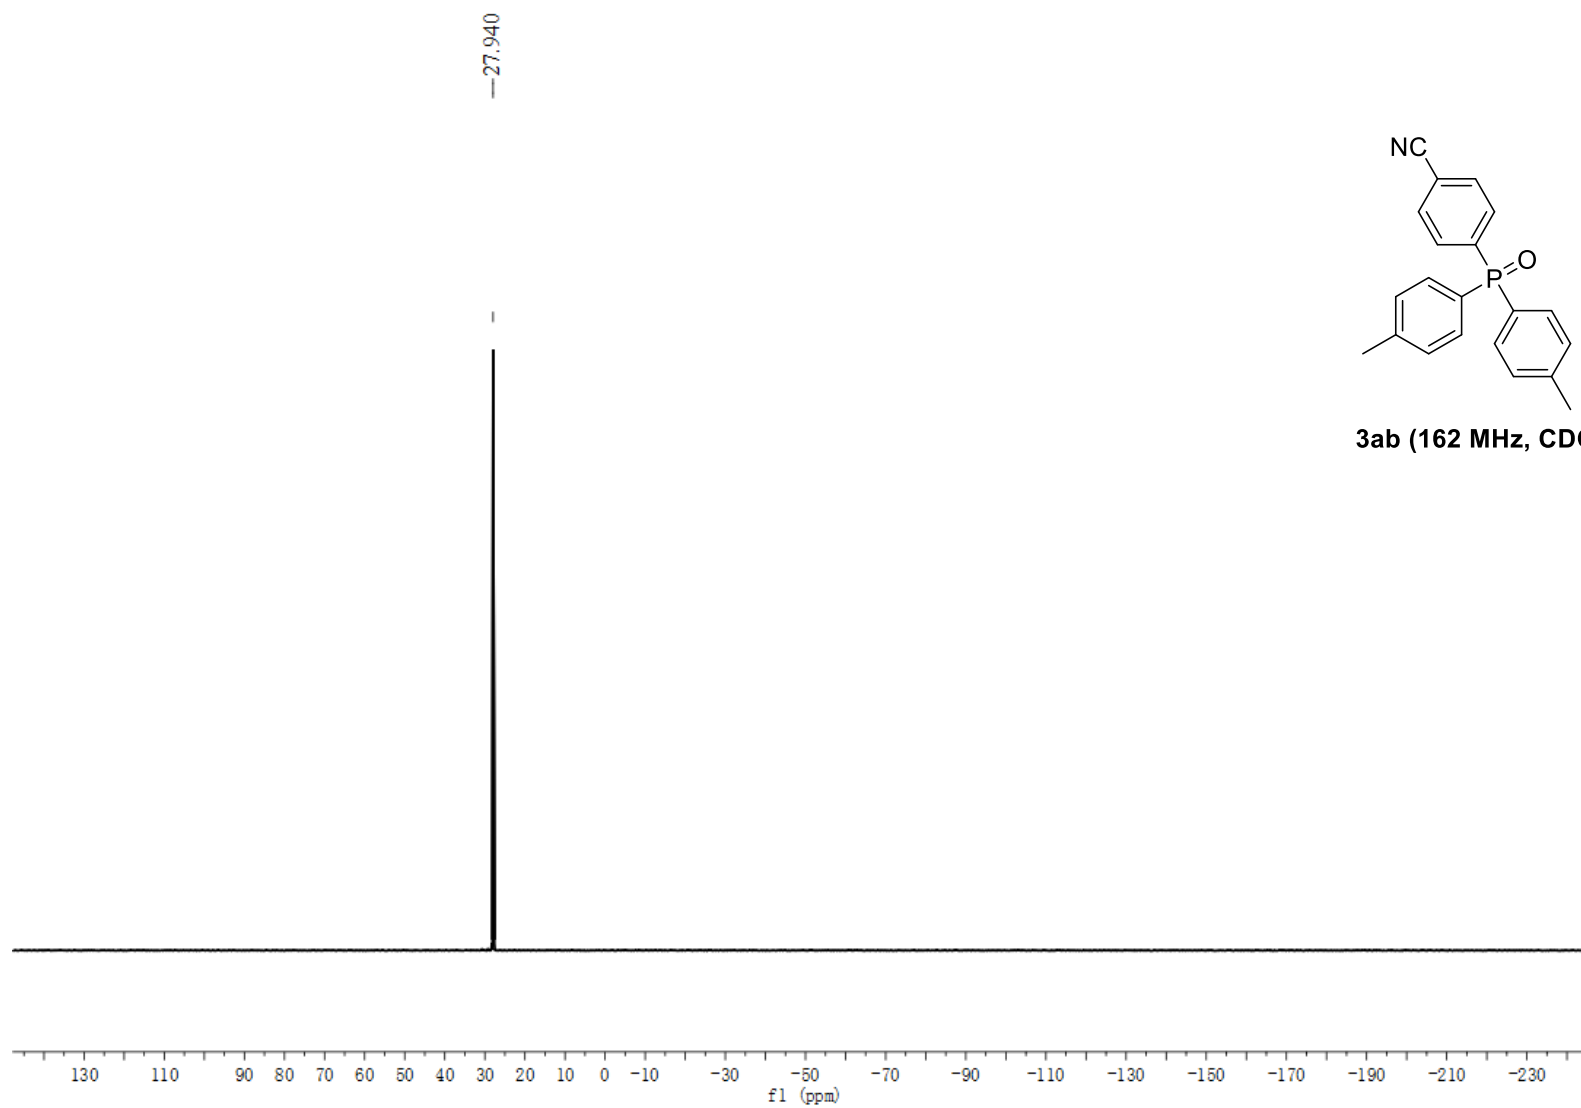

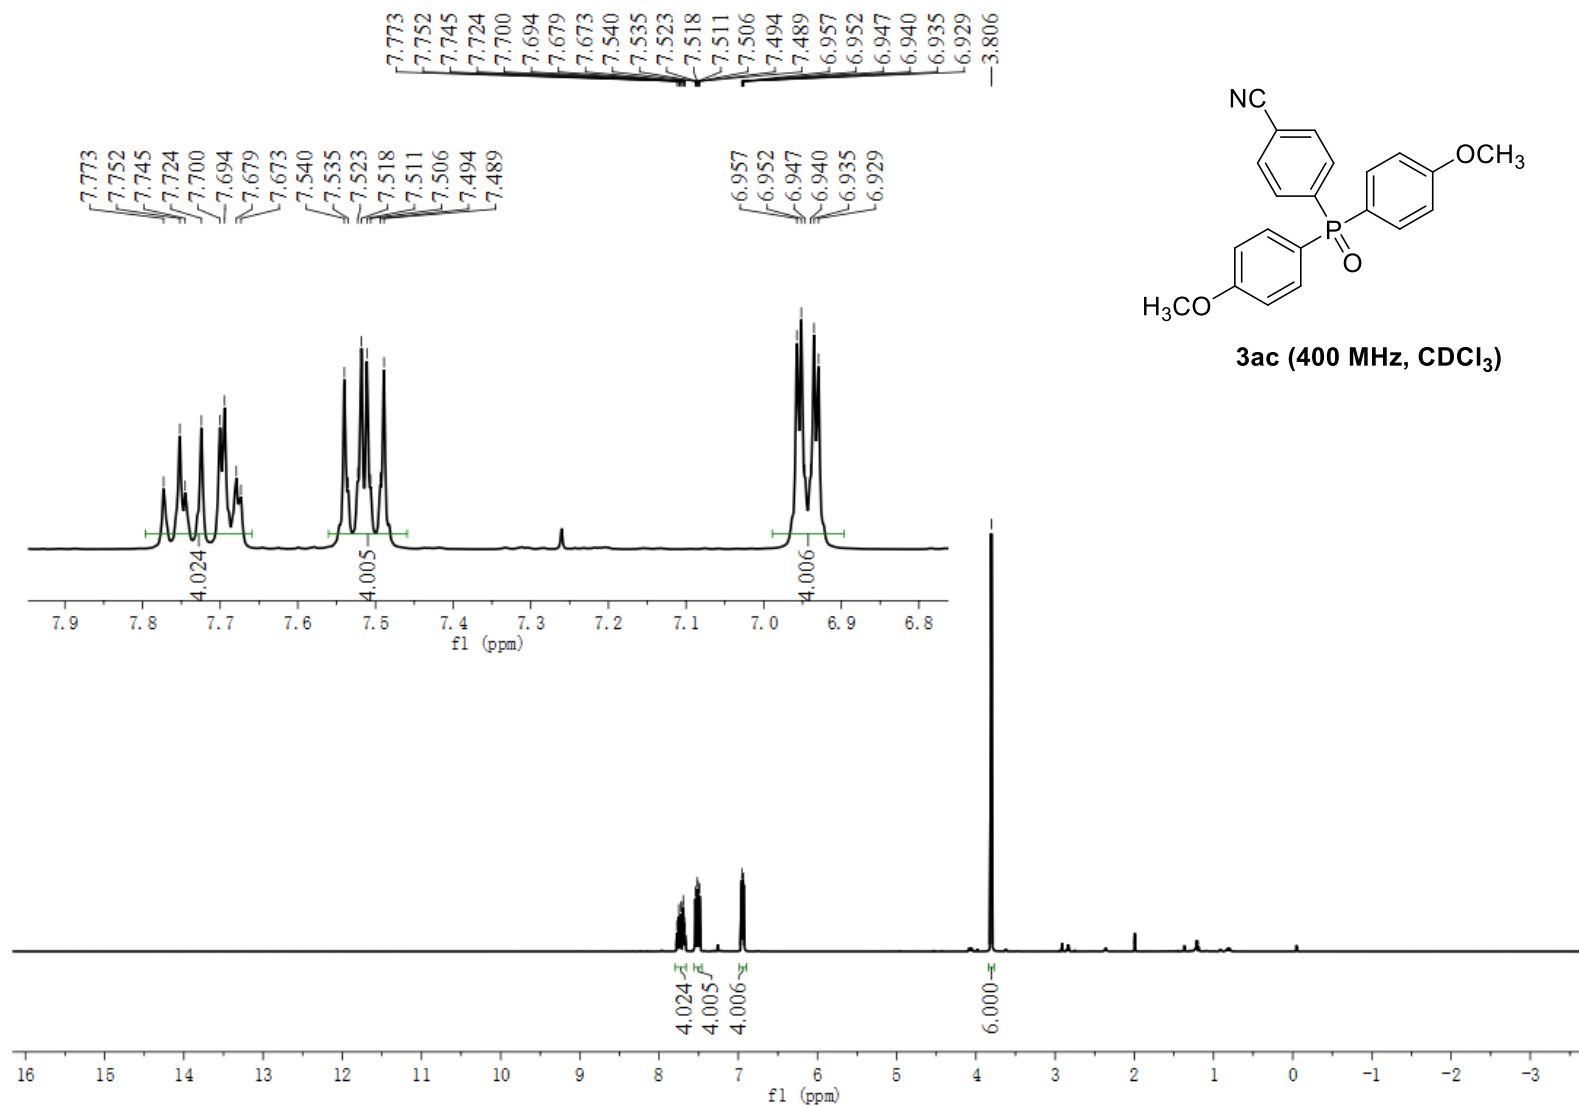

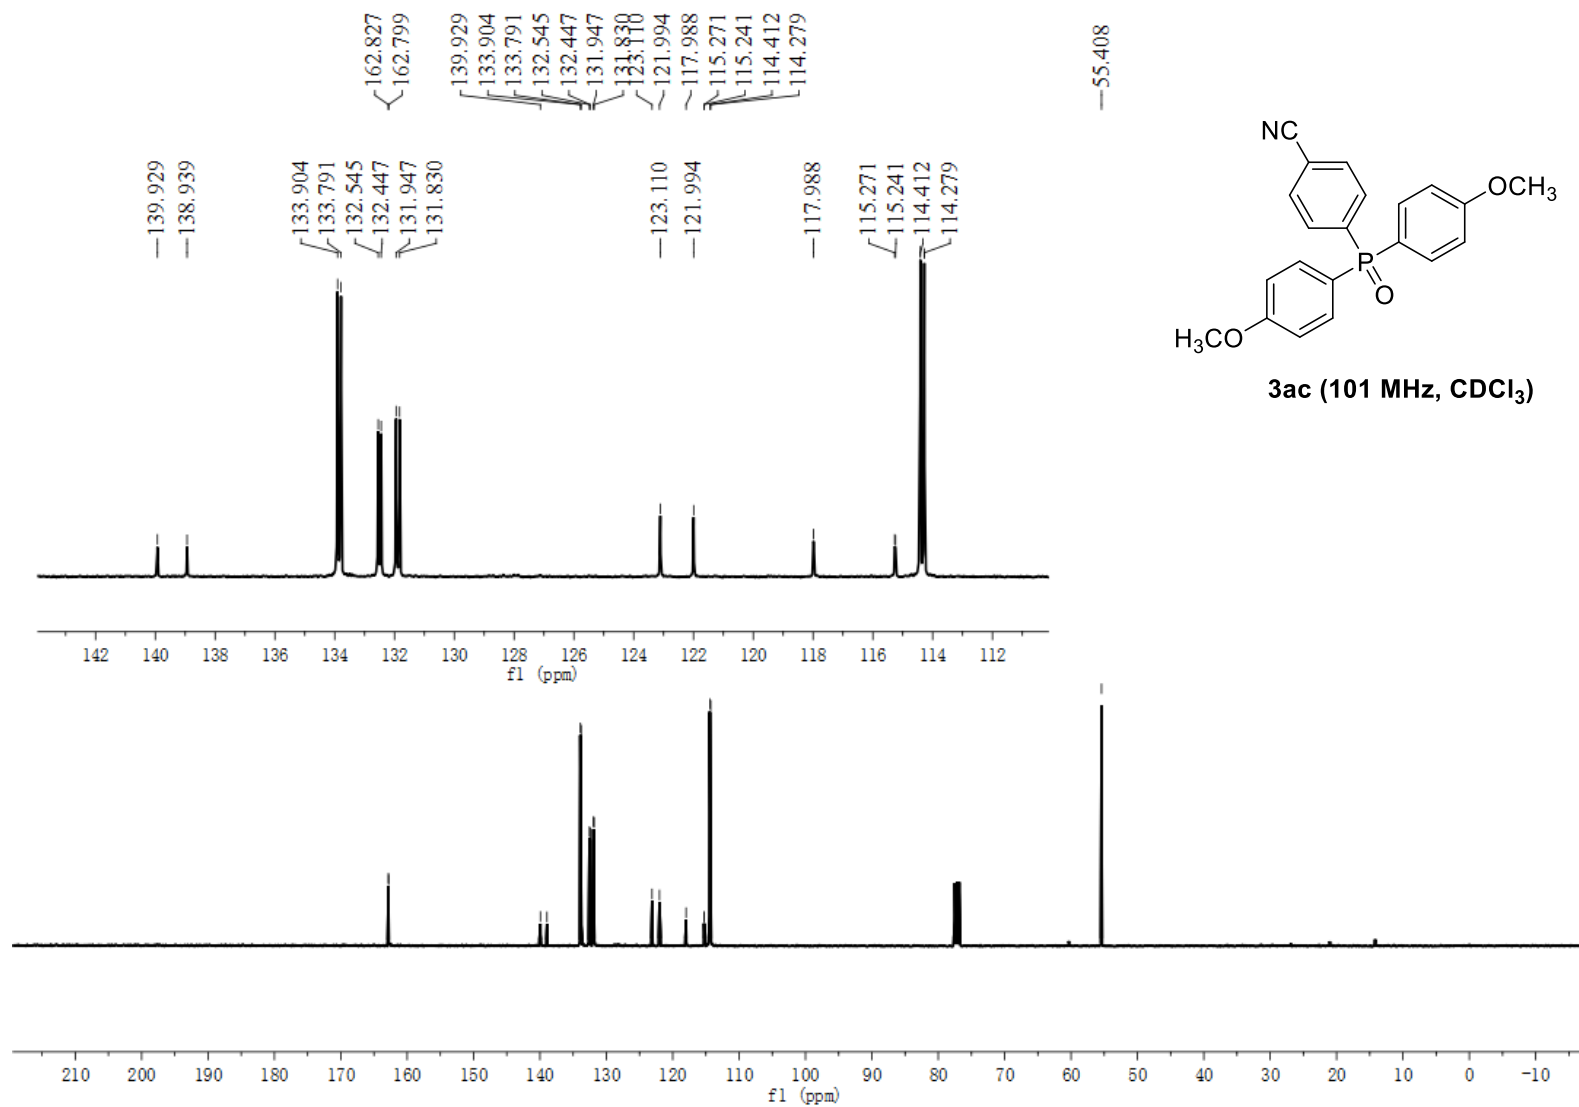

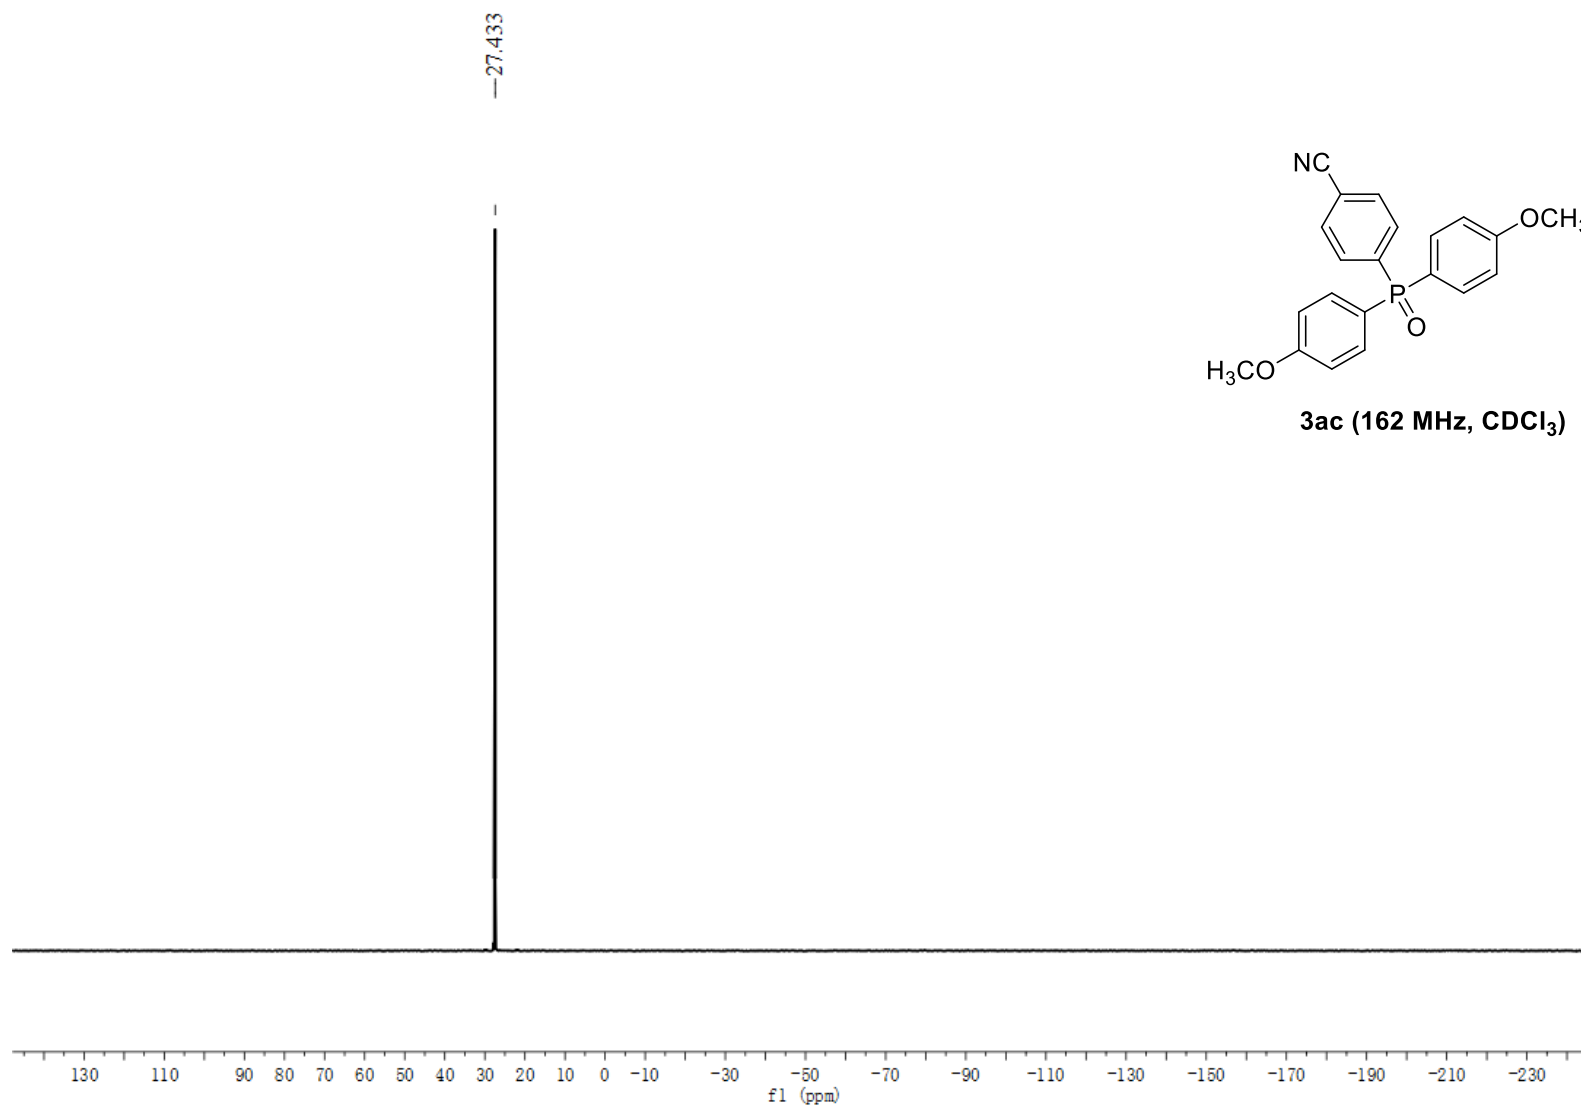

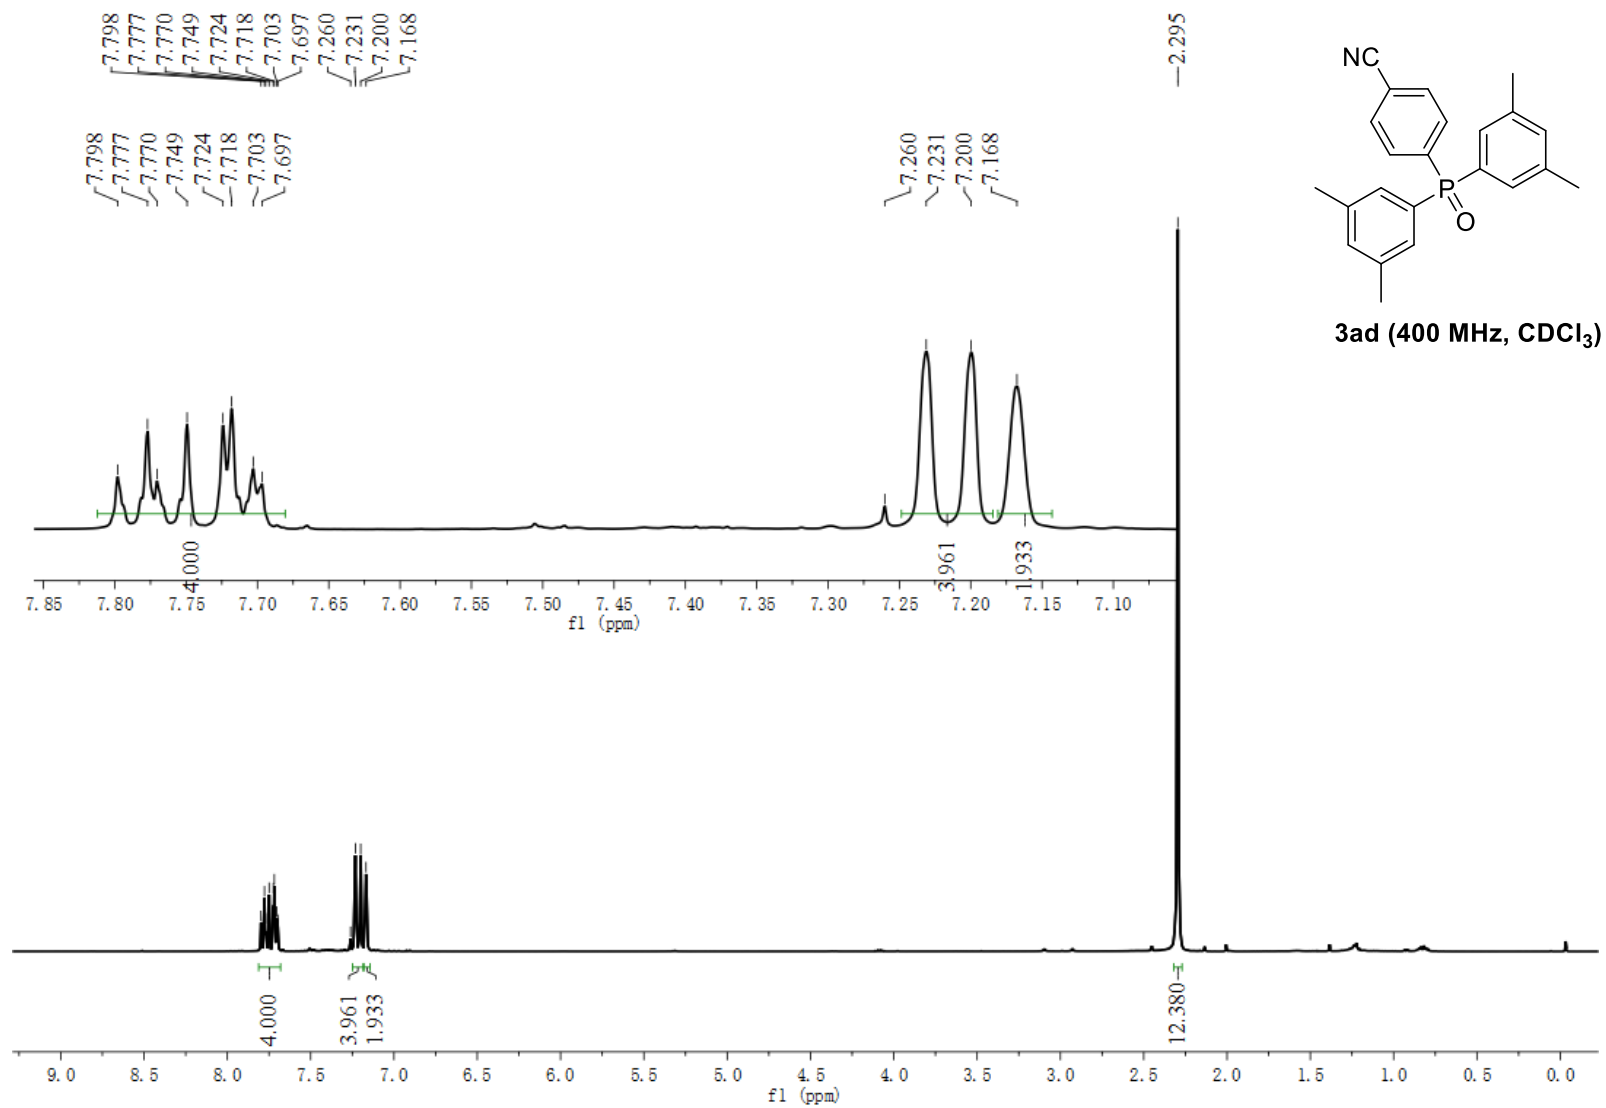

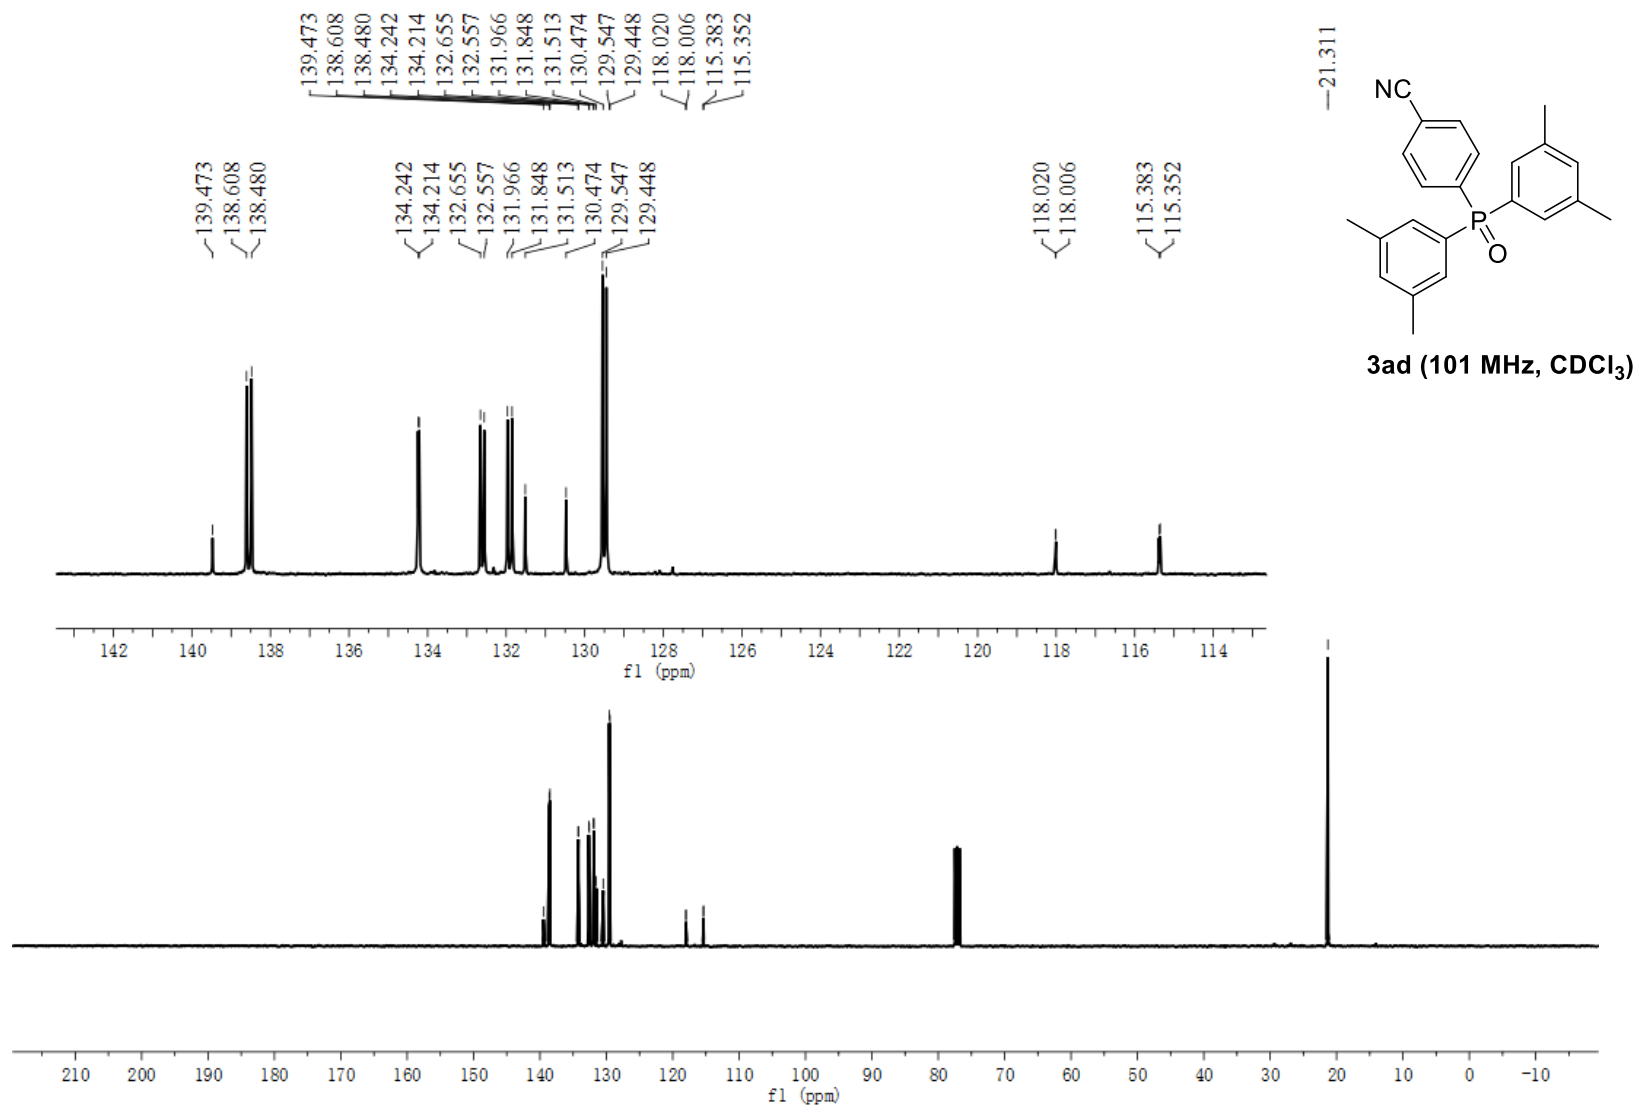

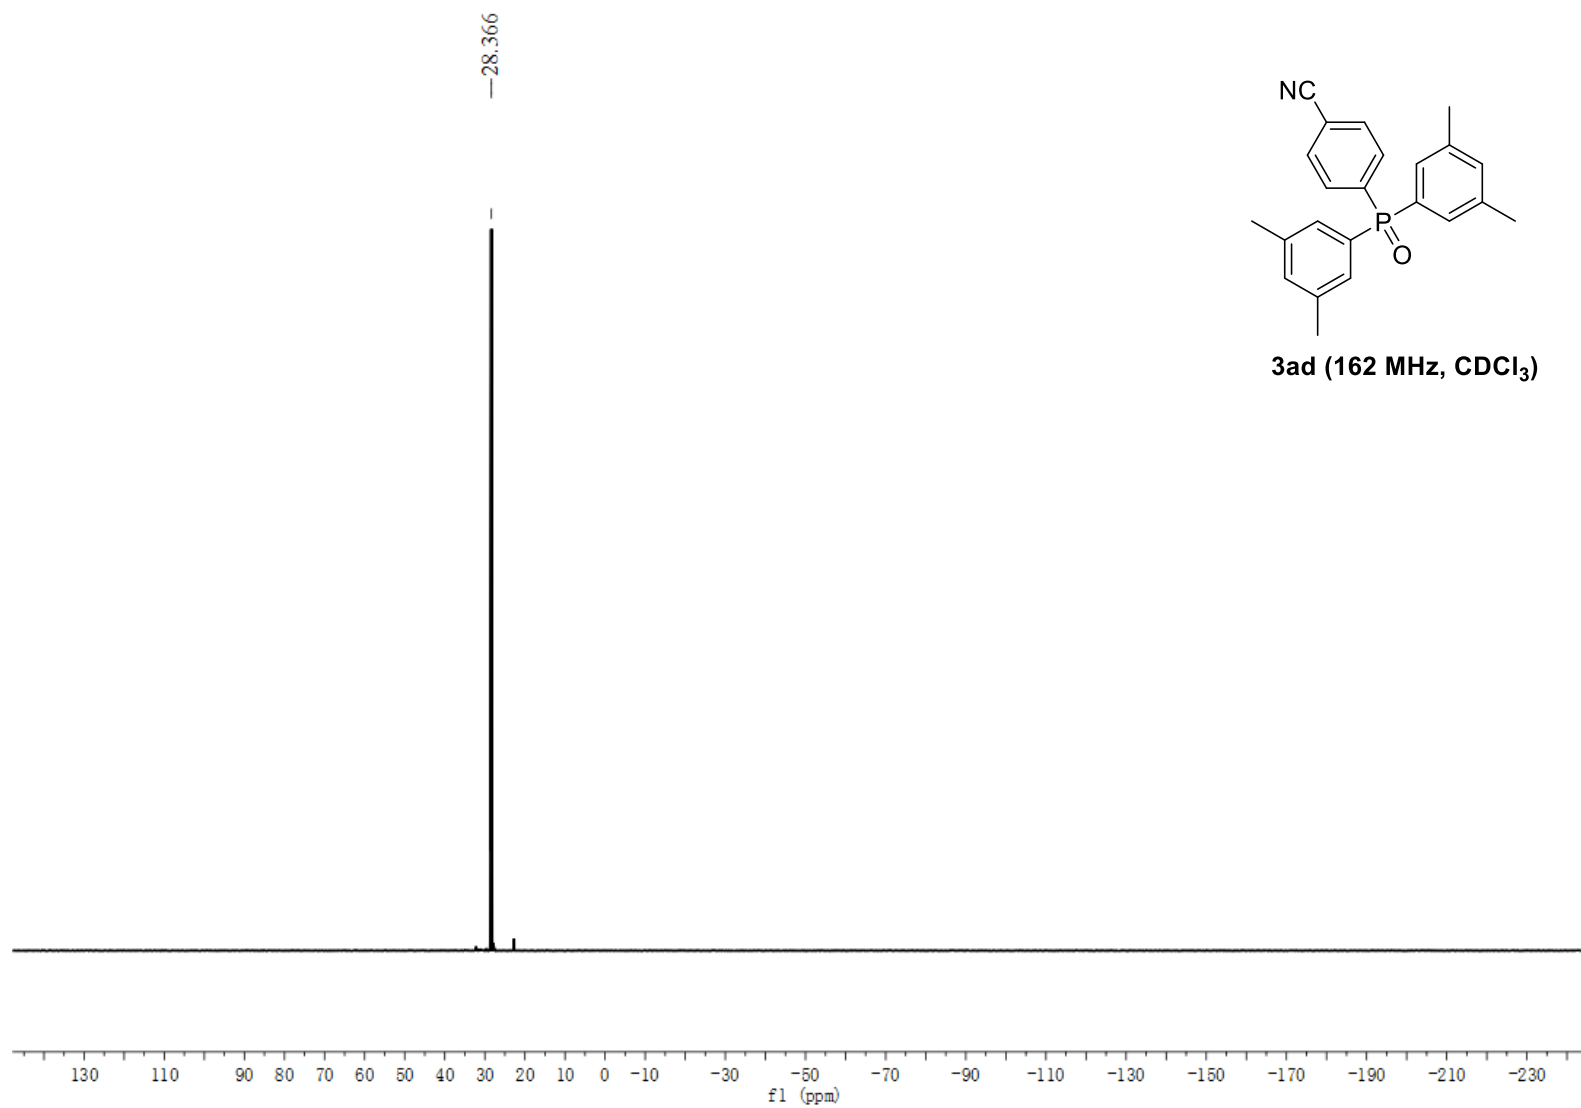



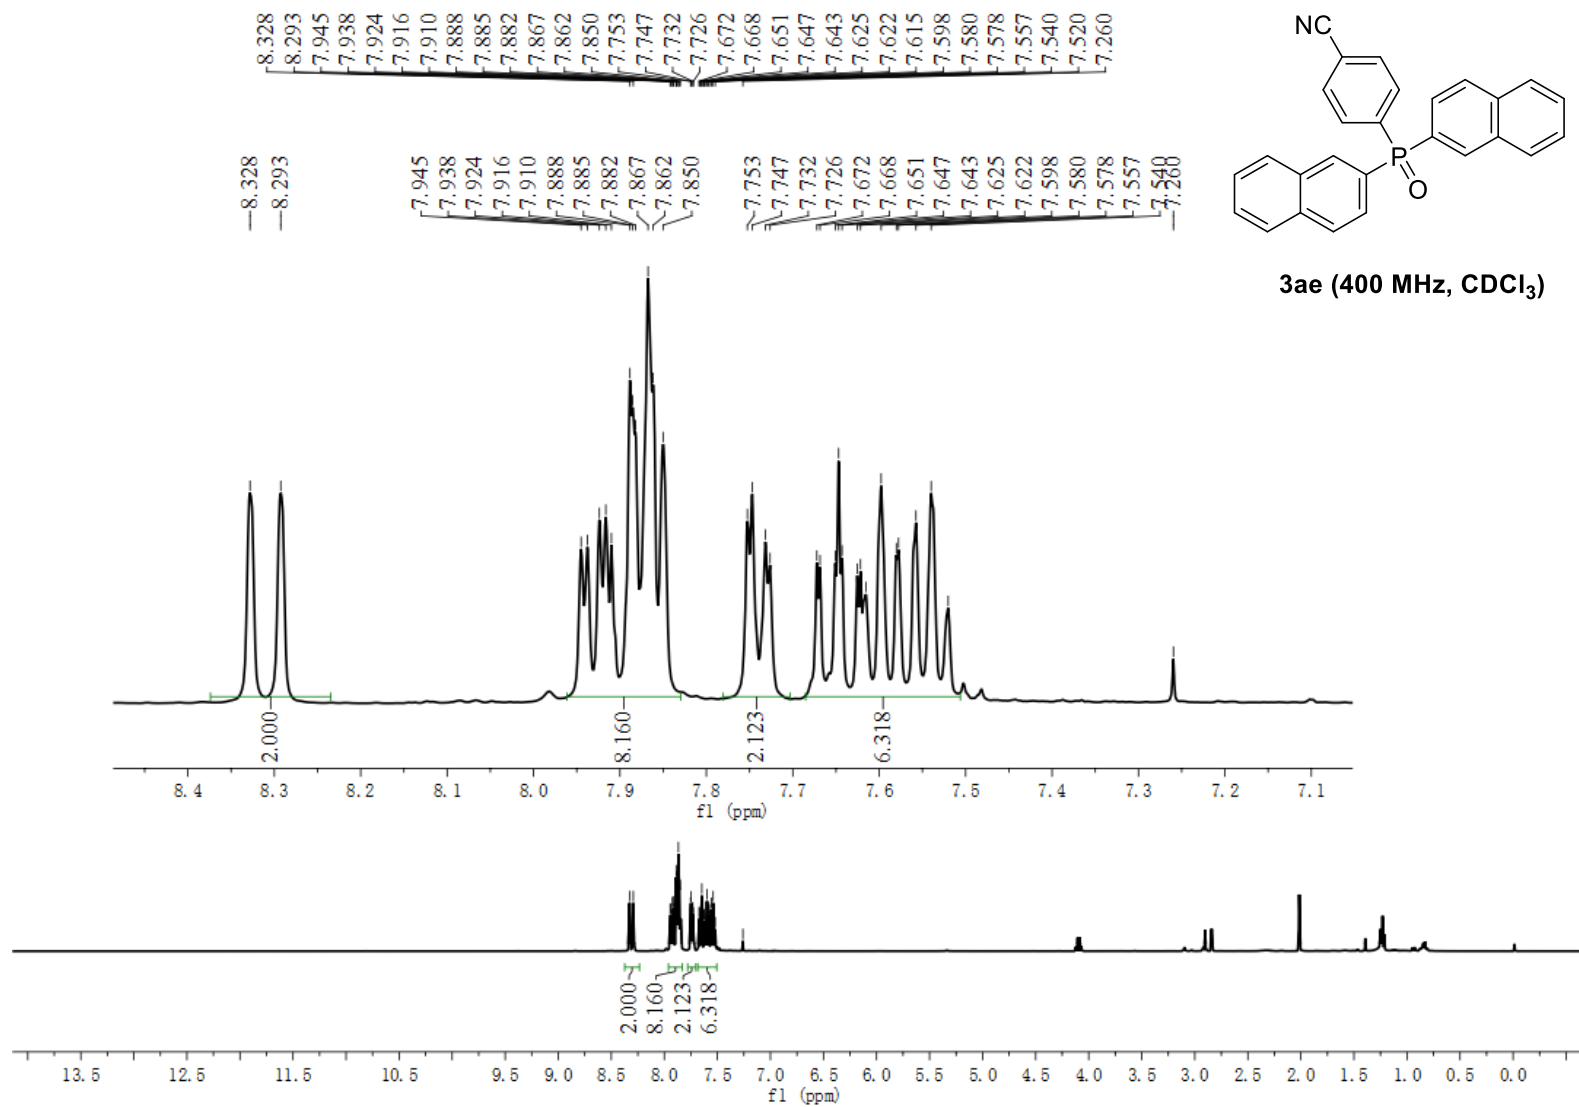

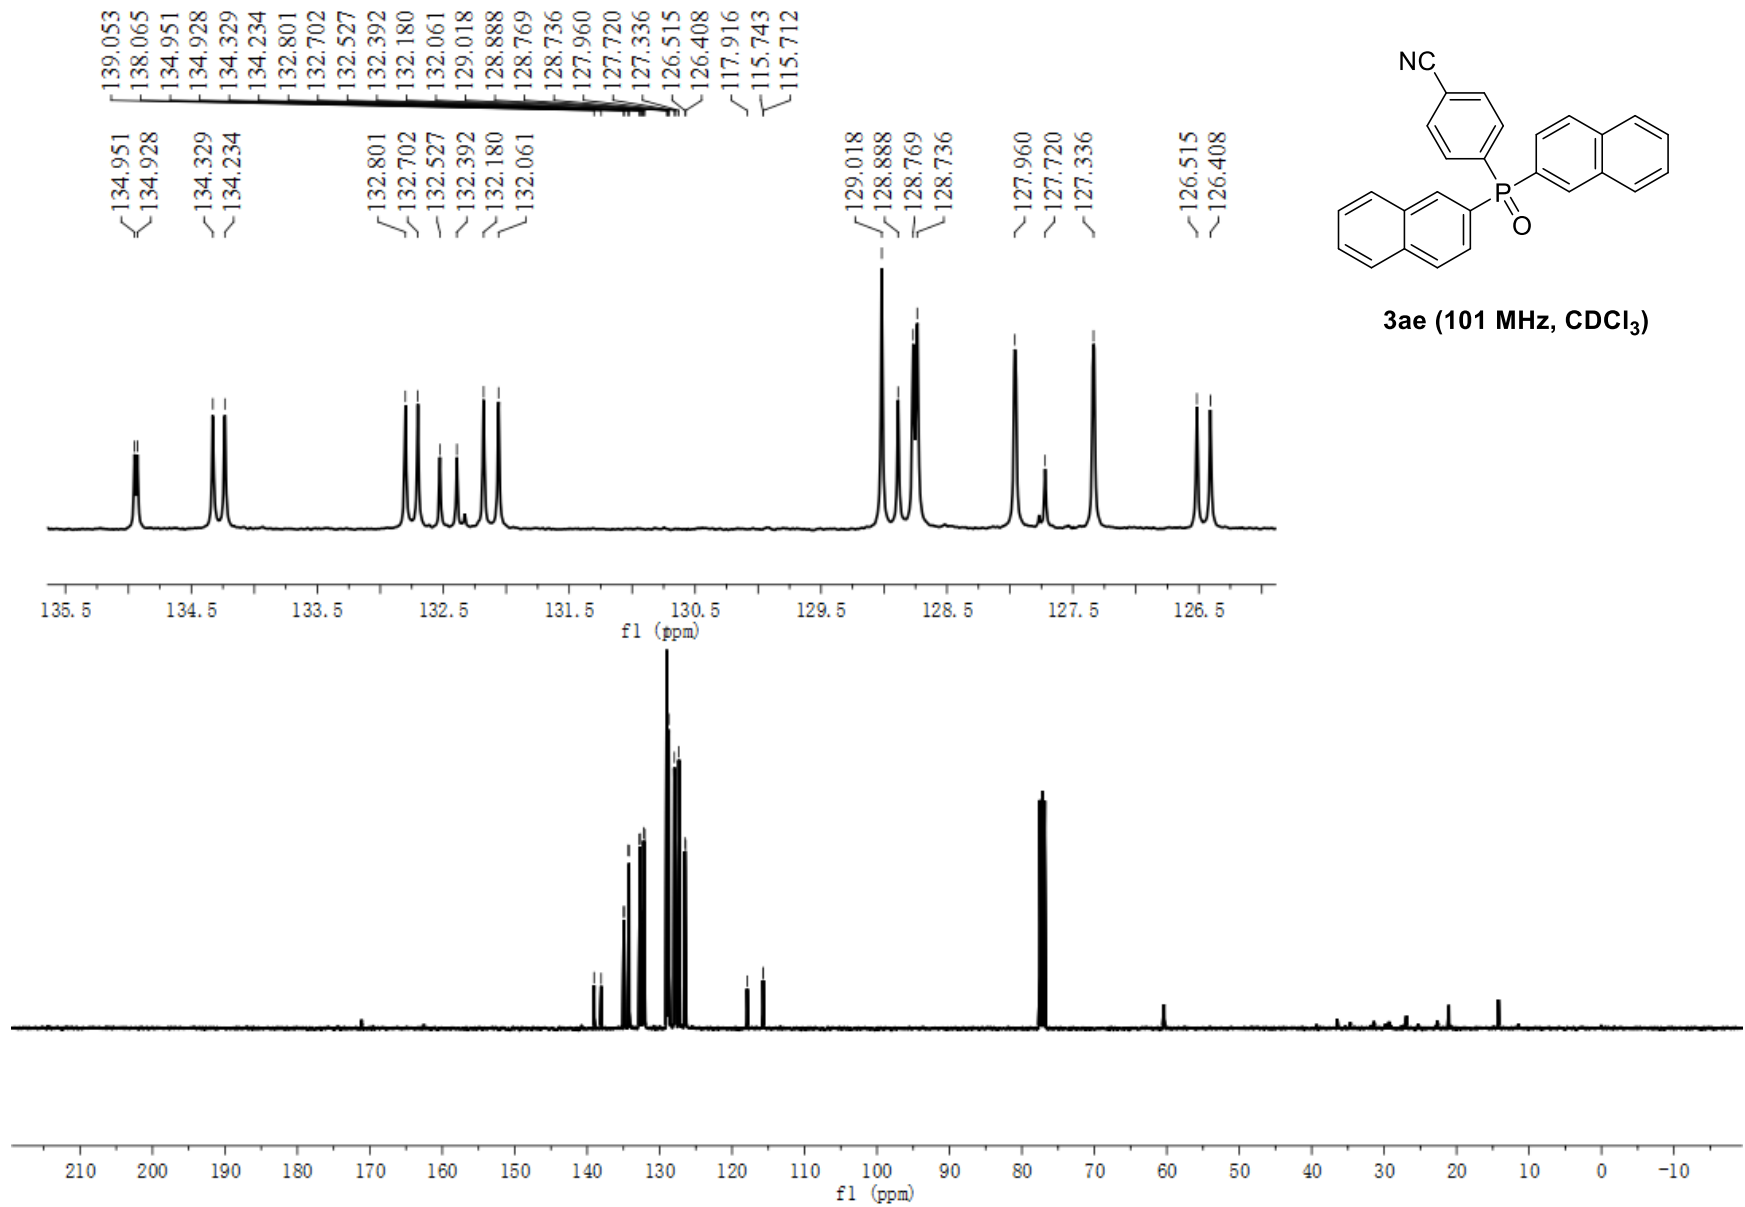

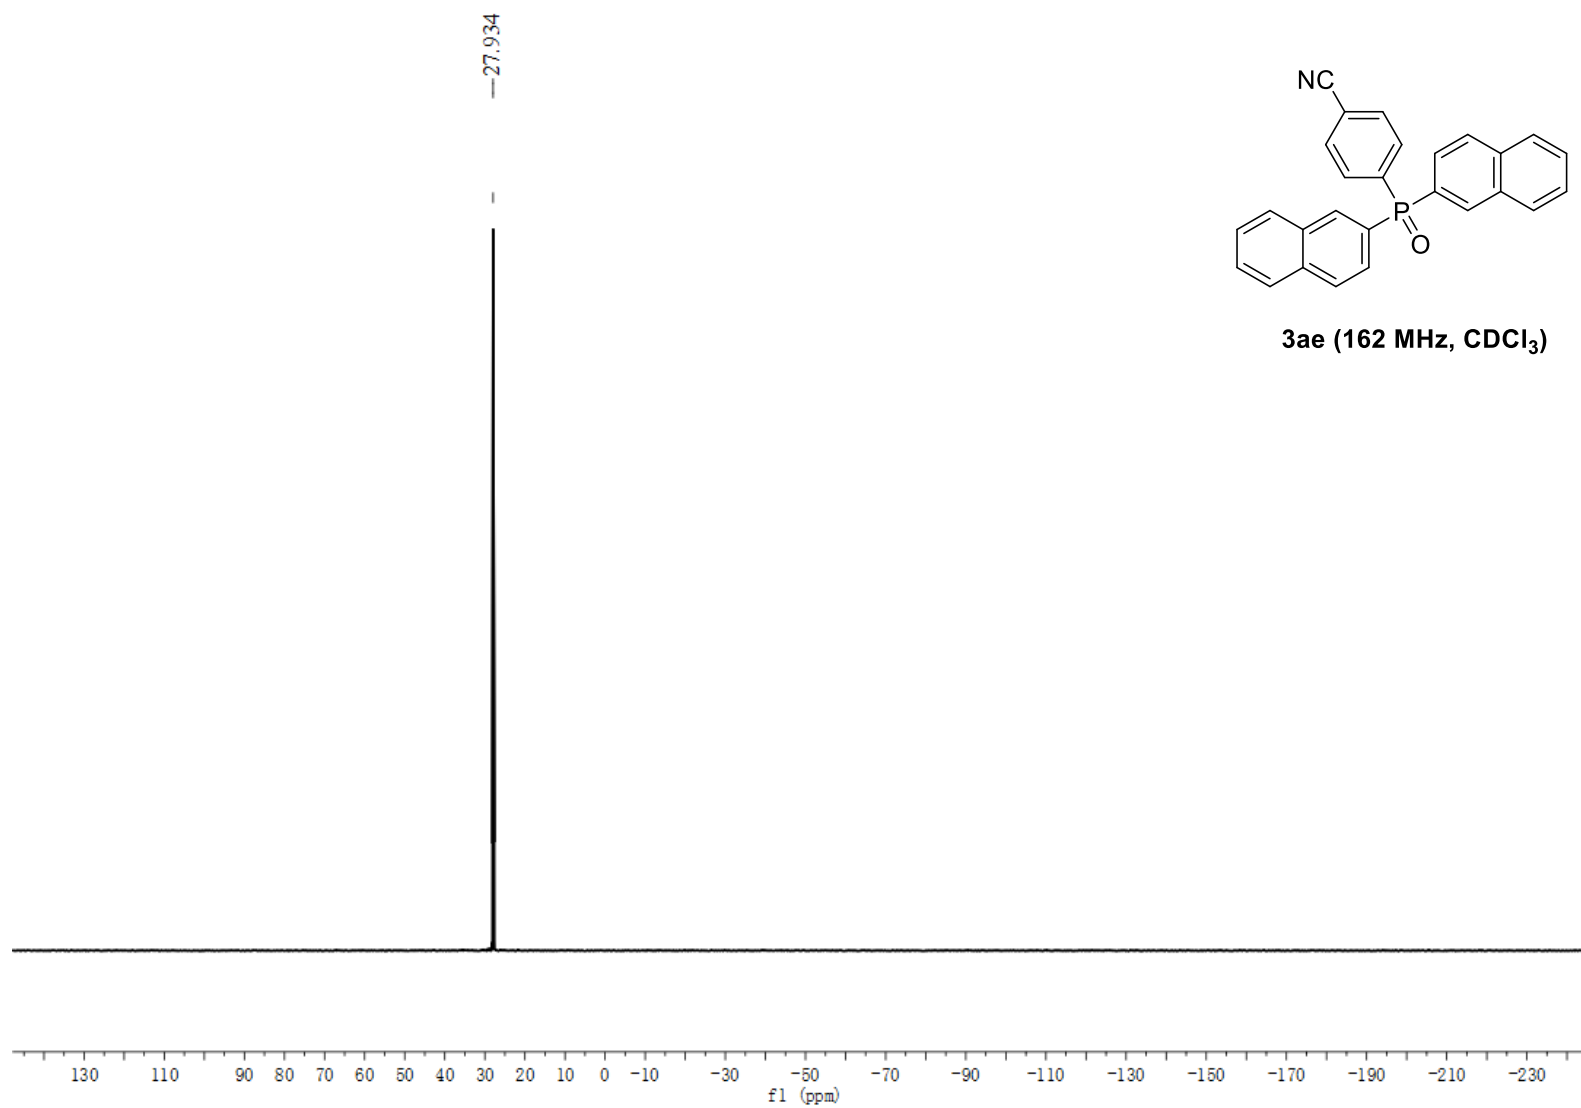

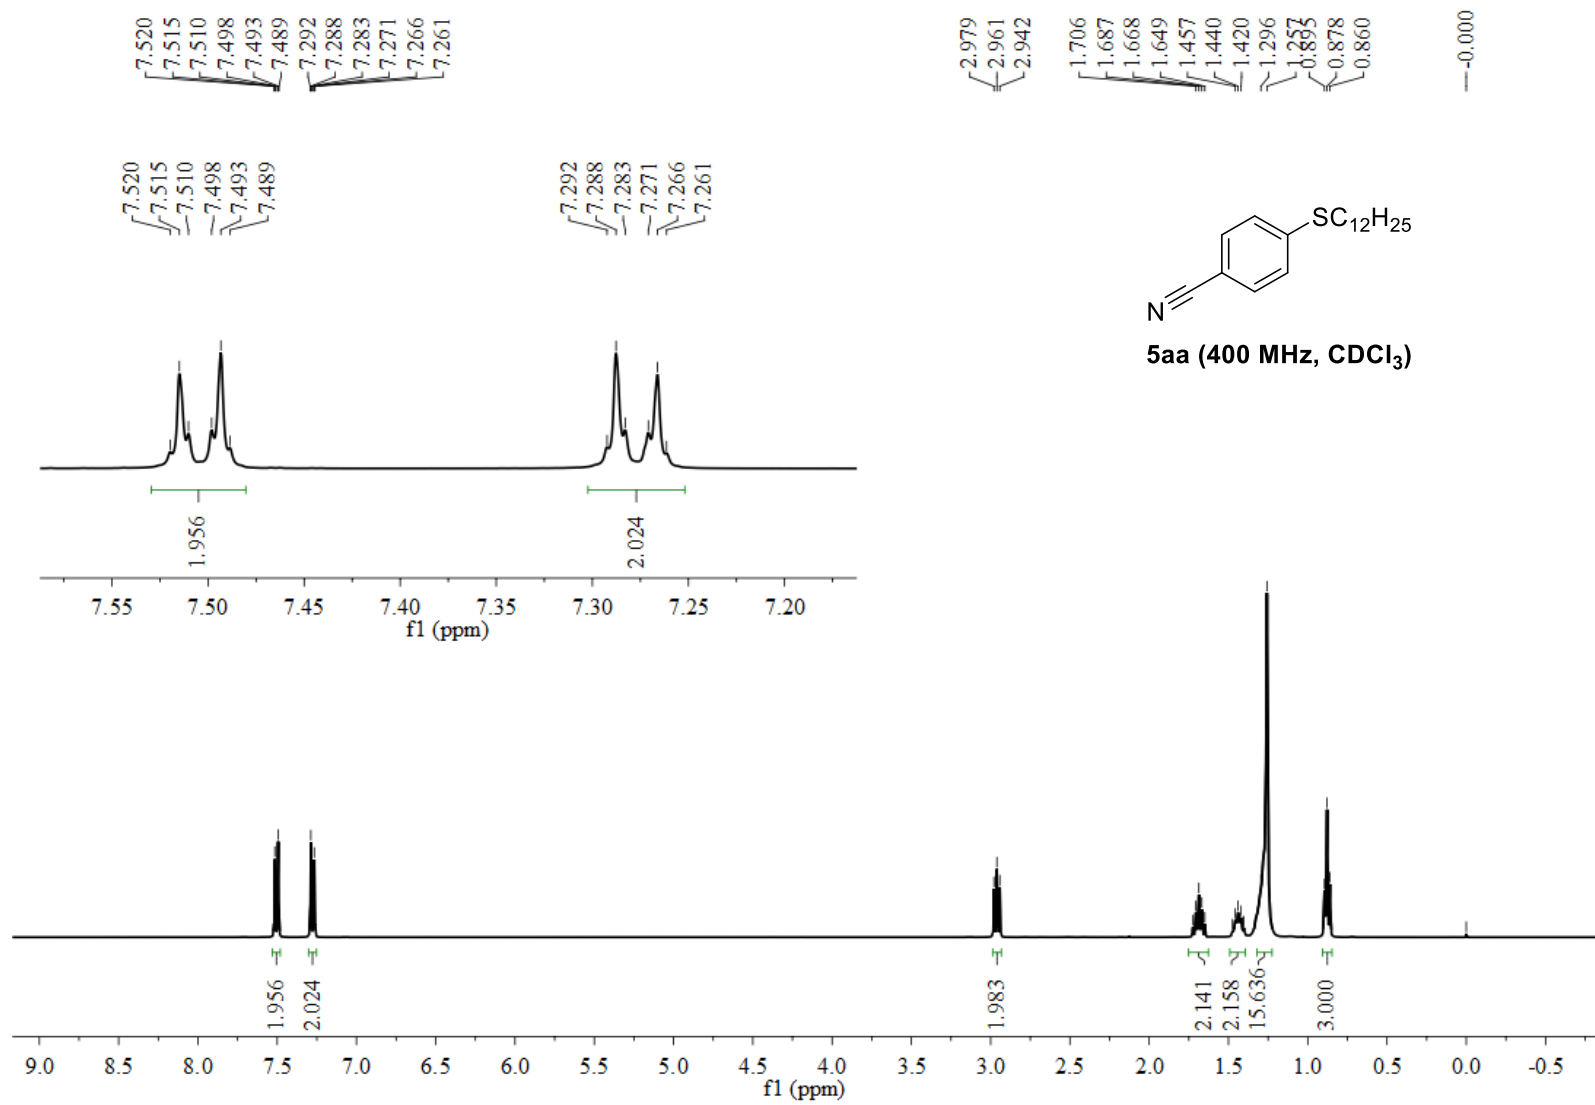

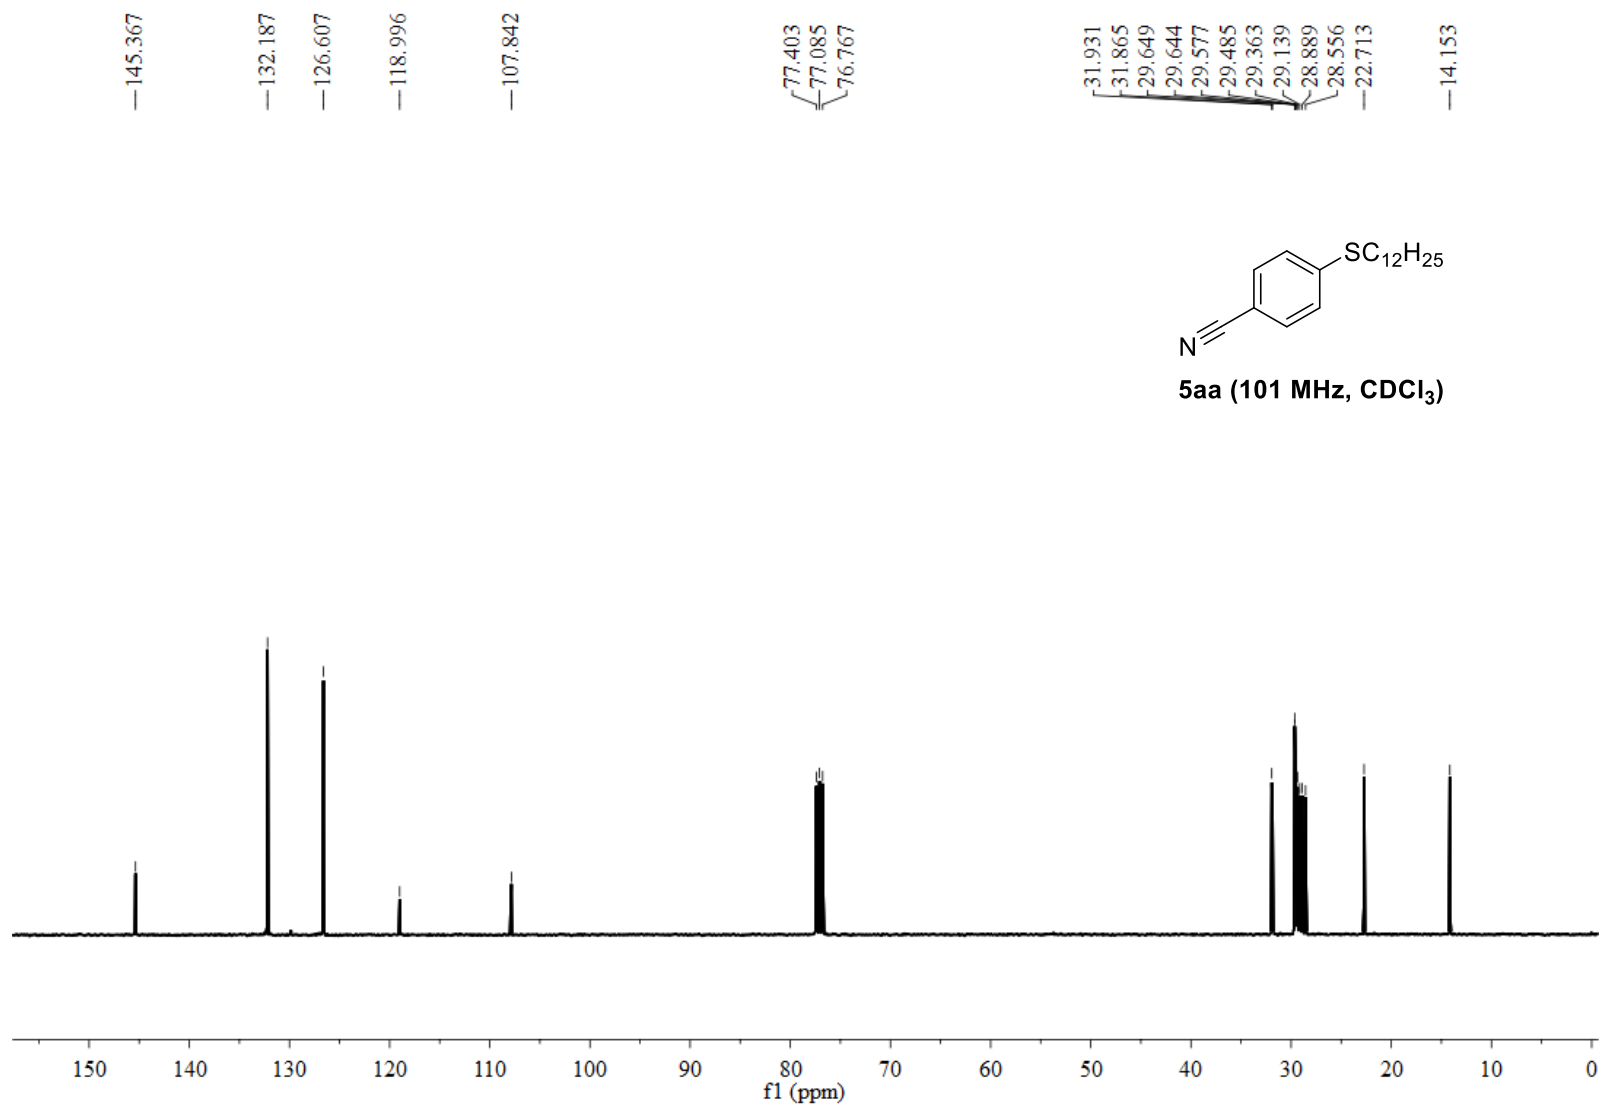

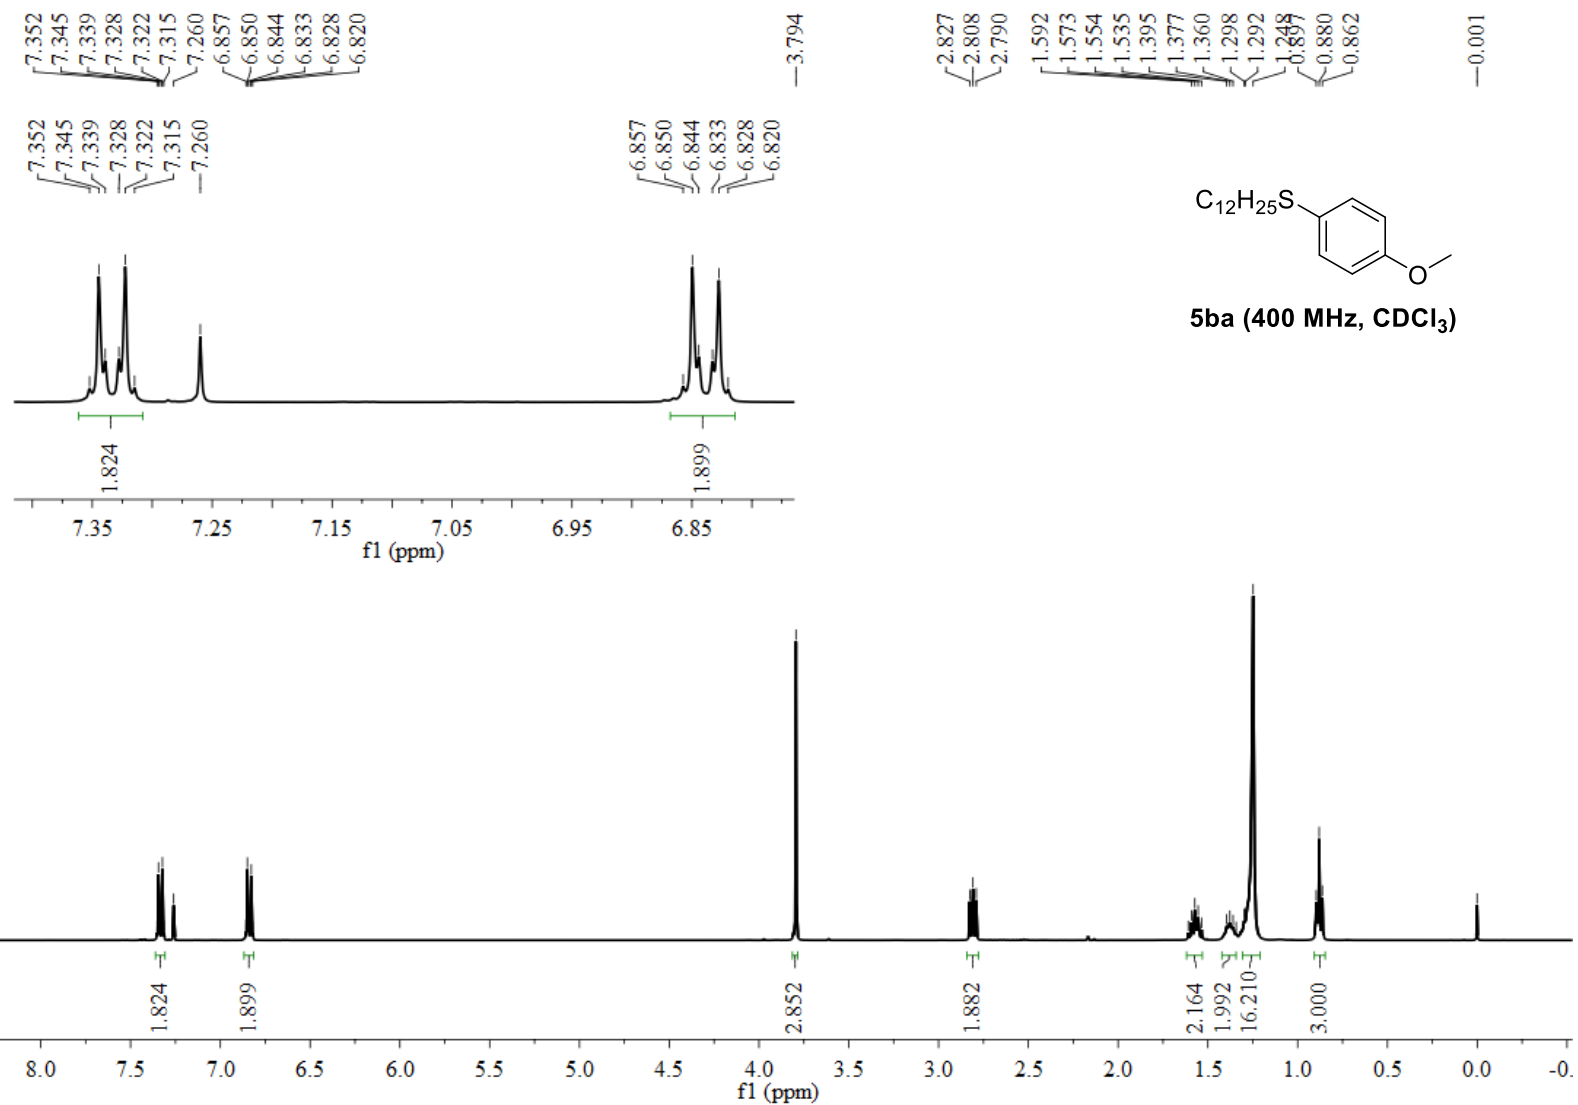

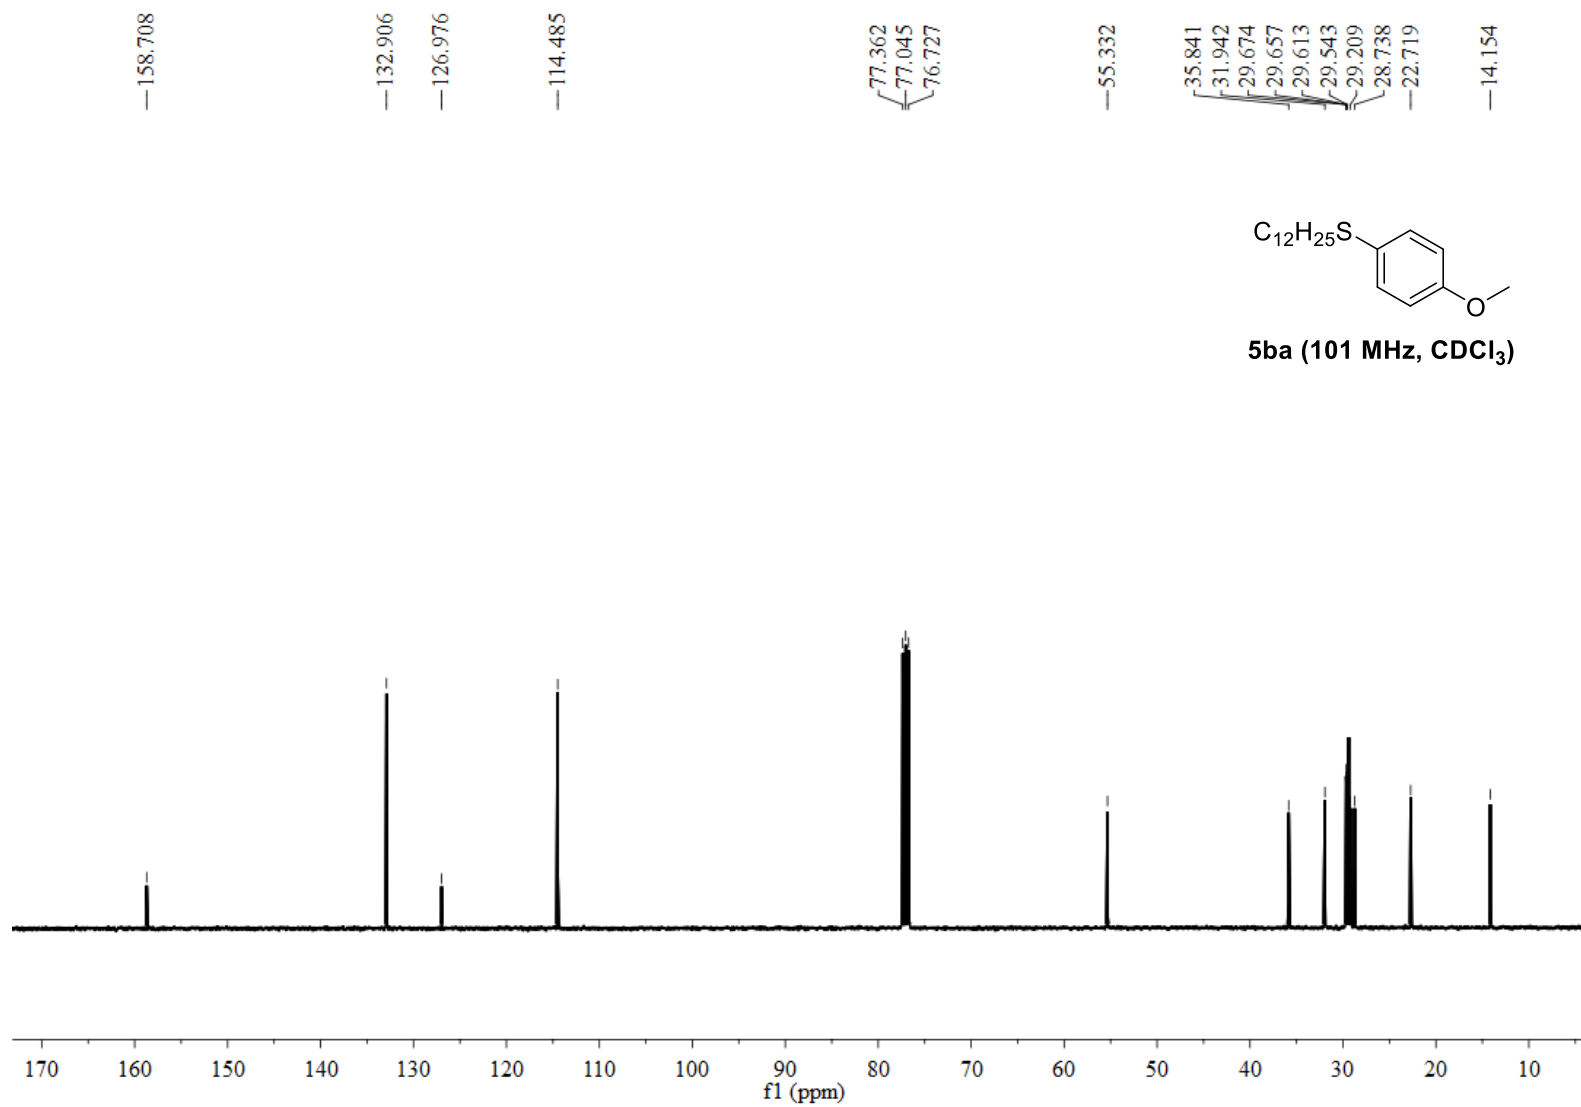

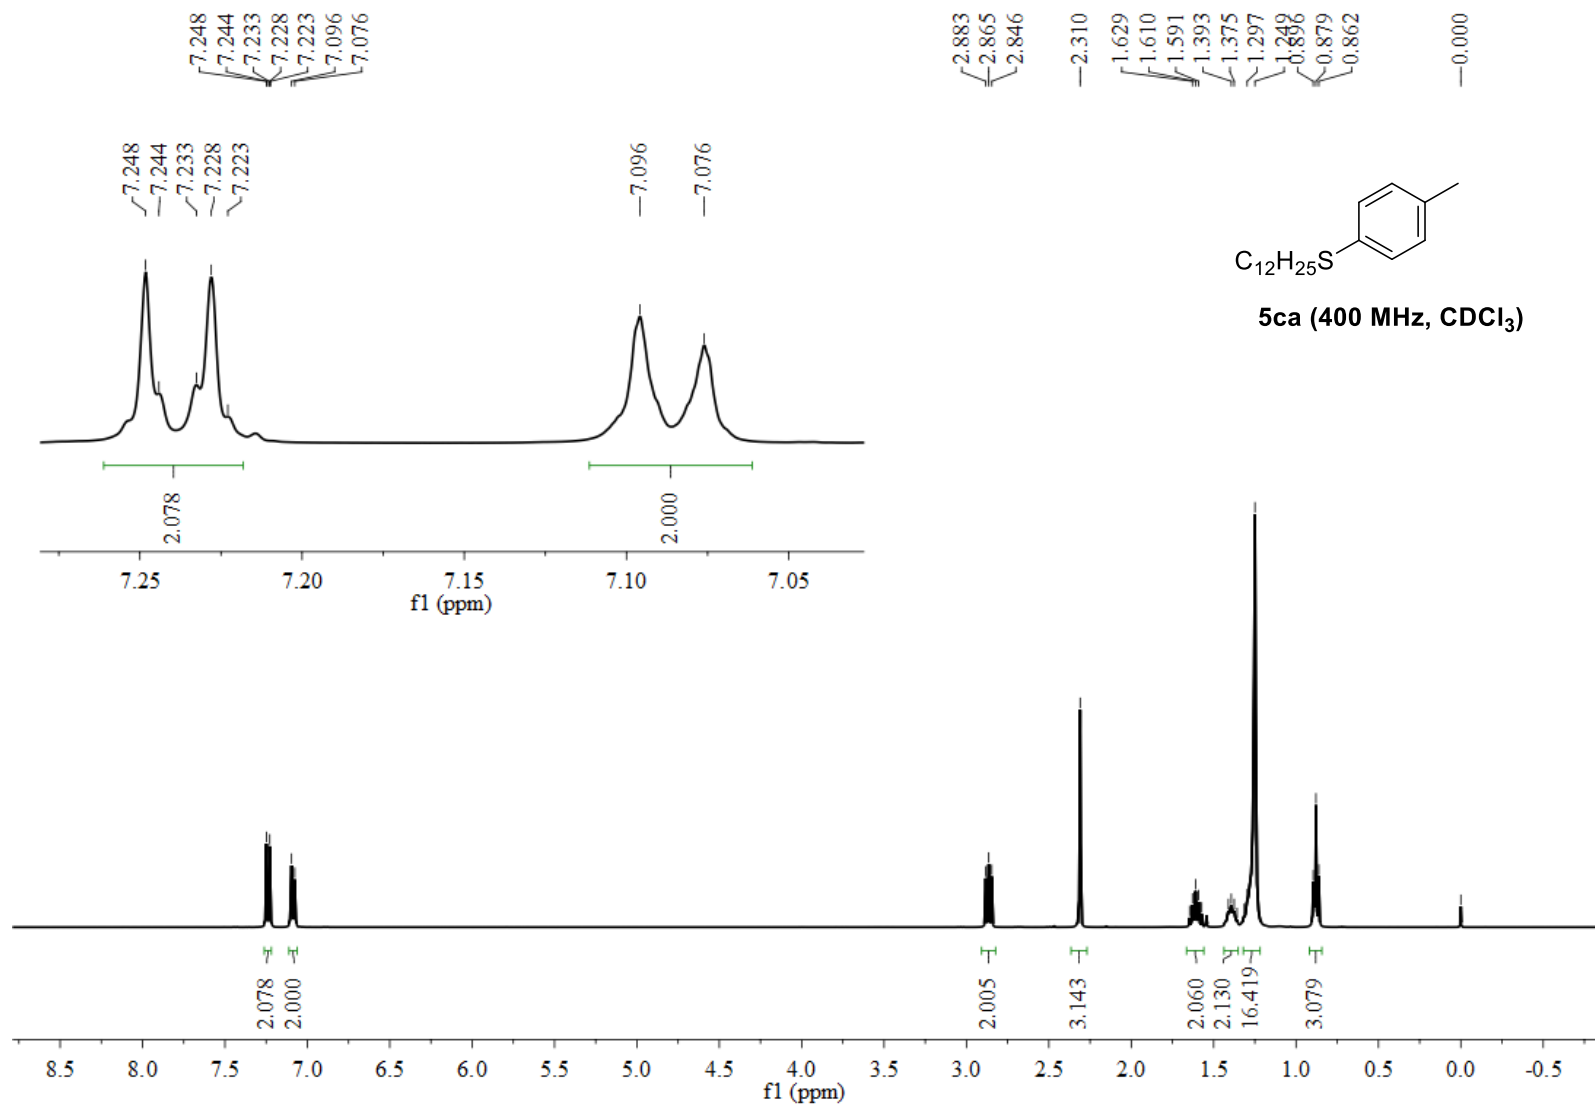



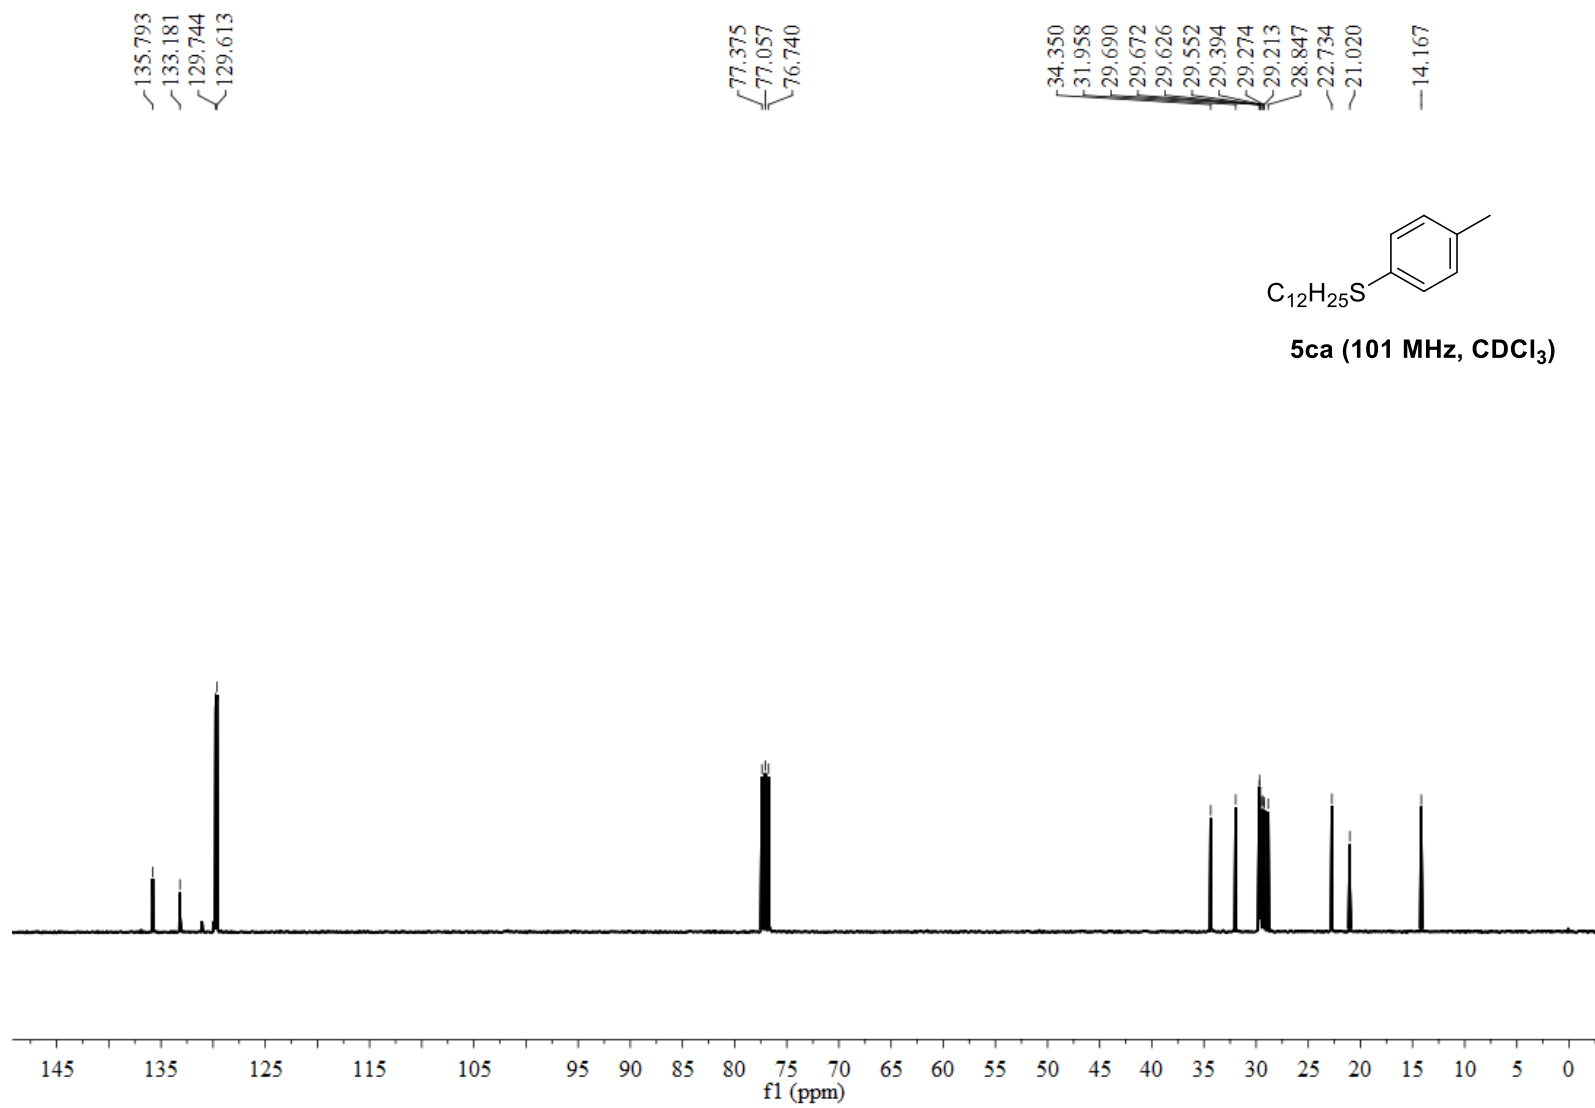

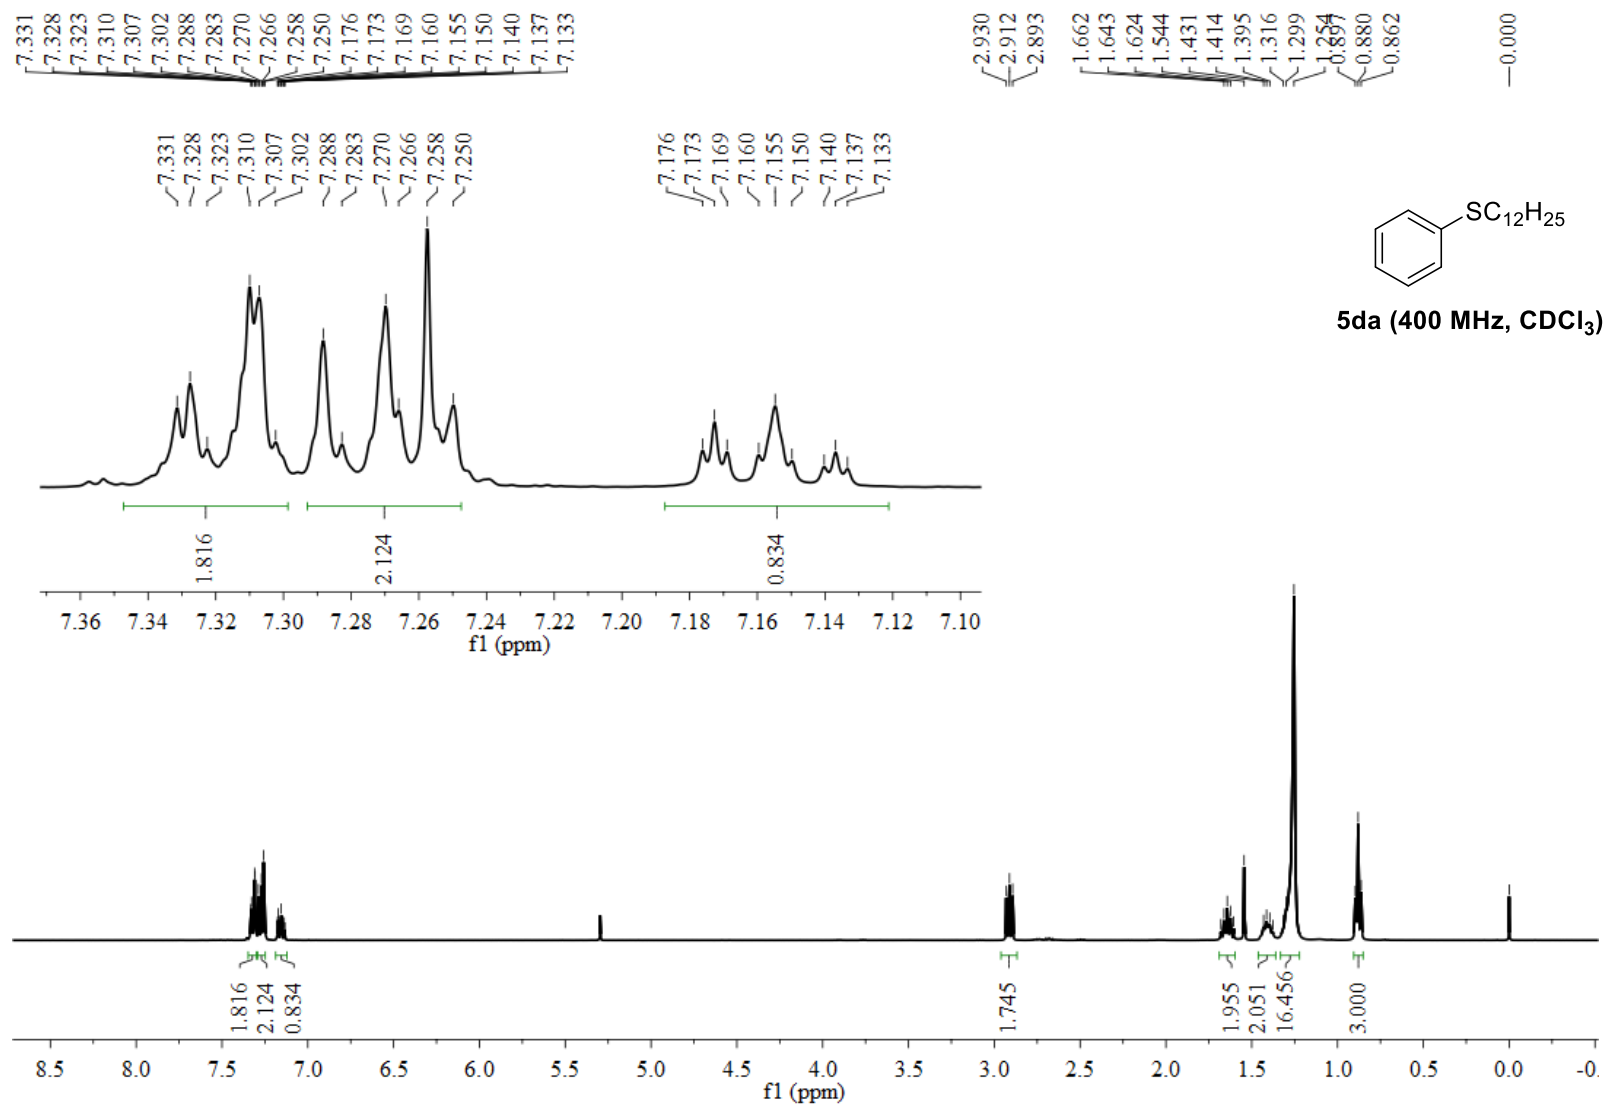

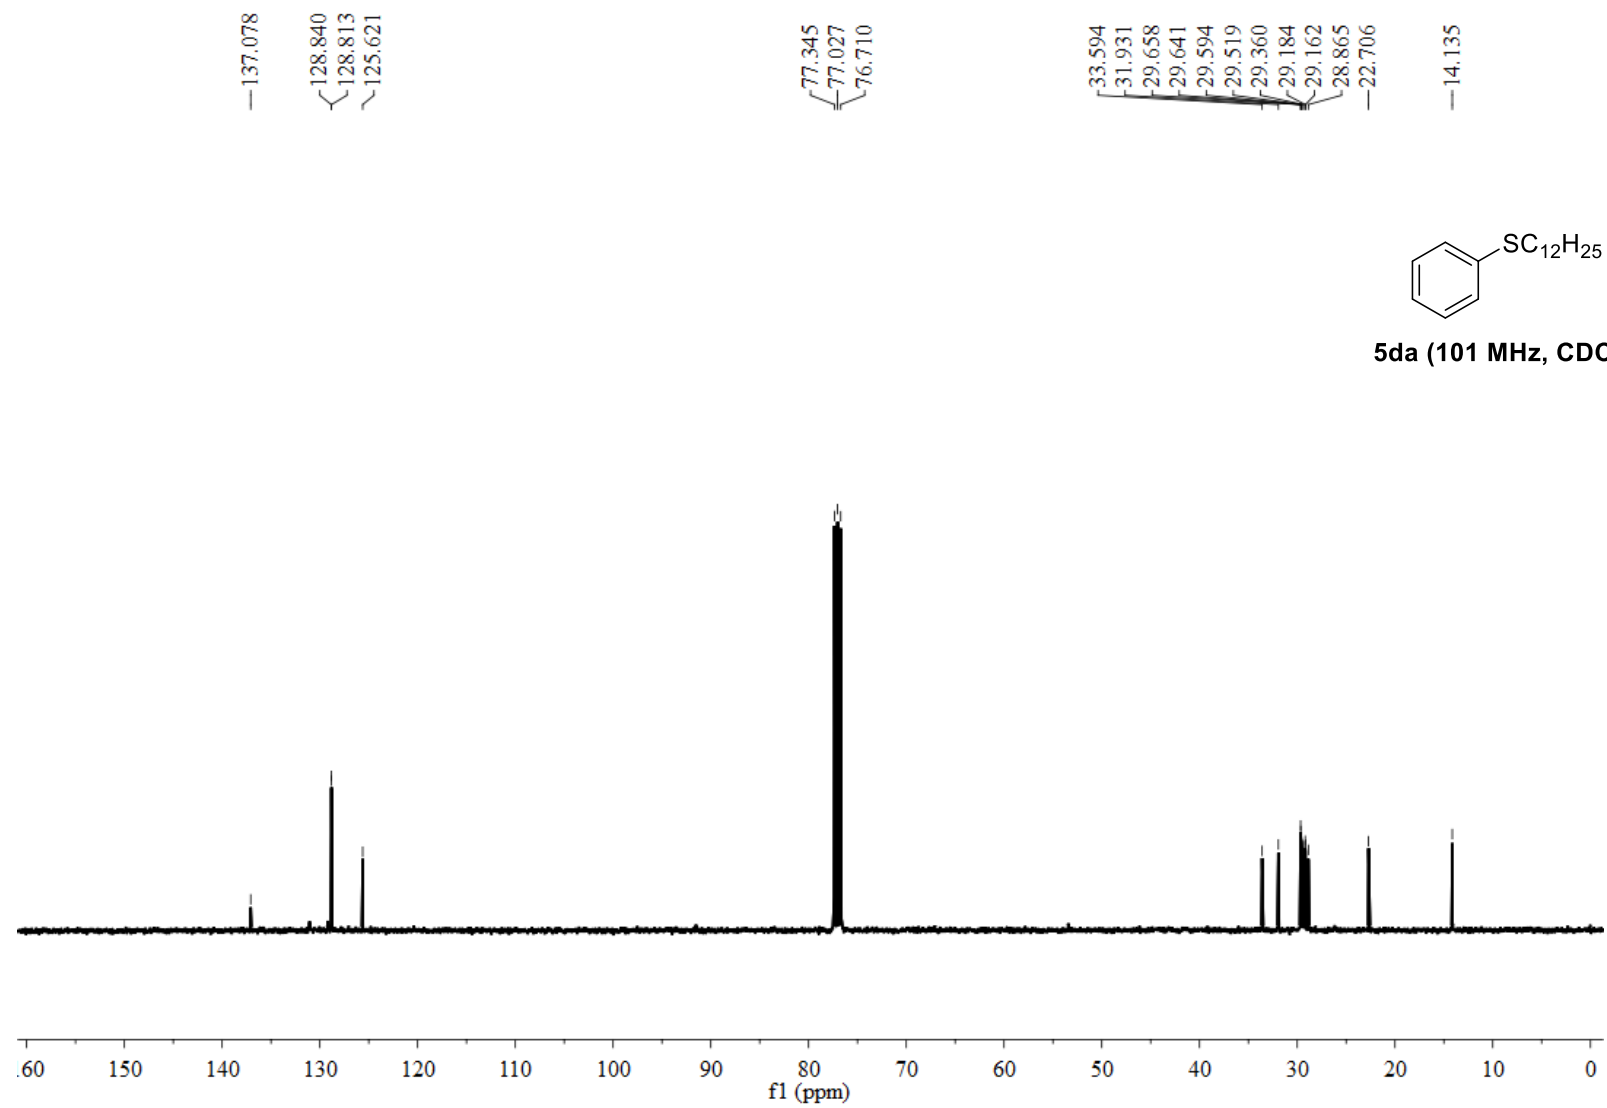

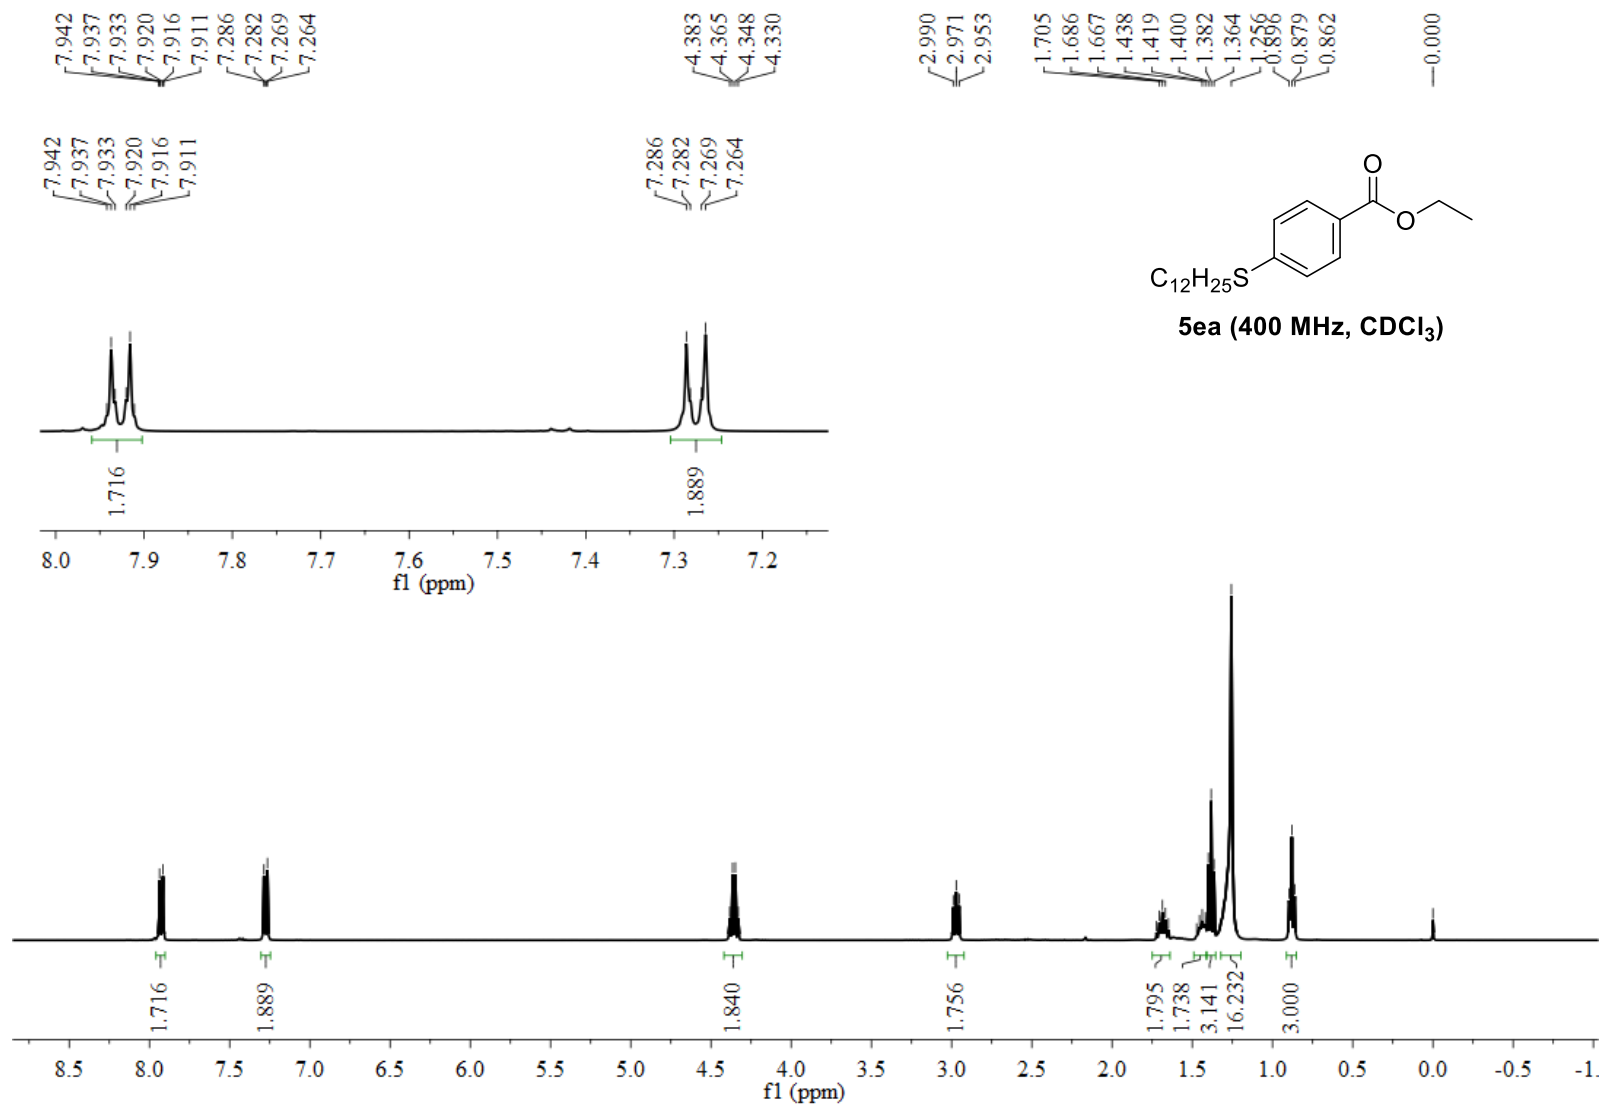

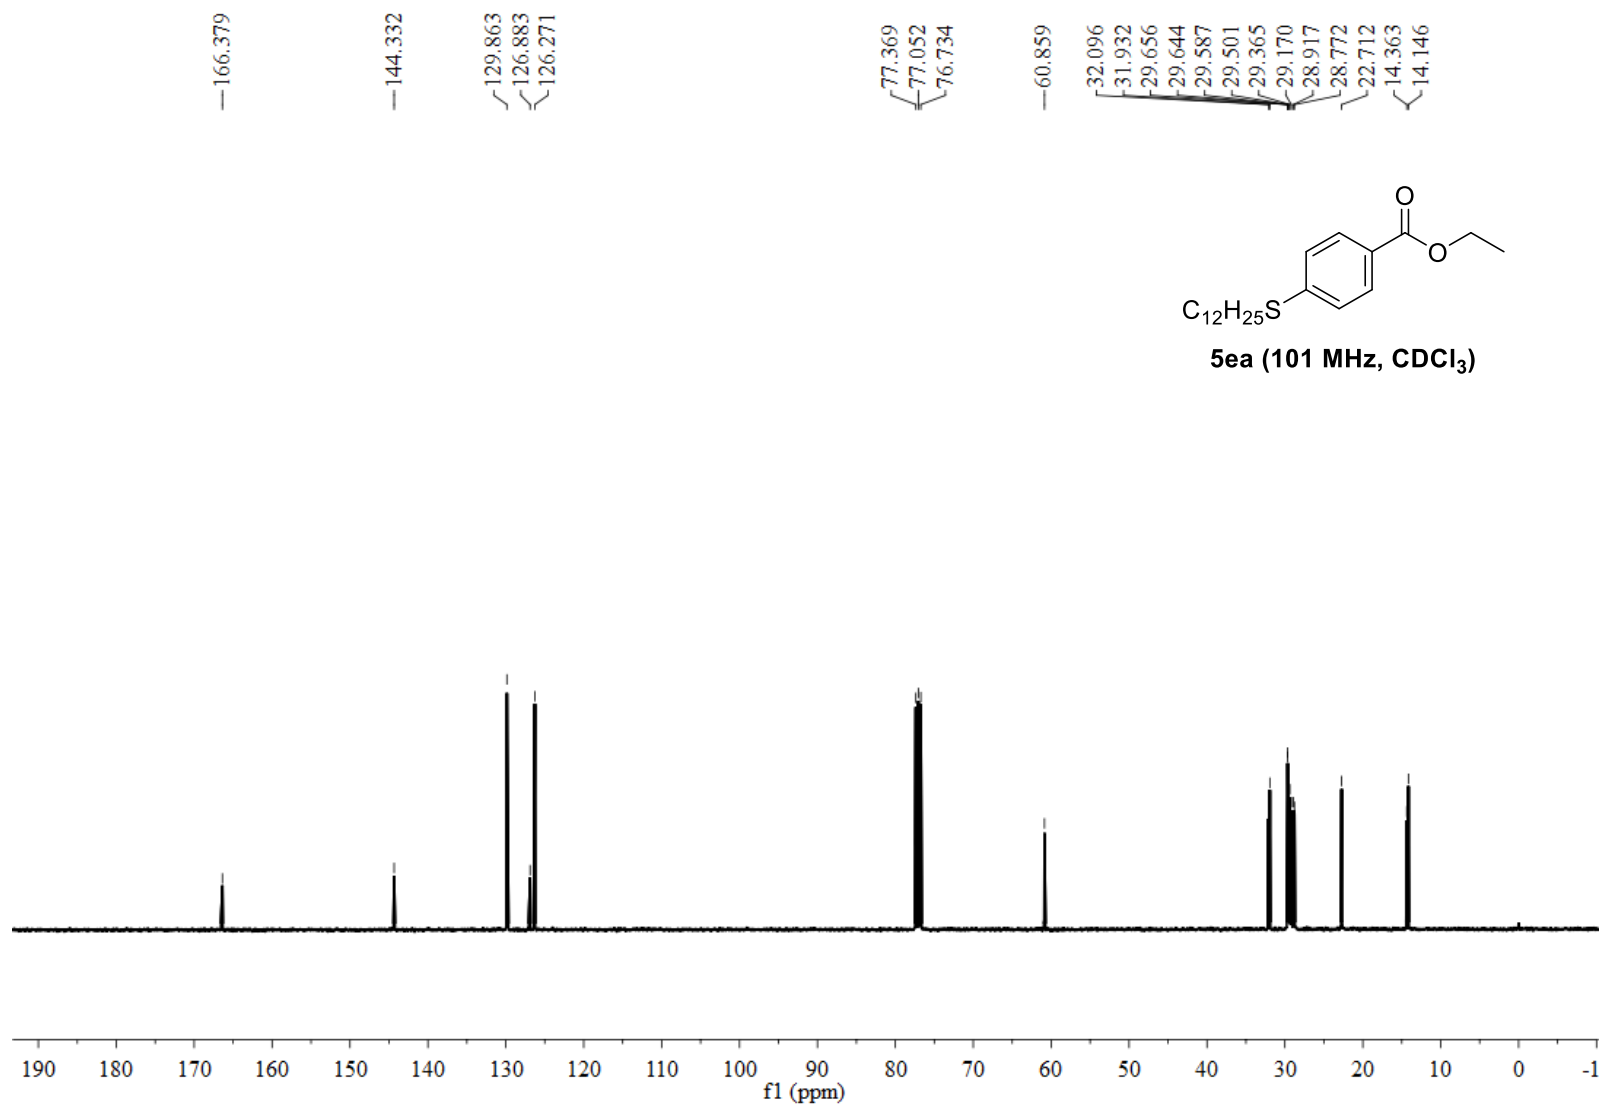

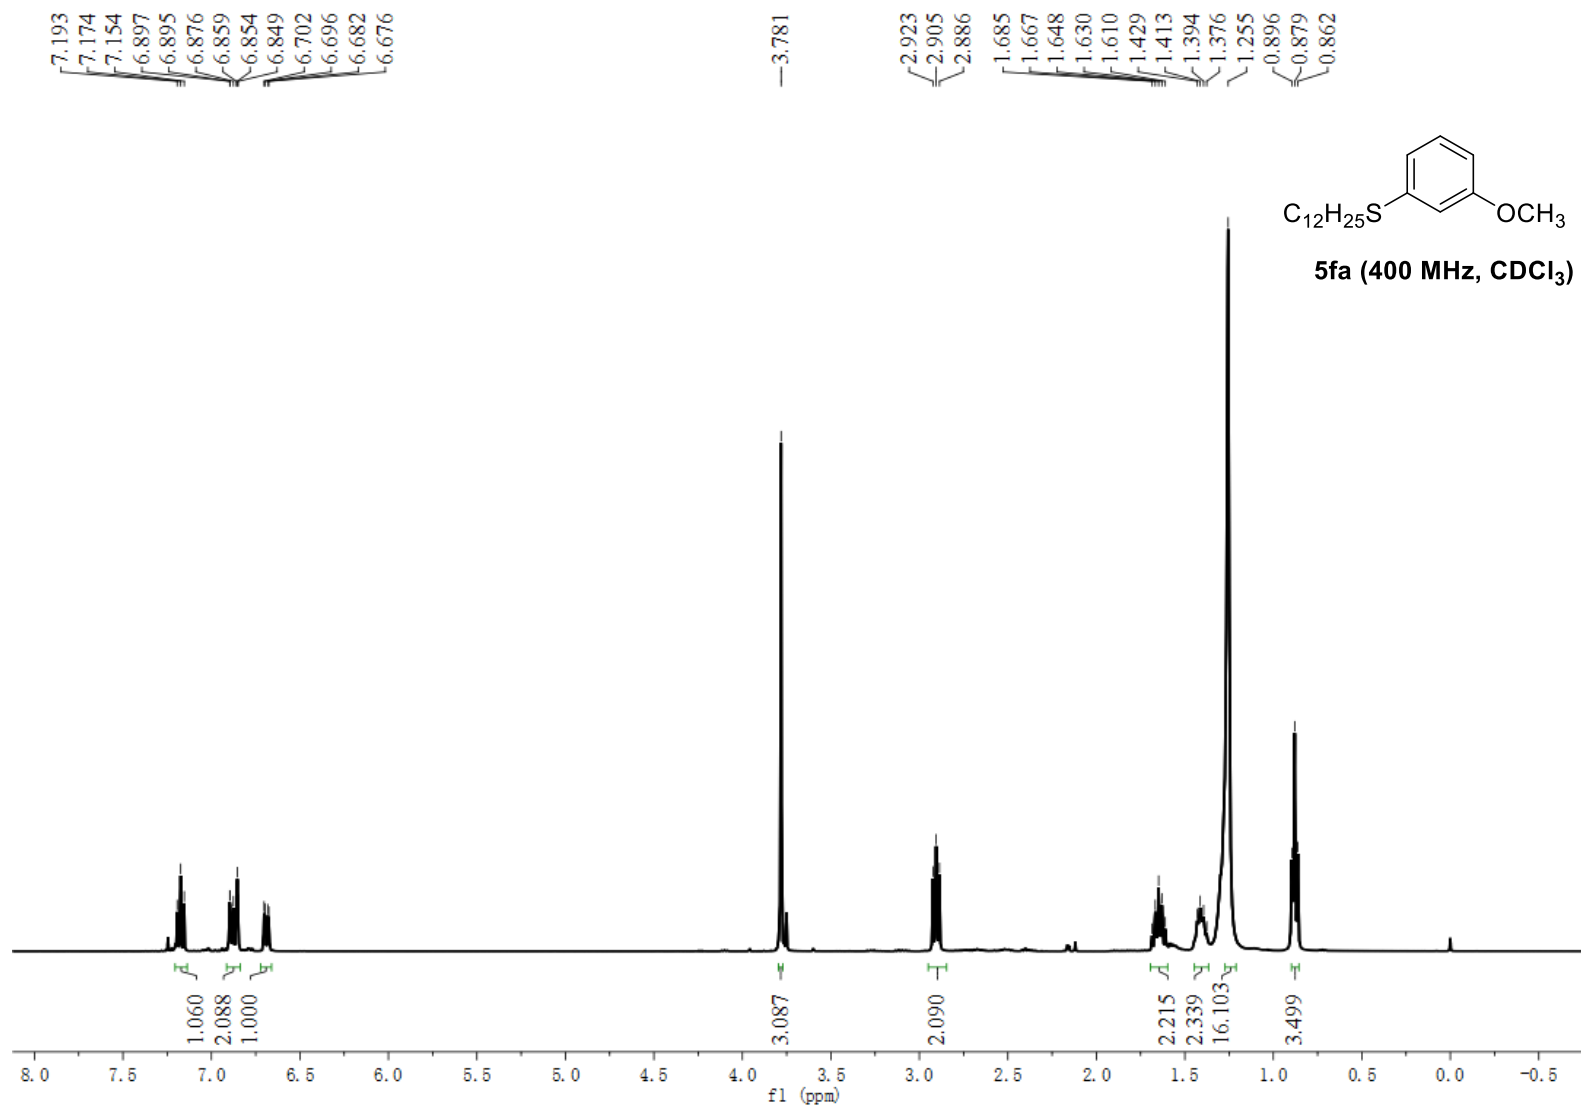

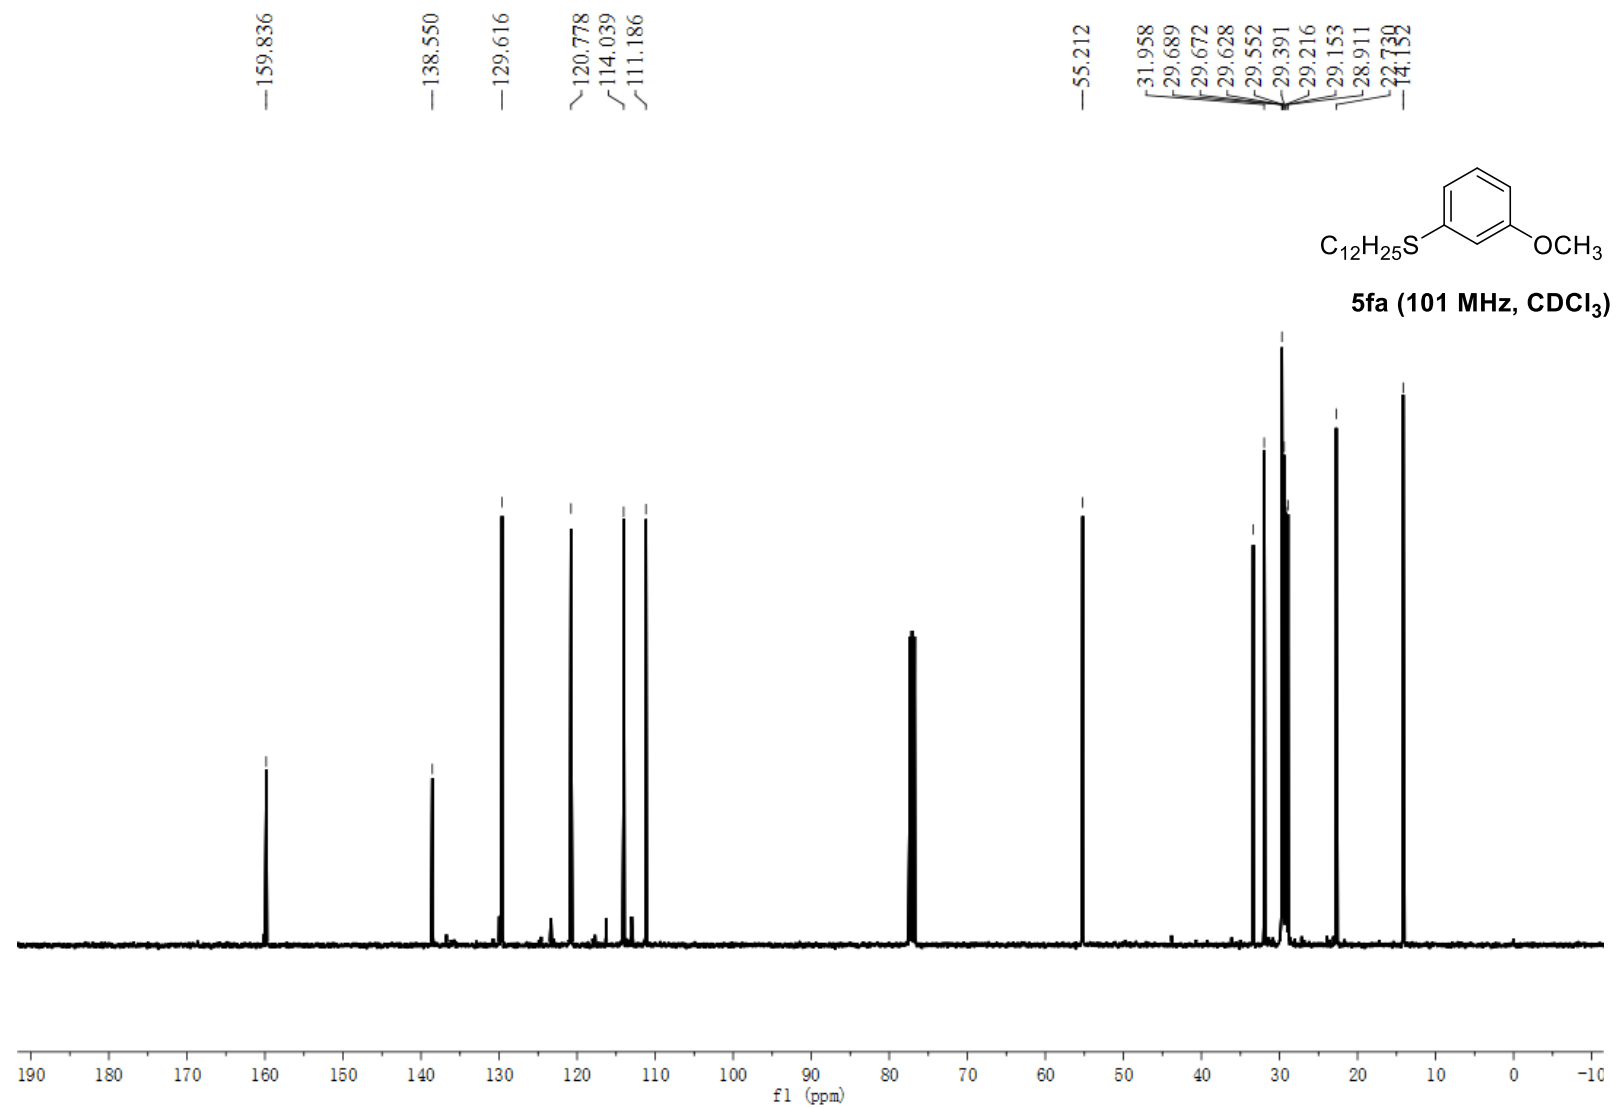

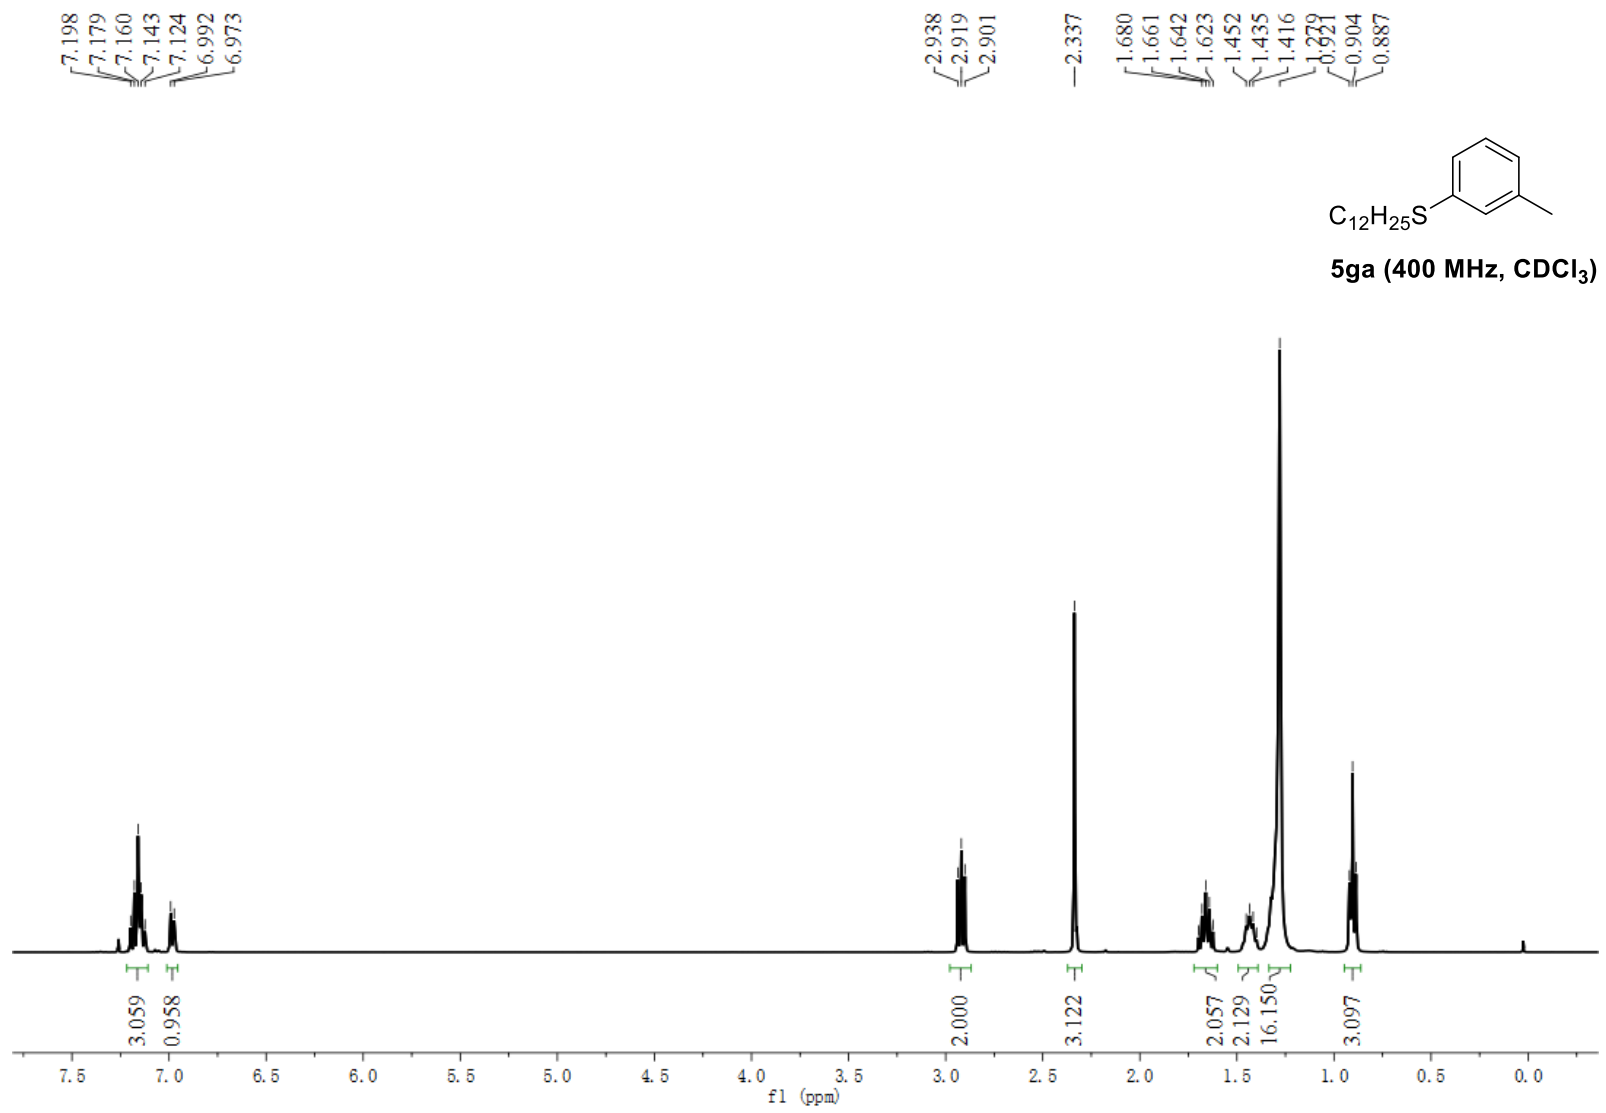



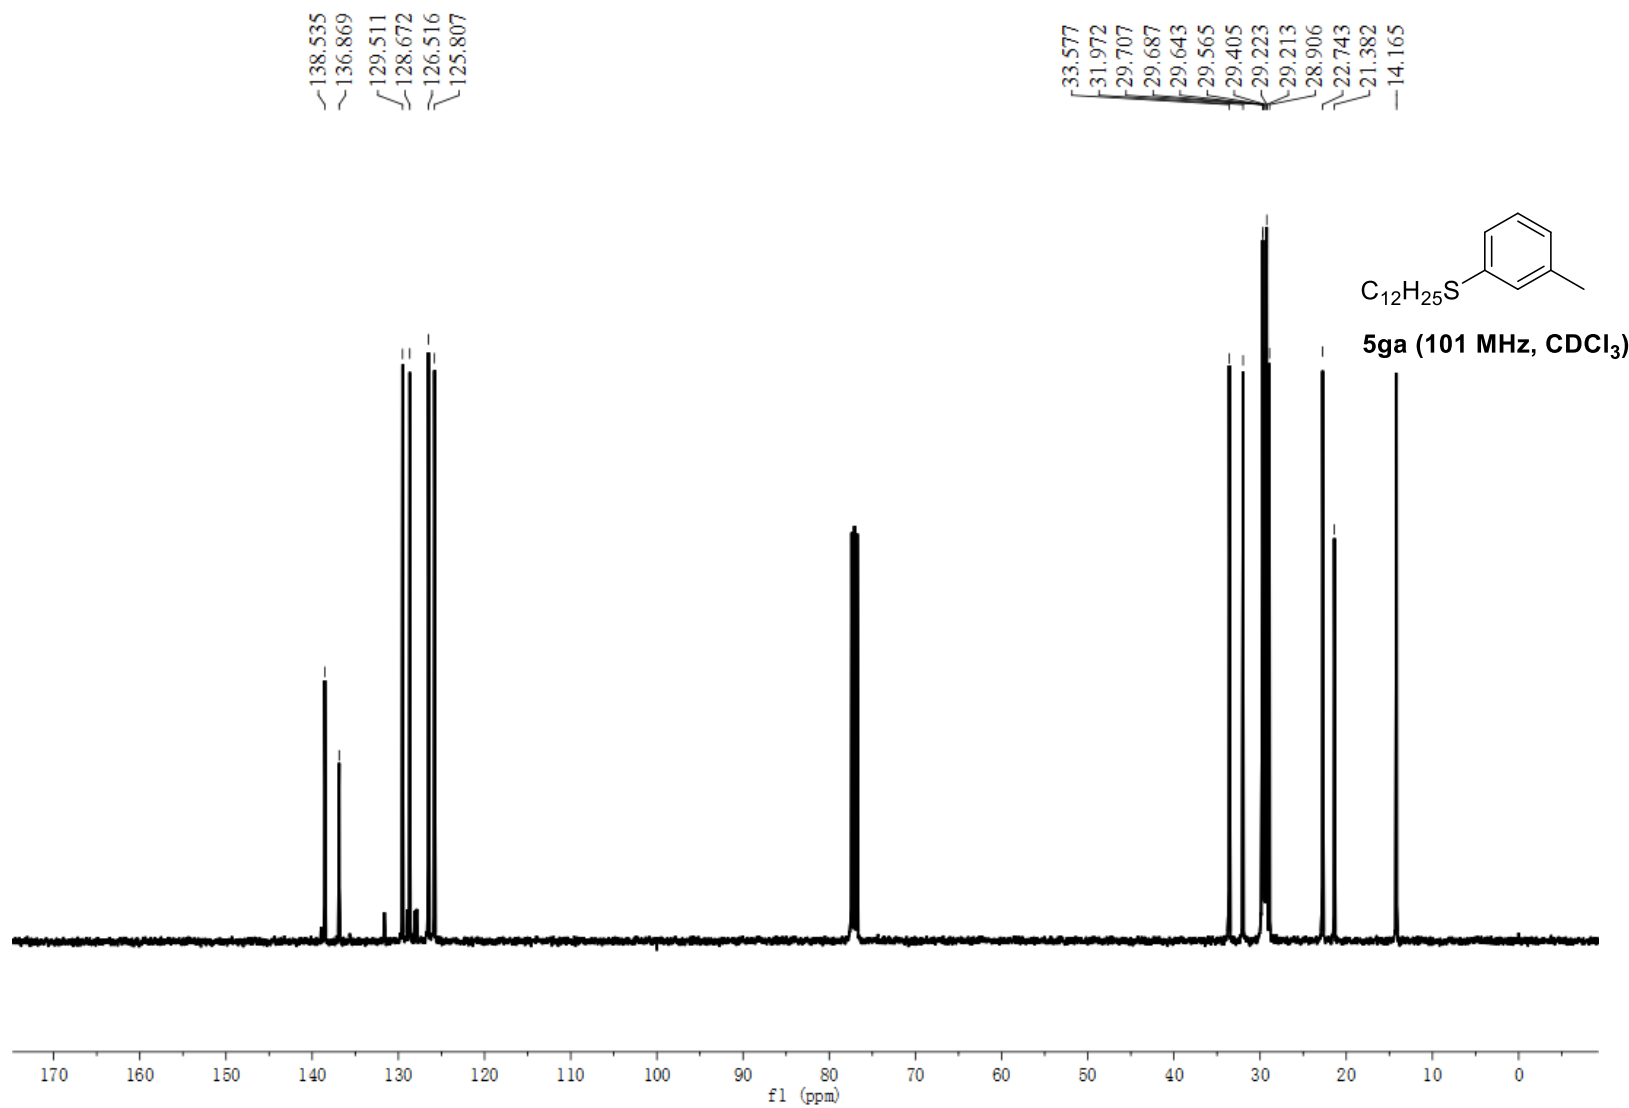

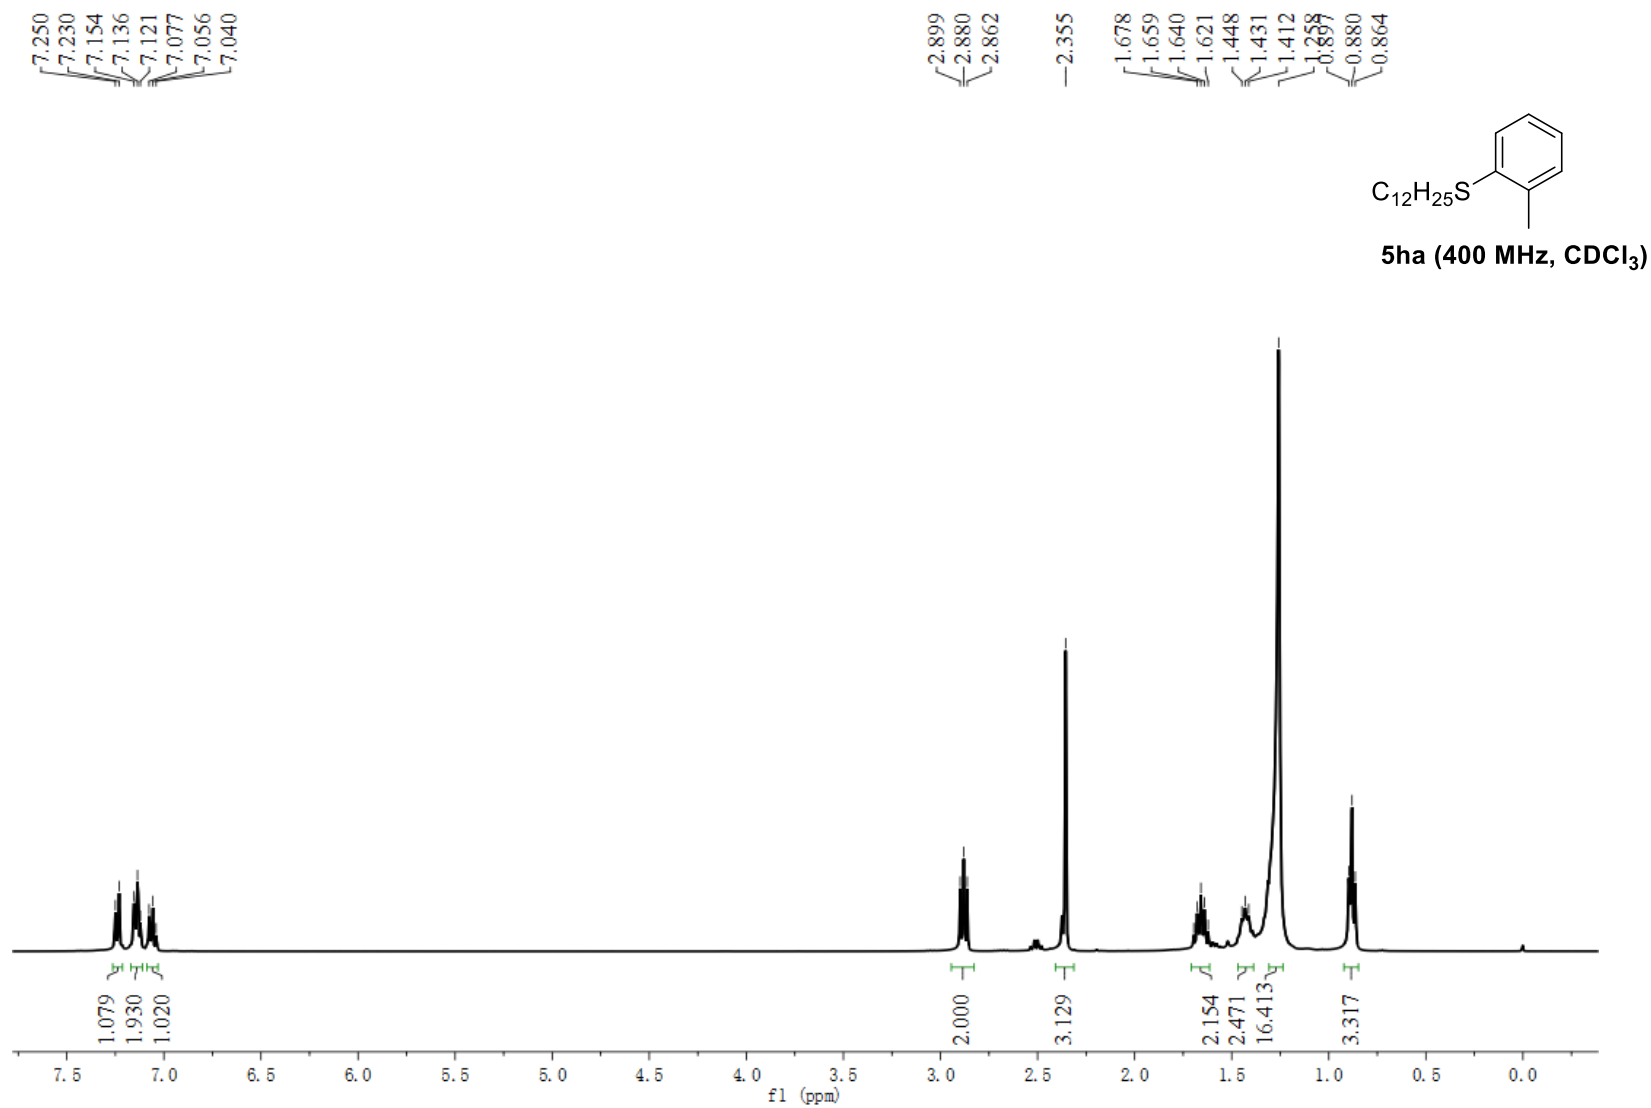

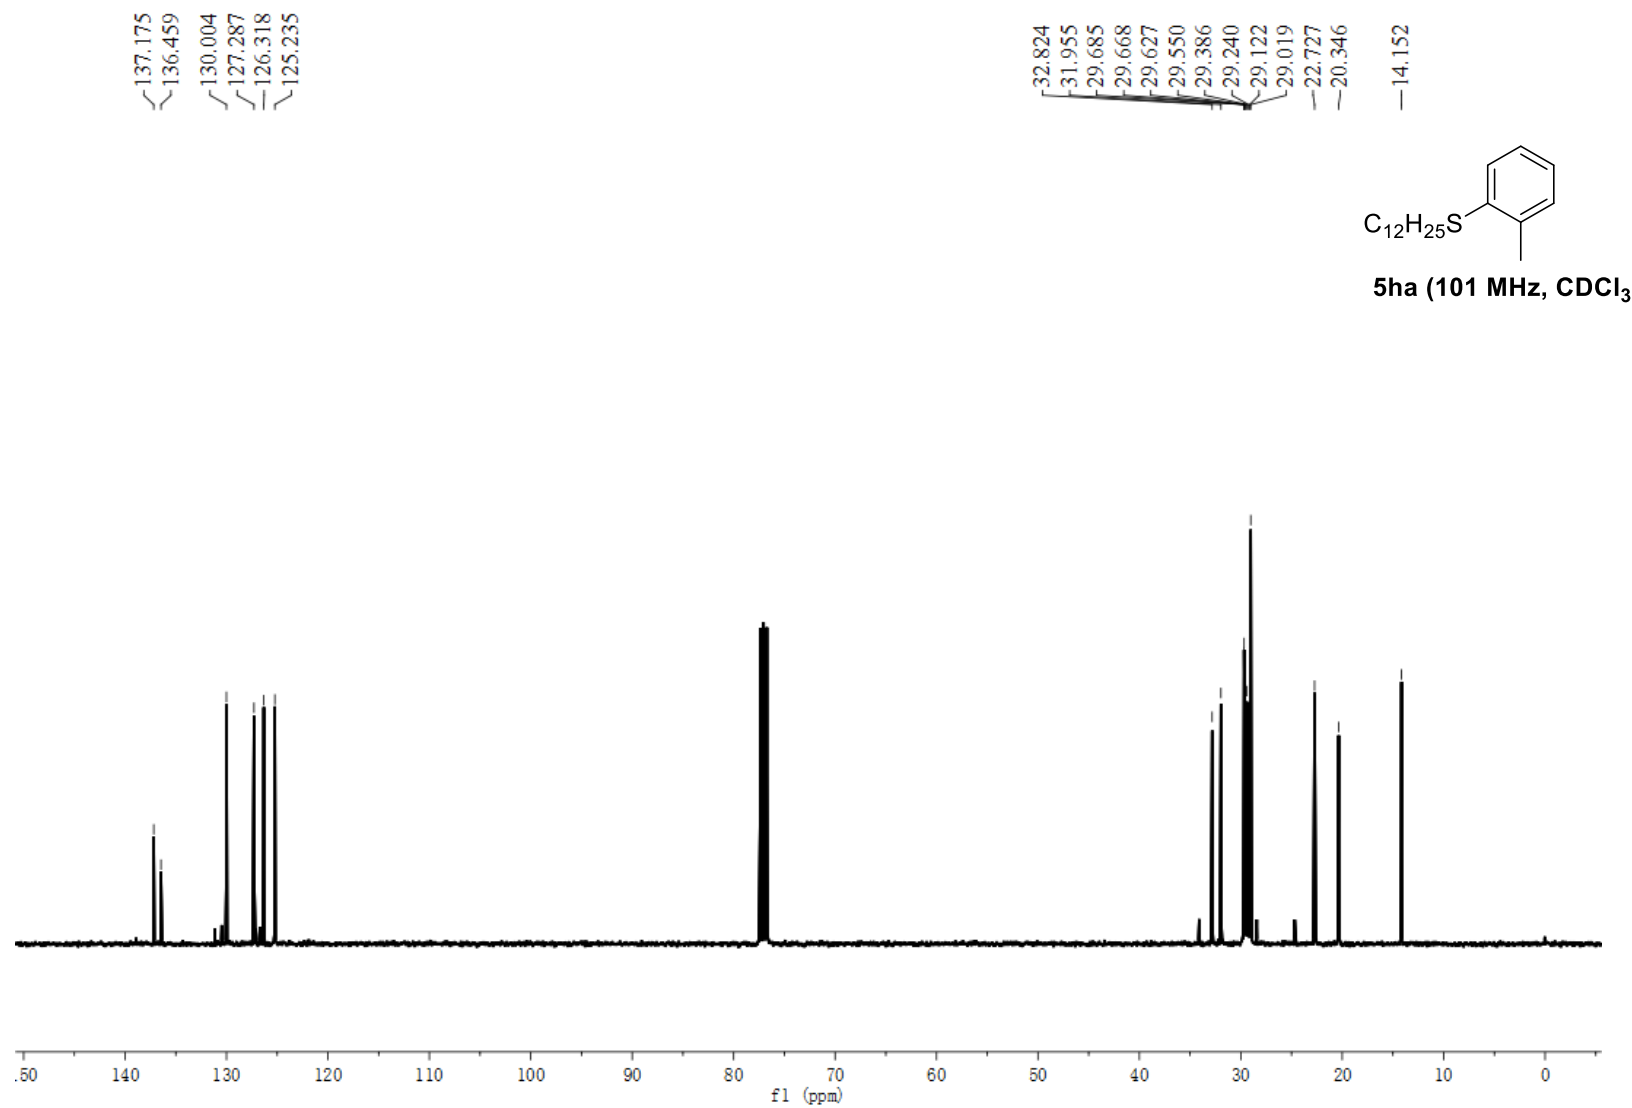



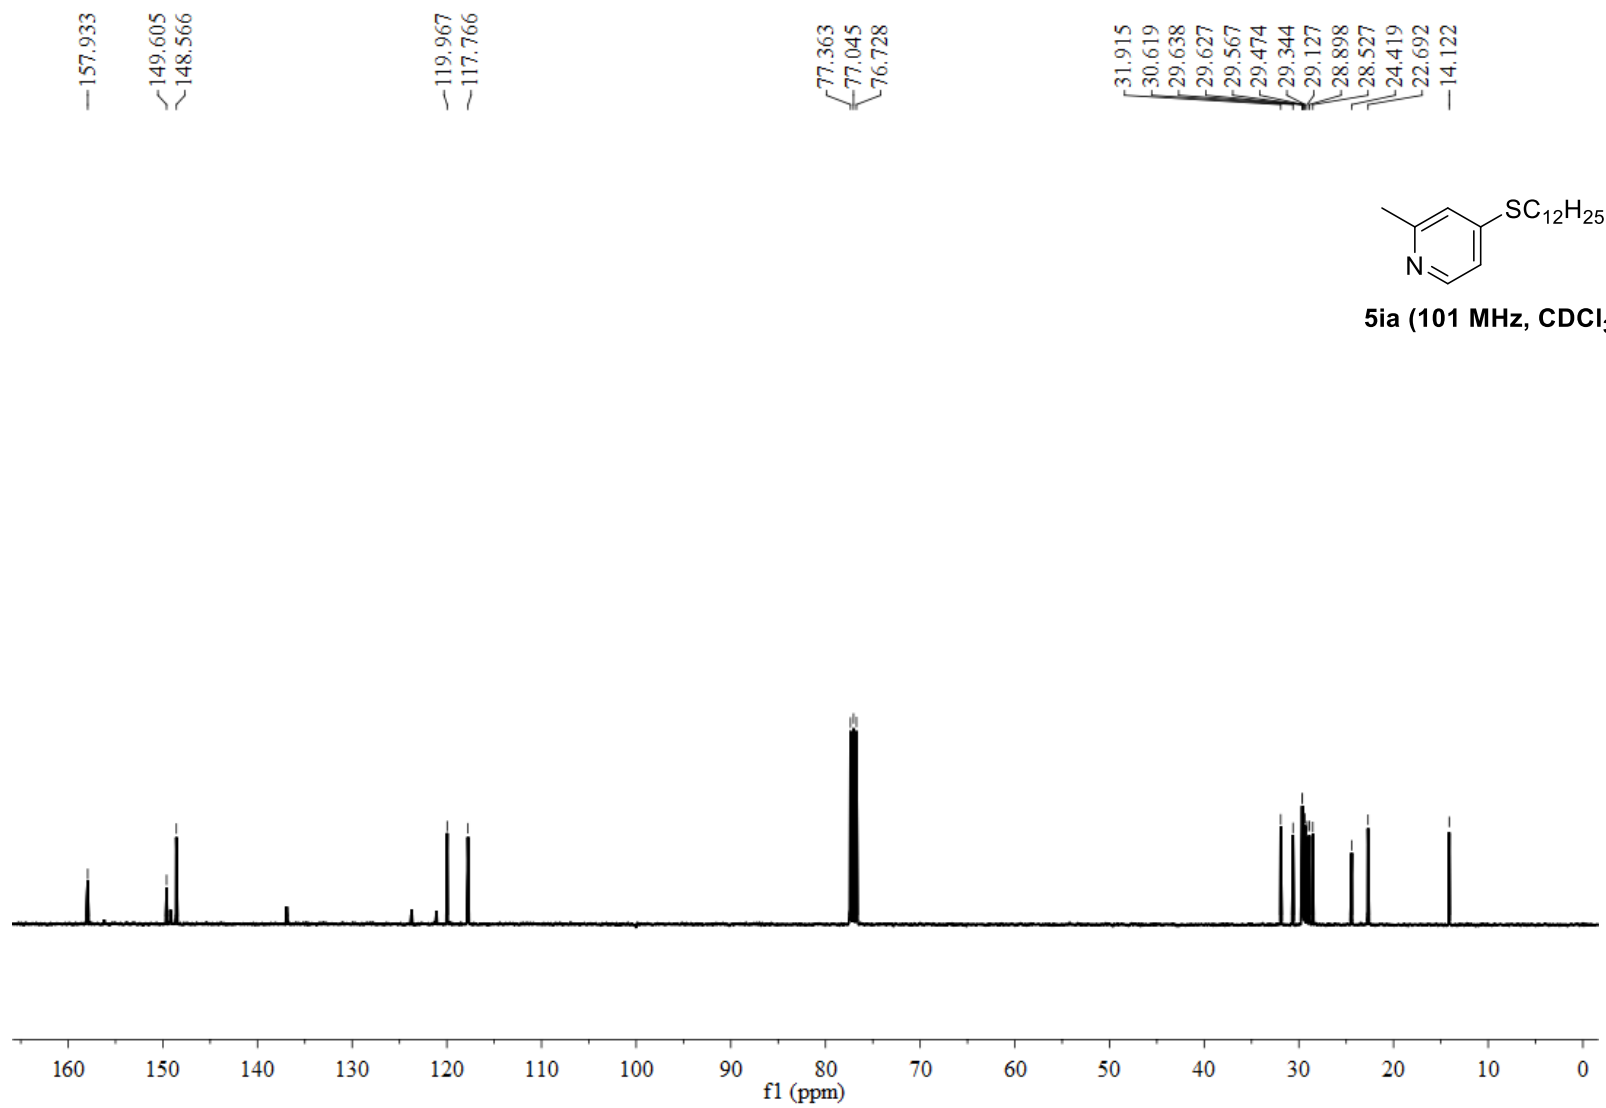

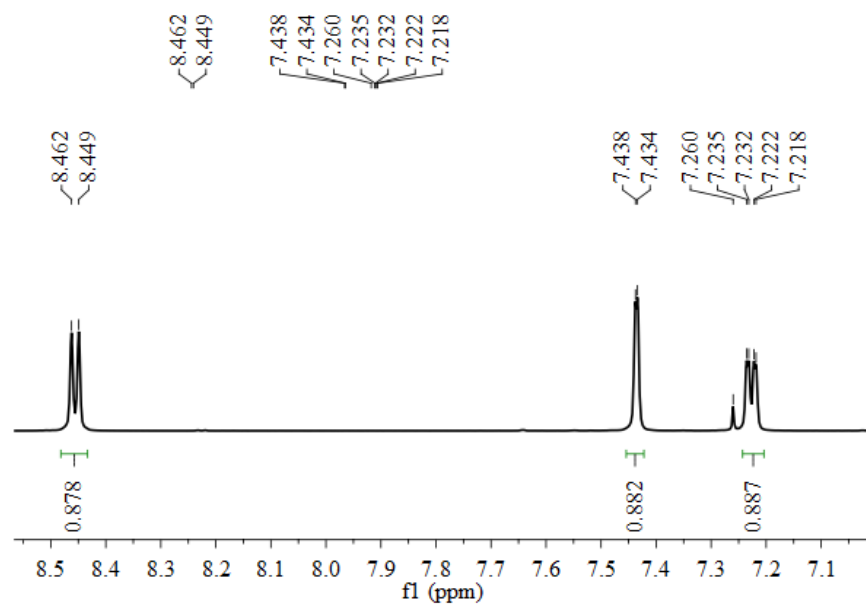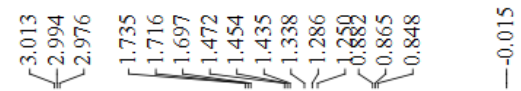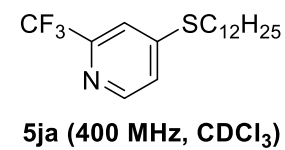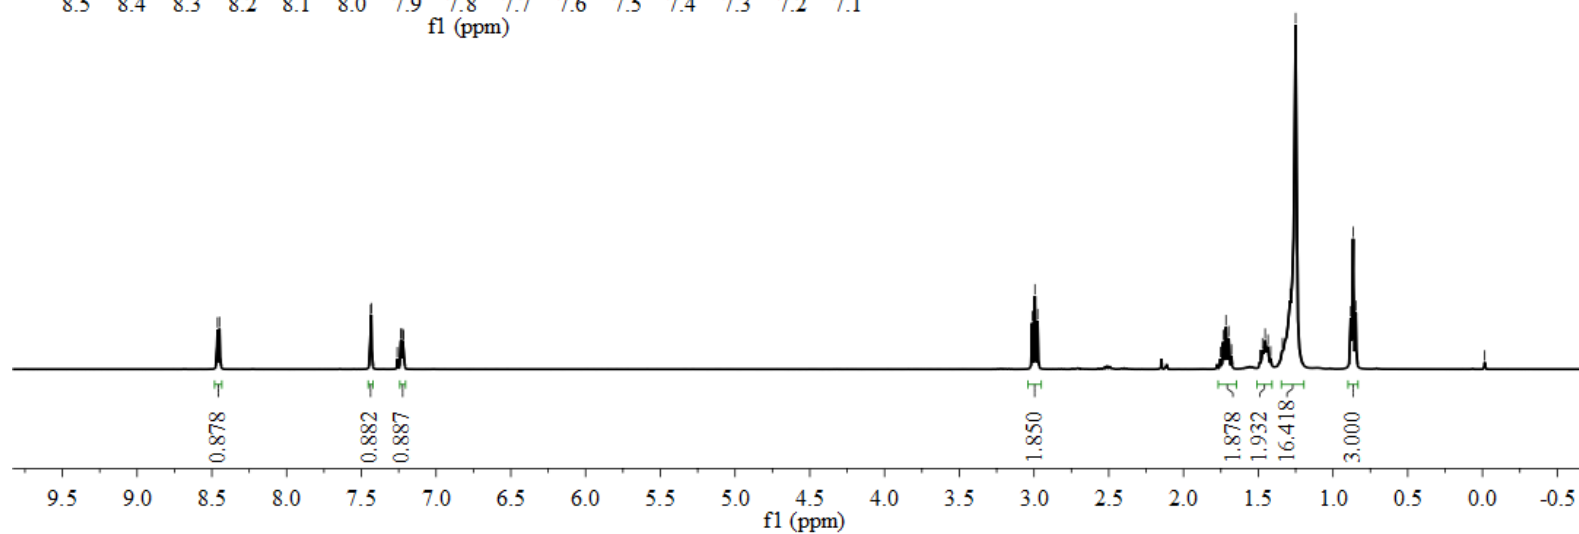

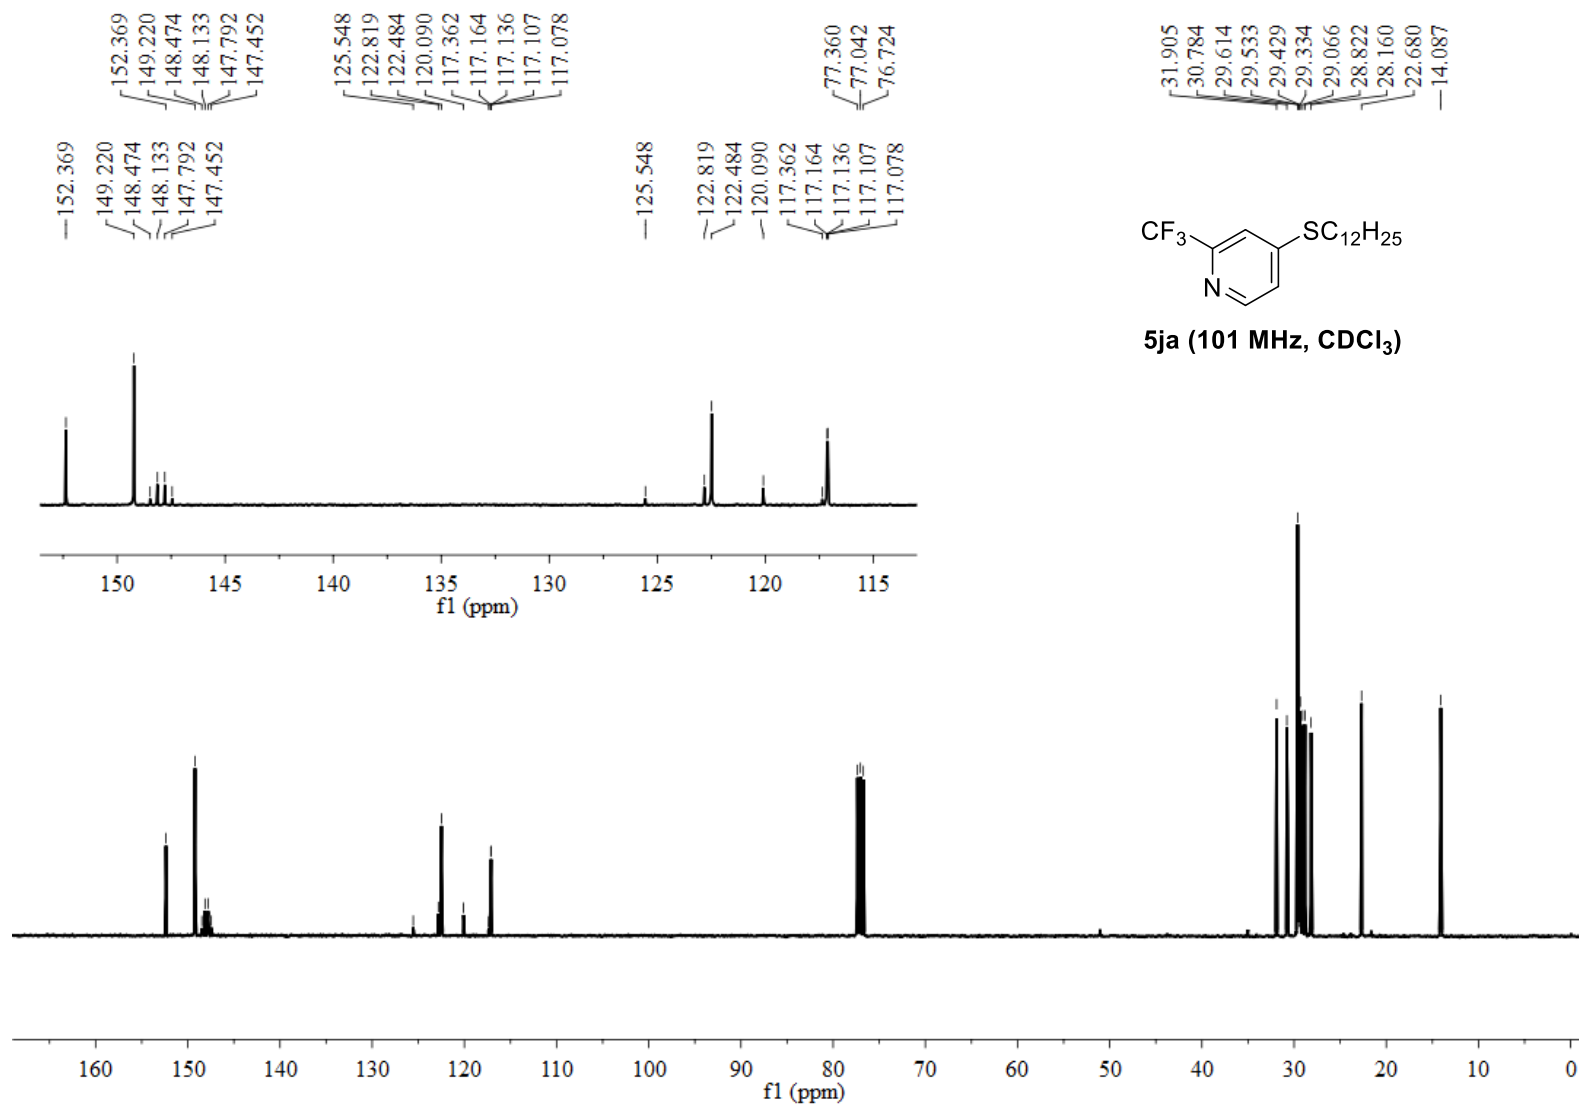

--68.321

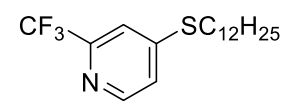

**5ja (376 MHz, CDCl<sub>3</sub>)**

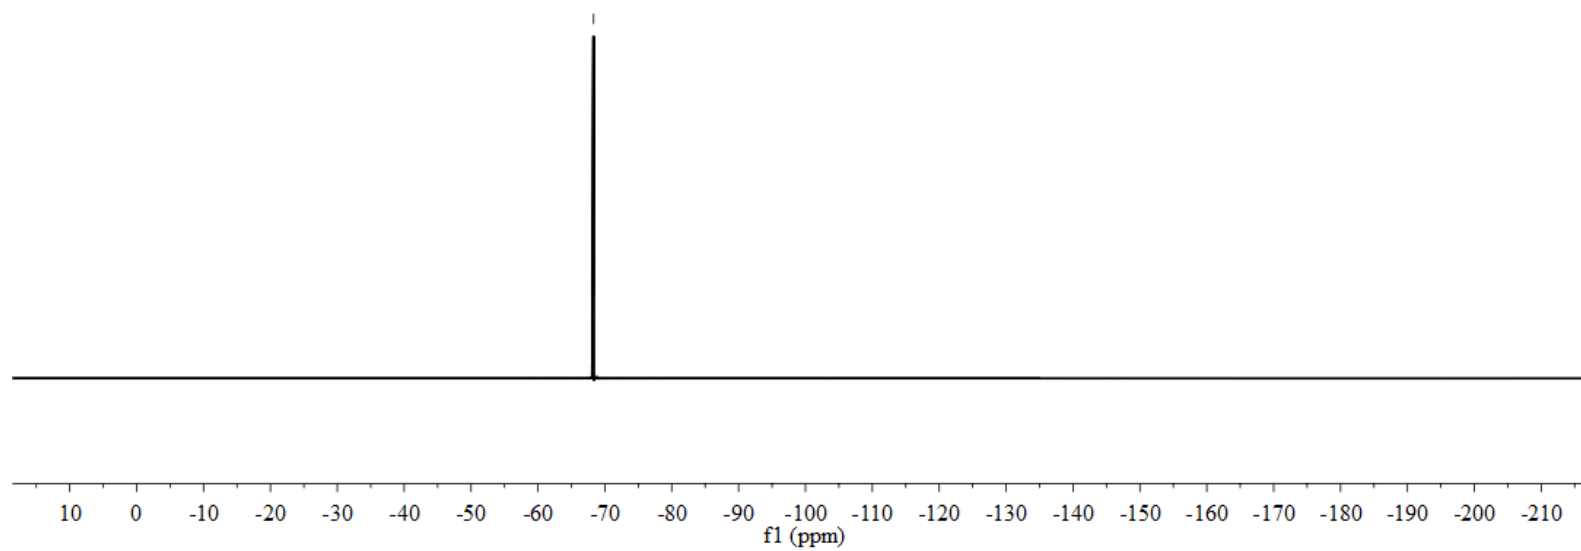



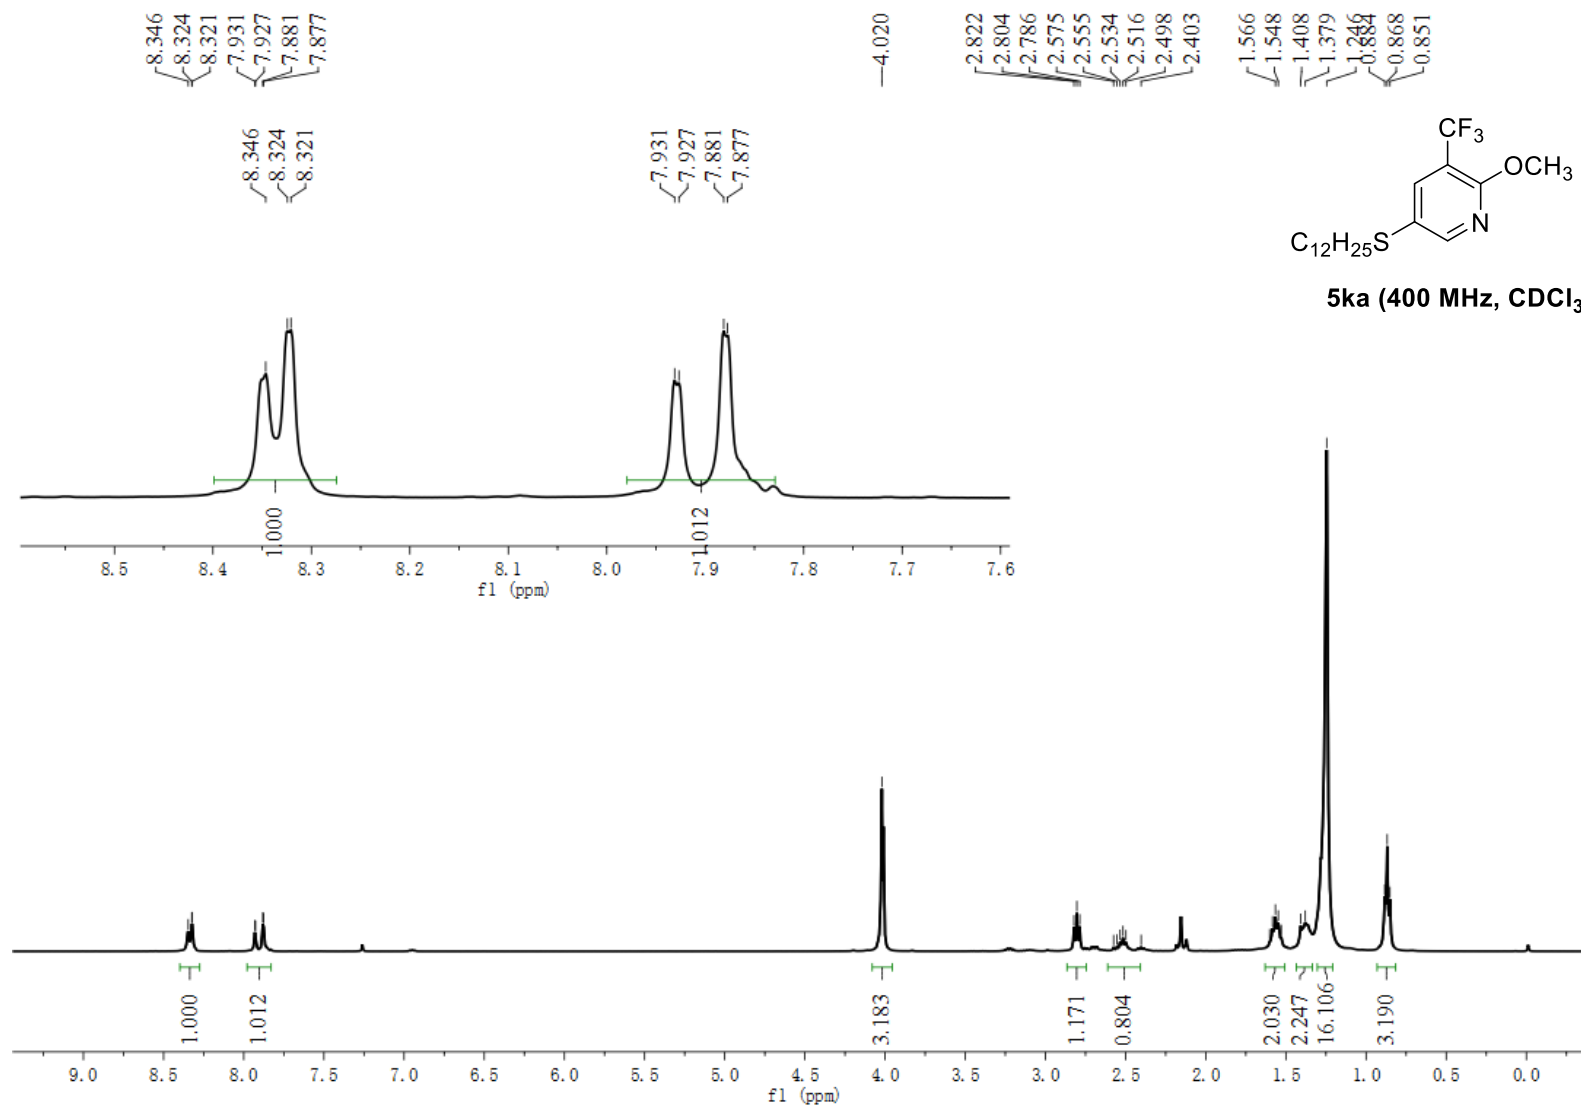

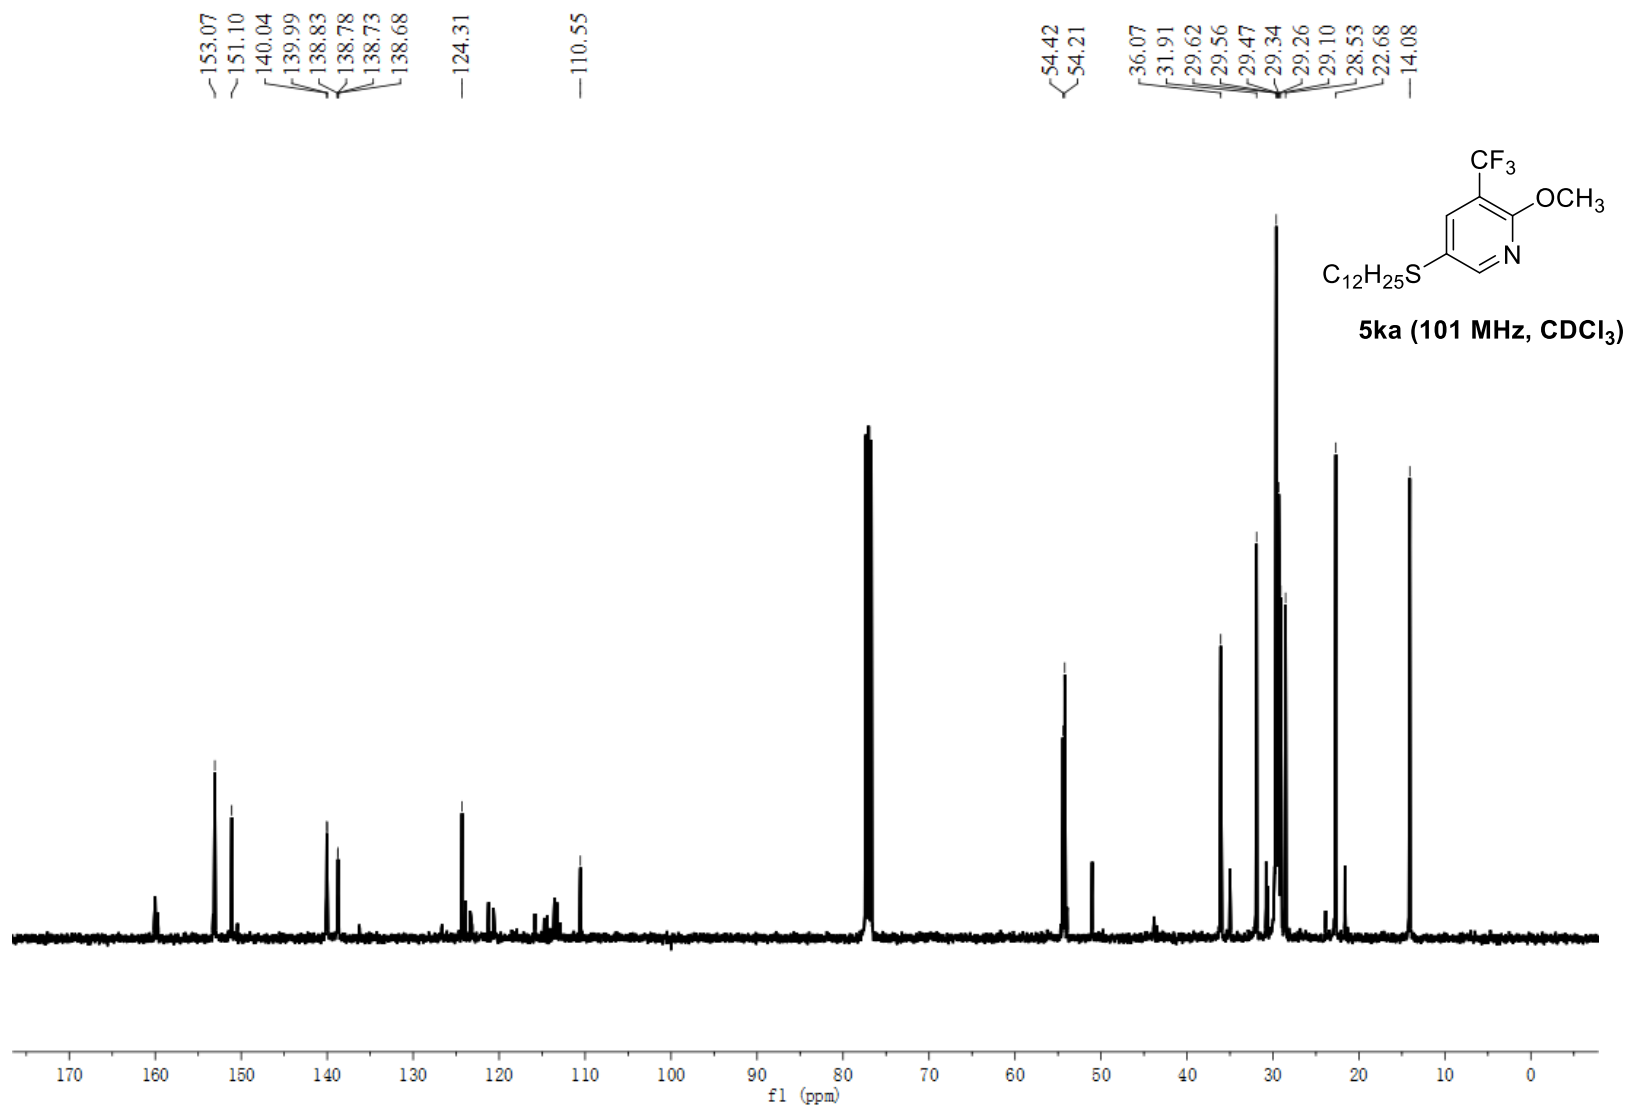

—63.999

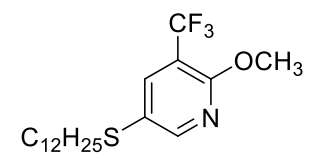

**5ka (376 MHz, CDCl<sub>3</sub>)**

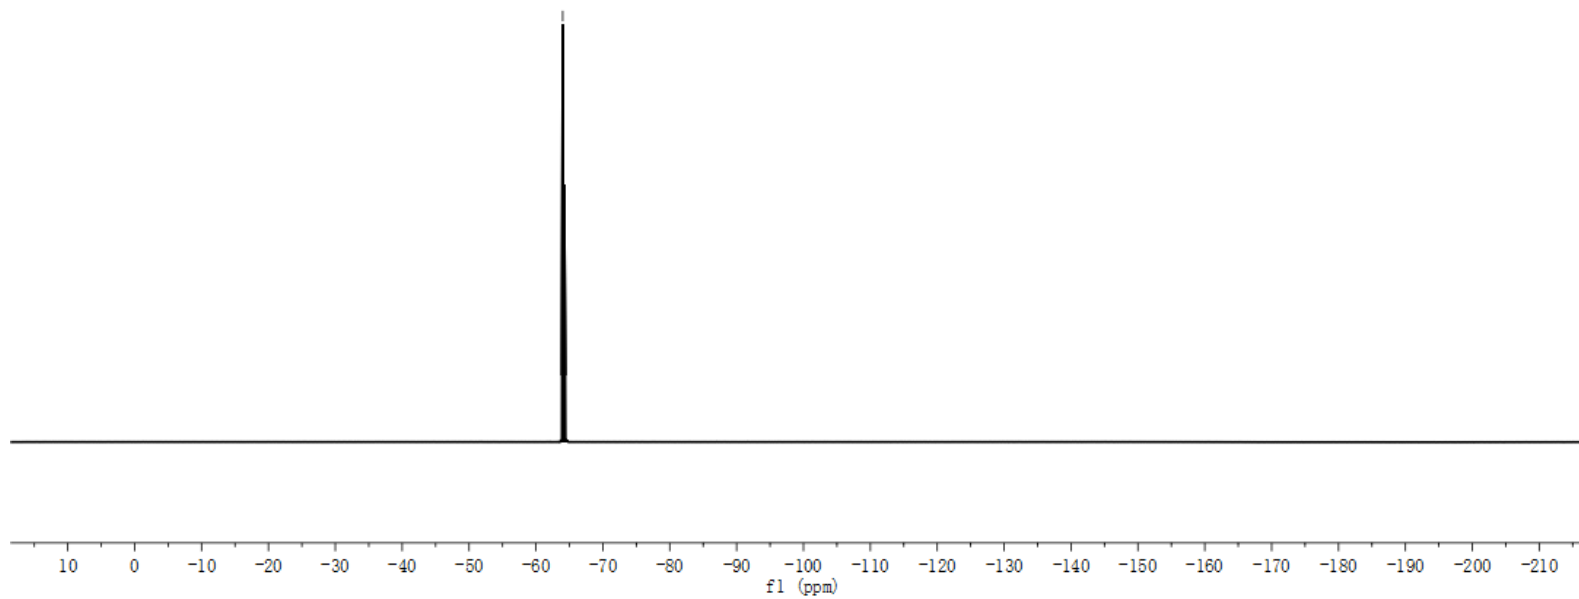

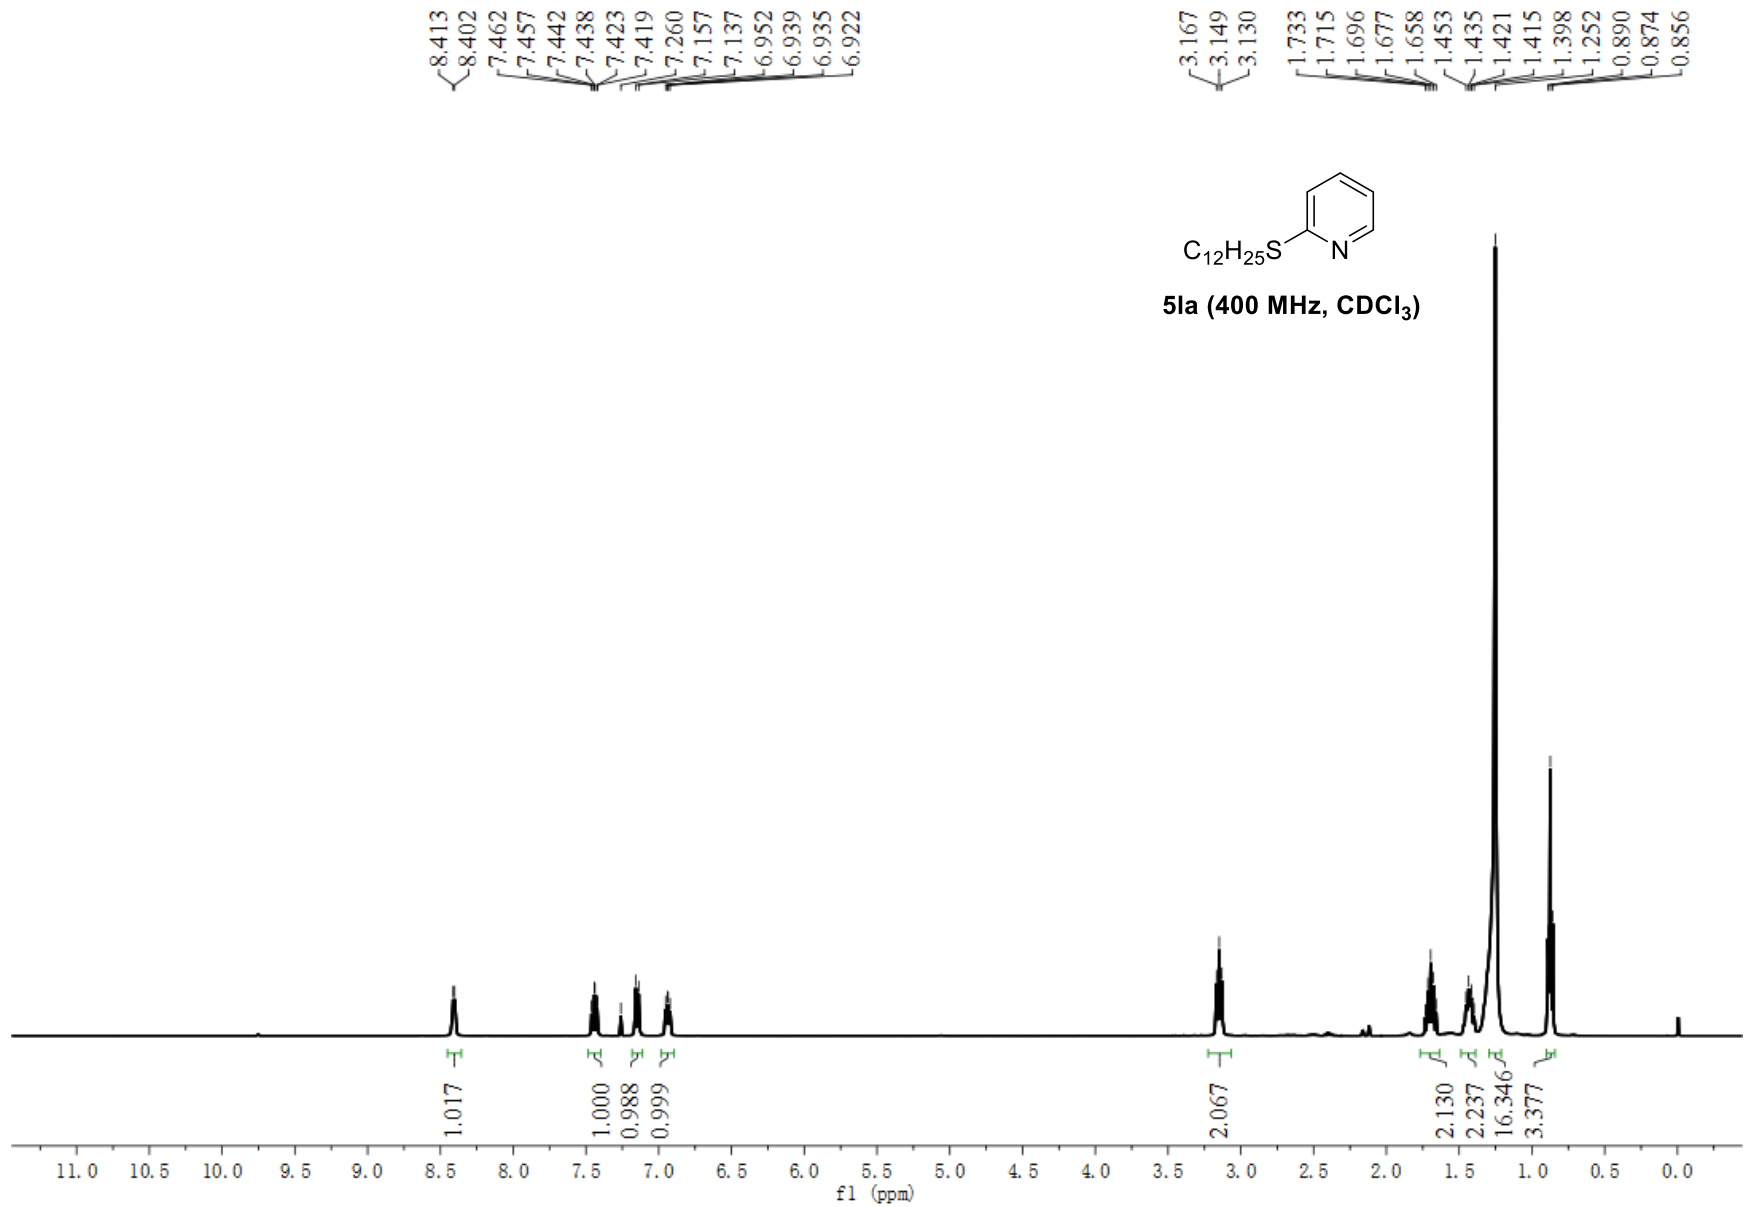

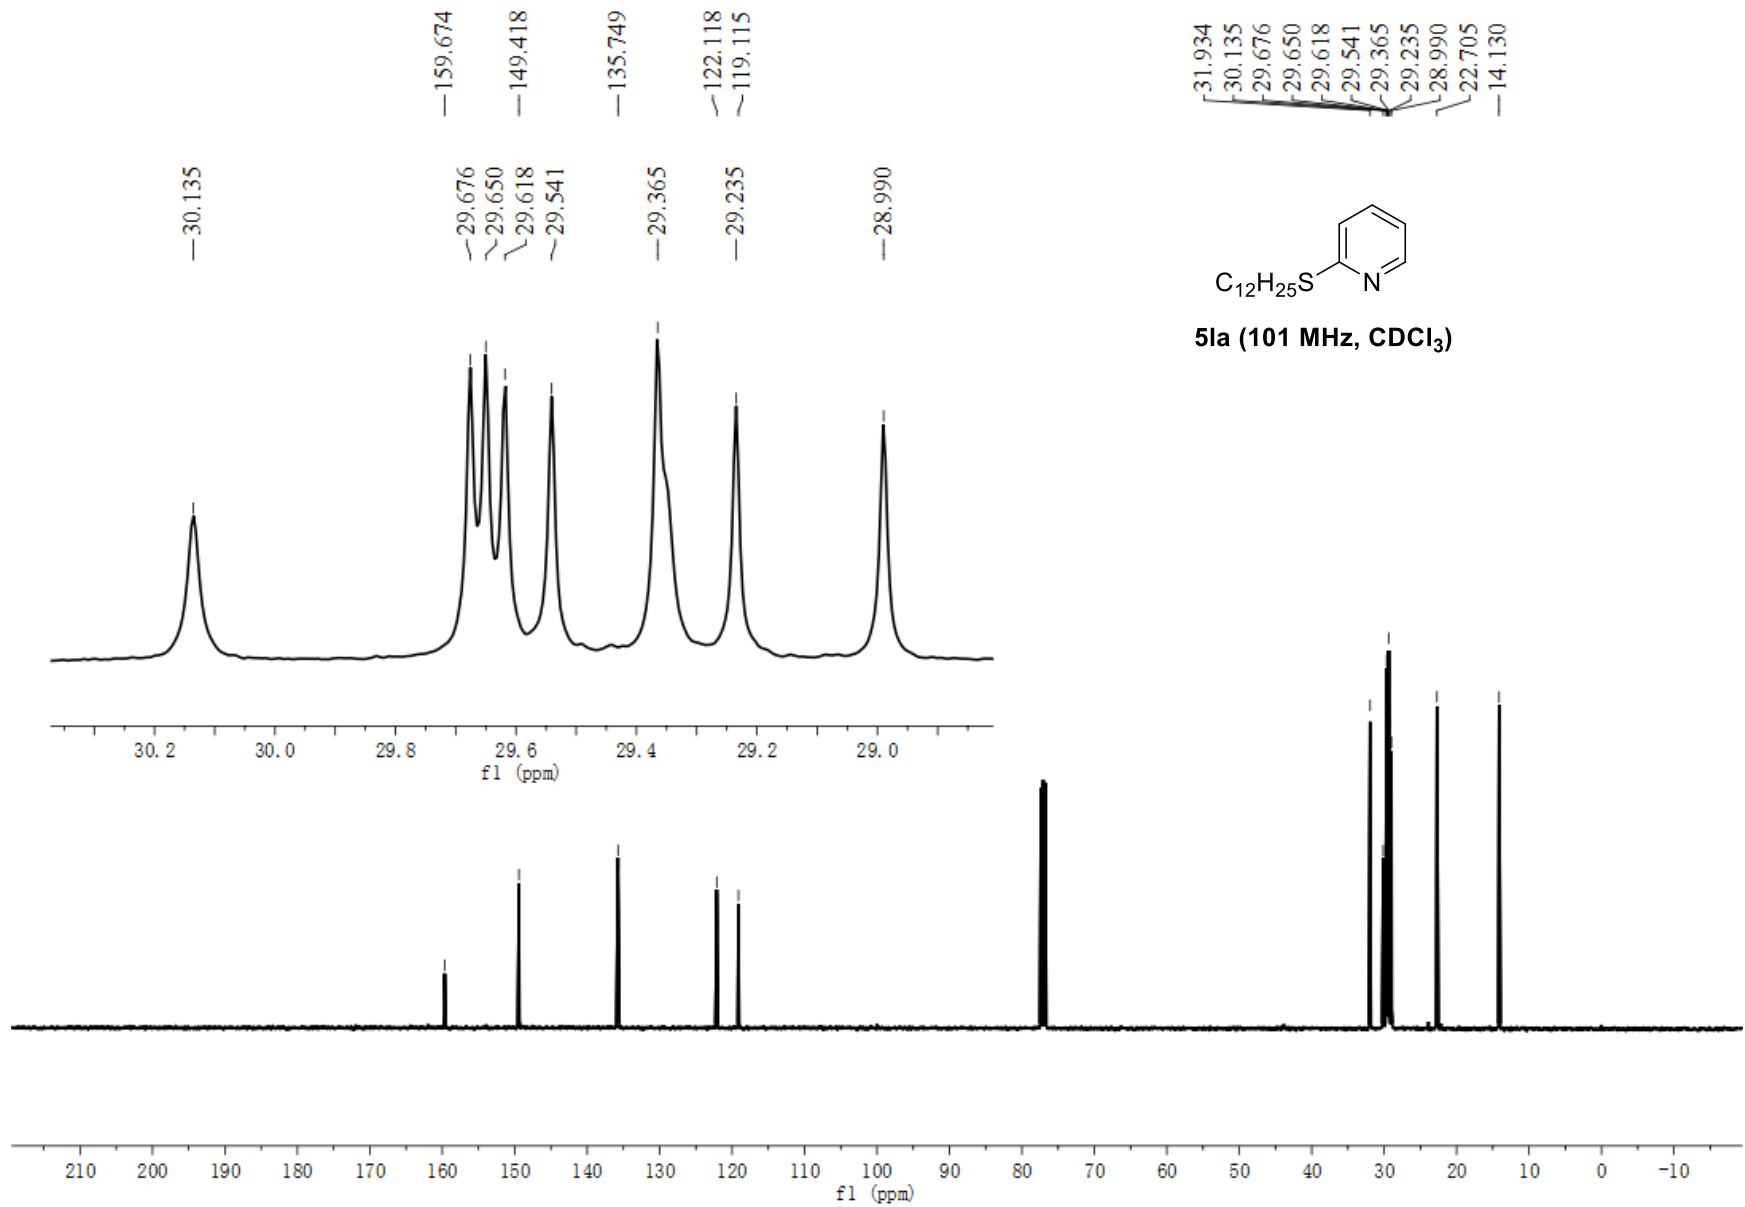

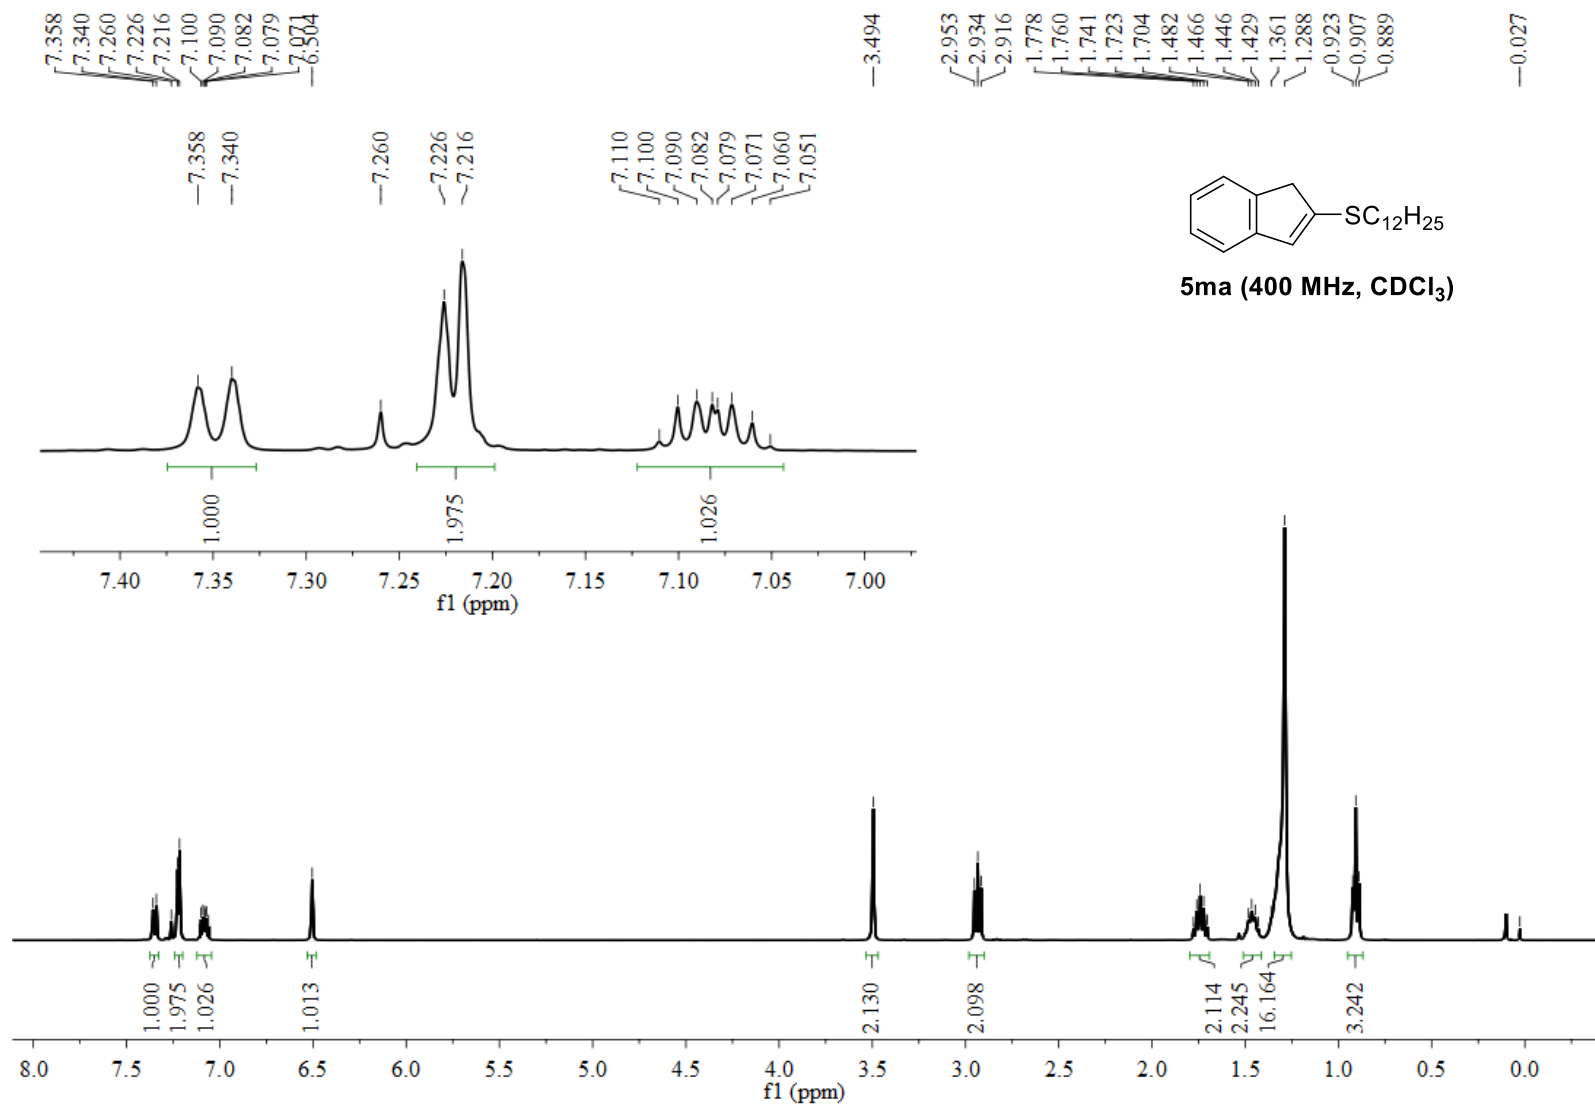

145.222  
144.136  
142.203

126.560  
124.298  
123.375  
123.124  
118.987

77.380  
77.062  
76.745

42.139  
31.964  
29.699  
29.680  
29.640  
22.337  
14.168

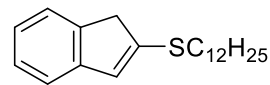

5ma (101 MHz, CDCl<sub>3</sub>)

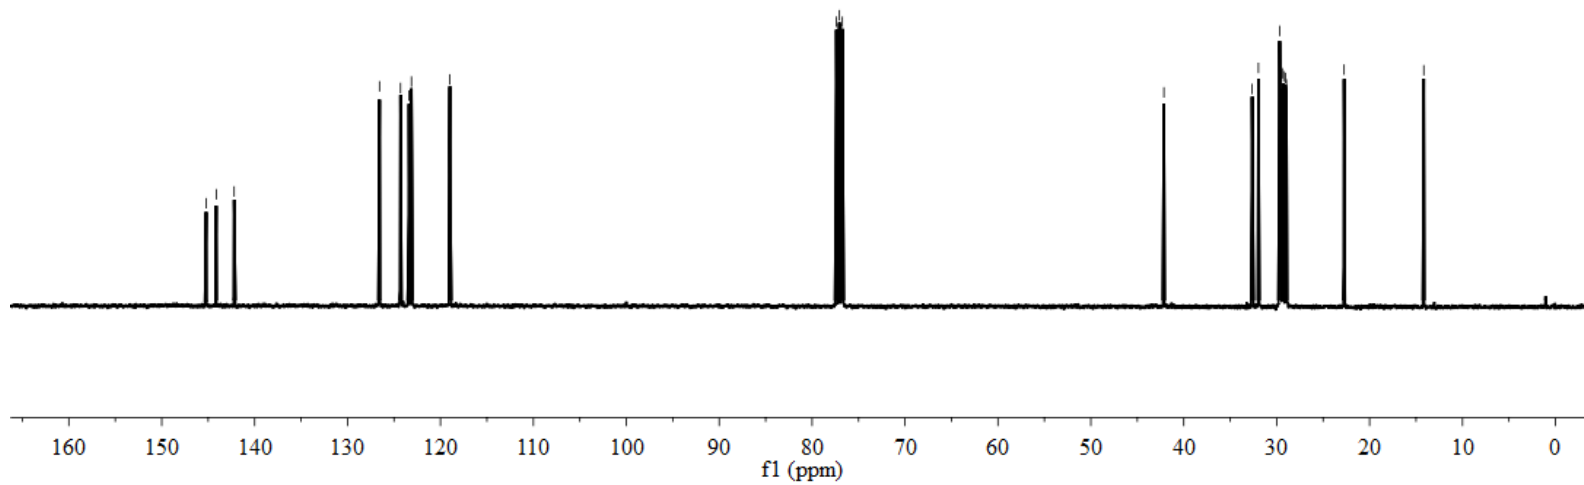

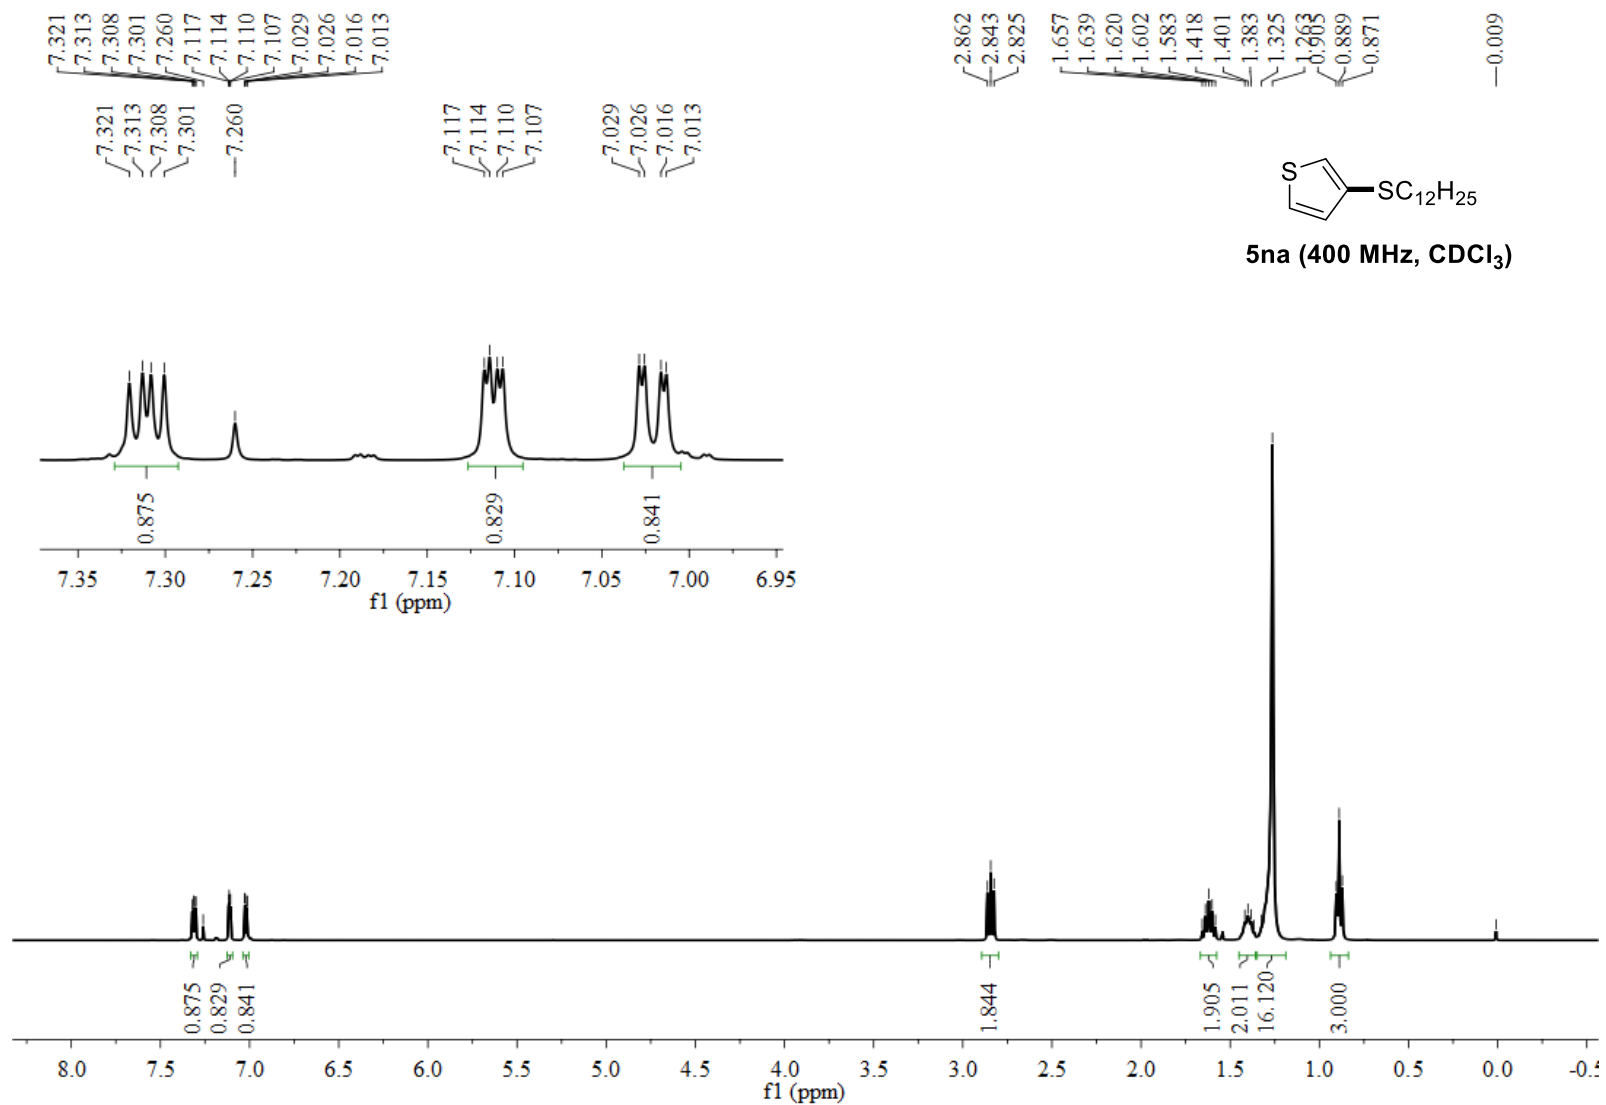



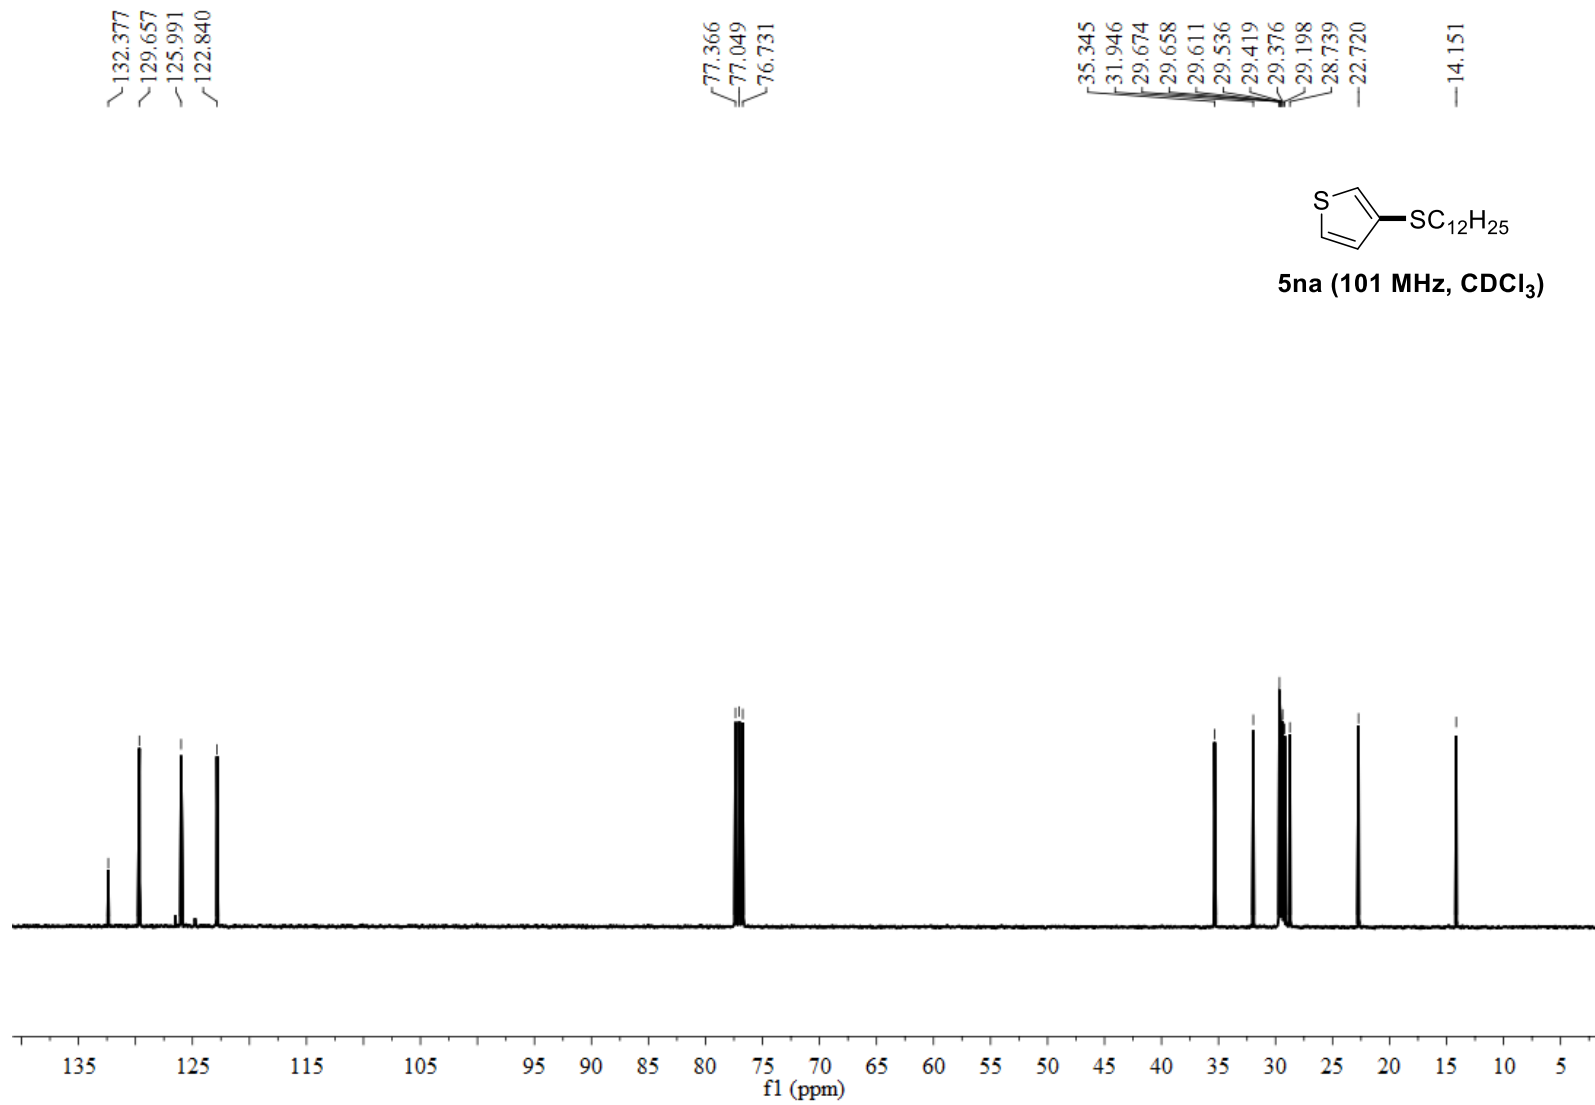

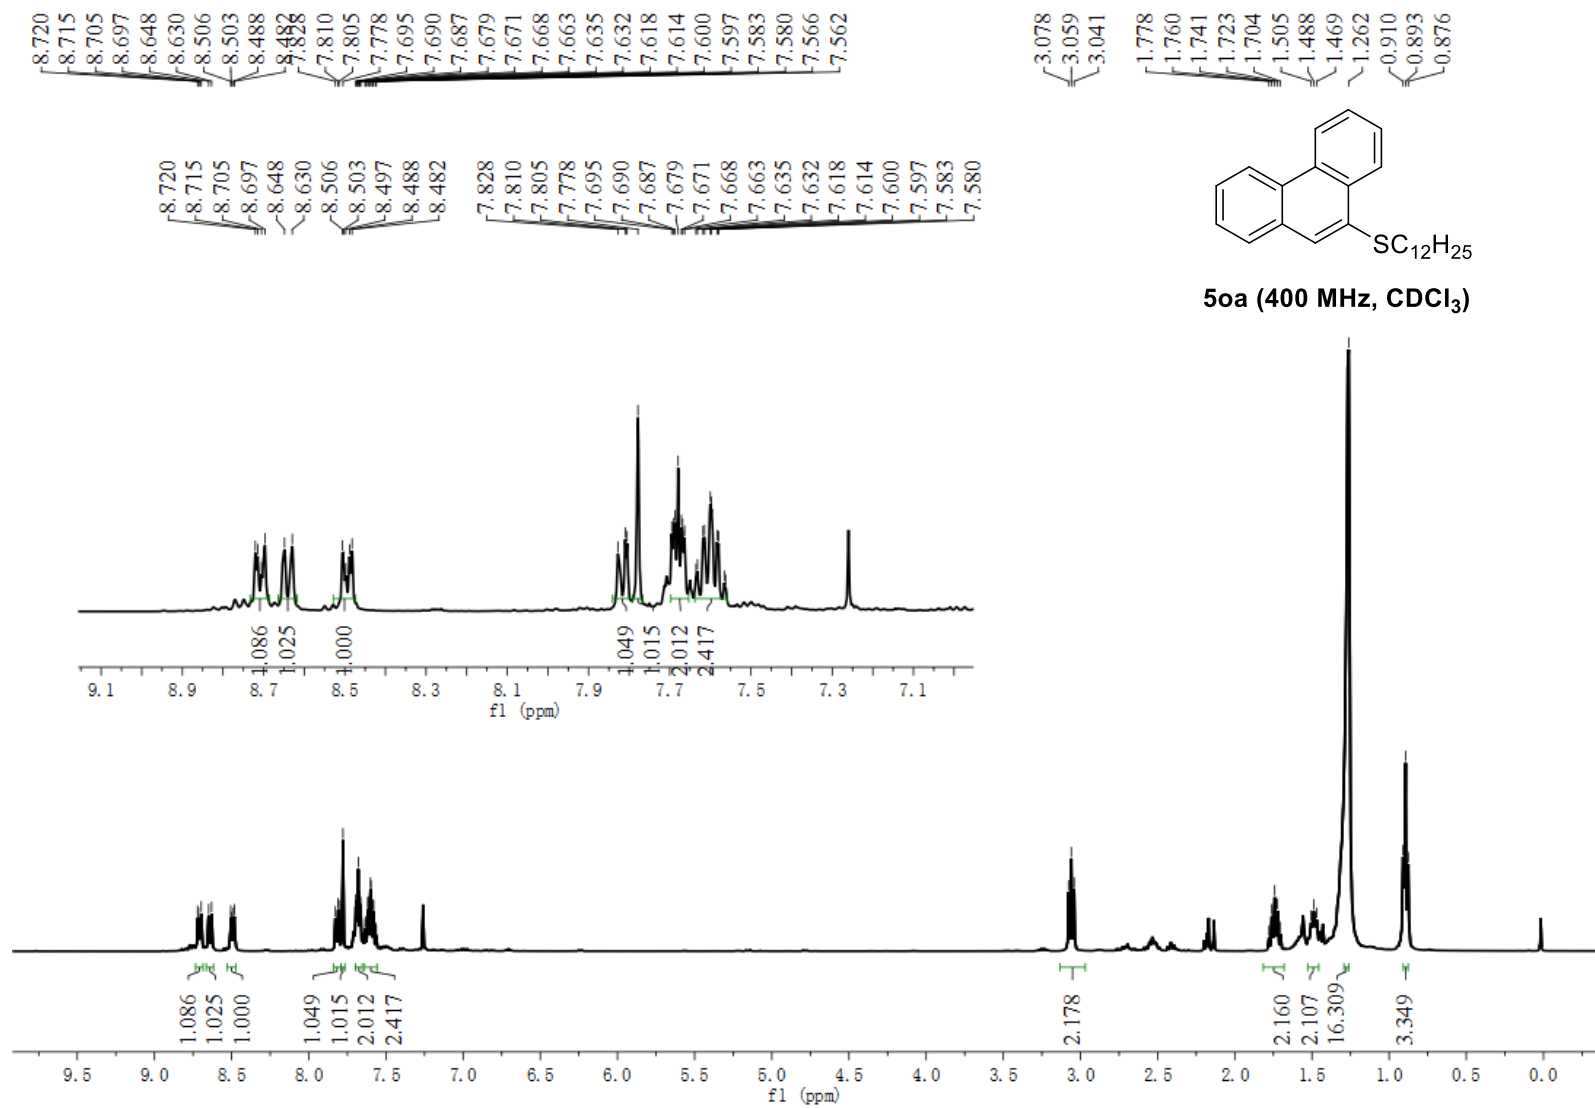

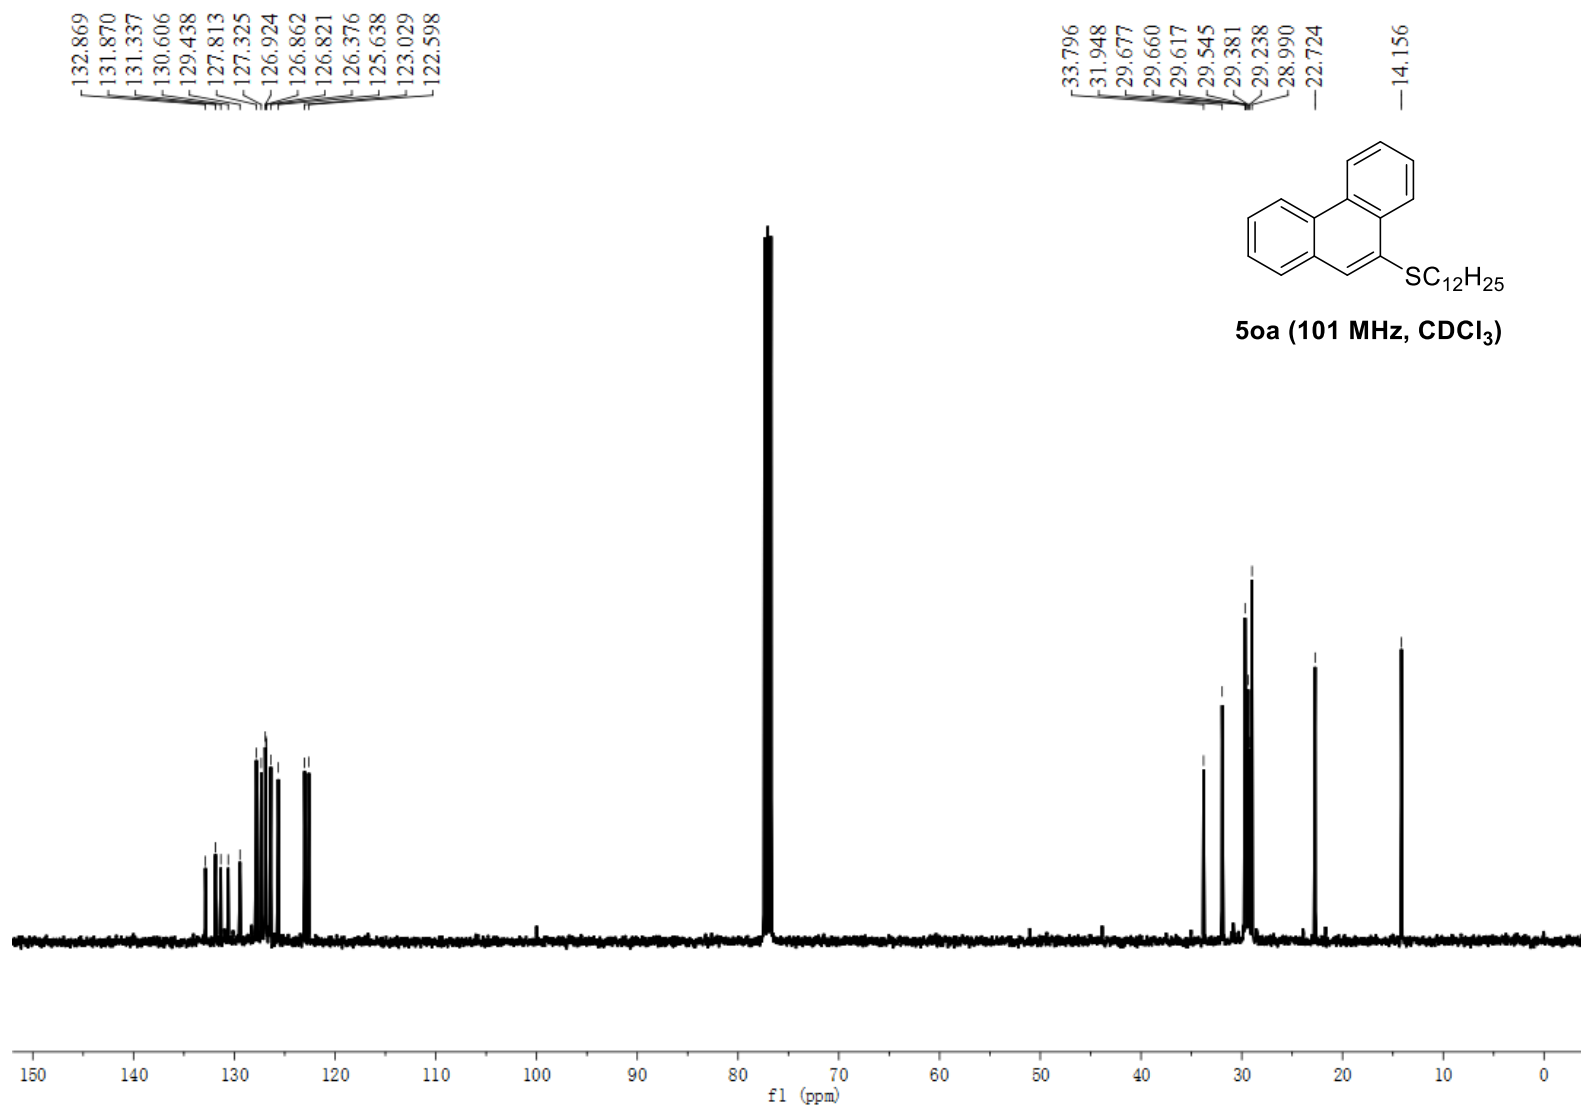

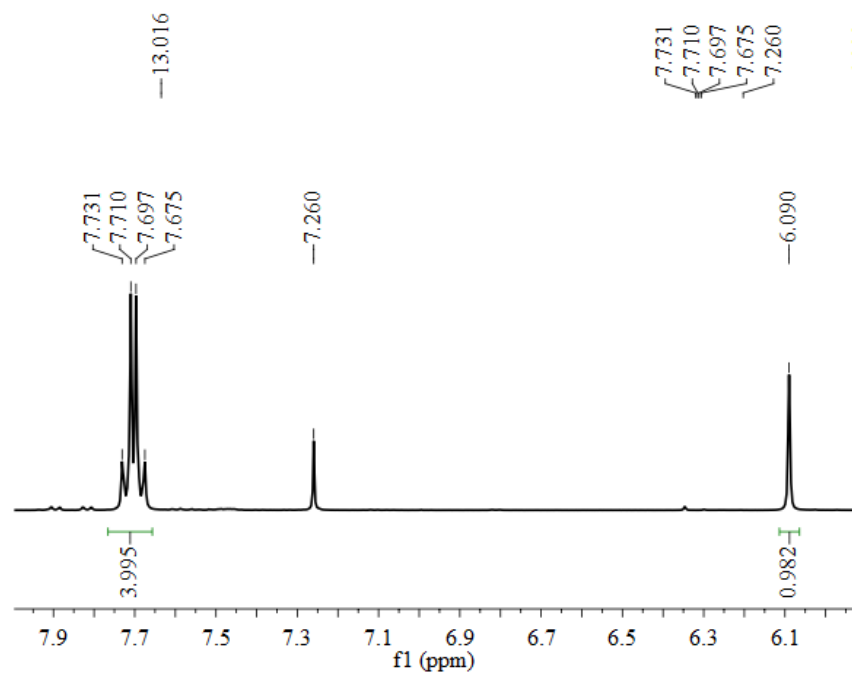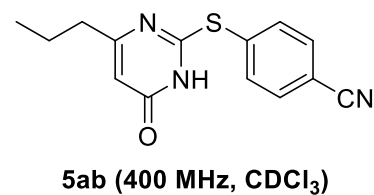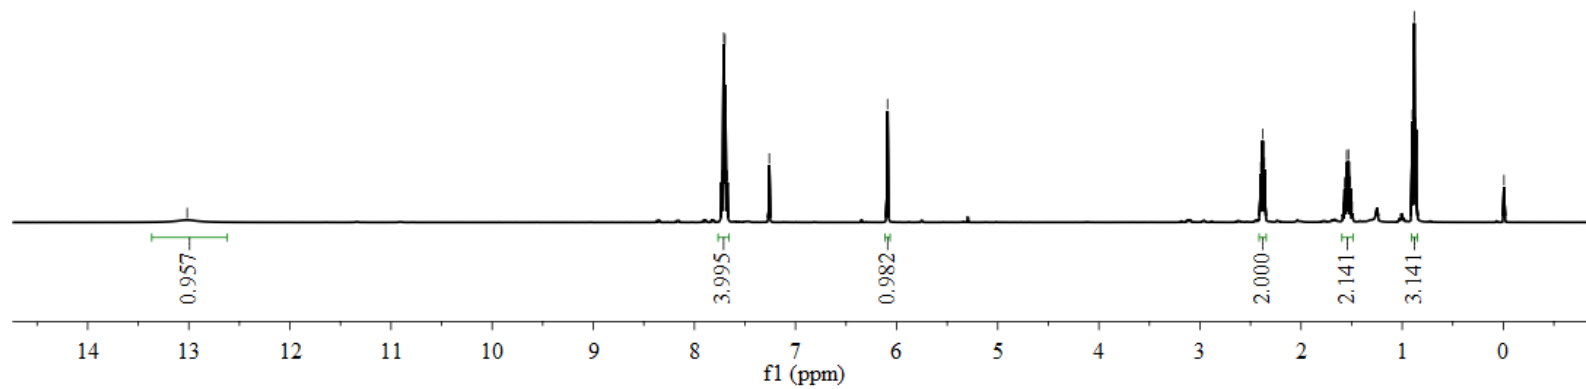

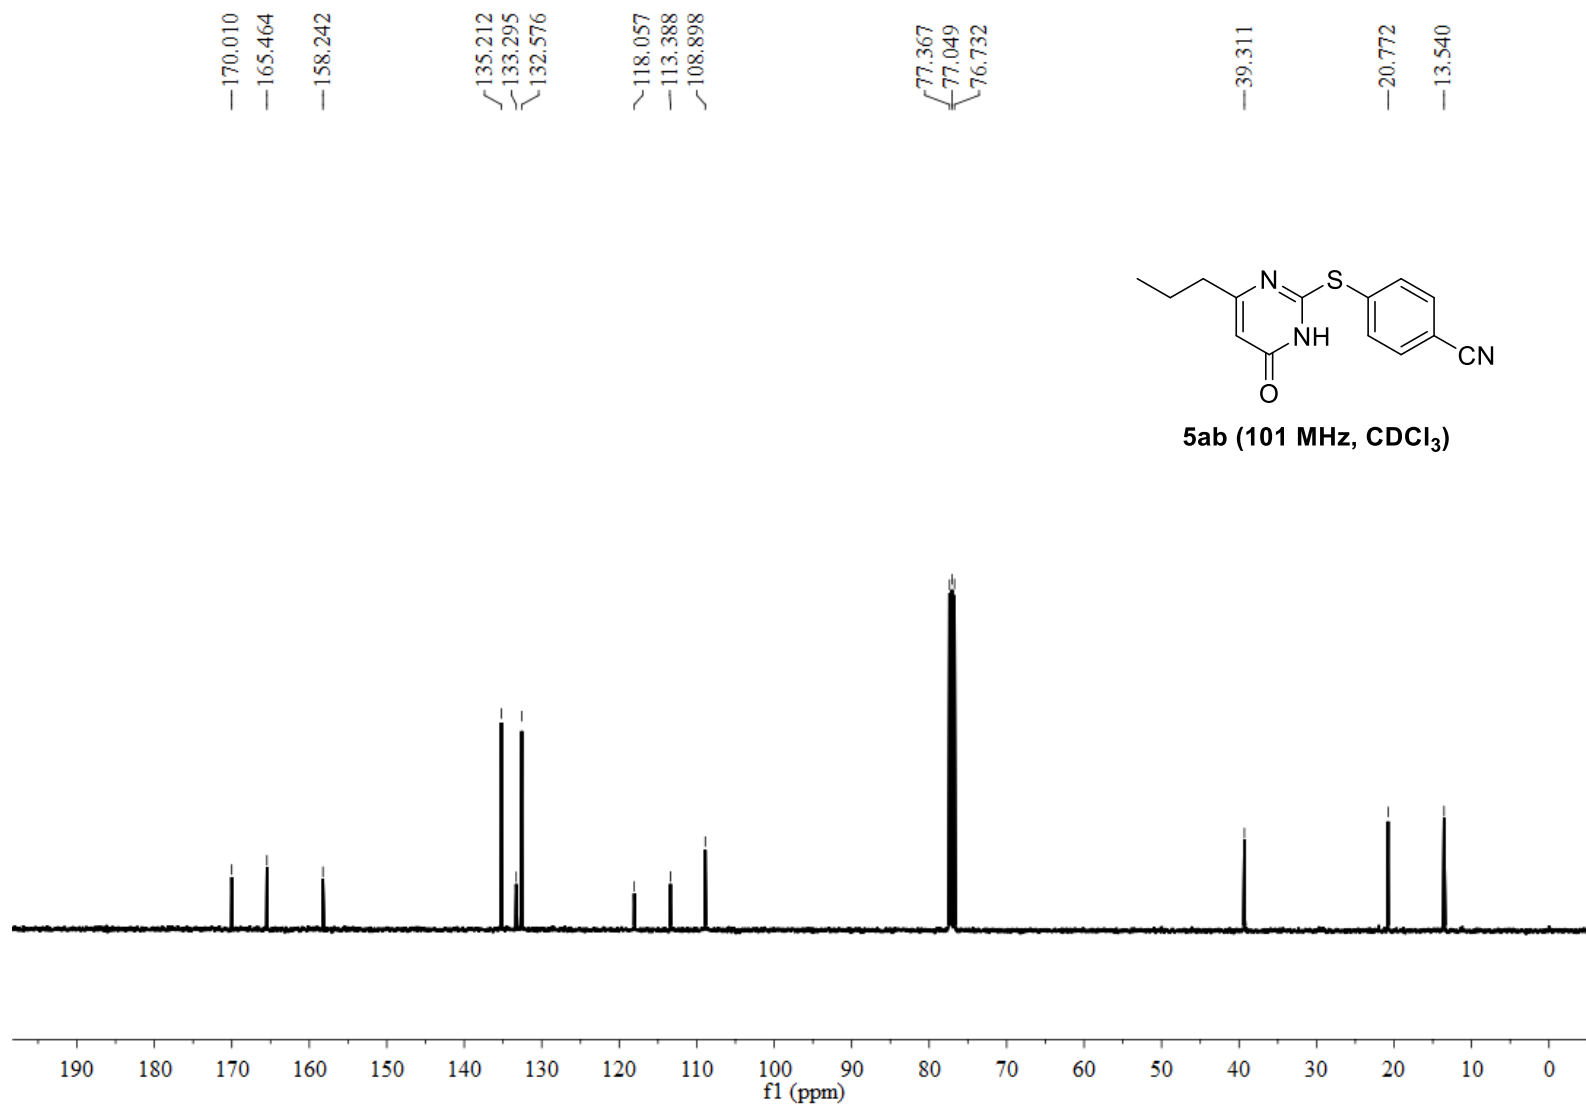

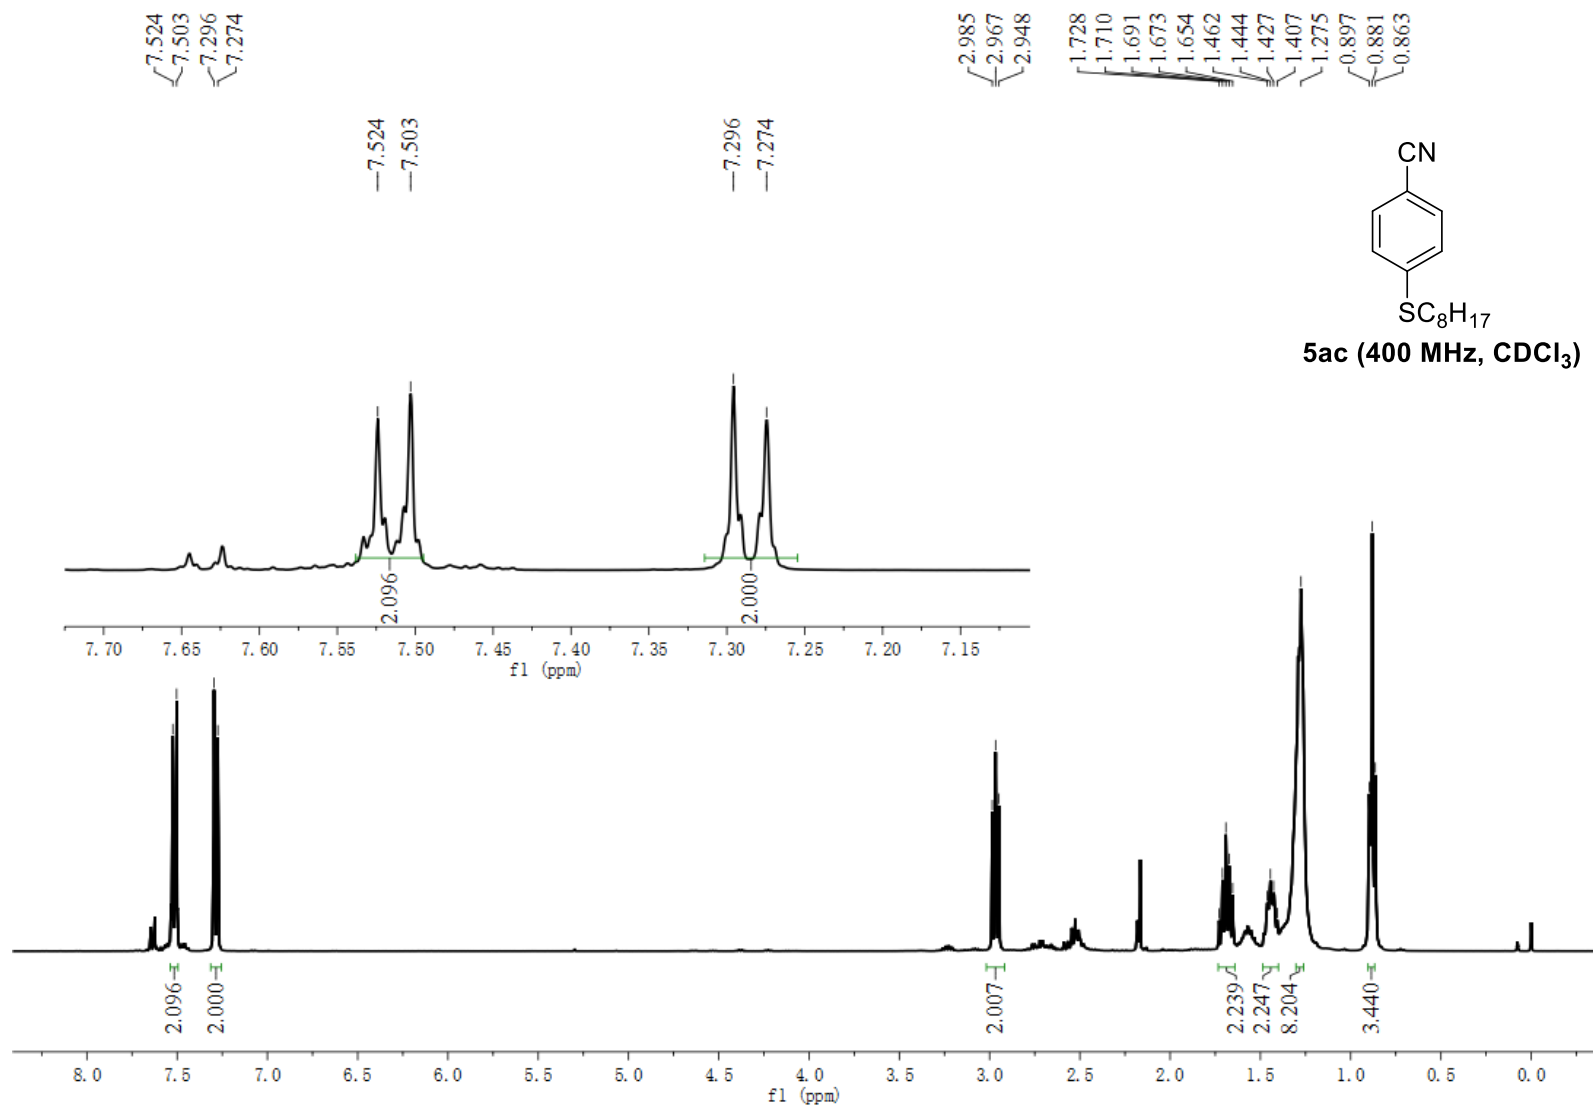

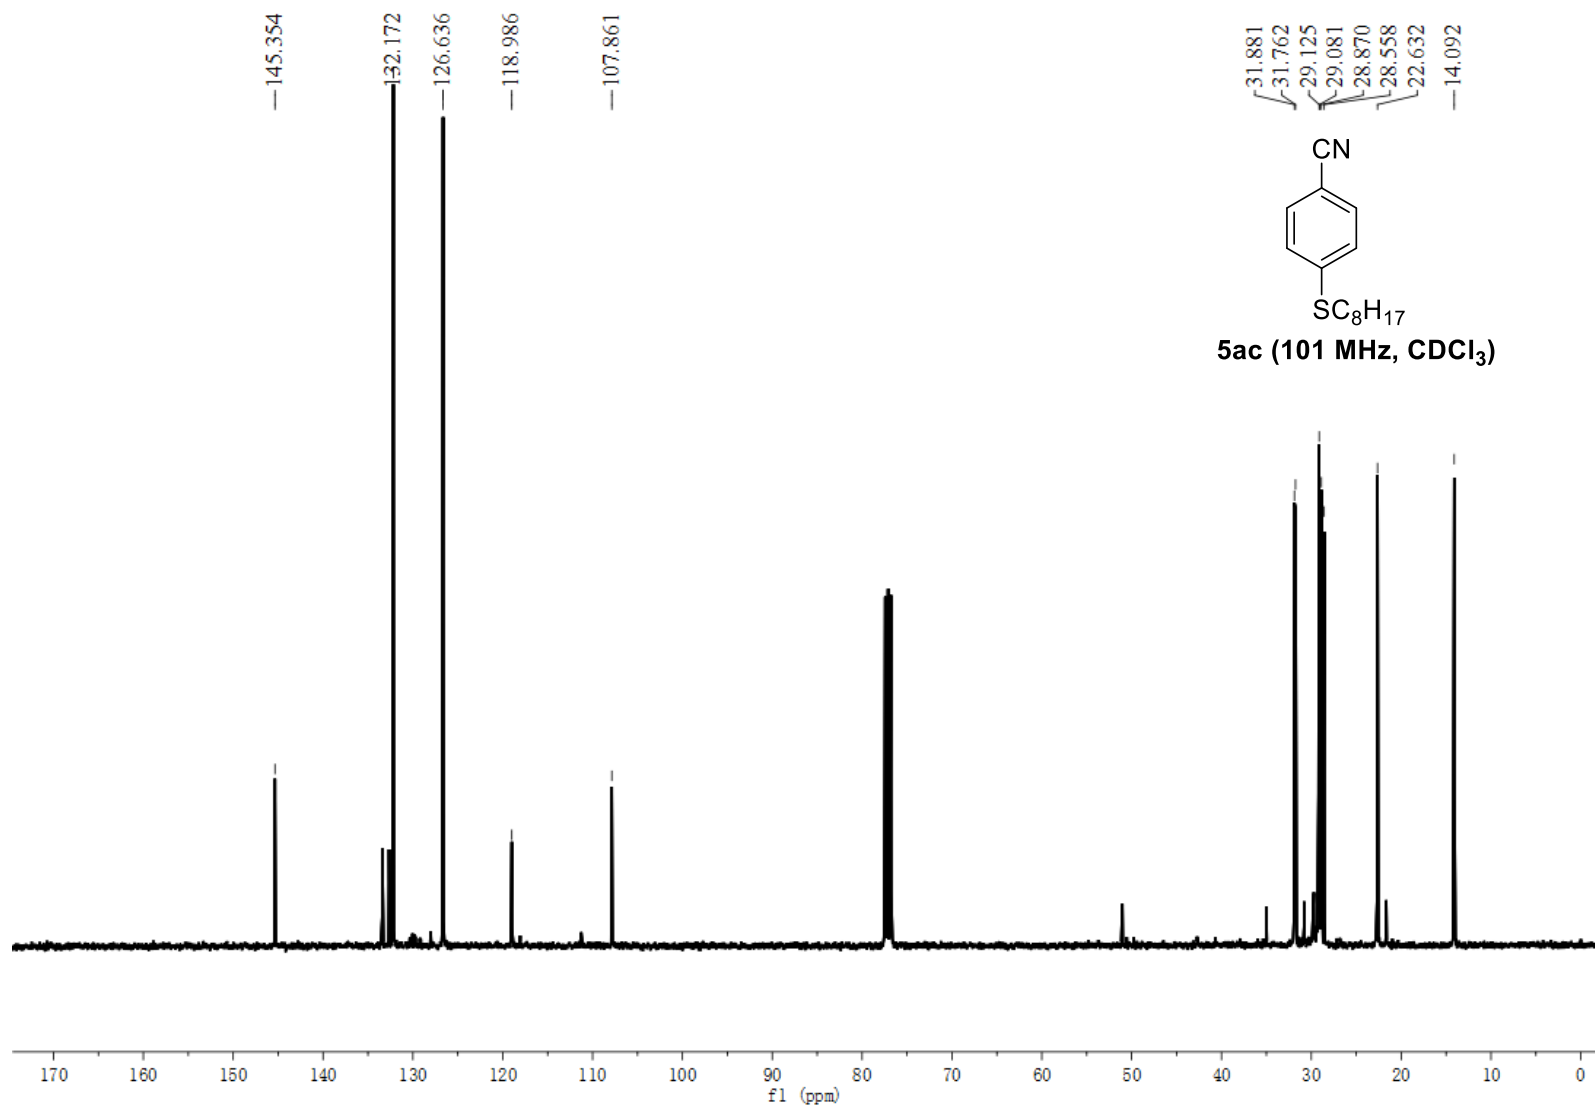

Supplement: d1qo01778k1.pdf [file d1qo01778k1.pdf]
